# Supplementary material for: Opposite effects of chronic HIV infection and antiretroviral medication on organismal and organ-specific biological aging
Source: Research Square preprint supplement (doi:10.21203/rs.3.rs-7234421/v1), 2025-08-29
Supplement: Supplementary file 1 [file 2cbe6ad85c467b0e9f20dd22.xlsx]

## Sheet: Table of Contents
List of supplementary tables
Table #
ST1	The Olink® Explore 3072 panels information
ST2	OOB testing result
ST3	Detailed information on the genome-wide association studies extracted from the OpenGWAS database and used for Mendelian randomization analyses (n = 63 studies).
ST4	Harmonised summary data for SNPs used in Mendelian randomisation analyses of age advancement (exposure) and 63 GWAS diseases (outcomes)
ST5	Organ specific proteins used in this study and normalized expression in GTEX data
ST6	Death causes of 2000HIV participants
ST7	Summary results from Mendelian randomization analyses
ST8	Reverse MR results of GWAS diseases (exposure) on age advancement (outcome)
ST9	Full results of MR estimates (Age advancement on disease outcomes)
ST10	List of current co-administration ART
ST11	List of accumulative co-administration ART

## Sheet: ST1
Cardiometabolic	Cardiometabolic_II	Inflammation	Inflammation_II	Neurology	Neurology_II	Oncology	Oncology_II
AAMDC	AAMDC	A1BG	A1BG	ABHD14B	ADGRV1	AARSD1	ACADM
ABCA2	ABCA2	ABO	ABO	ACVRL1	AGBL2	ABL1	ACOT13
ABRAXAS2	ABRAXAS2	ACE	ACE	ADAM22	AIDA	ACAA1	ACRBP
ACADSB	ACADSB	ACHE	ACHE	ADAM8	AK2	ACADM	ADAM9
ACAN	ACSL1	ACP1	ACP1	ADGRB3	AKR1B10	ACOT13	ADGRE1
ACE2	ACTN2	ACRV1	ACRV1	ADGRV1	AKT2	ACP6	AHSA1
ACOX1	ACY3	ACTN4	ACYP1	AFP	ALDH5A1	ACRBP	ALDH2
ACP5	ADAMTSL2	ACYP1	ADAM12	AGBL2	AMIGO1	ADAM9	ALMS1
ACSL1	ADAMTSL4	ADA	ADAMTS1	AGR2	AMPD3	ADAMTS15	AMOTL2
ACTA2	ADAMTSL5	ADAM12	ADAMTS4	AHSP	AP2B1	ADAMTS8	ANKRA2
ACTN2	ADGRF5	ADAM23	ADD1	AIDA	AP3S2	ADCYAP1R1	AP1G2
ACY1	ADRA2A	ADAMTS1	ADGRD1	AK2	ARFIP1	ADGRE1	AP3B1
ACY3	AHNAK	ADAMTS4	ADH1B	AKR1B10	ARHGEF1	ADGRG1	ARAF
ADA2	AHNAK2	ADD1	ADIPOQ	AKT1S1	ARHGEF10	ADM	ARF6
ADAM15	AIF1L	ADGRD1	AFAP1	AKT2	ARHGEF5	AGR3	ARG2
ADAMTS13	AMDHD2	ADGRE2	AFM	ALDH1A1	ARID3A	AHSA1	ARHGAP30
ADAMTS16	ANK2	ADH1B	AGT	ALDH5A1	ARMCX2	AIF1	ARHGAP5
ADAMTSL2	ANP32C	ADIPOQ	AHSG	AMFR	ART5	AIFM1	ATF4
ADAMTSL4	ANXA2	AFAP1	AKAP12	AMIGO1	ASPSCR1	AKR1B1	ATG16L1
ADAMTSL5	APOBR	AFM	AKR7L	AMPD3	ATXN2	AKT3	ATP1B4
ADGRE5	ARL13B	AGER	ALPI	ANXA10	ATXN2L	ALDH2	ATRAID
ADGRF5	ARL2BP	AGRN	AMOT	ANXA3	ATXN3	ALMS1	BCL2
ADGRG2	ARNTL	AGRP	AMY1A_AMY1B_AMY1C	ANXA5	AZI2	ALPP	BCL7A
ADH4	ASAH1	AGT	ANKMY2	AP2B1	BAP18	AMBP	BCL7B
ADRA2A	ASPN	AHSG	ANXA1	AP3S2	BATF	AMIGO2	BEX3
AGXT	ASRGL1	AKAP12	APCS	APOH	BCAT2	AMOTL2	BRAP
AHCY	ASS1	AKR7L	APOA1	APP	BCL2L1	ANGPT2	BRD1
AHNAK	ATP1B1	ALDH3A1	APOA2	APRT	BHLHE40	ANGPTL7	BSND
AHNAK2	ATP1B2	ALPI	APOA4	ARFIP1	BLOC1S2	ANKRA2	BTLA
AIF1L	ATP1B3	AMBN	APOB	ARHGEF1	BLOC1S3	ANKRD54	BTN1A1
AK1	ATP2B4	AMN	APOC1	ARHGEF10	BOLA1	AP1G2	BTNL10
AKR1C4	ATP5F1D	AMOT	APOD	ARHGEF5	BRD2	AP3B1	C9orf40
ALCAM	ATP6V1G1	AMY1A_AMY1B_AMY1C	APOE	ARID3A	BRME1	APBB1IP	CA7
AMDHD2	ATP6V1G2	ANGPT1	APOF	ARID4B	BRSK2	APEX1	CAPN3
AMY2A	B3GAT3	ANGPTL2	APOL1	ARMCX2	C1QBP	ARAF	CASP4
AMY2B	B3GNT7	ANGPTL4	APPL2	ARSA	C1QTNF6	AREG	CCDC134
ANG	BCAT1	ANKMY2	ARHGAP45	ART5	C2orf69	ARF6	CCND2
ANGPTL1	BDNF	ANXA1	ASGR2	ASAH2	C7orf50	ARG1	CD101
ANGPTL3	BECN1	ANXA11	ATRN	ASGR1	CABP2	ARG2	CD3E
ANK2	BGLAP	AOC1	B2M	ASPSCR1	CACNA1C	ARHGAP1	CD82
ANP32C	BHMT2	APCS	BABAM1	ATF2	CACNB1	ARHGAP30	CD86
ANPEP	BNIP2	APOA1	BAG4	ATP5PO	CACNB3	ARHGAP5	CDC123
ANXA2	BOLA2_BOLA2B	APOA2	BCHE	ATP6V1F	CADPS	ARSB	CDC25A
ANXA4	BPIFA2	APOA4	BCL2L15	ATXN10	CALCB	ATF4	CDC26
AOC3	BPIFB2	APOB	BLNK	ATXN2	CAMLG	ATG16L1	CDC42BPB
APLP1	BRD3	APOC1	BMP10	ATXN2L	CAMSAP1	ATG4A	CDH22
APOBR	BRDT	APOD	BMPER	ATXN3	CAPS	ATOX1	CDK1
APOM	C1GALT1C1	APOE	BNIP3L	AZI2	CASC3	ATP1B4	CEACAM16
ARL13B	CACNA1H	APOF	BTD	B4GAT1	CASP7	ATP6AP2	CEACAM18
ARL2BP	CALCOCO2	APOL1	C1QL2	BAG3	CBLN1	ATP6V1D	CEACAM19
ARNTL	CALY	APPL2	C1QTNF5	BAP18	CCAR2	ATRAID	CEACAM20
ART3	CASQ2	ARHGAP45	C1QTNF9	BATF	CCDC28A	BAIAP2	CENPF
ASAH1	CBS	ARHGEF12	C1R	BAX	CCDC50	BAMBI	CENPJ
ASPN	CBX2	ARNT	C1RL	BCAM	CD164L2	BCL2	CEP152
ASRGL1	CCER2	ARTN	C1S	BCAN	CD3D	BCL7A	CEP290
ASS1	CD2	ASGR2	C3	BCAT2	CDAN1	BCL7B	CEP350
ATP1B1	CD248	ATP5IF1	C5	BCL2L1	CDH23	BEX3	CETN3
ATP1B2	CD80	ATRN	C7	BHLHE40	CDH4	BGN	CHCHD6
ATP1B3	CDA	AXIN1	C8B	BIN2	CDK5RAP3	BIRC2	CINP
ATP2B4	CEACAM6	B2M	C9	BLOC1S2	CDKL5	BRAP	CIRBP
ATP5F1D	CELA2A	B4GALT1	CA8	BLOC1S3	CEND1	BRD1	CLASP1
ATP6V1G1	CEP112	BABAM1	CACYBP	BLVRB	CGN	BSND	CLINT1
ATP6V1G2	CEP170	BACH1	CASP9	BMP4	CHCHD10	BTC	CMIP
AXL	CHGA	BAG4	CAT	BOLA1	CHM	BTLA	COL24A1
AZU1	CHMP6	BANK1	CCNE1	BRD2	CHP1	BTN1A1	COL4A4
B3GAT3	CILP	BCHE	CD226	BRK1	CHRM1	BTNL10	COL9A2
B3GNT7	CKB	BCL2L11	CD300A	BRME1	CIT	C4BPB	COMMD9
BAG6	CLEC4M	BCL2L15	CD36	BRSK2	CLEC2L	C9orf40	CPLX2
BCAT1	CMC1	BCR	CD3G	BST1	CLGN	CA11	CREB3
BDNF	CNP	BID	CD5L	BST2	CLIC5	CA12	CREBZF
BECN1	COCH	BLNK	CD7	C19orf12	CLNS1A	CA14	CTAG1A_CTAG1B
BGLAP	COL15A1	BMP10	CD72	C1QBP	CLSTN3	CA7	CWC15
BHMT2	COL2A1	BMPER	CEBPA	C1QTNF6	CNGB3	CA9	CYB5A
BLMH	COL3A1	BNIP3L	CELSR2	C2CD2L	CNTF	CALB1	CYB5R2
BMP6	COMMD1	BSG	CEMIP2	C2orf69	CNTNAP4	CALCOCO1	CYTH3
BNIP2	COPB2	BTD	CFB	C7orf50	COL28A1	CAMKK1	DCDC2C
BOC	COQ7	BTN2A1	CFD	CA2	CORO6	CAPG	DCLRE1C
BOLA2_BOLA2B	COX6B1	BTN3A2	CFH	CA6	CRTAP	CAPN3	DCUN1D2
BPIFA2	CPQ	C1QA	CFHR2	CABP2	CRYBB2	CASP4	DDX1
BPIFB1	CPTP	C1QL2	CFHR4	CACNA1C	CRYGD	CASP8	DHPS
BPIFB2	CPXM2	C1QTNF5	CFHR5	CACNB1	CRYM	CBLN4	DNAJA1
BRD3	CRYBB1	C1QTNF9	CFI	CACNB3	CSNK2A1	CCDC134	DNAJB14
BRDT	CRYZL1	C1R	CFP	CADPS	CSPG5	CCL8	DNAJC9
C1GALT1C1	CSDE1	C1RL	CGB3_CGB5_CGB8	CALB2	CTNNA1	CCN1	DNM1
C1QTNF1	CSF2	C1S	CHAD	CALCA	CTRL	CCN4	DTNB
C2	CSPG4	C3	CLEC12A	CALCB	CUZD1	CCND2	DUSP13
CA1	CSRP3	C5	CLEC3B	CAMLG	DCC	CCT5	DUT
CA13	CTHRC1	C7	CLU	CAMSAP1	DCUN1D1	CD101	DYNC1H1
CA3	CTLA4	C8B	COL5A1	CAPS	DDHD2	CD1C	DYNLT3
CA4	CYP24A1	C9	CPA4	CARHSP1	DDX25	CD207	EDDM3B
CA5A	CYTL1	CA8	CPB2	CASC3	DDX53	CD27	EFCAB14
CACNA1H	DDA1	CACYBP	CPOX	CASP1	DEFB104A_DEFB104B	CD28	EFCAB2
CALCOCO2	DDT	CASP2	CR1	CASP10	DEFB116	CD300E	EGFLAM
CALY	DENND2B	CASP9	CRELD1	CASP7	DEFB118	CD300LF	EIF2AK2
CANT1	DHODH	CAT	CRISP3	CBLN1	DGCR6	CD302	ENDOU
CASP3	DLL4	CCL11	CSF1R	CC2D1A	DHRS4L2	CD33	ENOPH1
CASQ2	DMD	CCL13	CSF2RB	CCAR2	DIPK1C	CD38	ENSA
CBLIF	DMP1	CCL17	CSF3R	CCDC28A	DLG4	CD3E	EPGN
CBS	DNAJC6	CCL20	CSH1	CCDC50	DLGAP5	CD5	EPN1
CBX2	DTYMK	CCL21	CSNK1D	CCL19	DNAJA4	CD82	ERCC1
CCDC80	ECHDC3	CCL22	CST1	CCL2	DNAJC21	CD86	ERI1
CCER2	ECHS1	CCL23	CTBS	CCN5	DNLZ	CDC123	ERN1
CCL14	ECI2	CCL24	CTSE	CCS	DNM3	CDC25A	ESPL1
CCL15	EDEM2	CCL25	DAAM1	CD109	DNPEP	CDC26	EVI2B
CCL16	EDN1	CCL26	DAND5	CD164	DOC2B	CDC27	EVPL
CCL18	EEF1D	CCL28	DAPK2	CD164L2	DOCK9	CDC37	FAM13A
CCL27	EHBP1	CCL3	DBH	CD177	DOK1	CDC42BPB	FAM171B
CCL5	EHD3	CCL4	DBN1	CD274	DSCAM	CDH22	FAM3D
CCN3	EIF2AK3	CCL7	DCTD	CD300C	DTX2	CDHR2	FGF7
CD14	EIF2S2	CCN2	DDI2	CD300LG	DUSP29	CDK1	FGF9
CD163	EIF5	CCNE1	DDX39A	CD34	DXO	CDKN1A	FKBPL
CD2	ELN	CD160	DDX4	CD3D	DYNLT1	CDKN2D	FNTA
CD209	ELOB	CD200	DEFB103A_DEFB103B	CD63	ECSCR	CDNF	FOS
CD248	ENO3	CD200R1	DENR	CD74	EDF1	CEACAM1	FUT1
CD2AP	ENOX2	CD22	DGKA	CD8A	EFHD1	CEACAM16	GABARAP
CD46	ENPEP	CD226	DIPK2B	CD99	EFNB2	CEACAM18	GABARAPL1
CD55	ENPP6	CD244	DNAJB2	CD99L2	EIF1AX	CEACAM19	GAD1
CD59	ENTR1	CD276	DNAJB6	CDAN1	EIF4G3	CEACAM20	GADD45B
CD69	EPPK1	CD300A	DTD1	CDCP1	ELAC1	CEACAM3	GAGE2A
CD80	ERVV-1	CD36	ECM1	CDH15	ELAVL4	CEACAM5	GAS2
CD93	EXOSC10	CD3G	EDNRB	CDH23	EPB41L5	CENPF	GATA3
CDA	EXTL1	CD4	EIF4E	CDH3	ERC2	CENPJ	GIMAP8
CDH1	FABP3	CD40	EP300	CDH4	ESYT2	CEP152	GIPC3
CDH17	FAM172A	CD40LG	EPHA4	CDHR1	FAM171A2	CEP20	GJA8
CDH2	FAM20A	CD48	ERMAP	CDK5RAP3	FARSA	CEP290	GLIPR1
CDH5	FBLN2	CD58	ERP29	CDKL5	FBN2	CEP350	GLYR1
CDH6	FCAMR	CD5L	ESR1	CEND1	FCER1A	CEP85	GORASP2
CDHR5	FDX1	CD6	EVI5	CERT	FGD3	CES2	GPD1
CEACAM6	FDX2	CD7	F10	CETN2	FGFBP3	CES3	GPHA2
CEACAM8	FGFBP2	CD70	F11	CGA	FH	CETN3	GPIHBP1
CEBPB	FHIP2A	CD72	F12	CGN	FKBP14	CFC1	GPR15L
CELA2A	FRMD4B	CD79B	F13B	CHCHD10	FNDC1	CHAC2	GPRC5C
CELA3A	FSHB	CD83	F2	CHGB	FRMD7	CHCHD6	GRSF1
CEP112	FSTL1	CD84	FCN1	CHM	FTCD	CIAPIN1	GTF2IRD1
CEP170	GADD45GIP1	CDON	FGA	CHMP1A	FZD10	CINP	GUCY2C
CEP43	GALNT5	CDSN	FGF12	CHP1	FZD8	CIRBP	H2AP
CES1	GAMT	CEACAM21	FGF16	CHRM1	GABRA4	CLASP1	HDDC2
CGREF1	GASK1A	CEBPA	FGF20	CIT	GART	CLEC6A	HMMR
CHEK2	GATD3	CELSR2	FGF3	CLEC10A	GAST	CLINT1	HRAS
CHGA	GBP6	CEMIP2	FGF6	CLEC11A	GBA	CLMP	HSPA2
CHI3L1	GCLM	CEP164	FGFR4	CLEC14A	GBP1	CMIP	ID4
CHIT1	GET3	CFB	FGL1	CLEC1B	GCC1	CNPY4	IDO1
CHL1	GGACT	CFD	FN1	CLEC2L	GFRAL	CNTN2	IFI30
CHMP6	GGCT	CFH	FOLH1	CLGN	GID8	COL24A1	IFIT1
CHRDL2	GIP	CFHR2	FOXJ3	CLIC5	GIGYF2	COL4A4	IFIT3
CILP	GM2A	CFHR4	FUOM	CLNS1A	GIPC2	COL9A2	IFNAR1
CKB	GMFG	CFHR5	GAD2	CLPP	GLP1R	COMMD9	IGLON5
CLC	GNPDA1	CFI	GAPDH	CLPS	GNAS	COX5B	IL22
CLEC1A	GOT1	CFP	GC	CLSPN	GNGT1	CPE	IL25
CLEC4M	GP1BB	CGB3_CGB5_CGB8	GCHFR	CLSTN1	GOLGA3	CPLX2	IL2RG
CLEC5A	GRHPR	CHAD	GHR	CLSTN3	GPR101	CPVL	IL3
CLTA	GRP	CHRDL1	GIMAP7	CNGB3	GPR158	CPXM1	IL9
CLUL1	GSTM4	CKAP4	GIPR	CNTF	GRIK2	CRACR2A	IMMT
CMC1	GUK1	CKMT1A_CKMT1B	GIT1	CNTN3	GRIN2B	CREB3	INSL4
CNDP1	HADH	CLEC12A	GLA	CNTN4	GSTT2B	CREBZF	INSL5
CNP	HBZ	CLEC3B	GLI2	CNTN5	GTPBP2	CREG1	IST1
CNPY2	HCG22	CLEC4A	GLRX5	CNTNAP4	HDAC9	CRH	ITGAX
CNST	HEPH	CLEC4C	GMPR2	COL28A1	HDGFL2	CRISP2	ITIH5
CNTN1	HIP1	CLEC4D	GNPDA2	COPE	HEPACAM2	CRNN	IZUMO1
COCH	HMGCL	CLEC4G	GP5	CORO6	HHEX	CTAG1A_CTAG1B	JMJD1C
COL15A1	HMGCS1	CLEC7A	GPI	CPA2	HIP1R	CTSF	JPT2
COL18A1	HPSE	CLIP2	GSN	CPM	HJV	CTSV	KAZN
COL1A1	HRC	CLSTN2	GSR	CPPED1	HLA-A	CWC15	KHDC3L
COL2A1	HS1BP3	CLU	HDAC8	CRADD	HNF1A	CXCL8	KIAA1549
COL3A1	HSBP1	CNTNAP2	HEG1	CRIP2	HNRNPUL1	CYB5A	KIAA1549L
COL4A1	HSD17B3	COL5A1	HGFAC	CRTAM	HSD17B14	CYB5R2	KIAA2013
COL6A3	HSDL2	COL9A1	HIF1A	CRTAP	HTR1A	CYTH3	KIR2DL2
COMMD1	IDO1	COLEC12	HMCN2	CRYBB2	HTR1B	DAB2	KIR2DS4
COMP	IFNW1	CPA4	HRG	CRYGD	IDO1	DCBLD2	KIR3DL2
COMT	IGDCC4	CPB2	HS6ST2	CRYM	IFNL2	DCDC2C	KLK15
COPB2	IGF2BP3	CPOX	IDO1	CSF2RA	IFT20	DCLRE1C	LACRT
COQ7	IGHMBP2	CR1	IGFL4	CSNK2A1	IGBP1	DCTN1	LAMTOR5
CORO1A	IGSF21	CRELD1	IGLC2	CSPG5	IGDCC3	DCTN2	LARP1
COX6B1	IGSF9	CRELD2	IL12RB2	CST5	IL13RA2	DCUN1D2	LMNB1
CPA1	INPP5D	CRHBP	IL20RB	CTNNA1	IMPACT	DCXR	LMOD1
CPB1	ISM2	CRIM1	IL21R	CTRB1	IMPG1	DDAH1	LRRC37A2
CPQ	ITGBL1	CRISP3	IL31	CTRL	INPP5J	DDX1	LRRFIP1
CPTP	ITPA	CRKL	IL31RA	CTSS	INSL3	DDX58	LSM8
CPXM2	ITPR1	CRLF1	IL36A	CUZD1	ITPRIP	DEFB4A_DEFB4B	LTB
CR2	KHK	CSF1	IL36G	CX3CL1	KCNC4	DHPS	LUZP2
CRHR1	KIF1C	CSF1R	INHBB	CXCL11	KCNH2	DKKL1	LYZL2
CRTAC1	KIF22	CSF2RB	INSR	CXCL13	KCTD5	DLL1	MAGEA3
CRX	KLK3	CSF3	ITGA2	CXCL8	KIAA0319	DNAJA1	MAMDC4
CRYBB1	KRT17	CSF3R	ITGAL	DARS1	KIF20B	DNAJB1	MANEAL
CRYZL1	KRT6C	CSH1	ITIH1	DBI	KIRREL1	DNAJB14	MAP2K1
CSDE1	L3HYPDH	CSNK1D	ITIH4	DCC	KLF4	DNAJC9	MAPK13
CSF2	LAMA1	CST1	JAM3	DCTN6	KLHL41	DNM1	MAPKAPK2
CSPG4	LAMB1	CST7	KDM3A	DCUN1D1	KLRC1	DPEP2	MAPRE3
CSRP3	LAMP1	CTBS	KLK7	DDHD2	KLRK1	DPP6	MCTS1
CST3	LCP1	CTRC	KLKB1	DDR1	KRT8	DPY30	MEP1A
CST6	LECT2	CTSC	KLRF1	DDX25	LCN15	DRG2	MINDY1
CSTB	LILRA3	CTSE	LATS1	DDX53	LDLRAP1	DSG3	MLLT1
CTF1	LILRA4	CTSO	LCAT	DEFB104A_DEFB104B	LELP1	DSG4	MNAT1
CTHRC1	LILRA6	CXADR	LEG1	DEFB116	LEO1	DTNB	MORF4L1
CTLA4	LIPF	CXCL1	LGALS3BP	DEFB118	LETM1	DTX3	MORF4L2
CTSB	LMOD1	CXCL10	LMOD1	DGCR6	LMNB2	DUSP13	MORN4
CTSD	LONP1	CXCL12	LPA	DHRS4L2	LMOD1	DUT	MPRIP
CTSH	LPP	CXCL14	LRG1	DIPK1C	LMOD2	DYNC1H1	MRPL52
CTSL	LRCH4	CXCL17	LRIG3	DKK1	LRFN2	DYNLT3	MTHFSD
CTSZ	LRRC59	CXCL3	LYVE1	DKK4	LRP2	EBI3_IL27	MTIF3
CXCL16	M6PR	CXCL6	LZTFL1	DLG4	LRP2BP	EDA2R	MTSS1
CXCL5	MAMDC2	CXCL8	MARS1	DLGAP5	LRRC38	EDDM3B	MTSS2
CXCL8	MAN1A2	CXCL9	MBL2	DNAJA4	LRTM1	EFCAB14	MTUS1
CYP24A1	MAN2B2	DAAM1	MCEMP1	DNAJC21	LRTM2	EFCAB2	MUCL3
CYTL1	MANSC4	DAG1	MDH1	DNLZ	LYPLA2	EGFL7	MYH7B
DCN	MAP1LC3B2	DAND5	MENT	DNM3	LYSMD3	EGFLAM	NACC1
DCTPP1	MECR	DAPK2	MFAP4	DNMBP	MAG	EIF2AK2	NAP1L4
DDA1	MED21	DAPP1	MKI67	DNPEP	MAP1LC3A	ELOA	NCR3LG1
DDC	MEGF11	DBH	MOCS2	DOC2B	MAP2	ENDOU	NDST1
DDT	MELTF	DBN1	MRC1	DOCK9	MCEE	ENOPH1	NDUFB7
DEFA1_DEFA1B	MMP15	DBNL	MRPS16	DOK1	MDM1	ENSA	NEK7
DENND2B	MMUT	DCTD	MST1	DPEP1	MFAP3L	ENTPD2	NENF
DHODH	MRPL24	DDI2	MTDH	DRAXIN	MICALL2	EPGN	NFKB2
DIABLO	MTR	DDX39A	MXRA8	DSC2	MINK1	EPHA2	NFU1
DKK3	MUC2	DDX4	MYOM3	DSCAM	MN1	EPN1	NMI
DLK1	MYBPC1	DECR1	NAGA	DSG2	MORC3	EPS8L2	NMRK2
DLL4	MYBPC2	DEFB103A_DEFB103B	NAGPA	DTX2	MRI1	ERBB2	NUBP1
DMD	MYDGF	DENR	NDUFA5	DUSP29	MRPL28	ERBB4	NUDT16
DMP1	MYH4	DFFA	NECTIN1	DUSP3	MRPL58	ERBIN	OFD1
DNAJB8	MYH9	DGKA	NEDD4L	DXO	MSLNL	ERCC1	OGA
DNAJC6	MYL1	DGKZ	NEDD9	DYNLT1	MTHFD2	ERI1	OGT
DOK2	MYL3	DIPK2B	NEXN	EBAG9	MYCBP2	ERN1	OTUD6B
DPP4	MYL4	DNAJA2	NFAT5	ECE1	MYL6B	ERP44	PAFAH2
DPP7	MYOM2	DNAJB2	NHLRC3	ECSCR	MYLPF	ESPL1	PAIP2B
DPT	NAA10	DNAJB6	NME1	EDF1	MYO6	EVI2B	PALM
DTYMK	NAGK	DNER	NPHS1	EFHD1	MYOM1	EVPL	PARD3
DUOX2	NEB	DNPH1	NPHS2	EFNA1	NAA80	F3	PBK
ECHDC3	NECAP2	DPP10	NRGN	EFNA4	NAPRT	FAM13A	PBXIP1
ECHS1	NFE2	DTD1	NUMB	EFNB2	NARS1	FAM171B	PCDH7
ECI2	NFKB1	ECM1	NXPH3	EIF1AX	NEO1	FAM3B	PCDH9
EDEM2	NFX1	EDAR	OLFM4	EIF4B	NFIC	FAM3D	PCDHB15
EDIL3	NFYA	EDNRB	ORM1	EIF4G3	NGRN	FCGR2B	PCNA
EDN1	NGFR	EGF	PALLD	ELAC1	NLGN1	FCRLB	PCSK7
EEF1D	NIT1	EGLN1	PAXX	ELAVL4	NLGN2	FEN1	PCYT2
EFEMP1	NIT2	EIF4E	PCBD1	ENO1	NMT1	FES	PDCL2
EGFR	NOP56	EIF4G1	PDE5A	ENO2	NRN1	FGF21	PDE1C
EHBP1	NOS2	EIF5A	PDIA3	EPB41L5	NRXN3	FGF23	PDIA2
EHD3	NOTCH2	ENAH	PDZK1	EPHA10	NT5C1A	FGF7	PDIA5
EIF2AK3	NPC2	ENPP5	PENK	EPHB6	OCLN	FGF9	PDXDC1
EIF2S2	NPL	ENPP7	PEPD	ERC2	OMP	FGFBP1	PFDN4
EIF4EBP1	NPR1	EP300	PER3	EREG	OPHN1	FGFR2	PHLDB1
EIF5	NPTX2	EPCAM	PF4	ESYT2	OSBPL2	FKBPL	PHLDB2
ELN	NT5C	EPHA1	PGA4	EZR	OSTN	FLI1	PITHD1
ELOB	NUDT10	EPHA4	PGLYRP2	F11R	OTOA	FLT1	PKN3
ENG	NUDT15	EPO	PGR	FABP5	OTUD7B	FLT3	PPIE
ENO3	NUP50	ERBB3	PHYKPL	FAM171A2	PAFAH1B3	FLT4	PPP1CC
ENOX2	NXPE4	ERMAP	PI16	FARSA	PALM2	FMR1	PPP1R12B
ENPEP	OPLAH	ERP29	PIKFYVE	FBN2	PCARE	FNTA	PPP2R5A
ENPP2	OXCT1	ESM1	PINLYP	FCER1A	PCBP2	FOLR1	PRAME
ENPP6	PACS2	ESR1	PLCB1	FCER2	PCDH12	FOLR3	PRC1
ENTPD5	PAGR1	EVI5	PLG	FCRL5	PDLIM5	FOS	PRUNE2
ENTPD6	PALM3	F10	PNLIP	FGD3	PDRG1	FOXO3	PSAPL1
ENTR1	PDAP1	F11	POF1B	FGFBP3	PFDN6	FURIN	PSCA
EPHB4	PDE4D	F12	POLR2A	FGR	PGM2	FUS	PSMC3
EPHX2	PDIA4	F13B	PON1	FH	PHACTR2	FUT1	PTPRH
EPPK1	PDZD2	F2	PPBP	FHIT	PIBF1	FXN	PTPRK
ERVV-1	PECR	F2R	PPL	FKBP14	PLB1	GABARAP	PTTG1
ESAM	PGD	FABP1	PPM1B	FKBP4	PLCB2	GABARAPL1	PXDNL
EXOSC10	PGLYRP4	FABP9	PRDX2	FKBP5	PLEKHO1	GAD1	RAB2B
EXTL1	PKD1	FASLG	PRKG1	FKBP7	PLSCR3	GADD45B	RAB44
F7	PKD2	FCAR	PROS1	FLRT2	PLXDC2	GAGE2A	RAD51
F9	PMCH	FCN1	PRR4	FMNL1	PMS1	GALNT10	RALY
FABP2	PMM2	FCRL2	PRR5	FNDC1	PNLIPRP1	GALNT2	RAPGEF2
FABP3	PNMA1	FCRL3	PRSS22	FOLR2	PNMA2	GALNT7	RASGRF1
FABP4	POMC	FCRL6	PSMG4	FOSB	PPP1R14A	GAS2	RBM25
FABP6	POSTN	FGA	PSTPIP2	FRMD7	PPP1R14D	GATA3	RBP7
FADD	PPIF	FGF12	PTGES2	FRZB	PPT1	GCG	RCC1
FAM172A	PPM1F	FGF16	PTP4A3	FTCD	PRKAG3	GCNT1	REG3G
FAM20A	PRAP1	FGF19	PTPN9	FUT3_FUT5	PRKAR2A	GFAP	REST
FAM3C	PRG2	FGF2	PTRHD1	FUT8	PRND	GFER	RFC4
FAP	PRG3	FGF20	PZP	FYB1	PRSS53	GFOD2	RGL2
FAS	PRKD2	FGF3	QSOX1	FZD10	PSMD1	GFRA1	RNF4
FBLN2	PROCR	FGF5	RABEP1	FZD8	PSMD5	GFRA2	RNF43
FBP1	PRRT3	FGF6	RALB	GABRA4	PTH	GH2	RPE
FCAMR	PSAP	FGFR4	RAP1A	GART	PTPRR	GIMAP8	S100A3
FCGR2A	PTGR1	FGL1	RBPMS	GAST	RAB3GAP1	GIPC3	SAP18
FCGR3B	PTPRB	FIS1	RELB	GBA	RAC3	GJA8	SAT2
FCN2	PTPRC	FKBP1B	REPS1	GBP1	RANBP2	GLIPR1	SCRIB
FCRL1	PTPRZ1	FLT3LG	RICTOR	GBP4	RBFOX3	GLYR1	SDCCAG8
FDX1	PYDC1	FN1	RIDA	GCC1	RBM17	GNE	SDHB
FDX2	PYY	FOLH1	RLN2	GDNF	RBP1	GORASP2	SEPTIN7
FETUB	RAB10	FOXJ3	RNASE1	GFRA3	REEP4	GPA33	SERPINH1
FGFBP2	RAB11FIP3	FOXO1	RNASE4	GFRAL	RGCC	GPC1	SERPINI2
FHIP2A	RAB27B	FST	RNASE6	GGA1	RGS10	GPD1	SH3BP1
FRMD4B	RAB33A	FSTL3	RNF168	GGT1	RLN1	GPHA2	SH3GL3
FSHB	RAB39B	FUOM	RNF31	GGT5	RNASEH2A	GPIHBP1	SHC1
FSTL1	RANBP1	FXYD5	RPA2	GHRHR	RPGR	GPR15L	SHPK
FUCA1	RBM19	GAD2	S100A13	GID8	RRAS	GPRC5C	SLC13A1
GADD45GIP1	RBPMS2	GAL	SAA4	GIGYF2	RRP15	GRPEL1	SLC28A1
GALNT5	RECK	GALNT3	SCGB3A1	GIPC2	RTN4IP1	GRSF1	SLC34A3
GAMT	REXO2	GAPDH	SCRIB	GKN1	S100A14	GSAP	SLC9A3R2
GAS6	RILPL2	GBP2	SDK2	GLB1	S100G	GSTA3	SLIRP
GASK1A	RIPK4	GC	SELENOP	GLP1R	SAFB2	GTF2IRD1	SLK
GATD3	RNASE10	GCHFR	SELL	GLT8D2	SAG	GUCY2C	SLMAP
GBP6	RNF149	GHR	SEMA3G	GNAS	SATB1	H2AP	SMAD2
GCLM	RNF5	GIMAP7	SEMA6C	GNGT1	SCIN	HAGH	SMAD3
GDF15	ROBO4	GIPR	SERPINA1	GNLY	SCN2A	HAO1	SMC3
GDF2	RPL14	GIT1	SERPINA3	GOLGA3	SCN2B	HAVCR1	SMNDC1
GET3	RPS10	GLA	SERPINA4	GOLM2	SCN3A	HBEGF	SMPDL3B
GGACT	RTKN2	GLI2	SERPINA5	GP6	SCN3B	HBQ1	SNX18
GGCT	RYR1	GLOD4	SERPINA6	GPC5	SCRIB	HDDC2	SNX2
GGH	SARG	GLRX5	SERPINA7	GPKOW	SCT	HDGF	SPINT3
GH1	SART1	GMPR	SERPINC1	GPR101	SEPTIN3	HGS	SPRING1
GHRL	SAT1	GMPR2	SERPIND1	GPR158	SEPTIN8	HMBS	SPRR1B
GIP	SBSN	GNPDA2	SERPINF1	GRIK2	SEZ6	HMMR	SSH3
GLO1	SCGB2A2	GOPC	SERPINF2	GRIN2B	SH3BGRL2	HPGDS	SSNA1
GLRX	SCN4B	GP5	SERPING1	GRN	SH3GLB2	HRAS	STAM
GM2A	SCPEP1	GPI	SERPINI1	GSTP1	SLA2	HS3ST3B1	STAU1
GMFG	SCRG1	GSN	SFRP4	GSTT2B	SLC1A4	HS6ST1	STOML2
GNPDA1	SCRIB	GSR	SHBG	GTPBP2	SLC44A4	HSPA2	SUGP1
GOT1	SEC31A	GZMA	SHH	GUCA2A	SMS	HSPB6	SUSD4
GP1BA	SEL1L	GZMB	SIRT1	HARS1	SMTN	HTRA2	SWAP70
GP1BB	SERPINE2	HCLS1	SLC9A3R1	HAVCR2	SNAP25	ICOSLG	TAB2
GP2	SGSH	HDAC8	SLITRK1	HDAC9	SNAPIN	ID4	TADA3
GPNMB	SHD	HEG1	SMPD3	HDGFL2	SNRPB2	IDO1	TAGLN3
GPR37	SHISA5	HEXIM1	SNCA	HEPACAM2	SORBS1	IDUA	TAP1
GRAP2	SIGLEC8	HGF	SNX15	HHEX	SOWAHA	IFI30	TARS1
GRHPR	SIL1	HGFAC	SOD3	HIP1R	SOX2	IFIT1	TCP11
GRK5	SKIV2L	HIF1A	SPART	HJV	SOX9	IFIT3	TDP1
GRP	SLC12A2	HLA-DRA	SPINK2	HLA-A	SPACA5_SPACA5B	IFNAR1	TET2
GSTA1	SLC4A1	HLA-E	SPRED2	HMOX2	SPAG1	IGF1R	TEX33
GSTM4	SLC51B	HMCN2	SSBP1	HNF1A	SPRR3	IGLON5	TG
GUK1	SLURP1	HPCAL1	ST13	HNMT	SPTBN2	IGSF3	TGFB2
GUSB	SNED1	HRG	ST8SIA1	HNRNPUL1	SPTLC1	IKZF2	THAP12
GYS1	SNU13	HS6ST2	STAT2	HSD17B14	STEAP4	IL12A_IL12B	THTPA
GZMH	SNX5	HSD11B1	STX5	HSP90B1	STX1B	IL13RA1	TIGIT
HADH	SPESP1	HSPA1A	STX7	HTR1A	STX3	IL22	TK1
HBZ	SPINK8	ICA1	SUMF1	HTR1B	STXBP1	IL25	TLR2
HCG22	SRPX	ICAM4	SUSD5	IDI2	SUOX	IL2RG	TMED1
HEBP1	STAB2	IDO1	SYAP1	IDO1	SV2A	IL3	TMED8
HEPH	SYTL4	IDS	TBCA	IFNGR2	SYNGAP1	IL6	TMEM106A
HIP1	TALDO1	IFNG	TCN1	IFNL1	SYT1	IL9	TMOD4
HK2	TCOF1	IFNGR1	TERF1	IFNL2	TARM1	IMMT	TNFAIP2
HMGCL	TCTN3	IFNLR1	TF	IFT20	TAX1BP1	INPP1	TNPO1
HMGCS1	TEF	IGFL4	TGFBR1	IGBP1	TBR1	INPPL1	TOP1
HMOX1	THRAP3	IGLC2	TGOLN2	IGDCC3	TDO2	INSL4	TOP1MT
HNRNPK	TIMM10	IKBKG	THSD1	IGF2R	TEX101	INSL5	TPPP2
HPSE	TIMP2	IL10	TLR1	IGFBP4	TFAP2A	IQGAP2	TPRKB
HRC	TMED10	IL10RA	TLR4	IL13RA2	TIMM8A	IST1	TRDMT1
HS1BP3	TMED4	IL10RB	TNFAIP8L2	IL17RA	TJP3	ITGAV	TRIM24
HSBP1	TMEM132A	IL11	TNFRSF17	IL18RAP	TMCO5A	ITGAX	TRIM25
HSD17B3	TNFSF8	IL12B	TNFSF9	IL1R1	TMEM25	ITGB1BP1	TRIM26
HSDL2	TNN	IL12RB1	TOP2B	IL1RAP	TMPRSS11B	ITGB5	TRIM58
HSPB1	TOMM20	IL12RB2	TP53BP1	IL34	TMPRSS11D	ITGB7	TSPAN8
HSPG2	TOR1AIP1	IL13	TP53I3	IL6	TNIP1	ITIH5	TXK
HYAL1	TPK1	IL15	TPD52L2	IL7R	TOM1L2	IZUMO1	UBE2B
HYOU1	TPM3	IL15RA	TPSG1	ILKAP	TP73	JMJD1C	UFD1
ICAM1	TPR	IL16	TRAF3	IMPA1	TPBGL	JPT2	UNC79
ICAM2	TRAF3IP2	IL17A	TREML1	IMPACT	TPSD1	KAZALD1	UNG
ICAM3	TREH	IL17C	TSC1	IMPG1	TRIM40	KAZN	UPK3BL1
ICAM5	TRPV3	IL17D	TSPYL1	ING1	TSC22D1	KDR	USP25
IDO1	TSNAX	IL17F	TTR	INHBC	TSPAN7	KHDC3L	VCPKMT
IFNW1	TSPAN15	IL17RB	TXN	INPP5J	TTF2	KIAA1549	VPS28
IGDCC4	TTN	IL18	TYRP1	INSL3	TUBB3	KIAA1549L	VPS4B
IGF2BP3	TWF2	IL18R1	UBE2Z	IPCEF1	TXNDC9	KIAA2013	VSIG10
IGFBP1	UBE2L6	IL1A	UBXN1	ISLR2	TXNL1	KIFBP	VSIG2
IGFBP2	UBQLN3	IL1B	UNC5D	ITGA5	UPK3A	KIR2DL2	VSTM2B
IGFBP3	UGDH	IL1R2	UROD	ITGAM	UROS	KIR2DL3	VWA5A
IGFBP6	UHRF2	IL1RL2	VAMP8	ITPRIP	USP28	KIR2DS4	WDR46
IGFBP7	UPB1	IL1RN	VASP	IVD	VAV3	KIR3DL1	WFDC1
IGFBPL1	USP47	IL2	VEGFB	JAM2	VGF	KIR3DL2	YARS1
IGHMBP2	VIPR1	IL20	VNN1	KCNC4	VSNL1	KLK1	YJU2
IGSF21	VIT	IL20RA	VTI1A	KCNH2	VWC2L	KLK10	ZFYVE19
IGSF8	VSIG10L	IL20RB	WASL	KCNIP4	WASHC3	KLK11	ZNF75D
IGSF9	YOD1	IL21R	XIAP	KCTD5	YAP1	KLK12	ZNF830
IL18BP	ZCCHC8	IL22RA1	YWHAQ	KEL	ZHX2	KLK13	ZNRD2
IL19	ZP3	IL24	YY1	KIAA0319	ZPR1	KLK14	ZNRF4
IL1RL1		IL2RB	ZBP1	KIF20B		KLK15	ZP4
IL2RA		IL31	ZNF174	KIRREL1		KLK4
IL6		IL31RA		KIRREL2		KLK6
IL6R		IL32		KLB		KLK8
IL6ST		IL33		KLF4		KRT18
INPP5D		IL36A		KLHL41		L1CAM
IRAG2		IL36G		KLRC1		LACRT
ISM2		IL3RA		KLRK1		LAG3
ITGB1		IL4		KRT14		LAMTOR5
ITGB1BP2		IL4R		KRT5		LARP1
ITGB2		IL5		KRT8		LAT2
ITGBL1		IL5RA		LAIR2		LEFTY2
ITIH3		IL6		LAMP2		LGALS7_LGALS7B
ITPA		IL7		LAYN		LHB
ITPR1		INHBB		LBR		LMNB1
KHK		INSR		LCN15		LMOD1
KIF1C		IRAK1		LDLRAP1		LPCAT2
KIF22		IRAK4		LELP1		LRIG1
KIT		ISM1		LEO1		LRP1
KITLG		ITGA11		LETM1		LRRC25
KLK3		ITGA2		LGALS8		LRRC37A2
KRT17		ITGA6		LIF		LRRFIP1
KRT6C		ITGAL		LILRA2		LSM1
KYAT1		ITGB6		LMNB2		LSM8
L3HYPDH		ITIH1		LMOD1		LTA4H
LACTB2		ITIH4		LMOD2		LTB
LAMA1		ITM2A		LPO		LTBP3
LAMB1		JAM3		LRFN2		LUZP2
LAMP1		JCHAIN		LRP2		LYAR
LBP		JUN		LRP2BP		LYN
LCN2		KDM3A		LRPAP1		LYPD3
LCP1		KLK7		LRRC38		LYPD8
LDLR		KLKB1		LRTM1		LYZL2
LECT2		KLRB1		LRTM2		MAEA
LEP		KLRD1		LXN		MAGEA3
LEPR		KLRF1		LY96		MAGED1
LGALS1		KRT19		LYPD1		MAMDC4
LGALS3		KYNU		LYPLA2		MANEAL
LILRA3		LAIR1		LYSMD3		MANSC1
LILRA4		LAMA4		MAD1L1		MAP2K1
LILRA5		LAMP3		MAG		MAP3K5
LILRA6		LAP3		MAP1LC3A		MAPK13
LILRB1		LAT		MAP2		MAPKAPK2
LILRB2		LATS1		MAP4K5		MAPRE3
LILRB5		LCAT		MAPT		MAVS
LIPF		LEG1		MASP1		MCTS1
LMOD1		LGALS3BP		MATN3		MDK
LONP1		LGALS4		MAX		MED18
LPL		LGALS9		MCEE		MEP1A
LPP		LGMN		MDGA1		METAP2
LRCH4		LHPP		MDM1		MIA
LRP11		LIFR		MESD		MINDY1
LRRC59		LILRB4		METAP1		MLLT1
LTBP2		LMOD1		MFAP3L		MME
M6PR		LPA		MFGE8		MMP12
MAMDC2		LRG1		MICALL2		MNAT1
MAN1A2		LRIG3		MIF		MOG
MAN2B2		LRRN1		MINK1		MORF4L1
MANSC4		LSP1		MITD1		MORF4L2
MAP1LC3B2		LTA		MMP13		MORN4
MARCO		LTBR		MMP3		MPI
MB		LTO1		MMP8		MPRIP
MCAM		LY6D		MMP9		MRPL52
MCFD2		LY75		MN1		MSLN
MECR		LY9		MORC3		MSRA
MED21		LYVE1		MPO		MTHFSD
MEGF11		LZTFL1		MRI1		MTIF3
MEGF9		MANF		MRPL28		MTSS1
MELTF		MAP2K6		MRPL46		MTSS2
MEP1B		MAPK9		MRPL58		MTUS1
MET		MARS1		MSLNL		MUC16
MFAP3		MATN2		MSR1		MUCL3
MFAP5		MBL2		MTHFD2		MYH7B
MMP15		MCEMP1		MUC13		MZT1
MMP7		MDH1		MYCBP2		NACC1
MMUT		MEGF10		MYL6B		NAMPT
MNDA		MENT		MYLPF		NAP1L4
MPHOSPH8		MEPE		MYO6		NBL1
MRPL24		MERTK		MYOC		NCR3LG1
MSMB		METAP1D		MYOM1		NCS1
MSTN		MFAP4		NAA80		NDST1
MTPN		MGLL		NAAA		NDUFB7
MTR		MGMT		NAPRT		NDUFS6
MUC2		MICB_MICA		NARS1		NECTIN4
MYBPC1		MILR1		NCAM2		NEK7
MYBPC2		MKI67		NCAN		NELL1
MYDGF		MLN		NDRG1		NENF
MYH4		MMP1		NEFL		NFKB2
MYH9		MMP10		NEO1		NFKBIE
MYL1		MOCS2		NFIC		NFU1
MYL3		MPIG6B		NGF		NINJ1
MYL4		MRC1		NGRN		NMI
MYOM2		MRPS16		NID2		NMRK2
NAA10		MST1		NLGN1		NPTN
NADK		MTDH		NLGN2		NPY
NAGK		MVK		NMNAT1		NT5E
NCAM1		MXRA8		NMT1		NTF4
NEB		MYO9B		NOMO1		NUBP1
NECAP2		MYOM3		NOS1		NUCB2
NECTIN2		MZB1		NOS3		NUDT16
NFE2		NAGA		NPM1		NUDT2
NFKB1		NAGPA		NPTX1		OFD1
NFX1		NBN		NRN1		OGA
NFYA		NCF2		NRP2		OGFR
NGFR		NCK2		NRXN3		OGT
NID1		NCLN		NSFL1C		OMG
NIT1		NCR1		NT5C1A		OPTC
NIT2		NDUFA5		NTRK3		OTUD6B
NOP56		NECTIN1		NUDT5		P4HB
NOS2		NEDD4L		NXPH1		PAFAH2
NOTCH1		NEDD9		OBP2B		PAIP2B
NOTCH2		NELL2		OCLN		PALM
NOTCH3		NEXN		ODAM		PARD3
NPC2		NFASC		OGN		PBK
NPDC1		NFAT5		OMP		PBXIP1
NPL		NFATC1		OPHN1		PCDH7
NPPB		NFATC3		OSBPL2		PCDH9
NPR1		NHLRC3		OSTN		PCDHB15
NPTX2		NME1		OTOA		PCNA
NPTXR		NME3		OTUD7B		PCSK7
NRCAM		NPHS1		OXT		PCYT2
NRP1		NPHS2		PADI4		PDCD1
NT5C		NPPC		PAEP		PDCD1LG2
NTproBNP		NRGN		PAFAH1B3		PDCL2
NTRK2		NRTN		PAK4		PDE1C
NUDT10		NT5C3A		PALM2		PDGFC
NUDT15		NTF3		PAMR1		PDIA2
NUP50		NUB1		PARK7		PDIA5
NXPE4		NUDC		PBLD		PDP1
OLR1		NUMB		PCARE		PDXDC1
OPLAH		NXPH3		PCBP2		PFDN4
OSMR		OLFM4		PCDH12		PFKFB2
OXCT1		OMD		PDCD5		PHLDB1
PACS2		ORM1		PDLIM5		PHLDB2
PAG1		OSCAR		PDRG1		PITHD1
PAGR1		OSM		PEBP1		PKN3
PALM3		PADI2		PECAM1		PLA2G15
PAM		PALLD		PFDN2		PLXDC1
PCDH17		PAPPA		PFDN6		PODXL
PCOLCE		PARP1		PGM2		PODXL2
PCSK9		PAXX		PHACTR2		POLR2F
PDAP1		PCBD1		PHOSPHO1		PPIE
PDCD6		PCDH1		PIBF1		PPM1A
PDE4D		PDE5A		PIGR		PPME1
PDGFA		PDGFB		PIK3IP1		PPP1CC
PDGFRA		PDIA3		PILRA		PPP1R12A
PDGFRB		PDLIM7		PLA2G10		PPP1R12B
PDIA4		PDZK1		PLA2G7		PPP2R5A
PDZD2		PENK		PLAU		PPY
PEAR1		PEPD		PLB1		PQBP1
PECR		PER3		PLCB2		PRAME
PGD		PF4		PLEKHO1		PRC1
PGLYRP1		PGA4		PLIN1		PRDX6
PGLYRP4		PGF		PLSCR3		PRKRA
PI3		PGLYRP2		PLXDC2		PRTG
PILRB		PGR		PMS1		PRUNE2
PKD1		PHYKPL		PMVK		PSAPL1
PKD2		PI16		PNLIPRP1		PSCA
PLA2G1B		PIK3AP1		PNMA2		PSMA1
PLA2G2A		PIKFYVE		PPCDC		PSMC3
PLAT		PINLYP		PPP1R14A		PSMD9
PLIN3		PKLR		PPP1R14D		PSRC1
PLPBP		PLA2G4A		PPP3R1		PTPRH
PLTP		PLAUR		PPT1		PTPRK
PLXNB2		PLCB1		PRDX1		PTTG1
PLXNB3		PLG		PRKAG3		PVALB
PM20D1		PLXNA4		PRKAR2A		PXDNL
PMCH		PNLIP		PRL		RAB2B
PMM2		PNLIPRP2		PRND		RAB44
PNMA1		PNPT1		PRSS53		RABEPK
POMC		POF1B		PRTFDC1		RAD23B
PON2		POLR2A		PSG1		RAD51
POSTN		PON1		PSMD1		RALY
PPIB		PON3		PSMD5		RANGAP1
PPIF		PPBP		PSME1		RAPGEF2
PPM1F		PPL		PSME2		RARRES1
PPP1R2		PPM1B		PTEN		RASGRF1
PRAP1		PPP1R9B		PTH		RASSF2
PRCP		PRDX2		PTK7		RBM25
PRG2		PRDX3		PTPN1		RBP2
PRG3		PRDX5		PTPRN2		RBP5
PRKAR1A		PREB		PTPRR		RBP7
PRKD2		PRELP		PTS		RCC1
PROC		PRKAB1		PVR		REG3G
PROCR		PRKCQ		PXN		REST
PRRT3		PRKG1		RAB3GAP1		RET
PRSS2		PROK1		RAB6B		RFC4
PRSS27		PROS1		RAC3		RGL2
PRTN3		PRR4		RANBP2		RILP
PSAP		PRR5		RASA1		RNF4
PTGDS		PRSS22		RBFOX3		RNF41
PTGR1		PRSS8		RBKS		RNF43
PTN		PSIP1		RBM17		RP2
PTPRB		PSMG3		RBP1		RPE
PTPRC		PSMG4		REEP4		RRM2
PTPRF		PSPN		RELT		RRM2B
PTPRS		PSTPIP2		RGCC		RSPO3
PTPRZ1		PTGES2		RGMA		RTBDN
PYDC1		PTH1R		RGMB		RTN4R
PYY		PTP4A3		RGS10		RUVBL1
QDPR		PTPN6		RHOC		S100A12
QPCT		PTPN9		RLN1		S100A3
RAB10		PTPRM		RNASEH2A		S100A4
RAB11FIP3		PTRHD1		ROBO2		SAP18
RAB27B		PTX3		RPGR		SAT2
RAB33A		PZP		RRAS		SCAMP3
RAB39B		QSOX1		RRP15		SCG2
RANBP1		RAB37		RSPO1		SCLY
RARRES2		RAB6A		RTN4IP1		SCP2
RBM19		RABEP1		RWDD1		SCRIB
RBPMS2		RABGAP1L		S100A14		SDCCAG8
RCOR1		RALB		S100A16		SDHB
RECK		RAP1A		S100G		SEMA4C
REG1A		RBPMS		SAFB2		SEPTIN7
REG1B		REG4		SAG		SEPTIN9
REG3A		RELB		SATB1		SERPINA9
REN		REPS1		SCARA5		SERPINH1
RETN		RGS8		SCARB1		SERPINI2
REXO2		RICTOR		SCARB2		SEZ6L
RILPL2		RIDA		SCARF2		SEZ6L2
RIPK4		RLN2		SCIN		SF3B4
RNASE10		RNASE1		SCN2A		SFTPA1
RNASE3		RNASE4		SCN2B		SFTPA2
RNASET2		RNASE6		SCN3A		SH2B3
RNF149		RNF168		SCN3B		SH3BP1
RNF5		RNF31		SCRIB		SH3GL3
ROBO4		ROBO1		SCT		SHC1
ROR1		RPA2		SEMA4D		SHPK
RPL14		S100A13		SEPTIN3		SIAE
RPS10		SAA4		SEPTIN8		SIGLEC6
RTKN2		SAMD9L		SERPINB1		SIGLEC9
RYR1		SCG3		SERPINB6		SIRT2
S100A11		SCGB1A1		SERPINB9		SLAMF6
S100P		SCGB3A1		SESTD1		SLAMF8
SARG		SCGB3A2		SETMAR		SLC13A1
SART1		SCGN		SEZ6		SLC28A1
SAT1		SCRIB		SFRP1		SLC34A3
SBSN		SCRN1		SH3BGRL2		SLC9A3R2
SCARF1		SDK2		SH3GLB2		SLIRP
SCGB2A2		SELENOP		SIGLEC15		SLITRK2
SCN4B		SELL		SIGLEC5		SLK
SCPEP1		SELPLG		SIRT5		SLMAP
SCRG1		SEMA3G		SKAP1		SMAD2
SCRIB		SEMA6C		SLA2		SMAD3
SDC1		SERPINA1		SLC16A1		SMAD5
SDC4		SERPINA3		SLC1A4		SMC3
SEC31A		SERPINA4		SLC27A4		SMNDC1
SEL1L		SERPINA5		SLC39A14		SMOC1
SELE		SERPINA6		SLC44A4		SMPDL3B
SELP		SERPINA7		SLIT2		SNAP29
SEMA3F		SERPINB8		SMARCA2		SNX18
SEMA7A		SERPINC1		SMPD1		SNX2
SERPINA11		SERPIND1		SMS		SORCS2
SERPINA12		SERPINF1		SMTN		SORD
SERPINB5		SERPINF2		SNAP25		SPARC
SERPINE1		SERPING1		SNAPIN		SPINK6
SERPINE2		SERPINI1		SNCG		SPINT3
SFTPD		SFRP4		SNRPB2		SPRING1
SGSH		SH2D1A		SOD2		SPRR1B
SHD		SHBG		SORBS1		SRC
SHISA5		SHH		SOWAHA		SRP14
SIGLEC7		SHMT1		SOX2		SSH3
SIGLEC8		SIGLEC1		SOX9		SSNA1
SIL1		SIGLEC10		SPACA5_SPACA5B		ST3GAL1
SIRPA		SIRPB1		SPAG1		STAM
SKIV2L		SIRT1		SPINK1		STAT5B
SLC12A2		SIT1		SPINK5		STAU1
SLC4A1		SKAP2		SPINT1		STOML2
SLC51B		SLAMF1		SPOCK1		STX16
SLITRK6		SLAMF7		SPRR3		STX4
SLURP1		SLC39A5		SPTBN2		STX6
SNAP23		SLC9A3R1		SPTLC1		STXBP3
SNED1		SLITRK1		SSB		SUGP1
SNU13		SMOC2		STAMBP		SUGT1
SNX5		SMPD3		STC1		SUSD4
SNX9		SMPDL3A		STC2		SWAP70
SOD1		SNCA		STEAP4		TAB2
SORT1		SNX15		STIP1		TACC3
SOST		SOD3		STK24		TACSTD2
SPARCL1		SPART		STX1B		TADA3
SPESP1		SPINK2		STX3		TAFA5
SPINK8		SPINK4		STXBP1		TAGLN3
SPON2		SPINT2		SULT1A1		TAP1
SPP1		SPON1		SUMF2		TARS1
SRPX		SPRED2		SUOX		TBC1D23
SSC4D		SPRY2		SUSD2		TBL1X
SSC5D		SRPK2		SV2A		TCP11
ST6GAL1		SSBP1		SYNGAP1		TDP1
STAB2		ST13		SYT1		TEK
STK11		ST8SIA1		TARBP2		TET2
STK4		STAT2		TARM1		TEX33
SUSD1		STX5		TAX1BP1		TFPI2
SYTL4		STX7		TBC1D17		TG
TALDO1		STX8		TBCB		TGFB2
TCL1B		SULT2A1		TBCC		TGFBR2
TCN2		SUMF1		TBR1		THAP12
TCOF1		SUSD5		TCL1A		THTPA
TCTN3		SYAP1		TDGF1		TIGIT
TEF		TANK		TDO2		TJAP1
TFF3		TBC1D5		TDRKH		TK1
TFPI		TBCA		TEX101		TLR2
TFRC		TCN1		TFAP2A		TMED1
TGFBI		TERF1		TFF1		TMED8
TGFBR3		TF		THBS2		TMEM106A
TGM2		TFF2		THY1		TMOD4
THBD		TGFA		TIGAR		TMPRSS15
THBS4		TGFB1		TIMM8A		TNF
THOP1		TGFBR1		TIMP4		TNFAIP2
THPO		TGOLN2		TJP3		TNFRSF12A
THRAP3		THSD1		TMCO5A		TNFRSF19
TIA1		TIMP3		TMEM25		TNPO1
TIE1		TLR1		TMPRSS11B		TOP1
TIMD4		TLR3		TMPRSS11D		TOP1MT
TIMM10		TLR4		TMPRSS5		TP53
TIMP1		TNF		TMSB10		TPMT
TIMP2		TNFAIP8		TNF		TPPP2
TINAGL1		TNFAIP8L2		TNFRSF10A		TPRKB
TMED10		TNFRSF11A		TNFRSF10B		TRDMT1
TMED4		TNFRSF11B		TNFRSF1A		TRIAP1
TMEM132A		TNFRSF13B		TNFRSF1B		TRIM24
TNC		TNFRSF13C		TNFRSF21		TRIM25
TNF		TNFRSF14		TNFRSF6B		TRIM26
TNFRSF10C		TNFRSF17		TNFRSF8		TRIM58
TNFSF13B		TNFRSF4		TNFRSF9		TSPAN8
TNFSF8		TNFSF10		TNFSF14		TXK
TNN		TNFSF11		TNIP1		TXNDC15
TNNI3		TNFSF12		TNR		UBAC1
TOMM20		TNFSF13		TNXB		UBE2B
TOR1AIP1		TNFSF9		TOM1L2		UFD1
TP53INP1		TOP2B		TP73		UNC79
TPK1		TP53BP1		TPBGL		UNG
TPM3		TP53I3		TPPP3		UPK3BL1
TPR		TPD52L2		TPSD1		USO1
TRAF3IP2		TPP1		TREML2		USP25
TREH		TPSAB1		TRIM40		UXS1
TRPV3		TPSG1		TSC22D1		VAT1
TSHB		TPT1		TSPAN7		VCPKMT
TSLP		TRAF2		TST		VEGFC
TSNAX		TRAF3		TTF2		VMO1
TSPAN1		TREM2		TUBB3		VNN2
TSPAN15		TREML1		TXLNA		VPS28
TTN		TRIM21		TXNDC5		VPS37A
TWF2		TRIM5		TXNDC9		VPS4B
TYMP		TSC1		TXNL1		VPS53
TYRO3		TSPYL1		TXNRD1		VSIG10
UBE2L6		TTR		ULBP2		VSIG2
UBQLN3		TXN		UPK3A		VSTM2B
UGDH		TYRP1		UROS		VTCN1
UHRF2		UBE2Z		USP28		VWA1
UMOD		UBXN1		VAV3		VWA5A
UPB1		UNC5D		VCAN		WDR46
USP47		UROD		VGF		WFDC1
USP8		VAMP8		VSIG4		WFDC12
VAMP5		VASH1		VSNL1		WFDC2
VASN		VASP		VSTM1		WIF1
VCAM1		VEGFA		VTA1		XCL1
VIM		VEGFB		VWC2		XPNPEP2
VIPR1		VEGFD		VWC2L		YARS1
VIT		VNN1		WARS		YES1
VSIG10L		VTI1A		WASF3		YJU2
VSIR		WAS		WASHC3		ZBTB16
VSTM2L		WASL		WFIKKN1		ZFYVE19
VWF		WFIKKN2		WWP2		ZNF75D
WASF1		WNT9A		XRCC4		ZNF830
XG		XIAP		YAP1		ZNRD2
YOD1		YTHDF3		ZHX2		ZNRF4
ZBTB17		YWHAQ		ZPR1		ZP4
ZCCHC8		YY1
ZP3		ZBP1
		ZNF174

## Sheet: ST2
	Training R²	OOB R²	Training RMSE	OOB RMSE
Conventional	0.9487	0.7618	2.9224	6.2996
All-organ	0.9261	0.7073	3.5083	6.9829
Organismal	0.9377	0.7333	3.2217	6.6646
Artery	0.8586	0.6592	4.8524	7.5342
Brain	0.8886	0.689	4.3071	7.1973
Intestine	0.4374	0.1835	9.6809	11.6624
pancreas	0.3545	0.0546	10.3695	12.5489
Liver	0.53	0.1338	8.8484	12.0117
Lung	0.3589	0.0693	10.3339	12.4514

## Sheet: ST3
GWAS ID	Year	Trait	Consortium	Sample size	Number of SNPs	Population	Author	PMID
ebi-a-GCST90018793	2021	Angina pectoris	-	470931	24170313	European	Sakaue S	34594039
ebi-a-GCST90029019	2018	Cardiovascular disease	-	477807	11973400	European	Loh PR	29892013
finn-b-I9_CVD	2021	Cardiovascular diseases	FinnGen project	218792	16380466	European	-	-
finn-b-FG_CVD	2021	Cardiovascular diseases (excluding rheumatic etc)	FinnGen project	218792	16380466	European	-	-
finn-b-CHIRHEP_NAS	2021	Chirrosis of liver, NAS	FinnGen project	217334	16380465	European	-	-
ebi-a-GCST003116	2015	Coronary artery disease	-	141217	8597751	European	Nikpay M	26343387
ebi-a-GCST90013864	2021	Coronary artery disease (Firth correction)	-	352063	11027870	European	Mbatchou J	34017140
ebi-a-GCST90013868	2021	Coronary artery disease (SPA correction)	-	352063	11027841	European	Mbatchou J	34017140
ukb-a-306	2017	Diabetes diagnosed by doctor	Neale Lab	336473	10894596	European	Neale	-
finn-b-E4_DIABETES	2021	Diabetes mellitus	FinnGen project	218792	16380466	European	-	-
ukb-b-4929	2018	Diagnoses - secondary ICD10: I73.9 Peripheral vascular disease, unspecified	MRC-IEU	463010	9851867	European	Ben Elsworth	-
finn-b-K11_FIBROCHIRLIV	2021	Fibrosis and chirrhosis of liver	FinnGen project	214403	16380458	European	-	-
finn-b-I9_CVD_HARD	2021	Hard cardiovascular diseases	FinnGen project	218792	16380466	European	-	-
ukb-d-I9_STR_EXH	2018	Ischaemic Stroke, excluding all haemorrhages	-	361194	11321390	European	Neale lab	-
ebi-a-GCST005843	2018	Ischemic stroke	-	440328	7537579	European	Malik R	29531354
ukb-d-I9_CHD	2018	Major coronary heart disease event	-	361194	13295130	European	Neale lab	-
ebi-a-GCST90026416	2021	Mild age-related type 2 diabetes	-	5605	5377257	European	Mansour Aly D	34737425
ebi-a-GCST90026415	2021	Mild obesity-related type 2 diabetes	-	4118	5379722	European	Mansour Aly D	34737425
ebi-a-GCST011364	2021	Myocardial infarction	-	395795	10290368	European	Hartiala JA	33532862
ukb-d-I9_MI_STRICT	2018	Myocardial infarction, strict	-	361194	12640541	European	Neale lab	-
ukb-a-63	2017	Non-cancer illness code self-reported: heart attack/myocardial infarction	Neale Lab	337159	10894596	European	Neale lab	-
ukb-a-75	2017	Non-cancer illness code self-reported: type 2 diabetes	Neale Lab	337159	10894596	European	Neale	-
ukb-b-15829	2018	Non-cancer illness code, self-reported: heart attack/myocardial infarction	MRC-IEU	462933	9851867	European	Ben Elsworth	-
ukb-b-6358	2018	Non-cancer illness code, self-reported: stroke	MRC-IEU	462933	9851867	European	Ben Elsworth	-
ukb-b-13806	2018	Non-cancer illness code, self-reported: type 2 diabetes	MRC-IEU	462933	9851867	European	Ben Elsworth	-
ebi-a-GCST90054782	2021	Nonalcoholic fatty liver disease	-	377998	9097254	European	Fairfield CJ	34535985
ebi-a-GCST90018890	2021	Peripheral artery disease	-	483078	24186090	European	Sakaue S	34594039
ebi-a-GCST90026412	2021	Severe autoimmune type 2 diabetes	-	3196	5376535	European	Mansour Aly D	34737425
ebi-a-GCST90026413	2021	Severe insulin-deficient type 2 diabetes	-	3937	5377931	European	Mansour Aly D	34737425
ebi-a-GCST90026414	2021	Severe insulin-resistant type 2 diabetes	-	3874	5376977	European	Mansour Aly D	34737425
ebi-a-GCST005838	2018	Stroke	-	446696	7633440	European	Malik R	29531354
finn-b-I9_STR	2021	Stroke, excluding SAH	FinnGen project	212884	16380445	European	-	-
finn-b-I9_STR_SAH	2021	Stroke, including SAH	FinnGen project	212947	16380445	European	-	-
ebi-a-GCST005536	2015	Type 1 diabetes	-	29652	101101	European	Onengut-Gumuscu S	25751624
ebi-a-GCST010681	2020	Type 1 diabetes	-	24840	12783129	European	Forgetta V	32005708
ebi-a-GCST90013891	2021	Type 1 diabetes (Firth correction)	-	407746	11039126	European	Mbatchou J	34017140
ebi-a-GCST90013941	2021	Type 1 diabetes (SPA correction)	-	407746	11035542	European	Mbatchou J	34017140
finn-b-E4_DM1COMA	2021	Type 1 diabetes with coma	FinnGen project	184423	16380335	European	-	-
finn-b-E4_DM1_STRICT	2021	Type 1 diabetes, strict (exclude DM2)	FinnGen project	186323	16380237	European	-	-
finn-b-T1D_STRICT	2021	Type 1 diabetes, strict definition	FinnGen project	185115	16380230	European	-	-
finn-b-T1D_STRICT1	2021	Type 1 diabetes, strict definition, subgroup 1	FinnGen project	183034	16380214	European	-	-
finn-b-T1D_STRICT2	2021	Type 1 diabetes, strict definition, subgroup 2	FinnGen project	180819	16380313	European	-	-
finn-b-T1D_WIDE	2021	Type 1 diabetes, wide definition	FinnGen project	189302	16380061	European	-	-
finn-b-T1D_WIDE1	2021	Type 1 diabetes, wide definition, subgroup 1	FinnGen project	185571	16379910	European	-	-
finn-b-T1D_WIDE2	2021	Type 1 diabetes, wide definition, subgroup 2	FinnGen project	181041	16380313	European	-	-
ebi-a-GCST007516	2018	Type 2 diabetes (adjusted for BMI)	-	298957	190208	European	Mahajan A	29632382
ebi-a-GCST90013892	2021	Type 2 diabetes (Firth correction)	-	406831	11039026	European	Mbatchou J	34017140
ebi-a-GCST90013942	2021	Type 2 diabetes (SPA correction)	-	406831	11038957	European	Mbatchou J	34017140
finn-b-E4_DM2COMA	2021	Type 2 diabetes with coma	FinnGen project	185432	16380337	European	-	-
finn-b-E4_DM2KETO	2021	Type 2 diabetes with ketoacidosis	FinnGen project	183530	16380334	European	-	-
finn-b-E4_DM2NEU	2021	Type 2 diabetes with neurological complications	FinnGen project	184096	16380335	European	-	-
finn-b-E4_DM2OPTH	2021	Type 2 diabetes with ophthalmic complications	FinnGen project	185304	16380340	European	-	-
finn-b-E4_DM2NASCOMP	2021	Type 2 diabetes with other specified/multiple/unspecified complications	FinnGen project	207318	16380420	European	-	-
finn-b-E4_DM2PERIPH	2021	Type 2 diabetes with peripheral circulatory complications	FinnGen project	184234	16380336	European	-	-
finn-b-E4_DM2REN	2021	Type 2 diabetes with renal complications	FinnGen project	184481	16380337	European	-	-
finn-b-E4_DM2NOCOMP	2021	Type 2 diabetes without complications	FinnGen project	197807	16380373	European	-	-
finn-b-T2D	2021	Type 2 diabetes, definitions combined	FinnGen project	211766	16380433	European	-	-
finn-b-T2D_INCLAVO	2021	Type 2 diabetes, definitions combined, including avohilmo	FinnGen project	209439	16380426	European	-	-
finn-b-E4_DM2_STRICT	2021	Type 2 diabetes, strict (exclude DM1)	FinnGen project	212351	16380434	European	-	-
finn-b-T2D_WIDE	2021	Type 2 diabetes, wide definition	FinnGen project	202046	16380418	European	-	-
ebi-a-GCST005047	2012	Type 2 diabetes	-	69033	2905211	European	Morris AP	22885922
ukb-b-11590	2018	Vascular/heart problems diagnosed by doctor: Heart attack	MRC-IEU	461880	9851867	European	Ben Elsworth	-
ukb-b-8714	2018	Vascular/heart problems diagnosed by doctor: Stroke	MRC-IEU	461880	9851867	European	Ben Elsworth	-
Abbreviation: GWAS, genome wide association study; ID,identity document; PMID,Pubmed unique identifier

## Sheet: ST4
																							MR steiger test
SNP	Chrom	Pos	Effect_allele.exposure	Other_allele.exposure	Effect_allele.outcome	Other_allele.outcome	beta.exposure	beta.outcome	EAF.exposure	EAF.outcome	remove	palindromic	ambiguous	GWAS_ID.outcome	SE.outcome	Sample_size.outcome	Pvalue.outcome	Pvalue.exposure	SE.exposure	Sample_size.exposure	Exposure	mr_keep	rsq.exposure	rsq.outcome	steiger_dir	steiger_pvalue
rs10067080	5	157947408	T	C	T	C	1.24591	-0.019621	0.2757	0.271237	FALSE	FALSE	FALSE	ebi-a-GCST003116	0.0104804	42457	0.0611843	2.89818e-06	0.26634	1331	Intestine_age_gap	TRUE	0.0161989	8.25509e-05	TRUE	1.9893e-05
rs112971931	3	187269749	A	G	A	G	2.66801	0.00711	0.04884	0.038278	FALSE	FALSE	FALSE	ebi-a-GCST003116	0.0335095	42457	0.831968	3.36e-06	0.574076	1331	Intestine_age_gap	TRUE	0.0159923	1.06041e-06	TRUE	6.0257e-06
rs11586128	1	14950102	T	C	T	C	1.2783	-0.00129	0.24	0.241707	FALSE	FALSE	FALSE	ebi-a-GCST003116	0.0108085	42457	0.904997	4.8758e-06	0.279711	1331	Intestine_age_gap	TRUE	0.015472	3.35521e-07	TRUE	7.9681e-06
rs12093040	1	222637341	A	G	A	G	1.1342	0.021723	0.3576	0.351478	FALSE	FALSE	FALSE	ebi-a-GCST003116	0.0127116	42457	0.0874682	9.06501e-06	0.255545	1331	Intestine_age_gap	TRUE	0.0146059	6.87829e-05	TRUE	4.89601e-05
rs1636440	7	101331242	T	C	T	C	-2.25024	0.046958	0.06236	0.062285	FALSE	FALSE	FALSE	ebi-a-GCST003116	0.022084	42457	0.0334757	6.82171e-06	0.500145	1331	Intestine_age_gap	TRUE	0.0150029	0.000106485	TRUE	5.18187e-05
rs2045100	4	69533702	A	T	A	T	1.62623	0.027077	0.1521	0.190461	FALSE	TRUE	FALSE	ebi-a-GCST003116	0.0165831	42457	0.10251	1.07577e-06	0.333431	1331	Intestine_age_gap	TRUE	0.0175841	6.27933e-05	TRUE	6.72133e-06
rs2876456	20	17406244	T	G	T	G	1.177	-0.002088	0.3129	0.324982	FALSE	FALSE	FALSE	ebi-a-GCST003116	0.0098721	42457	0.832493	4.74949e-06	0.257237	1331	Intestine_age_gap	TRUE	0.0155087	1.05369e-06	TRUE	8.3753e-06
rs34820653	6	96030921	G	T	G	T	1.84869	0.024561	0.0879	0.078023	FALSE	FALSE	FALSE	ebi-a-GCST003116	0.0171773	42457	0.15276	8.8599e-06	0.416064	1331	Intestine_age_gap	TRUE	0.0146379	4.8154e-05	TRUE	3.88949e-05
rs34907579	19	16428053	A	G	A	G	1.47606	-0.006934	0.2787	0.270862	FALSE	FALSE	FALSE	ebi-a-GCST003116	0.01118	42457	0.535116	6.08016e-08	0.272515	1331	Intestine_age_gap	TRUE	0.0215982	9.06048e-06	TRUE	1.94831e-07
rs6761377	2	230571420	C	A	C	A	1.10128	-0.003085	0.4346	0.441683	FALSE	FALSE	FALSE	ebi-a-GCST003116	0.0096863	42457	0.750114	5.62658e-06	0.242574	1331	Intestine_age_gap	TRUE	0.015272	2.38927e-06	TRUE	1.07281e-05
rs680321	18	29797958	C	T	C	T	-3.0156	-0.013024	0.4722	0.453466	FALSE	FALSE	FALSE	ebi-a-GCST003116	0.0093887	42457	0.165381	2.01562e-41	0.474051	1331	Intestine_age_gap	TRUE	0.0295492	4.53241e-05	TRUE	2.11365e-09
rs72713577	9	28521742	C	T	C	T	-1.82321	-0.016691	0.1138	0.127781	FALSE	FALSE	FALSE	ebi-a-GCST003116	0.0165027	42457	0.311821	4.4862e-06	0.397431	1331	Intestine_age_gap	TRUE	0.0155884	2.40944e-05	TRUE	1.50678e-05
rs7291273	22	45212829	A	C	A	C	-2.41758	0.00092	0.0556	0.097523	FALSE	FALSE	FALSE	ebi-a-GCST003116	0.0177139	42457	0.958579	4.84997e-06	0.528875	1331	Intestine_age_gap	TRUE	0.0154794	6.35358e-08	TRUE	7.50403e-06
rs73184769	3	175061183	G	A	G	A	2.17169	0.024469	0.1044	0.096739	FALSE	FALSE	FALSE	ebi-a-GCST003116	0.0163376	42457	0.134209	1.32098e-07	0.411624	1331	Intestine_age_gap	TRUE	0.0205148	5.28329e-05	TRUE	8.89968e-07
rs7779453	7	19241659	T	C	T	C	-1.17124	-0.004495	0.4733	0.439796	FALSE	FALSE	FALSE	ebi-a-GCST003116	0.0100003	42457	0.653079	1.91081e-06	0.245924	1331	Intestine_age_gap	TRUE	0.0167811	4.75885e-06	TRUE	4.29508e-06
rs9959124	18	71065525	T	G	T	G	-1.0949	0.003385	0.3937	0.379183	FALSE	FALSE	FALSE	ebi-a-GCST003116	0.009606	42457	0.724549	9.59705e-06	0.247375	1331	Intestine_age_gap	TRUE	0.0145263	2.92484e-06	TRUE	1.82927e-05
rs10067080	5	157950511	T	C	T	C	1.24591	0	0.2757		FALSE	FALSE	FALSE	ebi-a-GCST005047	0.0103075	12171	0.79	2.89818e-06	0.26634	1331	Intestine_age_gap	TRUE	0.0161989	0	TRUE	9.5098e-06
rs11586128	1	14954253	T	C	T	C	1.2783	-0.00995033	0.24		FALSE	FALSE	FALSE	ebi-a-GCST005047	0.0206171	12171	0.56	4.8758e-06	0.279711	1331	Intestine_age_gap	TRUE	0.015472	1.91406e-05	TRUE	2.97864e-05
rs1636440	7	101332999	T	C	T	C	-2.25024	-0.0198026	0.06236		FALSE	FALSE	FALSE	ebi-a-GCST005047	0.0385243	12171	0.67	6.82171e-06	0.500145	1331	Intestine_age_gap	TRUE	0.0150029	2.17125e-05	TRUE	4.1588e-05
rs2045100	4	69577395	A	T	A	T	1.62623	0.0295588	0.1521		FALSE	TRUE	TRUE	ebi-a-GCST005047	0.156588	12171	0.84	1.07577e-06	0.333431	1331	Intestine_age_gap	FALSE	0.0175841	2.9282e-06	TRUE	5.20329e-06
rs2876456	20	17406244	T	G	T	G	1.177	-0.0198026	0.3129		FALSE	FALSE	FALSE	ebi-a-GCST005047	0.00990719	12171	0.22	4.74949e-06	0.257237	1331	Intestine_age_gap	TRUE	0.0155087	0.000328206	TRUE	0.000211627
rs34820653	6	96034050	G	T	G	T	1.84869	0	0.0879		FALSE	FALSE	FALSE	ebi-a-GCST005047	0.0248929	12171	0.87	8.8599e-06	0.416064	1331	Intestine_age_gap	TRUE	0.0146379	0	TRUE	2.58727e-05
rs34907579	19	16428398	A	G	A	G	1.47606	0.0295588	0.2787		FALSE	FALSE	FALSE	ebi-a-GCST005047	0.014648	12171	0.17	6.08016e-08	0.272515	1331	Intestine_age_gap	TRUE	0.0215982	0.000334516	TRUE	7.14121e-06
rs6761377	2	230571420	C	A	C	A	1.10128	0.0487902	0.4346		FALSE	FALSE	FALSE	ebi-a-GCST005047	0.028352	12171	0.16	5.62658e-06	0.242574	1331	Intestine_age_gap	TRUE	0.015272	0.000243297	TRUE	0.000171035
rs680321	18	29797958	C	T	C	T	-3.0156	0	0.4722		FALSE	FALSE	FALSE	ebi-a-GCST005047	0.0103075	12171	0.709999	2.01562e-41	0.474051	1331	Intestine_age_gap	TRUE	0.0295492	0	TRUE	1.88105e-09
rs7291273	22	45213262	A	C	A	C	-2.41758	0	0.0556		FALSE	FALSE	FALSE	ebi-a-GCST005047	0.02617	12171	0.97	4.84997e-06	0.528875	1331	Intestine_age_gap	TRUE	0.0154794	0	TRUE	1.50792e-05
rs7779453	7	19241659	T	C	T	C	-1.17124	-0.0295588	0.4733		FALSE	FALSE	FALSE	ebi-a-GCST005047	0.0202087	12171	0.13	1.91081e-06	0.245924	1331	Intestine_age_gap	TRUE	0.0167811	0.000175778	TRUE	5.14382e-05
rs9959124	18	71065525	T	G	T	G	-1.0949	0.0295588	0.3937		FALSE	FALSE	FALSE	ebi-a-GCST005047	0.0335466	12171	0.42	9.59705e-06	0.247375	1331	Intestine_age_gap	TRUE	0.0145263	6.37961e-05	TRUE	9.06137e-05
rs10067080	5	157947408	T	C	T	C	1.24591	-0.0138	0.2757	0.3167	FALSE	FALSE	FALSE	ebi-a-GCST005838	0.0087	446696	0.1134	2.89818e-06	0.26634	1331	Intestine_age_gap	TRUE	0.0161989	5.63258e-06	TRUE	4.87417e-06
rs112971931	3	187269749	A	G	A	G	2.66801	0.0206	0.04884	0.0485	FALSE	FALSE	FALSE	ebi-a-GCST005838	0.0286	446696	0.4705	3.36e-06	0.574076	1331	Intestine_age_gap	TRUE	0.0159923	1.16143e-06	TRUE	4.49315e-06
rs11586128	1	14950102	T	C	T	C	1.2783	0.0069	0.24	0.2487	FALSE	FALSE	FALSE	ebi-a-GCST005838	0.0093	446696	0.457999	4.8758e-06	0.279711	1331	Intestine_age_gap	TRUE	0.015472	1.23231e-06	TRUE	6.50391e-06
rs12093040	1	222637341	A	G	A	G	1.1342	-0.0186	0.3576	0.346	FALSE	FALSE	FALSE	ebi-a-GCST005838	0.0099	446696	0.0598205	9.06501e-06	0.255545	1331	Intestine_age_gap	TRUE	0.0146059	7.90209e-06	TRUE	1.58206e-05
rs1636440	7	101331242	T	C	T	C	-2.25024	0.0054	0.06236	0.0593	FALSE	FALSE	FALSE	ebi-a-GCST005838	0.0196	446696	0.780899	6.82171e-06	0.500145	1331	Intestine_age_gap	TRUE	0.0150029	1.69928e-07	TRUE	8.02595e-06
rs2045100	4	69549175	A	T	A	T	1.62623	-0.0094	0.1521	0.1821	FALSE	TRUE	FALSE	ebi-a-GCST005838	0.0145	446696	0.5179	1.07577e-06	0.333431	1331	Intestine_age_gap	TRUE	0.0175841	9.40826e-07	TRUE	1.44658e-06
rs2876456	20	17406244	T	G	T	G	1.177	0.0026	0.3129	0.3414	FALSE	FALSE	FALSE	ebi-a-GCST005838	0.0083	446696	0.749501	4.74949e-06	0.257237	1331	Intestine_age_gap	TRUE	0.0155087	2.19675e-07	TRUE	5.67653e-06
rs34820653	6	96030921	G	T	G	T	1.84869	0.0024	0.0879	0.0839	FALSE	FALSE	FALSE	ebi-a-GCST005838	0.0144	446696	0.8665	8.8599e-06	0.416064	1331	Intestine_age_gap	TRUE	0.0146379	6.21852e-08	TRUE	1.00993e-05
rs34907579	19	16428053	A	G	A	G	1.47606	-0.0089	0.2787	0.2982	FALSE	FALSE	FALSE	ebi-a-GCST005838	0.0097	446696	0.3563	6.08016e-08	0.272515	1331	Intestine_age_gap	TRUE	0.0215982	1.88463e-06	TRUE	9.46486e-08
rs6761377	2	230571420	C	A	C	A	1.10128	0.0044	0.4346	0.4674	FALSE	FALSE	FALSE	ebi-a-GCST005838	0.0085	446696	0.6071	5.62658e-06	0.242574	1331	Intestine_age_gap	TRUE	0.015272	5.9987e-07	TRUE	7.06561e-06
rs680321	18	29797958	C	T	C	T	-3.0156	-0.0051	0.4722	0.4582	FALSE	FALSE	FALSE	ebi-a-GCST005838	0.0079	446696	0.519501	2.01562e-41	0.474051	1331	Intestine_age_gap	TRUE	0.0295492	9.32987e-07	TRUE	3.33001e-10
rs72713577	9	28521742	C	T	C	T	-1.82321	-0.0076	0.1138	0.1478	FALSE	FALSE	FALSE	ebi-a-GCST005838	0.0125	446696	0.5443	4.4862e-06	0.397431	1331	Intestine_age_gap	TRUE	0.0155884	8.27555e-07	TRUE	5.79169e-06
rs7291273	22	45212829	A	C	A	C	-2.41758	0.0183	0.0556	0.2144	FALSE	FALSE	FALSE	ebi-a-GCST005838	0.0142	446696	0.1989	4.84997e-06	0.528875	1331	Intestine_age_gap	TRUE	0.0154794	3.71804e-06	TRUE	7.4419e-06
rs73184769	3	175061183	G	A	G	A	2.17169	0.0067	0.1044	0.1082	FALSE	FALSE	FALSE	ebi-a-GCST005838	0.0147	446696	0.6497	1.32098e-07	0.411624	1331	Intestine_age_gap	TRUE	0.0205148	4.65055e-07	TRUE	1.75974e-07
rs7779453	7	19241659	T	C	T	C	-1.17124	0.0109	0.4733	0.4121	FALSE	FALSE	FALSE	ebi-a-GCST005838	0.0089	446696	0.2183	1.91081e-06	0.245924	1331	Intestine_age_gap	TRUE	0.0167811	3.35785e-06	TRUE	2.95845e-06
rs9959124	18	71065525	T	G	T	G	-1.0949	-0.0139	0.3937	0.4126	FALSE	FALSE	FALSE	ebi-a-GCST005838	0.0082	446696	0.0889508	9.59705e-06	0.247375	1331	Intestine_age_gap	TRUE	0.0145263	6.43264e-06	TRUE	1.59777e-05
rs10067080	5	157947408	T	C	T	C	1.24591	-0.0139	0.2757	0.321	FALSE	FALSE	FALSE	ebi-a-GCST005843	0.0093	440328	0.1352	2.89818e-06	0.26634	1331	Intestine_age_gap	TRUE	0.0161989	5.07326e-06	TRUE	4.77509e-06
rs112971931	3	187269749	A	G	A	G	2.66801	0.0324	0.04884	0.0485	FALSE	FALSE	FALSE	ebi-a-GCST005843	0.0304	440328	0.2867	3.36e-06	0.574076	1331	Intestine_age_gap	TRUE	0.0159923	2.57969e-06	TRUE	4.9279e-06
rs11586128	1	14950102	T	C	T	C	1.2783	0.006	0.24	0.2499	FALSE	FALSE	FALSE	ebi-a-GCST005843	0.0098	440328	0.5382	4.8758e-06	0.279711	1331	Intestine_age_gap	TRUE	0.015472	8.51286e-07	TRUE	6.30089e-06
rs12093040	1	222637341	A	G	A	G	1.1342	-0.0216	0.3576	0.347	FALSE	FALSE	FALSE	ebi-a-GCST005843	0.0105	440328	0.0397603	9.06501e-06	0.255545	1331	Intestine_age_gap	TRUE	0.0146059	9.6106e-06	TRUE	1.65984e-05
rs1636440	7	101331242	T	C	T	C	-2.25024	-0.0008	0.06236	0.0593	FALSE	FALSE	FALSE	ebi-a-GCST005843	0.0211	440328	0.9707	6.82171e-06	0.500145	1331	Intestine_age_gap	TRUE	0.0150029	3.26468e-09	TRUE	7.55876e-06
rs2045100	4	69543680	A	T	A	T	1.62623	-0.0005	0.1521	0.2323	FALSE	TRUE	FALSE	ebi-a-GCST005843	0.0177	440328	0.9785	1.07577e-06	0.333431	1331	Intestine_age_gap	TRUE	0.0175841	1.81225e-09	TRUE	1.22149e-06
rs2876456	20	17406244	T	G	T	G	1.177	-0.0041	0.3129	0.3441	FALSE	FALSE	FALSE	ebi-a-GCST005843	0.0088	440328	0.6388	4.74949e-06	0.257237	1331	Intestine_age_gap	TRUE	0.0155087	4.92978e-07	TRUE	5.9123e-06
rs34820653	6	96030921	G	T	G	T	1.84869	0.0023	0.0879	0.0834	FALSE	FALSE	FALSE	ebi-a-GCST005843	0.0154	440328	0.8831	8.8599e-06	0.416064	1331	Intestine_age_gap	TRUE	0.0146379	5.0657e-08	TRUE	1.00625e-05
rs34907579	19	16428053	A	G	A	G	1.47606	-0.0149	0.2787	0.301	FALSE	FALSE	FALSE	ebi-a-GCST005843	0.0104	440328	0.1504	6.08016e-08	0.272515	1331	Intestine_age_gap	TRUE	0.0215982	4.66154e-06	TRUE	1.10843e-07
rs6761377	2	230571420	C	A	C	A	1.10128	0.0052	0.4346	0.4663	FALSE	FALSE	FALSE	ebi-a-GCST005843	0.0086	440328	0.5498	5.62658e-06	0.242574	1331	Intestine_age_gap	TRUE	0.015272	8.303e-07	TRUE	7.23578e-06
rs680321	18	29797958	C	T	C	T	-3.0156	-0.011	0.4722	0.4575	FALSE	FALSE	FALSE	ebi-a-GCST005843	0.0086	440328	0.2003	2.01562e-41	0.474051	1331	Intestine_age_gap	TRUE	0.0295492	3.71546e-06	TRUE	4.17198e-10
rs72713577	9	28521742	C	T	C	T	-1.82321	-0.006	0.1138	0.1479	FALSE	FALSE	FALSE	ebi-a-GCST005843	0.0136	440328	0.6569	4.4862e-06	0.397431	1331	Intestine_age_gap	TRUE	0.0155884	4.42028e-07	TRUE	5.5547e-06
rs7291273	22	45212829	A	C	A	C	-2.41758	0.0152	0.0556	0.2247	FALSE	FALSE	FALSE	ebi-a-GCST005843	0.0147	440328	0.3006	4.84997e-06	0.528875	1331	Intestine_age_gap	TRUE	0.0154794	2.42816e-06	TRUE	6.98952e-06
rs73184769	3	175061183	G	A	G	A	2.17169	0.003	0.1044	0.1072	FALSE	FALSE	FALSE	ebi-a-GCST005843	0.0159	440328	0.8485	1.32098e-07	0.411624	1331	Intestine_age_gap	TRUE	0.0205148	8.08489e-08	TRUE	1.62825e-07
rs7779453	7	19241659	T	C	T	C	-1.17124	0.0101	0.4733	0.4058	FALSE	FALSE	FALSE	ebi-a-GCST005843	0.0094	440328	0.2824	1.91081e-06	0.245924	1331	Intestine_age_gap	TRUE	0.0167811	2.62187e-06	TRUE	2.85003e-06
rs9959124	18	71065525	T	G	T	G	-1.0949	-0.0142	0.3937	0.4147	FALSE	FALSE	FALSE	ebi-a-GCST005843	0.0087	440328	0.1014	9.59705e-06	0.247375	1331	Intestine_age_gap	TRUE	0.0145263	6.05008e-06	TRUE	1.5784e-05
rs34820653	6	96053922	G	T	G	T	1.84869	0.007	0.0879	0.0756	FALSE	FALSE	FALSE	ebi-a-GCST007516	0.0126	298957	0.4969	8.8599e-06	0.416064	1331	Intestine_age_gap	TRUE	0.0146379	1.0324e-06	TRUE	1.16559e-05
rs10067080	5	157947408	T	C	T	C	1.24591	0.0428	0.2757	0.282	FALSE	FALSE	FALSE	ebi-a-GCST010681	0.026	24840	0.1003	2.89818e-06	0.26634	1331	Intestine_age_gap	TRUE	0.0161989	0.000109088	TRUE	3.01042e-05
rs112971931	3	187269749	A	G	A	G	2.66801	0.0624	0.04884	0.0501	FALSE	FALSE	FALSE	ebi-a-GCST010681	0.0608	24840	0.3042	3.36e-06	0.574076	1331	Intestine_age_gap	TRUE	0.0159923	4.2406e-05	TRUE	1.84452e-05
rs11586128	1	14950102	T	C	T	C	1.2783	-0.0382	0.24	0.2735	FALSE	FALSE	FALSE	ebi-a-GCST010681	0.0265	24840	0.1496	4.8758e-06	0.279711	1331	Intestine_age_gap	TRUE	0.015472	8.36531e-05	TRUE	3.87885e-05
rs12093040	1	222637341	A	G	A	G	1.1342	0.0205	0.3576	0.3702	FALSE	FALSE	FALSE	ebi-a-GCST010681	0.0279	24840	0.4622	9.06501e-06	0.255545	1331	Intestine_age_gap	TRUE	0.0146059	2.17357e-05	TRUE	3.37617e-05
rs1636440	7	101331242	T	C	T	C	-2.25024	0.0141	0.06236	0.0581	FALSE	FALSE	FALSE	ebi-a-GCST010681	0.0527	24840	0.7887	6.82171e-06	0.500145	1331	Intestine_age_gap	TRUE	0.0150029	2.88203e-06	TRUE	1.62857e-05
rs2045100	4	69533702	A	T	A	T	1.62623	-0.0081	0.1521	0.1668	FALSE	TRUE	FALSE	ebi-a-GCST010681	0.0344	24840	0.8148	1.07577e-06	0.333431	1331	Intestine_age_gap	TRUE	0.0175841	2.23221e-06	TRUE	2.82747e-06
rs2876456	20	17406244	T	G	T	G	1.177	0.0421	0.3129	0.3091	FALSE	FALSE	FALSE	ebi-a-GCST010681	0.0253	24840	0.0956908	4.74949e-06	0.257237	1331	Intestine_age_gap	TRUE	0.0155087	0.00011147	TRUE	4.70608e-05
rs34820653	6	96030921	G	T	G	T	1.84869	0.0479	0.0879	0.0834	FALSE	FALSE	FALSE	ebi-a-GCST010681	0.0423	24840	0.2569	8.8599e-06	0.416064	1331	Intestine_age_gap	TRUE	0.0146379	5.1624e-05	TRUE	4.87226e-05
rs34907579	19	16428053	A	G	A	G	1.47606	-0.0168	0.2787	0.2897	FALSE	FALSE	FALSE	ebi-a-GCST010681	0.0297	24840	0.571	6.08016e-08	0.272515	1331	Intestine_age_gap	TRUE	0.0215982	1.2882e-05	TRUE	2.91989e-07
rs6761377	2	230571420	C	A	C	A	1.10128	0.0315	0.4346	0.4191	FALSE	FALSE	FALSE	ebi-a-GCST010681	0.0245	24840	0.1981	5.62658e-06	0.242574	1331	Intestine_age_gap	TRUE	0.015272	6.65493e-05	TRUE	3.77916e-05
rs680321	18	29797958	C	T	C	T	-3.0156	0.0011	0.4722	0.4604	FALSE	FALSE	FALSE	ebi-a-GCST010681	0.0234	24840	0.9626	2.01562e-41	0.474051	1331	Intestine_age_gap	TRUE	0.0295492	8.89686e-08	TRUE	7.56174e-10
rs72713577	9	28521742	C	T	C	T	-1.82321	-0.0294	0.1138	0.1621	FALSE	FALSE	FALSE	ebi-a-GCST010681	0.0352	24840	0.4036	4.4862e-06	0.397431	1331	Intestine_age_gap	TRUE	0.0155884	2.80854e-05	TRUE	1.97236e-05
rs7291273	22	45212829	A	C	A	C	-2.41758	0.0319	0.0556	0.0518	FALSE	FALSE	FALSE	ebi-a-GCST010681	0.0559	24840	0.5679	4.84997e-06	0.528875	1331	Intestine_age_gap	TRUE	0.0154794	1.3111e-05	TRUE	1.61902e-05
rs73184769	3	175061183	G	A	G	A	2.17169	-0.116	0.1044	0.1101	FALSE	FALSE	FALSE	ebi-a-GCST010681	0.0398	24840	0.00355803	1.32098e-07	0.411624	1331	Intestine_age_gap	TRUE	0.0205148	0.000341889	TRUE	8.04413e-06
rs7779453	7	19241659	T	C	T	C	-1.17124	0.0055	0.4733	0.4634	FALSE	FALSE	FALSE	ebi-a-GCST010681	0.0256	24840	0.8295	1.91081e-06	0.245924	1331	Intestine_age_gap	TRUE	0.0167811	1.85835e-06	TRUE	4.71789e-06
rs9959124	18	71065525	T	G	T	G	-1.0949	-0.0185	0.3937	0.3858	FALSE	FALSE	FALSE	ebi-a-GCST010681	0.0244	24840	0.4474	9.59705e-06	0.247375	1331	Intestine_age_gap	TRUE	0.0145263	2.31439e-05	TRUE	3.63834e-05
rs10067080	5	157947408	T	C	T	C	1.24591	-0.0129671	0.2757	0.274587	FALSE	FALSE	FALSE	ebi-a-GCST011364	0.0120284	17505	0.28	2.89818e-06	0.26634	1331	Intestine_age_gap	TRUE	0.0161989	6.6394e-05	TRUE	2.55737e-05
rs112971931	3	187269749	A	G	A	G	2.66801	-0.0211565	0.04884	0.041935	FALSE	FALSE	FALSE	ebi-a-GCST011364	0.0267347	17505	0.43	3.36e-06	0.574076	1331	Intestine_age_gap	TRUE	0.0159923	3.57774e-05	TRUE	2.07439e-05
rs11586128	1	14950102	T	C	T	C	1.2783	-0.00781417	0.24	0.26044	FALSE	FALSE	FALSE	ebi-a-GCST011364	0.0122793	17505	0.52	4.8758e-06	0.279711	1331	Intestine_age_gap	TRUE	0.015472	2.31364e-05	TRUE	2.40157e-05
rs12093040	1	222637341	A	G	A	G	1.1342	0.0267481	0.3576	0.362473	FALSE	FALSE	FALSE	ebi-a-GCST011364	0.0111807	17505	0.017	9.06501e-06	0.255545	1331	Intestine_age_gap	TRUE	0.0146059	0.000326884	TRUE	0.00028167
rs1636440	7	101331242	T	C	T	C	-2.25024	-0.0186021	0.06236	0.057217	FALSE	FALSE	FALSE	ebi-a-GCST011364	0.0232828	17505	0.42	6.82171e-06	0.500145	1331	Intestine_age_gap	TRUE	0.0150029	3.64691e-05	TRUE	3.90742e-05
rs2045100	4	69533702	A	T	A	T	1.62623	0.00340314	0.1521	0.161482	FALSE	TRUE	FALSE	ebi-a-GCST011364	0.0148982	17505	0.82	1.07577e-06	0.333431	1331	Intestine_age_gap	TRUE	0.0175841	2.98111e-06	TRUE	3.73199e-06
rs2876456	20	17406244	T	G	T	G	1.177	0.00251831	0.3129	0.309858	FALSE	FALSE	FALSE	ebi-a-GCST011364	0.0116502	17505	0.83	4.74949e-06	0.257237	1331	Intestine_age_gap	TRUE	0.0155087	2.66955e-06	TRUE	1.42028e-05
rs34820653	6	96030921	G	T	G	T	1.84869	0.0321874	0.0879	0.081313	FALSE	FALSE	FALSE	ebi-a-GCST011364	0.0196053	17505	0.1	8.8599e-06	0.416064	1331	Intestine_age_gap	TRUE	0.0146379	0.000153973	TRUE	0.000125253
rs34907579	19	16428053	A	G	A	G	1.47606	-0.00937425	0.2787	0.28159	FALSE	FALSE	FALSE	ebi-a-GCST011364	0.0119811	17505	0.43	6.08016e-08	0.272515	1331	Intestine_age_gap	TRUE	0.0215982	3.49745e-05	TRUE	5.9394e-07
rs6761377	2	230571420	C	A	C	A	1.10128	0.0018322	0.4346	0.416626	FALSE	FALSE	FALSE	ebi-a-GCST011364	0.0110313	17505	0.87	5.62658e-06	0.242574	1331	Intestine_age_gap	TRUE	0.015272	1.57608e-06	TRUE	1.56063e-05
rs680321	18	29797958	C	T	C	T	-3.0156	-0.0230539	0.4722	0.460996	FALSE	FALSE	FALSE	ebi-a-GCST011364	0.010808	17505	0.0329997	2.01562e-41	0.474051	1331	Intestine_age_gap	TRUE	0.0295492	0.00025988	TRUE	3.13911e-08
rs72713577	9	28521742	C	T	C	T	-1.82321	-0.00293832	0.1138	0.148101	FALSE	FALSE	FALSE	ebi-a-GCST011364	0.0153416	17505	0.85	4.4862e-06	0.397431	1331	Intestine_age_gap	TRUE	0.0155884	2.09577e-06	TRUE	1.30869e-05
rs7291273	22	45212829	A	C	A	C	-2.41758	0.0303022	0.0556	0.060136	FALSE	FALSE	FALSE	ebi-a-GCST011364	0.0240746	17505	0.21	4.84997e-06	0.528875	1331	Intestine_age_gap	TRUE	0.0154794	9.05062e-05	TRUE	4.91432e-05
rs73184769	3	175061183	G	A	G	A	2.17169	0.0364001	0.1044	0.101773	FALSE	FALSE	FALSE	ebi-a-GCST011364	0.0180199	17505	0.0430002	1.32098e-07	0.411624	1331	Intestine_age_gap	TRUE	0.0205148	0.00023307	TRUE	5.88274e-06
rs7779453	7	19241659	T	C	T	C	-1.17124	-0.0126307	0.4733	0.452699	FALSE	FALSE	FALSE	ebi-a-GCST011364	0.0108584	17505	0.24	1.91081e-06	0.245924	1331	Intestine_age_gap	TRUE	0.0167811	7.72996e-05	TRUE	1.97202e-05
rs9959124	18	71065525	T	G	T	G	-1.0949	-0.00915277	0.3937	0.37991	FALSE	FALSE	FALSE	ebi-a-GCST011364	0.0111698	17505	0.41	9.59705e-06	0.247375	1331	Intestine_age_gap	TRUE	0.0145263	3.83606e-05	TRUE	5.40215e-05
rs10067080	5	157947408	T	C	T	C	1.24591	0.00786636	0.2757		FALSE	FALSE	FALSE	ebi-a-GCST90013864	0.0100569	352063	0.434106	2.89818e-06	0.26634	1331	Intestine_age_gap	TRUE	0.0161989	1.7378e-06	TRUE	4.09133e-06
rs112971931	3	187269749	A	G	A	G	2.66801	-0.0038563	0.04884		FALSE	FALSE	FALSE	ebi-a-GCST90013864	0.0222703	352063	0.862527	3.36e-06	0.574076	1331	Intestine_age_gap	TRUE	0.0159923	8.5167e-08	TRUE	3.95147e-06
rs11586128	1	14950102	T	C	T	C	1.2783	0.00776759	0.24		FALSE	FALSE	FALSE	ebi-a-GCST90013864	0.0103273	352063	0.451964	4.8758e-06	0.279711	1331	Intestine_age_gap	TRUE	0.015472	1.60687e-06	TRUE	6.73855e-06
rs12093040	1	222637341	A	G	A	G	1.1342	0.0158942	0.3576		FALSE	FALSE	FALSE	ebi-a-GCST90013864	0.00941511	352063	0.0913819	9.06501e-06	0.255545	1331	Intestine_age_gap	TRUE	0.0146059	8.09478e-06	TRUE	1.60339e-05
rs1636440	7	101331242	T	C	T	C	-2.25024	0.00125496	0.06236		FALSE	FALSE	FALSE	ebi-a-GCST90013864	0.019438	352063	0.948523	6.82171e-06	0.500145	1331	Intestine_age_gap	TRUE	0.0150029	1.18396e-08	TRUE	7.68599e-06
rs2045100	4	69533702	A	T	A	T	1.62623	0.00552794	0.1521		FALSE	TRUE	TRUE	ebi-a-GCST90013864	0.0126479	352063	0.662066	1.07577e-06	0.333431	1331	Intestine_age_gap	FALSE	0.0175841	5.4259e-07	TRUE	1.3997e-06
rs2876456	20	17406244	T	G	T	G	1.177	0.00673694	0.3129		FALSE	FALSE	FALSE	ebi-a-GCST90013864	0.00983323	352063	0.493269	4.74949e-06	0.257237	1331	Intestine_age_gap	TRUE	0.0155087	1.33326e-06	TRUE	6.4421e-06
rs34820653	6	96030921	G	T	G	T	1.84869	0.0218311	0.0879		FALSE	FALSE	FALSE	ebi-a-GCST90013864	0.0163215	352063	0.181037	8.8599e-06	0.416064	1331	Intestine_age_gap	TRUE	0.0146379	5.08172e-06	TRUE	1.42254e-05
rs34907579	19	16428053	A	G	A	G	1.47606	-0.0131022	0.2787		FALSE	FALSE	FALSE	ebi-a-GCST90013864	0.0100944	352063	0.194301	6.08016e-08	0.272515	1331	Intestine_age_gap	TRUE	0.0215982	4.78528e-06	TRUE	1.12703e-07
rs6761377	2	230571420	C	A	C	A	1.10128	0.00992689	0.4346		FALSE	FALSE	FALSE	ebi-a-GCST90013864	0.00930213	352063	0.285898	5.62658e-06	0.242574	1331	Intestine_age_gap	TRUE	0.015272	3.23476e-06	TRUE	8.48103e-06
rs680321	18	29797958	C	T	C	T	-3.0156	-0.0109876	0.4722		FALSE	FALSE	FALSE	ebi-a-GCST90013864	0.00911094	352063	0.227827	2.01562e-41	0.474051	1331	Intestine_age_gap	TRUE	0.0295492	4.13104e-06	TRUE	4.33997e-10
rs72713577	9	28521742	C	T	C	T	-1.82321	-0.0116075	0.1138		FALSE	FALSE	FALSE	ebi-a-GCST90013864	0.0129015	352063	0.368279	4.4862e-06	0.397431	1331	Intestine_age_gap	TRUE	0.0155884	2.29921e-06	TRUE	6.48322e-06
rs7291273	22	45212829	A	C	A	C	-2.41758	0.0165364	0.0556		FALSE	FALSE	FALSE	ebi-a-GCST90013864	0.0214904	352063	0.441608	4.84997e-06	0.528875	1331	Intestine_age_gap	TRUE	0.0154794	1.6818e-06	TRUE	6.73731e-06
rs73184769	3	175061183	G	A	G	A	2.17169	0.0250542	0.1044		FALSE	FALSE	FALSE	ebi-a-GCST90013864	0.0149503	352063	0.0937713	1.32098e-07	0.411624	1331	Intestine_age_gap	TRUE	0.0205148	7.97701e-06	TRUE	2.70283e-07
rs7779453	7	19241659	T	C	T	C	-1.17124	-0.00550564	0.4733		FALSE	FALSE	FALSE	ebi-a-GCST90013864	0.00910486	352063	0.545384	1.91081e-06	0.245924	1331	Intestine_age_gap	TRUE	0.0167811	1.03861e-06	TRUE	2.58376e-06
rs9959124	18	71065525	T	G	T	G	-1.0949	-0.00998386	0.3937		FALSE	FALSE	FALSE	ebi-a-GCST90013864	0.00938064	352063	0.28719	9.59705e-06	0.247375	1331	Intestine_age_gap	TRUE	0.0145263	3.21746e-06	TRUE	1.4245e-05
rs10067080	5	157947408	T	C	T	C	1.24591	0.00786636	0.2757		FALSE	FALSE	FALSE	ebi-a-GCST90013868	0.0100569	352063	0.434106	2.89818e-06	0.26634	1331	Intestine_age_gap	TRUE	0.0161989	1.7378e-06	TRUE	4.09133e-06
rs112971931	3	187269749	A	G	A	G	2.66801	-0.0038563	0.04884		FALSE	FALSE	FALSE	ebi-a-GCST90013868	0.0222703	352063	0.862527	3.36e-06	0.574076	1331	Intestine_age_gap	TRUE	0.0159923	8.5167e-08	TRUE	3.95147e-06
rs11586128	1	14950102	T	C	T	C	1.2783	0.00776759	0.24		FALSE	FALSE	FALSE	ebi-a-GCST90013868	0.0103273	352063	0.451964	4.8758e-06	0.279711	1331	Intestine_age_gap	TRUE	0.015472	1.60687e-06	TRUE	6.73855e-06
rs12093040	1	222637341	A	G	A	G	1.1342	0.0158942	0.3576		FALSE	FALSE	FALSE	ebi-a-GCST90013868	0.00941511	352063	0.0913819	9.06501e-06	0.255545	1331	Intestine_age_gap	TRUE	0.0146059	8.09478e-06	TRUE	1.60339e-05
rs1636440	7	101331242	T	C	T	C	-2.25024	0.00125496	0.06236		FALSE	FALSE	FALSE	ebi-a-GCST90013868	0.019438	352063	0.948523	6.82171e-06	0.500145	1331	Intestine_age_gap	TRUE	0.0150029	1.18396e-08	TRUE	7.68599e-06
rs2045100	4	69533702	A	T	A	T	1.62623	0.00552794	0.1521		FALSE	TRUE	TRUE	ebi-a-GCST90013868	0.0126479	352063	0.662066	1.07577e-06	0.333431	1331	Intestine_age_gap	FALSE	0.0175841	5.4259e-07	TRUE	1.3997e-06
rs2876456	20	17406244	T	G	T	G	1.177	0.00673694	0.3129		FALSE	FALSE	FALSE	ebi-a-GCST90013868	0.00983323	352063	0.493269	4.74949e-06	0.257237	1331	Intestine_age_gap	TRUE	0.0155087	1.33326e-06	TRUE	6.4421e-06
rs34820653	6	96030921	G	T	G	T	1.84869	0.0218311	0.0879		FALSE	FALSE	FALSE	ebi-a-GCST90013868	0.0163215	352063	0.181037	8.8599e-06	0.416064	1331	Intestine_age_gap	TRUE	0.0146379	5.08172e-06	TRUE	1.42254e-05
rs34907579	19	16428053	A	G	A	G	1.47606	-0.0131022	0.2787		FALSE	FALSE	FALSE	ebi-a-GCST90013868	0.0100944	352063	0.194301	6.08016e-08	0.272515	1331	Intestine_age_gap	TRUE	0.0215982	4.78528e-06	TRUE	1.12703e-07
rs6761377	2	230571420	C	A	C	A	1.10128	0.00992689	0.4346		FALSE	FALSE	FALSE	ebi-a-GCST90013868	0.00930213	352063	0.285898	5.62658e-06	0.242574	1331	Intestine_age_gap	TRUE	0.015272	3.23476e-06	TRUE	8.48103e-06
rs680321	18	29797958	C	T	C	T	-3.0156	-0.0109876	0.4722		FALSE	FALSE	FALSE	ebi-a-GCST90013868	0.00911094	352063	0.227827	2.01562e-41	0.474051	1331	Intestine_age_gap	TRUE	0.0295492	4.13104e-06	TRUE	4.33997e-10
rs72713577	9	28521742	C	T	C	T	-1.82321	-0.0116075	0.1138		FALSE	FALSE	FALSE	ebi-a-GCST90013868	0.0129015	352063	0.368279	4.4862e-06	0.397431	1331	Intestine_age_gap	TRUE	0.0155884	2.29921e-06	TRUE	6.48322e-06
rs7291273	22	45212829	A	C	A	C	-2.41758	0.0165364	0.0556		FALSE	FALSE	FALSE	ebi-a-GCST90013868	0.0214904	352063	0.441608	4.84997e-06	0.528875	1331	Intestine_age_gap	TRUE	0.0154794	1.6818e-06	TRUE	6.73731e-06
rs73184769	3	175061183	G	A	G	A	2.17169	0.0250542	0.1044		FALSE	FALSE	FALSE	ebi-a-GCST90013868	0.0149503	352063	0.0937713	1.32098e-07	0.411624	1331	Intestine_age_gap	TRUE	0.0205148	7.97701e-06	TRUE	2.70283e-07
rs7779453	7	19241659	T	C	T	C	-1.17124	-0.00550564	0.4733		FALSE	FALSE	FALSE	ebi-a-GCST90013868	0.00910486	352063	0.545384	1.91081e-06	0.245924	1331	Intestine_age_gap	TRUE	0.0167811	1.03861e-06	TRUE	2.58376e-06
rs9959124	18	71065525	T	G	T	G	-1.0949	-0.00998386	0.3937		FALSE	FALSE	FALSE	ebi-a-GCST90013868	0.00938064	352063	0.28719	9.59705e-06	0.247375	1331	Intestine_age_gap	TRUE	0.0145263	3.21746e-06	TRUE	1.4245e-05
rs10067080	5	157947408	T	C	T	C	1.24591	-0.05178	0.2757		FALSE	FALSE	FALSE	ebi-a-GCST90013891	0.0791172	407746	0.512808	2.89818e-06	0.26634	1331	Intestine_age_gap	TRUE	0.0161989	1.0505e-06	TRUE	3.86445e-06
rs112971931	3	187269749	A	G	A	G	2.66801	0.103766	0.04884		FALSE	FALSE	FALSE	ebi-a-GCST90013891	0.174192	407746	0.551377	3.36e-06	0.574076	1331	Intestine_age_gap	TRUE	0.0159923	8.70294e-07	TRUE	4.39482e-06
rs11586128	1	14950102	T	C	T	C	1.2783	0.0231324	0.24		FALSE	FALSE	FALSE	ebi-a-GCST90013891	0.0814776	407746	0.776478	4.8758e-06	0.279711	1331	Intestine_age_gap	TRUE	0.015472	1.97687e-07	TRUE	5.81842e-06
rs12093040	1	222637341	A	G	A	G	1.1342	0.0902723	0.3576		FALSE	FALSE	FALSE	ebi-a-GCST90013891	0.074279	407746	0.224247	9.06501e-06	0.255545	1331	Intestine_age_gap	TRUE	0.0146059	3.62233e-06	TRUE	1.36536e-05
rs1636440	7	101331242	T	C	T	C	-2.25024	0.14788	0.06236		FALSE	FALSE	FALSE	ebi-a-GCST90013891	0.15384	407746	0.336423	6.82171e-06	0.500145	1331	Intestine_age_gap	TRUE	0.0150029	2.26617e-06	TRUE	9.68511e-06
rs2045100	4	69533702	A	T	A	T	1.62623	0.156397	0.1521		FALSE	TRUE	TRUE	ebi-a-GCST90013891	0.100094	407746	0.118172	1.07577e-06	0.333431	1331	Intestine_age_gap	FALSE	0.0175841	5.98757e-06	TRUE	1.89737e-06
rs2876456	20	17406244	T	G	T	G	1.177	-0.0436487	0.3129		FALSE	FALSE	FALSE	ebi-a-GCST90013891	0.0774968	407746	0.573276	4.74949e-06	0.257237	1331	Intestine_age_gap	TRUE	0.0155087	7.78014e-07	TRUE	6.11391e-06
rs34820653	6	96030921	G	T	G	T	1.84869	-0.181486	0.0879		FALSE	FALSE	FALSE	ebi-a-GCST90013891	0.129084	407746	0.159737	8.8599e-06	0.416064	1331	Intestine_age_gap	TRUE	0.0146379	4.84788e-06	TRUE	1.40309e-05
rs34907579	19	16428053	A	G	A	G	1.47606	0.008154	0.2787		FALSE	FALSE	FALSE	ebi-a-GCST90013891	0.0796115	407746	0.918421	6.08016e-08	0.272515	1331	Intestine_age_gap	TRUE	0.0215982	2.57278e-08	TRUE	7.4459e-08
rs6761377	2	230571420	C	A	C	A	1.10128	-0.0652147	0.4346		FALSE	FALSE	FALSE	ebi-a-GCST90013891	0.0733654	407746	0.374055	5.62658e-06	0.242574	1331	Intestine_age_gap	TRUE	0.015272	1.93785e-06	TRUE	7.87337e-06
rs680321	18	29797958	C	T	C	T	-3.0156	0.00833955	0.4722		FALSE	FALSE	FALSE	ebi-a-GCST90013891	0.071788	407746	0.907519	2.01562e-41	0.474051	1331	Intestine_age_gap	TRUE	0.0295492	3.30974e-08	TRUE	2.78651e-10
rs72713577	9	28521742	C	T	C	T	-1.82321	-0.0479514	0.1138		FALSE	FALSE	FALSE	ebi-a-GCST90013891	0.101563	407746	0.636829	4.4862e-06	0.397431	1331	Intestine_age_gap	TRUE	0.0155884	5.46693e-07	TRUE	5.6412e-06
rs7291273	22	45212829	A	C	A	C	-2.41758	0.1455	0.0556		FALSE	FALSE	FALSE	ebi-a-GCST90013891	0.169754	407746	0.391377	4.84997e-06	0.528875	1331	Intestine_age_gap	TRUE	0.0154794	1.80176e-06	TRUE	6.75313e-06
rs73184769	3	175061183	G	A	G	A	2.17169	0.101849	0.1044		FALSE	FALSE	FALSE	ebi-a-GCST90013891	0.117984	407746	0.388003	1.32098e-07	0.411624	1331	Intestine_age_gap	TRUE	0.0205148	1.82759e-06	TRUE	2.01483e-07
rs7779453	7	19241659	T	C	T	C	-1.17124	0.00395965	0.4733		FALSE	FALSE	FALSE	ebi-a-GCST90013891	0.0718563	407746	0.956055	1.91081e-06	0.245924	1331	Intestine_age_gap	TRUE	0.0167811	7.44726e-09	TRUE	2.17386e-06
rs9959124	18	71065525	T	G	T	G	-1.0949	-0.00358101	0.3937		FALSE	FALSE	FALSE	ebi-a-GCST90013891	0.0739896	407746	0.961398	9.59705e-06	0.247375	1331	Intestine_age_gap	TRUE	0.0145263	5.7449e-09	TRUE	1.06436e-05
rs10067080	5	157947408	T	C	T	C	1.24591	-0.0159733	0.2757		FALSE	FALSE	FALSE	ebi-a-GCST90013892	0.0118089	406831	0.176166	2.89818e-06	0.26634	1331	Intestine_age_gap	TRUE	0.0161989	4.49735e-06	TRUE	4.67966e-06
rs112971931	3	187269749	A	G	A	G	2.66801	-0.00789053	0.04884		FALSE	FALSE	FALSE	ebi-a-GCST90013892	0.0261284	406831	0.76266	3.36e-06	0.574076	1331	Intestine_age_gap	TRUE	0.0159923	2.24169e-07	TRUE	4.05627e-06
rs11586128	1	14950102	T	C	T	C	1.2783	0.0178891	0.24		FALSE	FALSE	FALSE	ebi-a-GCST90013892	0.0121125	406831	0.139698	4.8758e-06	0.279711	1331	Intestine_age_gap	TRUE	0.015472	5.36161e-06	TRUE	8.01443e-06
rs12093040	1	222637341	A	G	A	G	1.1342	-0.0140716	0.3576		FALSE	FALSE	FALSE	ebi-a-GCST90013892	0.0110556	406831	0.203087	9.06501e-06	0.255545	1331	Intestine_age_gap	TRUE	0.0146059	3.98207e-06	TRUE	1.38651e-05
rs1636440	7	101331242	T	C	T	C	-2.25024	-0.026105	0.06236		FALSE	FALSE	FALSE	ebi-a-GCST90013892	0.0228143	406831	0.252525	6.82171e-06	0.500145	1331	Intestine_age_gap	TRUE	0.0150029	3.21825e-06	TRUE	1.01679e-05
rs2045100	4	69533702	A	T	A	T	1.62623	0.0262837	0.1521		FALSE	TRUE	TRUE	ebi-a-GCST90013892	0.0148675	406831	0.0770832	1.07577e-06	0.333431	1331	Intestine_age_gap	FALSE	0.0175841	7.68213e-06	TRUE	2.01188e-06
rs2876456	20	17406244	T	G	T	G	1.177	0.0144549	0.3129		FALSE	FALSE	FALSE	ebi-a-GCST90013892	0.0115392	406831	0.210323	4.74949e-06	0.257237	1331	Intestine_age_gap	TRUE	0.0155087	3.85714e-06	TRUE	7.35898e-06
rs34820653	6	96030921	G	T	G	T	1.84869	-0.0327615	0.0879		FALSE	FALSE	FALSE	ebi-a-GCST90013892	0.0191702	406831	0.0874541	8.8599e-06	0.416064	1331	Intestine_age_gap	TRUE	0.0146379	7.17892e-06	TRUE	1.51851e-05
rs34907579	19	16428053	A	G	A	G	1.47606	-0.0119786	0.2787		FALSE	FALSE	FALSE	ebi-a-GCST90013892	0.0118725	406831	0.313003	6.08016e-08	0.272515	1331	Intestine_age_gap	TRUE	0.0215982	2.50216e-06	TRUE	9.91197e-08
rs6761377	2	230571420	C	A	C	A	1.10128	0.000798755	0.4346		FALSE	FALSE	FALSE	ebi-a-GCST90013892	0.0109474	406831	0.941835	5.62658e-06	0.242574	1331	Intestine_age_gap	TRUE	0.015272	1.30856e-08	TRUE	6.32967e-06
rs680321	18	29797958	C	T	C	T	-3.0156	-0.021571	0.4722		FALSE	FALSE	FALSE	ebi-a-GCST90013892	0.0106992	406831	0.0437391	2.01562e-41	0.474051	1331	Intestine_age_gap	TRUE	0.0295492	9.99129e-06	TRUE	5.58182e-10
rs72713577	9	28521742	C	T	C	T	-1.82321	-0.000256654	0.1138		FALSE	FALSE	FALSE	ebi-a-GCST90013892	0.01517	406831	0.986502	4.4862e-06	0.397431	1331	Intestine_age_gap	TRUE	0.0155884	7.03579e-10	TRUE	4.98713e-06
rs7291273	22	45212829	A	C	A	C	-2.41758	0.0650757	0.0556		FALSE	FALSE	FALSE	ebi-a-GCST90013892	0.0245777	406831	0.00862125	4.84997e-06	0.528875	1331	Intestine_age_gap	TRUE	0.0154794	1.7232e-05	TRUE	1.08693e-05
rs73184769	3	175061183	G	A	G	A	2.17169	-0.0110303	0.1044		FALSE	FALSE	FALSE	ebi-a-GCST90013892	0.0175417	406831	0.529477	1.32098e-07	0.411624	1331	Intestine_age_gap	TRUE	0.0205148	9.71894e-07	TRUE	1.8756e-07
rs7779453	7	19241659	T	C	T	C	-1.17124	-0.00564655	0.4733		FALSE	FALSE	FALSE	ebi-a-GCST90013892	0.0106921	406831	0.597427	1.91081e-06	0.245924	1331	Intestine_age_gap	TRUE	0.0167811	6.85533e-07	TRUE	2.48264e-06
rs9959124	18	71065525	T	G	T	G	-1.0949	0.000307917	0.3937		FALSE	FALSE	FALSE	ebi-a-GCST90013892	0.0110125	406831	0.977694	9.59705e-06	0.247375	1331	Intestine_age_gap	TRUE	0.0145263	1.92169e-09	TRUE	1.05875e-05
rs10067080	5	157947408	T	C	T	C	1.24591	-0.05178	0.2757		FALSE	FALSE	FALSE	ebi-a-GCST90013941	0.0791172	407746	0.512808	2.89818e-06	0.26634	1331	Intestine_age_gap	TRUE	0.0161989	1.0505e-06	TRUE	3.86445e-06
rs112971931	3	187269749	A	G	A	G	2.66801	0.103766	0.04884		FALSE	FALSE	FALSE	ebi-a-GCST90013941	0.174192	407746	0.551377	3.36e-06	0.574076	1331	Intestine_age_gap	TRUE	0.0159923	8.70294e-07	TRUE	4.39482e-06
rs11586128	1	14950102	T	C	T	C	1.2783	0.0231324	0.24		FALSE	FALSE	FALSE	ebi-a-GCST90013941	0.0814776	407746	0.776478	4.8758e-06	0.279711	1331	Intestine_age_gap	TRUE	0.015472	1.97687e-07	TRUE	5.81842e-06
rs12093040	1	222637341	A	G	A	G	1.1342	0.0902723	0.3576		FALSE	FALSE	FALSE	ebi-a-GCST90013941	0.074279	407746	0.224247	9.06501e-06	0.255545	1331	Intestine_age_gap	TRUE	0.0146059	3.62233e-06	TRUE	1.36536e-05
rs1636440	7	101331242	T	C	T	C	-2.25024	0.14788	0.06236		FALSE	FALSE	FALSE	ebi-a-GCST90013941	0.15384	407746	0.336423	6.82171e-06	0.500145	1331	Intestine_age_gap	TRUE	0.0150029	2.26617e-06	TRUE	9.68511e-06
rs2045100	4	69533702	A	T	A	T	1.62623	0.156397	0.1521		FALSE	TRUE	TRUE	ebi-a-GCST90013941	0.100094	407746	0.118172	1.07577e-06	0.333431	1331	Intestine_age_gap	FALSE	0.0175841	5.98757e-06	TRUE	1.89737e-06
rs2876456	20	17406244	T	G	T	G	1.177	-0.0436487	0.3129		FALSE	FALSE	FALSE	ebi-a-GCST90013941	0.0774968	407746	0.573276	4.74949e-06	0.257237	1331	Intestine_age_gap	TRUE	0.0155087	7.78014e-07	TRUE	6.11391e-06
rs34820653	6	96030921	G	T	G	T	1.84869	-0.181486	0.0879		FALSE	FALSE	FALSE	ebi-a-GCST90013941	0.129084	407746	0.159737	8.8599e-06	0.416064	1331	Intestine_age_gap	TRUE	0.0146379	4.84788e-06	TRUE	1.40309e-05
rs34907579	19	16428053	A	G	A	G	1.47606	0.008154	0.2787		FALSE	FALSE	FALSE	ebi-a-GCST90013941	0.0796115	407746	0.918421	6.08016e-08	0.272515	1331	Intestine_age_gap	TRUE	0.0215982	2.57278e-08	TRUE	7.4459e-08
rs6761377	2	230571420	C	A	C	A	1.10128	-0.0652147	0.4346		FALSE	FALSE	FALSE	ebi-a-GCST90013941	0.0733654	407746	0.374055	5.62658e-06	0.242574	1331	Intestine_age_gap	TRUE	0.015272	1.93785e-06	TRUE	7.87337e-06
rs680321	18	29797958	C	T	C	T	-3.0156	0.00833955	0.4722		FALSE	FALSE	FALSE	ebi-a-GCST90013941	0.071788	407746	0.907519	2.01562e-41	0.474051	1331	Intestine_age_gap	TRUE	0.0295492	3.30974e-08	TRUE	2.78651e-10
rs72713577	9	28521742	C	T	C	T	-1.82321	-0.0479514	0.1138		FALSE	FALSE	FALSE	ebi-a-GCST90013941	0.101563	407746	0.636829	4.4862e-06	0.397431	1331	Intestine_age_gap	TRUE	0.0155884	5.46693e-07	TRUE	5.6412e-06
rs7291273	22	45212829	A	C	A	C	-2.41758	0.1455	0.0556		FALSE	FALSE	FALSE	ebi-a-GCST90013941	0.169754	407746	0.391377	4.84997e-06	0.528875	1331	Intestine_age_gap	TRUE	0.0154794	1.80176e-06	TRUE	6.75313e-06
rs73184769	3	175061183	G	A	G	A	2.17169	0.101849	0.1044		FALSE	FALSE	FALSE	ebi-a-GCST90013941	0.117984	407746	0.388003	1.32098e-07	0.411624	1331	Intestine_age_gap	TRUE	0.0205148	1.82759e-06	TRUE	2.01483e-07
rs7779453	7	19241659	T	C	T	C	-1.17124	0.00395965	0.4733		FALSE	FALSE	FALSE	ebi-a-GCST90013941	0.0718563	407746	0.956055	1.91081e-06	0.245924	1331	Intestine_age_gap	TRUE	0.0167811	7.44726e-09	TRUE	2.17386e-06
rs9959124	18	71065525	T	G	T	G	-1.0949	-0.00358101	0.3937		FALSE	FALSE	FALSE	ebi-a-GCST90013941	0.0739896	407746	0.961398	9.59705e-06	0.247375	1331	Intestine_age_gap	TRUE	0.0145263	5.7449e-09	TRUE	1.06436e-05
rs10067080	5	157947408	T	C	T	C	1.24591	-0.0159733	0.2757		FALSE	FALSE	FALSE	ebi-a-GCST90013942	0.0118089	406831	0.176166	2.89818e-06	0.26634	1331	Intestine_age_gap	TRUE	0.0161989	4.49735e-06	TRUE	4.67966e-06
rs112971931	3	187269749	A	G	A	G	2.66801	-0.00789053	0.04884		FALSE	FALSE	FALSE	ebi-a-GCST90013942	0.0261284	406831	0.76266	3.36e-06	0.574076	1331	Intestine_age_gap	TRUE	0.0159923	2.24169e-07	TRUE	4.05627e-06
rs11586128	1	14950102	T	C	T	C	1.2783	0.0178891	0.24		FALSE	FALSE	FALSE	ebi-a-GCST90013942	0.0121125	406831	0.139698	4.8758e-06	0.279711	1331	Intestine_age_gap	TRUE	0.015472	5.36161e-06	TRUE	8.01443e-06
rs12093040	1	222637341	A	G	A	G	1.1342	-0.0140716	0.3576		FALSE	FALSE	FALSE	ebi-a-GCST90013942	0.0110556	406831	0.203087	9.06501e-06	0.255545	1331	Intestine_age_gap	TRUE	0.0146059	3.98207e-06	TRUE	1.38651e-05
rs1636440	7	101331242	T	C	T	C	-2.25024	-0.026105	0.06236		FALSE	FALSE	FALSE	ebi-a-GCST90013942	0.0228143	406831	0.252525	6.82171e-06	0.500145	1331	Intestine_age_gap	TRUE	0.0150029	3.21825e-06	TRUE	1.01679e-05
rs2045100	4	69533702	A	T	A	T	1.62623	0.0262837	0.1521		FALSE	TRUE	TRUE	ebi-a-GCST90013942	0.0148675	406831	0.0770832	1.07577e-06	0.333431	1331	Intestine_age_gap	FALSE	0.0175841	7.68213e-06	TRUE	2.01188e-06
rs2876456	20	17406244	T	G	T	G	1.177	0.0144549	0.3129		FALSE	FALSE	FALSE	ebi-a-GCST90013942	0.0115392	406831	0.210323	4.74949e-06	0.257237	1331	Intestine_age_gap	TRUE	0.0155087	3.85714e-06	TRUE	7.35898e-06
rs34820653	6	96030921	G	T	G	T	1.84869	-0.0327615	0.0879		FALSE	FALSE	FALSE	ebi-a-GCST90013942	0.0191702	406831	0.0874541	8.8599e-06	0.416064	1331	Intestine_age_gap	TRUE	0.0146379	7.17892e-06	TRUE	1.51851e-05
rs34907579	19	16428053	A	G	A	G	1.47606	-0.0119786	0.2787		FALSE	FALSE	FALSE	ebi-a-GCST90013942	0.0118725	406831	0.313003	6.08016e-08	0.272515	1331	Intestine_age_gap	TRUE	0.0215982	2.50216e-06	TRUE	9.91197e-08
rs6761377	2	230571420	C	A	C	A	1.10128	0.000798755	0.4346		FALSE	FALSE	FALSE	ebi-a-GCST90013942	0.0109474	406831	0.941835	5.62658e-06	0.242574	1331	Intestine_age_gap	TRUE	0.015272	1.30856e-08	TRUE	6.32967e-06
rs680321	18	29797958	C	T	C	T	-3.0156	-0.02157	0.4722		FALSE	FALSE	FALSE	ebi-a-GCST90013942	0.0106929	406831	0.0436717	2.01562e-41	0.474051	1331	Intestine_age_gap	TRUE	0.0295492	1.00021e-05	TRUE	5.58403e-10
rs72713577	9	28521742	C	T	C	T	-1.82321	-0.000256654	0.1138		FALSE	FALSE	FALSE	ebi-a-GCST90013942	0.01517	406831	0.986502	4.4862e-06	0.397431	1331	Intestine_age_gap	TRUE	0.0155884	7.03579e-10	TRUE	4.98713e-06
rs7291273	22	45212829	A	C	A	C	-2.41758	0.0659925	0.0556		FALSE	FALSE	FALSE	ebi-a-GCST90013942	0.0251791	406831	0.0087692	4.84997e-06	0.528875	1331	Intestine_age_gap	TRUE	0.0154794	1.68846e-05	TRUE	1.07929e-05
rs73184769	3	175061183	G	A	G	A	2.17169	-0.0110303	0.1044		FALSE	FALSE	FALSE	ebi-a-GCST90013942	0.0175417	406831	0.529477	1.32098e-07	0.411624	1331	Intestine_age_gap	TRUE	0.0205148	9.71894e-07	TRUE	1.8756e-07
rs7779453	7	19241659	T	C	T	C	-1.17124	-0.00564655	0.4733		FALSE	FALSE	FALSE	ebi-a-GCST90013942	0.0106921	406831	0.597427	1.91081e-06	0.245924	1331	Intestine_age_gap	TRUE	0.0167811	6.85533e-07	TRUE	2.48264e-06
rs9959124	18	71065525	T	G	T	G	-1.0949	0.000307917	0.3937		FALSE	FALSE	FALSE	ebi-a-GCST90013942	0.0110125	406831	0.977694	9.59705e-06	0.247375	1331	Intestine_age_gap	TRUE	0.0145263	1.92169e-09	TRUE	1.05875e-05
rs10067080	5	157947408	T	C	T	C	1.24591	-0.0084	0.2757	0.34993	FALSE	FALSE	FALSE	ebi-a-GCST90018793	0.0083	470931	0.3101	2.89818e-06	0.26634	1331	Intestine_age_gap	TRUE	0.0161989	2.17493e-06	TRUE	4.1609e-06
rs112971931	3	187269749	A	G	A	G	2.66801	-0.0141	0.04884	0.042048	FALSE	FALSE	FALSE	ebi-a-GCST90018793	0.0243	470931	0.560701	3.36e-06	0.574076	1331	Intestine_age_gap	TRUE	0.0159923	7.14941e-07	TRUE	4.30764e-06
rs11586128	1	14950102	T	C	T	C	1.2783	0.0214	0.24	0.267836	FALSE	FALSE	FALSE	ebi-a-GCST90018793	0.0088	470931	0.0154999	4.8758e-06	0.279711	1331	Intestine_age_gap	TRUE	0.015472	1.25574e-05	TRUE	9.82023e-06
rs12093040	1	222637341	A	G	A	G	1.1342	0.0169	0.3576	0.345669	FALSE	FALSE	FALSE	ebi-a-GCST90018793	0.0083	470931	0.0407699	9.06501e-06	0.255545	1331	Intestine_age_gap	TRUE	0.0146059	8.80355e-06	TRUE	1.62082e-05
rs151000551	X	80167991	T	A	T	A	-1.44371	-0.0369	0.08333	0.0780883	FALSE	TRUE	FALSE	ebi-a-GCST90018793	0.0139	470931	0.00786593	3.80952e-06	0.312389	1331	Intestine_age_gap	TRUE	0.0158168	1.49645e-05	TRUE	8.18709e-06
rs1636440	7	101331242	T	C	T	C	-2.25024	0.034	0.06236	0.056432	FALSE	FALSE	FALSE	ebi-a-GCST90018793	0.021	470931	0.1055	6.82171e-06	0.500145	1331	Intestine_age_gap	TRUE	0.0150029	5.56623e-06	TRUE	1.11296e-05
rs2045100	4	69533702	A	T	A	T	1.62623	0.0179	0.1521	0.232659	FALSE	TRUE	FALSE	ebi-a-GCST90018793	0.0099	470931	0.0695601	1.07577e-06	0.333431	1331	Intestine_age_gap	TRUE	0.0175841	6.94188e-06	TRUE	1.95266e-06
rs2876456	20	17406244	T	G	T	G	1.177	-0.0023	0.3129	0.36148	FALSE	FALSE	FALSE	ebi-a-GCST90018793	0.0081	470931	0.774499	4.74949e-06	0.257237	1331	Intestine_age_gap	TRUE	0.0155087	1.7121e-07	TRUE	5.61377e-06
rs34820653	6	96030921	G	T	G	T	1.84869	0.0483	0.0879	0.0771833	FALSE	FALSE	FALSE	ebi-a-GCST90018793	0.0181	470931	0.00753408	8.8599e-06	0.416064	1331	Intestine_age_gap	TRUE	0.0146379	1.51208e-05	TRUE	1.8444e-05
rs34907579	19	16428053	A	G	A	G	1.47606	-0.0053	0.2787	0.281467	FALSE	FALSE	FALSE	ebi-a-GCST90018793	0.0107	470931	0.619001	6.08016e-08	0.272515	1331	Intestine_age_gap	TRUE	0.0215982	5.20989e-07	TRUE	8.28508e-08
rs6622298	X	107463272	T	A	T	A	0.857687	0.0182	0.3272	0.435666	FALSE	TRUE	TRUE	ebi-a-GCST90018793	0.0066	470931	0.00569403	5.85855e-06	0.189275	1331	Intestine_age_gap	FALSE	0.0152155	1.6147e-05	TRUE	1.26801e-05
rs6761377	2	230571420	C	A	C	A	1.10128	-0.0058	0.4346	0.501656	FALSE	FALSE	FALSE	ebi-a-GCST90018793	0.0081	470931	0.4763	5.62658e-06	0.242574	1331	Intestine_age_gap	TRUE	0.015272	1.08875e-06	TRUE	7.3857e-06
rs680321	18	29797958	C	T	C	T	-3.0156	-0.0095	0.4722	0.420721	FALSE	FALSE	FALSE	ebi-a-GCST90018793	0.008	470931	0.2312	2.01562e-41	0.474051	1331	Intestine_age_gap	TRUE	0.0295492	2.9944e-06	TRUE	3.96912e-10
rs72713577	9	28521742	C	T	C	T	-1.82321	-0.0055	0.1138	0.145606	FALSE	FALSE	FALSE	ebi-a-GCST90018793	0.0113	470931	0.6259	4.4862e-06	0.397431	1331	Intestine_age_gap	TRUE	0.0155884	5.03052e-07	TRUE	5.58568e-06
rs7291273	22	45212829	A	C	A	C	-2.41758	-0.0089	0.0556	0.123976	FALSE	FALSE	FALSE	ebi-a-GCST90018793	0.0121	470931	0.4646	4.84997e-06	0.528875	1331	Intestine_age_gap	TRUE	0.0154794	1.14882e-06	TRUE	6.41745e-06
rs73184769	3	175061183	G	A	G	A	2.17169	0.0182	0.1044	0.0903142	FALSE	FALSE	FALSE	ebi-a-GCST90018793	0.0147	470931	0.2148	1.32098e-07	0.411624	1331	Intestine_age_gap	TRUE	0.0205148	3.255e-06	TRUE	2.1877e-07
rs7779453	7	19241659	T	C	T	C	-1.17124	0.0052	0.4733	0.415746	FALSE	FALSE	FALSE	ebi-a-GCST90018793	0.0084	470931	0.5352	1.91081e-06	0.245924	1331	Intestine_age_gap	TRUE	0.0167811	8.13752e-07	TRUE	2.50286e-06
rs9959124	18	71065525	T	G	T	G	-1.0949	-0.0019	0.3937	0.43415	FALSE	FALSE	FALSE	ebi-a-GCST90018793	0.008	470931	0.8095	9.59705e-06	0.247375	1331	Intestine_age_gap	TRUE	0.0145263	1.19777e-07	TRUE	1.1088e-05
rs10067080	5	157947408	T	C	T	C	1.24591	-0.034	0.2757	0.353714	FALSE	FALSE	FALSE	ebi-a-GCST90018890	0.0147	483078	0.0210902	2.89818e-06	0.26634	1331	Intestine_age_gap	TRUE	0.0161989	1.1074e-05	TRUE	5.73562e-06
rs112971931	3	187269749	A	G	A	G	2.66801	-0.0236	0.04884	0.0419416	FALSE	FALSE	FALSE	ebi-a-GCST90018890	0.0461	483078	0.6092	3.36e-06	0.574076	1331	Intestine_age_gap	TRUE	0.0159923	5.42508e-07	TRUE	4.22313e-06
rs11586128	1	14950102	T	C	T	C	1.2783	-0.0053	0.24	0.26832	FALSE	FALSE	FALSE	ebi-a-GCST90018890	0.016	483078	0.7424	4.8758e-06	0.279711	1331	Intestine_age_gap	TRUE	0.015472	2.27141e-07	TRUE	5.81885e-06
rs12093040	1	222637341	A	G	A	G	1.1342	0.0094	0.3576	0.345179	FALSE	FALSE	FALSE	ebi-a-GCST90018890	0.015	483078	0.5282	9.06501e-06	0.255545	1331	Intestine_age_gap	TRUE	0.0146059	8.12938e-07	TRUE	1.14972e-05
rs151000551	X	80167991	T	A	T	A	-1.44371	-0.0199	0.08333	0.0782582	FALSE	TRUE	FALSE	ebi-a-GCST90018890	0.0245	483078	0.4153	3.80952e-06	0.312389	1331	Intestine_age_gap	TRUE	0.0158168	1.36571e-06	TRUE	5.14861e-06
rs1636440	7	101331242	T	C	T	C	-2.25024	0.0394	0.06236	0.05638	FALSE	FALSE	FALSE	ebi-a-GCST90018890	0.0397	483078	0.3215	6.82171e-06	0.500145	1331	Intestine_age_gap	TRUE	0.0150029	2.0389e-06	TRUE	9.50992e-06
rs2045100	4	69533702	A	T	A	T	1.62623	0.0082	0.1521	0.235356	FALSE	TRUE	FALSE	ebi-a-GCST90018890	0.0171	483078	0.632799	1.07577e-06	0.333431	1331	Intestine_age_gap	TRUE	0.0175841	4.76014e-07	TRUE	1.37078e-06
rs2876456	20	17406244	T	G	T	G	1.177	0.0202	0.3129	0.363849	FALSE	FALSE	FALSE	ebi-a-GCST90018890	0.0145	483078	0.1635	4.74949e-06	0.257237	1331	Intestine_age_gap	TRUE	0.0155087	4.01744e-06	TRUE	7.36998e-06
rs34820653	6	96030921	G	T	G	T	1.84869	0.0174	0.0879	0.0770921	FALSE	FALSE	FALSE	ebi-a-GCST90018890	0.0347	483078	0.6157	8.8599e-06	0.416064	1331	Intestine_age_gap	TRUE	0.0146379	5.20504e-07	TRUE	1.09078e-05
rs34907579	19	16428053	A	G	A	G	1.47606	0.0036	0.2787	0.281622	FALSE	FALSE	FALSE	ebi-a-GCST90018890	0.0199	483078	0.8578	6.08016e-08	0.272515	1331	Intestine_age_gap	TRUE	0.0215982	6.7746e-08	TRUE	7.54047e-08
rs6622298	X	107463272	T	A	T	A	0.857687	0.0113	0.3272	0.442055	FALSE	TRUE	TRUE	ebi-a-GCST90018890	0.0118	483078	0.3401	5.85855e-06	0.189275	1331	Intestine_age_gap	FALSE	0.0152155	1.89835e-06	TRUE	8.12728e-06
rs6761377	2	230571420	C	A	C	A	1.10128	-0.0307	0.4346	0.506006	FALSE	FALSE	FALSE	ebi-a-GCST90018890	0.0146	483078	0.03491	5.62658e-06	0.242574	1331	Intestine_age_gap	TRUE	0.015272	9.15275e-06	TRUE	1.03231e-05
rs680321	18	29797958	C	T	C	T	-3.0156	-0.0173	0.4722	0.41869	FALSE	FALSE	FALSE	ebi-a-GCST90018890	0.0144	483078	0.23	2.01562e-41	0.474051	1331	Intestine_age_gap	TRUE	0.0295492	2.98779e-06	TRUE	3.96173e-10
rs72713577	9	28521742	C	T	C	T	-1.82321	-0.0003	0.1138	0.146303	FALSE	FALSE	FALSE	ebi-a-GCST90018890	0.0209	483078	0.9903	4.4862e-06	0.397431	1331	Intestine_age_gap	TRUE	0.0155884	4.26515e-10	TRUE	4.95427e-06
rs7291273	22	45212829	A	C	A	C	-2.41758	-0.0128	0.0556	0.128645	FALSE	FALSE	FALSE	ebi-a-GCST90018890	0.0212	483078	0.547	4.84997e-06	0.528875	1331	Intestine_age_gap	TRUE	0.0154794	7.54627e-07	TRUE	6.19274e-06
rs73184769	3	175061183	G	A	G	A	2.17169	-0.0267	0.1044	0.0886909	FALSE	FALSE	FALSE	ebi-a-GCST90018890	0.026	483078	0.3054	1.32098e-07	0.411624	1331	Intestine_age_gap	TRUE	0.0205148	2.18303e-06	TRUE	2.05041e-07
rs7779453	7	19241659	T	C	T	C	-1.17124	0.0119	0.4733	0.411655	FALSE	FALSE	FALSE	ebi-a-GCST90018890	0.0152	483078	0.432	1.91081e-06	0.245924	1331	Intestine_age_gap	TRUE	0.0167811	1.26879e-06	TRUE	2.6029e-06
rs9959124	18	71065525	T	G	T	G	-1.0949	-0.0155	0.3937	0.437009	FALSE	FALSE	FALSE	ebi-a-GCST90018890	0.0145	483078	0.2839	9.59705e-06	0.247375	1331	Intestine_age_gap	TRUE	0.0145263	2.36543e-06	TRUE	1.35166e-05
rs10067080	5	157947408	T	C	T	C	1.24591	-0.0934695	0.2757	0.307	FALSE	FALSE	FALSE	ebi-a-GCST90026412	0.079089	3196	0.237271	2.89818e-06	0.26634	1331	Intestine_age_gap	TRUE	0.0161989	0.000437102	TRUE	0.00104281
rs11586128	1	14950102	T	C	T	C	1.2783	0.0829972	0.24	0.232	FALSE	FALSE	FALSE	ebi-a-GCST90026412	0.0884319	3196	0.347959	4.8758e-06	0.279711	1331	Intestine_age_gap	TRUE	0.015472	0.000275711	TRUE	0.000898085
rs12093040	1	222637341	A	G	A	G	1.1342	-0.113284	0.3576	0.375	FALSE	FALSE	FALSE	ebi-a-GCST90026412	0.0756448	3196	0.134236	9.06501e-06	0.255545	1331	Intestine_age_gap	TRUE	0.0146059	0.00070168	TRUE	0.00363781
rs2045100	4	69533702	A	T	A	T	1.62623	-0.0577358	0.1521	0.166	FALSE	TRUE	FALSE	ebi-a-GCST90026412	0.103047	3196	0.575281	1.07577e-06	0.333431	1331	Intestine_age_gap	TRUE	0.0175841	9.82748e-05	TRUE	0.000155872
rs2876456	20	17406244	T	G	T	G	1.177	0.0299549	0.3129	0.338	FALSE	FALSE	FALSE	ebi-a-GCST90026412	0.0767018	3196	0.696141	4.74949e-06	0.257237	1331	Intestine_age_gap	TRUE	0.0155087	4.77495e-05	TRUE	0.000292142
rs34820653	6	96030921	G	T	G	T	1.84869	-0.000535222	0.0879	0.088	FALSE	FALSE	FALSE	ebi-a-GCST90026412	0.128544	3196	0.996677	8.8599e-06	0.416064	1331	Intestine_age_gap	TRUE	0.0146379	5.42787e-09	TRUE	0.000198235
rs34907579	19	16428053	A	G	A	G	1.47606	-0.100977	0.2787	0.267	FALSE	FALSE	FALSE	ebi-a-GCST90026412	0.0879394	3196	0.250863	6.08016e-08	0.272515	1331	Intestine_age_gap	TRUE	0.0215982	0.000412633	TRUE	9.17452e-05
rs6761377	2	230571420	C	A	C	A	1.10128	-0.0602978	0.4346	0.432	FALSE	FALSE	FALSE	ebi-a-GCST90026412	0.0777439	3196	0.438007	5.62658e-06	0.242574	1331	Intestine_age_gap	TRUE	0.015272	0.000188301	TRUE	0.000714787
rs680321	18	29797958	C	T	C	T	-3.0156	-0.0593656	0.4722	0.444	FALSE	FALSE	FALSE	ebi-a-GCST90026412	0.0733457	3196	0.418289	2.01562e-41	0.474051	1331	Intestine_age_gap	TRUE	0.0295492	0.000205067	TRUE	1.06805e-06
rs72713577	9	28521742	C	T	C	T	-1.82321	-0.0593463	0.1138	0.155	FALSE	FALSE	FALSE	ebi-a-GCST90026412	0.120816	3196	0.623265	4.4862e-06	0.397431	1331	Intestine_age_gap	TRUE	0.0155884	7.55389e-05	TRUE	0.000346822
rs7291273	22	45213867	A	C	A	C	-2.41758	-0.115618	0.0556	0.061	FALSE	FALSE	FALSE	ebi-a-GCST90026412	0.161278	3196	0.473446	4.84997e-06	0.528875	1331	Intestine_age_gap	TRUE	0.0154794	0.000160878	TRUE	0.000578118
rs73184769	3	175061183	G	A	G	A	2.17169	-0.0248414	0.1044	0.121	FALSE	FALSE	FALSE	ebi-a-GCST90026412	0.118479	3196	0.833923	1.32098e-07	0.411624	1331	Intestine_age_gap	TRUE	0.0205148	1.37635e-05	TRUE	1.68332e-05
rs7779453	7	19241659	T	C	T	C	-1.17124	-0.000312044	0.4733	0.469	FALSE	FALSE	FALSE	ebi-a-GCST90026412	0.0779964	3196	0.996812	1.91081e-06	0.245924	1331	Intestine_age_gap	TRUE	0.0167811	5.01127e-09	TRUE	6.67692e-05
rs9959124	18	71065525	T	G	T	G	-1.0949	-0.0583753	0.3937	0.402	FALSE	FALSE	FALSE	ebi-a-GCST90026412	0.0744385	3196	0.432918	9.59705e-06	0.247375	1331	Intestine_age_gap	TRUE	0.0145263	0.000192506	TRUE	0.00102269
rs10067080	5	157947408	T	C	T	C	1.24591	0.0501717	0.2757	0.312	FALSE	FALSE	FALSE	ebi-a-GCST90026413	0.0566549	3937	0.375854	2.89818e-06	0.26634	1331	Intestine_age_gap	TRUE	0.0161989	0.000199256	TRUE	0.000333969
rs11586128	1	14950102	T	C	T	C	1.2783	0.115685	0.24	0.236	FALSE	FALSE	FALSE	ebi-a-GCST90026413	0.0606974	3937	0.0566604	4.8758e-06	0.279711	1331	Intestine_age_gap	TRUE	0.015472	0.000922292	TRUE	0.00285864
rs12093040	1	222637341	A	G	A	G	1.1342	-0.049878	0.3576	0.374	FALSE	FALSE	FALSE	ebi-a-GCST90026413	0.0534417	3937	0.35065	9.06501e-06	0.255545	1331	Intestine_age_gap	TRUE	0.0146059	0.000221318	TRUE	0.000785136
rs2045100	4	69533702	A	T	A	T	1.62623	0.0235861	0.1521	0.167	FALSE	TRUE	FALSE	ebi-a-GCST90026413	0.0731785	3937	0.747228	1.07577e-06	0.333431	1331	Intestine_age_gap	TRUE	0.0175841	2.63991e-05	TRUE	5.31864e-05
rs2876456	20	17406244	T	G	T	G	1.177	-0.00674533	0.3129	0.335	FALSE	FALSE	FALSE	ebi-a-GCST90026413	0.0542807	3937	0.901098	4.74949e-06	0.257237	1331	Intestine_age_gap	TRUE	0.0155087	3.92436e-06	TRUE	0.000103579
rs34820653	6	96030921	G	T	G	T	1.84869	0.0162155	0.0879	0.088	FALSE	FALSE	FALSE	ebi-a-GCST90026413	0.0902212	3937	0.857364	8.8599e-06	0.416064	1331	Intestine_age_gap	TRUE	0.0146379	8.20909e-06	TRUE	0.000183493
rs34907579	19	16428053	A	G	A	G	1.47606	-0.0358257	0.2787	0.269	FALSE	FALSE	FALSE	ebi-a-GCST90026413	0.0618655	3937	0.56252	6.08016e-08	0.272515	1331	Intestine_age_gap	TRUE	0.0215982	8.52139e-05	TRUE	1.22195e-05
rs6761377	2	230571420	C	A	C	A	1.10128	-0.0214375	0.4346	0.432	FALSE	FALSE	FALSE	ebi-a-GCST90026413	0.0546105	3937	0.694658	5.62658e-06	0.242574	1331	Intestine_age_gap	TRUE	0.015272	3.91592e-05	TRUE	0.000201797
rs680321	18	29797958	C	T	C	T	-3.0156	-0.0109943	0.4722	0.446	FALSE	FALSE	FALSE	ebi-a-GCST90026413	0.0518384	3937	0.832039	2.01562e-41	0.474051	1331	Intestine_age_gap	TRUE	0.0295492	1.14309e-05	TRUE	8.12991e-08
rs72713577	9	28521742	C	T	C	T	-1.82321	-0.0964561	0.1138	0.153	FALSE	FALSE	FALSE	ebi-a-GCST90026413	0.0875987	3937	0.270856	4.4862e-06	0.397431	1331	Intestine_age_gap	TRUE	0.0155884	0.000308025	TRUE	0.000669853
rs7291273	22	45213867	A	C	A	C	-2.41758	0.117016	0.0556	0.064	FALSE	FALSE	FALSE	ebi-a-GCST90026413	0.110635	3937	0.290203	4.84997e-06	0.528875	1331	Intestine_age_gap	TRUE	0.0154794	0.000284209	TRUE	0.000650918
rs73184769	3	175061183	G	A	G	A	2.17169	-0.0213836	0.1044	0.119	FALSE	FALSE	FALSE	ebi-a-GCST90026413	0.0830569	3937	0.796828	1.32098e-07	0.411624	1331	Intestine_age_gap	TRUE	0.0205148	1.68445e-05	TRUE	1.00999e-05
rs7779453	7	19241659	T	C	T	C	-1.17124	0.0341976	0.4733	0.472	FALSE	FALSE	FALSE	ebi-a-GCST90026413	0.0544799	3937	0.530199	1.91081e-06	0.245924	1331	Intestine_age_gap	TRUE	0.0167811	0.000100122	TRUE	0.000150916
rs9959124	18	71065525	T	G	T	G	-1.0949	0.0518864	0.3937	0.408	FALSE	FALSE	FALSE	ebi-a-GCST90026413	0.0527659	3937	0.325445	9.59705e-06	0.247375	1331	Intestine_age_gap	TRUE	0.0145263	0.000245668	TRUE	0.000892742
rs10067080	5	157947408	T	C	T	C	1.24591	-0.031465	0.2757	0.307	FALSE	FALSE	FALSE	ebi-a-GCST90026414	0.0557805	3874	0.572692	2.89818e-06	0.26634	1331	Intestine_age_gap	TRUE	0.0161989	8.21712e-05	TRUE	0.000184811
rs11586128	1	14950102	T	C	T	C	1.2783	0.0557156	0.24	0.233	FALSE	FALSE	FALSE	ebi-a-GCST90026414	0.0611633	3874	0.362324	4.8758e-06	0.279711	1331	Intestine_age_gap	TRUE	0.015472	0.000214261	TRUE	0.000517796
rs12093040	1	222637341	A	G	A	G	1.1342	0.0527009	0.3576	0.381	FALSE	FALSE	FALSE	ebi-a-GCST90026414	0.0530675	3874	0.320683	9.06501e-06	0.255545	1331	Intestine_age_gap	TRUE	0.0146059	0.000254644	TRUE	0.000909526
rs2045100	4	69533702	A	T	A	T	1.62623	0.192643	0.1521	0.174	FALSE	TRUE	FALSE	ebi-a-GCST90026414	0.0726035	3874	0.00796966	1.07577e-06	0.333431	1331	Intestine_age_gap	TRUE	0.0175841	0.00181496	TRUE	0.00431702
rs2876456	20	17406244	T	G	T	G	1.177	0.0542031	0.3129	0.34	FALSE	FALSE	FALSE	ebi-a-GCST90026414	0.0541637	3874	0.316957	4.74949e-06	0.257237	1331	Intestine_age_gap	TRUE	0.0155087	0.000258573	TRUE	0.000602003
rs34820653	6	96030921	G	T	G	T	1.84869	0.00518321	0.0879	0.088	FALSE	FALSE	FALSE	ebi-a-GCST90026414	0.0909183	3874	0.95454	8.8599e-06	0.416064	1331	Intestine_age_gap	TRUE	0.0146379	8.39381e-07	TRUE	0.000148032
rs34907579	19	16428053	A	G	A	G	1.47606	0.0566783	0.2787	0.273	FALSE	FALSE	FALSE	ebi-a-GCST90026414	0.061708	3874	0.358351	6.08016e-08	0.272515	1331	Intestine_age_gap	TRUE	0.0215982	0.000217832	TRUE	2.77938e-05
rs6761377	2	230571420	C	A	C	A	1.10128	0.0558566	0.4346	0.437	FALSE	FALSE	FALSE	ebi-a-GCST90026414	0.0543422	3874	0.303991	5.62658e-06	0.242574	1331	Intestine_age_gap	TRUE	0.015272	0.000272785	TRUE	0.000707839
rs680321	18	29797958	C	T	C	T	-3.0156	-0.0682632	0.4722	0.443	FALSE	FALSE	FALSE	ebi-a-GCST90026414	0.052069	3874	0.189853	2.01562e-41	0.474051	1331	Intestine_age_gap	TRUE	0.0295492	0.000443697	TRUE	1.60983e-06
rs72713577	9	28521742	C	T	C	T	-1.82321	-0.0859458	0.1138	0.154	FALSE	FALSE	FALSE	ebi-a-GCST90026414	0.0880038	3874	0.328753	4.4862e-06	0.397431	1331	Intestine_age_gap	TRUE	0.0155884	0.000246266	TRUE	0.000554186
rs7291273	22	45213867	A	C	A	C	-2.41758	-0.00722612	0.0556	0.062	FALSE	FALSE	FALSE	ebi-a-GCST90026414	0.114202	3874	0.949545	4.84997e-06	0.528875	1331	Intestine_age_gap	TRUE	0.0154794	1.03402e-06	TRUE	9.59278e-05
rs73184769	3	175061183	G	A	G	A	2.17169	0.0027065	0.1044	0.121	FALSE	FALSE	FALSE	ebi-a-GCST90026414	0.0837264	3874	0.974213	1.32098e-07	0.411624	1331	Intestine_age_gap	TRUE	0.0205148	2.69871e-07	TRUE	6.2219e-06
rs7779453	7	19241659	T	C	T	C	-1.17124	-0.0254685	0.4733	0.467	FALSE	FALSE	FALSE	ebi-a-GCST90026414	0.0546543	3874	0.641235	1.91081e-06	0.245924	1331	Intestine_age_gap	TRUE	0.0167811	5.60788e-05	TRUE	0.000112938
rs9959124	18	71065525	T	G	T	G	-1.0949	0.0291526	0.3937	0.407	FALSE	FALSE	FALSE	ebi-a-GCST90026414	0.0524838	3874	0.578583	9.59705e-06	0.247375	1331	Intestine_age_gap	TRUE	0.0145263	7.96772e-05	TRUE	0.000419151
rs10067080	5	157947408	T	C	T	C	1.24591	-0.0359977	0.2757	0.306	FALSE	FALSE	FALSE	ebi-a-GCST90026415	0.052598	4118	0.493724	2.89818e-06	0.26634	1331	Intestine_age_gap	TRUE	0.0161989	0.000113785	TRUE	0.000201769
rs11586128	1	14950102	T	C	T	C	1.2783	0.116746	0.24	0.237	FALSE	FALSE	FALSE	ebi-a-GCST90026415	0.0583091	4118	0.0452627	4.8758e-06	0.279711	1331	Intestine_age_gap	TRUE	0.015472	0.000973001	TRUE	0.00294796
rs12093040	1	222637341	A	G	A	G	1.1342	-0.00919528	0.3576	0.375	FALSE	FALSE	FALSE	ebi-a-GCST90026415	0.0508867	4118	0.856601	9.06501e-06	0.255545	1331	Intestine_age_gap	TRUE	0.0146059	7.93309e-06	TRUE	0.000170629
rs2045100	4	69533702	A	T	A	T	1.62623	-0.0332857	0.1521	0.165	FALSE	TRUE	FALSE	ebi-a-GCST90026415	0.0690646	4118	0.629832	1.07577e-06	0.333431	1331	Intestine_age_gap	TRUE	0.0175841	5.64293e-05	TRUE	6.64755e-05
rs2876456	20	17406244	T	G	T	G	1.177	-0.0776502	0.3129	0.33	FALSE	FALSE	FALSE	ebi-a-GCST90026415	0.0513909	4118	0.130794	4.74949e-06	0.257237	1331	Intestine_age_gap	TRUE	0.0155087	0.000554366	TRUE	0.00128026
rs34820653	6	96030921	G	T	G	T	1.84869	-0.166139	0.0879	0.083	FALSE	FALSE	FALSE	ebi-a-GCST90026415	0.0870249	4118	0.0562497	8.8599e-06	0.416064	1331	Intestine_age_gap	TRUE	0.0146379	0.000884701	TRUE	0.0036177
rs34907579	19	16428053	A	G	A	G	1.47606	-0.0282284	0.2787	0.27	FALSE	FALSE	FALSE	ebi-a-GCST90026415	0.0584028	4118	0.628866	6.08016e-08	0.272515	1331	Intestine_age_gap	TRUE	0.0215982	5.67551e-05	TRUE	8.51113e-06
rs6761377	2	230571420	C	A	C	A	1.10128	0.0379632	0.4346	0.435	FALSE	FALSE	FALSE	ebi-a-GCST90026415	0.0513125	4118	0.459384	5.62658e-06	0.242574	1331	Intestine_age_gap	TRUE	0.015272	0.000132968	TRUE	0.000356365
rs680321	18	29797958	C	T	C	T	-3.0156	-0.022944	0.4722	0.445	FALSE	FALSE	FALSE	ebi-a-GCST90026415	0.0489564	4118	0.639311	2.01562e-41	0.474051	1331	Intestine_age_gap	TRUE	0.0295492	5.33606e-05	TRUE	1.3649e-07
rs72713577	9	28521742	C	T	C	T	-1.82321	-0.00495586	0.1138	0.156	FALSE	FALSE	FALSE	ebi-a-GCST90026415	0.0817799	4118	0.951659	4.4862e-06	0.397431	1331	Intestine_age_gap	TRUE	0.0155884	8.92214e-07	TRUE	7.91688e-05
rs7291273	22	45213867	A	C	A	C	-2.41758	0.0780892	0.0556	0.064	FALSE	FALSE	FALSE	ebi-a-GCST90026415	0.107001	4118	0.465519	4.84997e-06	0.528875	1331	Intestine_age_gap	TRUE	0.0154794	0.000129382	TRUE	0.000315368
rs73184769	3	175061183	G	A	G	A	2.17169	0.0113769	0.1044	0.12	FALSE	FALSE	FALSE	ebi-a-GCST90026415	0.0780989	4118	0.88418	1.32098e-07	0.411624	1331	Intestine_age_gap	TRUE	0.0205148	5.15561e-06	TRUE	6.86494e-06
rs7779453	7	19241659	T	C	T	C	-1.17124	-0.0124564	0.4733	0.469	FALSE	FALSE	FALSE	ebi-a-GCST90026415	0.0513897	4118	0.808462	1.91081e-06	0.245924	1331	Intestine_age_gap	TRUE	0.0167811	1.42742e-05	TRUE	6.12047e-05
rs9959124	18	71065525	T	G	T	G	-1.0949	0.0439577	0.3937	0.406	FALSE	FALSE	FALSE	ebi-a-GCST90026415	0.0496816	4118	0.37627	9.59705e-06	0.247375	1331	Intestine_age_gap	TRUE	0.0145263	0.000190161	TRUE	0.000672342
rs10067080	5	157947408	T	C	T	C	1.24591	-0.0550127	0.2757	0.303	FALSE	FALSE	FALSE	ebi-a-GCST90026416	0.0427101	5605	0.19773	2.89818e-06	0.26634	1331	Intestine_age_gap	TRUE	0.0161989	0.000296016	TRUE	0.000284447
rs11586128	1	14950102	T	C	T	C	1.2783	0.0674773	0.24	0.237	FALSE	FALSE	FALSE	ebi-a-GCST90026416	0.0465465	5605	0.147147	4.8758e-06	0.279711	1331	Intestine_age_gap	TRUE	0.015472	0.000374937	TRUE	0.000535825
rs12093040	1	222637341	A	G	A	G	1.1342	-0.0378207	0.3576	0.373	FALSE	FALSE	FALSE	ebi-a-GCST90026416	0.0408983	5605	0.355099	9.06501e-06	0.255545	1331	Intestine_age_gap	TRUE	0.0146059	0.000152603	TRUE	0.000350985
rs2045100	4	69533702	A	T	A	T	1.62623	0.00907446	0.1521	0.167	FALSE	TRUE	FALSE	ebi-a-GCST90026416	0.0559619	5605	0.871182	1.07577e-06	0.333431	1331	Intestine_age_gap	TRUE	0.0175841	4.69282e-06	TRUE	1.71183e-05
rs2876456	20	17406244	T	G	T	G	1.177	-0.000765796	0.3129	0.335	FALSE	FALSE	FALSE	ebi-a-GCST90026416	0.0414202	5605	0.985248	4.74949e-06	0.257237	1331	Intestine_age_gap	TRUE	0.0155087	6.10072e-08	TRUE	4.2492e-05
rs34820653	6	96030921	G	T	G	T	1.84869	-0.0538725	0.0879	0.085	FALSE	FALSE	FALSE	ebi-a-GCST90026416	0.0701815	5605	0.442715	8.8599e-06	0.416064	1331	Intestine_age_gap	TRUE	0.0146379	0.000105153	TRUE	0.000264697
rs34907579	19	16428053	A	G	A	G	1.47606	0.0271046	0.2787	0.273	FALSE	FALSE	FALSE	ebi-a-GCST90026416	0.0465196	5605	0.560122	6.08016e-08	0.272515	1331	Intestine_age_gap	TRUE	0.0215982	6.05853e-05	TRUE	4.32178e-06
rs6761377	2	230571420	C	A	C	A	1.10128	-0.0385435	0.4346	0.428	FALSE	FALSE	FALSE	ebi-a-GCST90026416	0.0415908	5605	0.35407	5.62658e-06	0.242574	1331	Intestine_age_gap	TRUE	0.015272	0.000153257	TRUE	0.000248112
rs680321	18	29797958	C	T	C	T	-3.0156	0.0624873	0.4722	0.454	FALSE	FALSE	FALSE	ebi-a-GCST90026416	0.0392156	5605	0.111064	2.01562e-41	0.474051	1331	Intestine_age_gap	TRUE	0.0295492	0.000452948	TRUE	5.99909e-07
rs72713577	9	28521742	C	T	C	T	-1.82321	-0.0409135	0.1138	0.154	FALSE	FALSE	FALSE	ebi-a-GCST90026416	0.0659749	5605	0.535165	4.4862e-06	0.397431	1331	Intestine_age_gap	TRUE	0.0155884	6.86318e-05	TRUE	0.000122644
rs7291273	22	45213867	A	C	A	C	-2.41758	-0.0538612	0.0556	0.061	FALSE	FALSE	FALSE	ebi-a-GCST90026416	0.0879204	5605	0.540128	4.84997e-06	0.528875	1331	Intestine_age_gap	TRUE	0.0154794	6.69766e-05	TRUE	0.000128389
rs73184769	3	175061183	G	A	G	A	2.17169	0.106372	0.1044	0.125	FALSE	FALSE	FALSE	ebi-a-GCST90026416	0.062245	5605	0.0874661	1.32098e-07	0.411624	1331	Intestine_age_gap	TRUE	0.0205148	0.000520953	TRUE	6.96746e-05
rs7779453	7	19241659	T	C	T	C	-1.17124	0.043122	0.4733	0.474	FALSE	FALSE	FALSE	ebi-a-GCST90026416	0.0414213	5605	0.297852	1.91081e-06	0.245924	1331	Intestine_age_gap	TRUE	0.0167811	0.000193395	TRUE	0.000137465
rs9959124	18	71065525	T	G	T	G	-1.0949	-0.0312041	0.3937	0.399	FALSE	FALSE	FALSE	ebi-a-GCST90026416	0.0399527	5605	0.434787	9.59705e-06	0.247375	1331	Intestine_age_gap	TRUE	0.0145263	0.000108859	TRUE	0.00028743
rs10067080	5	157947408	T	C	T	C	1.24591	-0.000904821	0.2757	0.279635	FALSE	FALSE	FALSE	ebi-a-GCST90029019	0.001015	477807	0.34	2.89818e-06	0.26634	1331	Intestine_age_gap	TRUE	0.0161989	1.66319e-06	TRUE	4.02652e-06
rs112971931	3	187269749	A	G	A	G	2.66801	0.00012581	0.04884	0.043432	FALSE	FALSE	FALSE	ebi-a-GCST90029019	0.00223524	477807	0.95	3.36e-06	0.574076	1331	Intestine_age_gap	TRUE	0.0159923	6.63027e-09	TRUE	3.76666e-06
rs11586128	1	14950102	T	C	T	C	1.2783	0.00255699	0.24	0.264257	FALSE	FALSE	FALSE	ebi-a-GCST90029019	0.00103649	477807	0.017	4.8758e-06	0.279711	1331	Intestine_age_gap	TRUE	0.015472	1.27371e-05	TRUE	9.85802e-06
rs12093040	1	222637341	A	G	A	G	1.1342	0.00173446	0.3576	0.362354	FALSE	FALSE	FALSE	ebi-a-GCST90029019	0.000947769	477807	0.0649995	9.06501e-06	0.255545	1331	Intestine_age_gap	TRUE	0.0146059	7.00922e-06	TRUE	1.53705e-05
rs1636440	7	101331242	T	C	T	C	-2.25024	-0.00224472	0.06236	0.05907	FALSE	FALSE	FALSE	ebi-a-GCST90029019	0.00194927	477807	0.24	6.82171e-06	0.500145	1331	Intestine_age_gap	TRUE	0.0150029	2.77542e-06	TRUE	9.90228e-06
rs2045100	4	69533702	A	T	A	T	1.62623	0.00155339	0.1521	0.158175	FALSE	TRUE	FALSE	ebi-a-GCST90029019	0.00127308	477807	0.23	1.07577e-06	0.333431	1331	Intestine_age_gap	TRUE	0.0175841	3.116e-06	TRUE	1.66779e-06
rs2876456	20	17406244	T	G	T	G	1.177	4.93386e-05	0.3129	0.309217	FALSE	FALSE	FALSE	ebi-a-GCST90029019	0.000991242	477807	0.88	4.74949e-06	0.257237	1331	Intestine_age_gap	TRUE	0.0155087	5.18518e-09	TRUE	5.28947e-06
rs34820653	6	96030921	G	T	G	T	1.84869	-0.00150934	0.0879	0.083185	FALSE	FALSE	FALSE	ebi-a-GCST90029019	0.00164966	477807	0.4	8.8599e-06	0.416064	1331	Intestine_age_gap	TRUE	0.0146379	1.752e-06	TRUE	1.20673e-05
rs34907579	19	16428053	A	G	A	G	1.47606	-0.000704042	0.2787	0.281743	FALSE	FALSE	FALSE	ebi-a-GCST90029019	0.00101684	477807	0.46	6.08016e-08	0.272515	1331	Intestine_age_gap	TRUE	0.0215982	1.00332e-06	TRUE	8.75995e-08
rs6761377	2	230571420	C	A	C	A	1.10128	0.000623121	0.4346	0.411079	FALSE	FALSE	FALSE	ebi-a-GCST90029019	0.000936229	477807	0.54	5.62658e-06	0.242574	1331	Intestine_age_gap	TRUE	0.015272	9.27106e-07	TRUE	7.28177e-06
rs680321	18	29797958	C	T	C	T	-3.0156	-0.000715261	0.4722	0.456417	FALSE	FALSE	FALSE	ebi-a-GCST90029019	0.000917226	477807	0.41	2.01562e-41	0.474051	1331	Intestine_age_gap	TRUE	0.0295492	1.2727e-06	TRUE	3.44543e-10
rs72713577	9	28521742	C	T	C	T	-1.82321	0.000202914	0.1138	0.149761	FALSE	FALSE	FALSE	ebi-a-GCST90029019	0.00129663	477807	0.91	4.4862e-06	0.397431	1331	Intestine_age_gap	TRUE	0.0155884	5.12556e-08	TRUE	5.1359e-06
rs7291273	22	45212829	A	C	A	C	-2.41758	0.00106974	0.0556	0.050945	FALSE	FALSE	FALSE	ebi-a-GCST90029019	0.00215278	477807	0.47	4.84997e-06	0.528875	1331	Intestine_age_gap	TRUE	0.0154794	5.16781e-07	TRUE	6.03717e-06
rs73184769	3	175061183	G	A	G	A	2.17169	0.00329394	0.1044	0.104584	FALSE	FALSE	FALSE	ebi-a-GCST90029019	0.0015099	477807	0.0230001	1.32098e-07	0.411624	1331	Intestine_age_gap	TRUE	0.0205148	9.96047e-06	TRUE	2.84333e-07
rs7779453	7	19241659	T	C	T	C	-1.17124	-0.000430184	0.4733	0.46266	FALSE	FALSE	FALSE	ebi-a-GCST90029019	0.000916818	477807	0.6	1.91081e-06	0.245924	1331	Intestine_age_gap	TRUE	0.0167811	4.60778e-07	TRUE	2.40388e-06
rs9959124	18	71065525	T	G	T	G	-1.0949	0.00104935	0.3937	0.385388	FALSE	FALSE	FALSE	ebi-a-GCST90029019	0.000945692	477807	0.25	9.59705e-06	0.247375	1331	Intestine_age_gap	TRUE	0.0145263	2.57685e-06	TRUE	1.36724e-05
rs10067080	5	157947408	T	C	T	C	1.24591	-0.0373042	0.2757	0.282522	FALSE	FALSE	FALSE	ebi-a-GCST90054782	0.0230931	377988	0.119465	2.89818e-06	0.26634	1331	Intestine_age_gap	TRUE	0.0161989	6.90355e-06	TRUE	5.12376e-06
rs112971931	3	187269749	A	G	A	G	2.66801	0.0205181	0.04884	0.0435715	FALSE	FALSE	FALSE	ebi-a-GCST90054782	0.0500602	377988	0.632249	3.36e-06	0.574076	1331	Intestine_age_gap	TRUE	0.0159923	4.4444e-07	TRUE	4.20714e-06
rs11586128	1	14950102	T	C	T	C	1.2783	0.0432989	0.24	0.264195	FALSE	FALSE	FALSE	ebi-a-GCST90054782	0.0231625	377988	0.0468792	4.8758e-06	0.279711	1331	Intestine_age_gap	TRUE	0.015472	9.24492e-06	TRUE	9.0854e-06
rs12093040	1	222637341	A	G	A	G	1.1342	0.0596003	0.3576	0.635069	FALSE	FALSE	FALSE	ebi-a-GCST90054782	0.0212641	377988	0.00250975	9.06501e-06	0.255545	1331	Intestine_age_gap	TRUE	0.0146059	2.07835e-05	TRUE	2.11684e-05
rs1636440	7	101331242	T	C	T	C	-2.25024	-0.0384127	0.06236	0.941206	FALSE	FALSE	FALSE	ebi-a-GCST90054782	0.044574	377988	0.422034	6.82171e-06	0.500145	1331	Intestine_age_gap	TRUE	0.0150029	1.96476e-06	TRUE	9.5423e-06
rs2045100	4	69533702	A	T	A	T	1.62623	-0.0171919	0.1521	0.157499	FALSE	TRUE	FALSE	ebi-a-GCST90054782	0.0284728	377988	0.557984	1.07577e-06	0.333431	1331	Intestine_age_gap	TRUE	0.0175841	9.6452e-07	TRUE	1.45924e-06
rs2876456	20	17406244	T	G	T	G	1.177	0.0103817	0.3129	0.690246	FALSE	FALSE	FALSE	ebi-a-GCST90054782	0.0222616	377988	0.654665	4.74949e-06	0.257237	1331	Intestine_age_gap	TRUE	0.0155087	5.75371e-07	TRUE	6.00177e-06
rs34820653	6	96030921	G	T	G	T	1.84869	0.026749	0.0879	0.0836106	FALSE	FALSE	FALSE	ebi-a-GCST90054782	0.0368552	377988	0.462809	8.8599e-06	0.416064	1331	Intestine_age_gap	TRUE	0.0146379	1.39361e-06	TRUE	1.18694e-05
rs34907579	19	16428053	A	G	A	G	1.47606	0.0178104	0.2787	0.280125	FALSE	FALSE	FALSE	ebi-a-GCST90054782	0.0228801	377988	0.452545	6.08016e-08	0.272515	1331	Intestine_age_gap	TRUE	0.0215982	1.60308e-06	TRUE	9.33817e-08
rs6761377	2	230571420	C	A	C	A	1.10128	-0.0399099	0.4346	0.412212	FALSE	FALSE	FALSE	ebi-a-GCST90054782	0.021025	377988	0.0866583	5.62658e-06	0.242574	1331	Intestine_age_gap	TRUE	0.015272	9.53256e-06	TRUE	1.05126e-05
rs680321	18	29797958	C	T	C	T	-3.0156	-0.00342385	0.4722	0.455082	FALSE	FALSE	FALSE	ebi-a-GCST90054782	0.0207114	377988	0.939746	2.01562e-41	0.474051	1331	Intestine_age_gap	TRUE	0.0295492	7.22994e-08	TRUE	2.85888e-10
rs72713577	9	28521742	C	T	C	T	-1.82321	0.0267004	0.1138	0.149104	FALSE	FALSE	FALSE	ebi-a-GCST90054782	0.0286906	377988	0.409997	4.4862e-06	0.397431	1331	Intestine_age_gap	TRUE	0.0155884	2.29129e-06	TRUE	6.46258e-06
rs7291273	22	45212829	A	C	A	C	-2.41758	0.0298986	0.0556	0.0499449	FALSE	FALSE	FALSE	ebi-a-GCST90054782	0.0467267	377988	0.480685	4.84997e-06	0.528875	1331	Intestine_age_gap	TRUE	0.0154794	1.08317e-06	TRUE	6.43043e-06
rs73184769	3	175061183	G	A	G	A	2.17169	0.0650665	0.1044	0.105503	FALSE	FALSE	FALSE	ebi-a-GCST90054782	0.0327491	377988	0.0610141	1.32098e-07	0.411624	1331	Intestine_age_gap	TRUE	0.0205148	1.04433e-05	TRUE	2.9141e-07
rs7779453	7	19241659	T	C	T	C	-1.17124	-0.00341282	0.4733	0.463361	FALSE	FALSE	FALSE	ebi-a-GCST90054782	0.0206861	377988	0.845781	1.91081e-06	0.245924	1331	Intestine_age_gap	TRUE	0.0167811	7.20102e-08	TRUE	2.25269e-06
rs9959124	18	71065525	T	G	T	G	-1.0949	0.0155288	0.3937	0.385407	FALSE	FALSE	FALSE	ebi-a-GCST90054782	0.021156	377988	0.444461	9.59705e-06	0.247375	1331	Intestine_age_gap	TRUE	0.0145263	1.42539e-06	TRUE	1.28625e-05
rs10067080	5	157947408	T	C	T	C	1.24591	-0.0058	0.2757	0.3273	FALSE	FALSE	FALSE	finn-b-CHIRHEP_NAS	0.0697		0.9334	2.89818e-06	0.26634	1331	Intestine_age_gap		0.0161989
rs112971931	3	187269749	A	G	A	G	2.66801	-0.114	0.04884	0.03842	FALSE	FALSE	FALSE	finn-b-CHIRHEP_NAS	0.1781		0.5219	3.36e-06	0.574076	1331	Intestine_age_gap		0.0159923
rs11586128	1	14950102	T	C	T	C	1.2783	-0.0582	0.24	0.2345	FALSE	FALSE	FALSE	finn-b-CHIRHEP_NAS	0.0771		0.4501	4.8758e-06	0.279711	1331	Intestine_age_gap		0.015472
rs12093040	1	222637341	A	G	A	G	1.1342	-0.0275	0.3576	0.3347	FALSE	FALSE	FALSE	finn-b-CHIRHEP_NAS	0.0696		0.6925	9.06501e-06	0.255545	1331	Intestine_age_gap		0.0146059
rs151000551	X	80167991	T	A	T	A	-1.44371	-0.156	0.08333	0.1043	FALSE	TRUE	FALSE	finn-b-CHIRHEP_NAS	0.0849		0.0661394	3.80952e-06	0.312389	1331	Intestine_age_gap		0.0158168
rs1636440	7	101331242	T	C	T	C	-2.25024	0.1332	0.06236	0.0499	FALSE	FALSE	FALSE	finn-b-CHIRHEP_NAS	0.1507		0.3767	6.82171e-06	0.500145	1331	Intestine_age_gap		0.0150029
rs2045100	4	69533702	A	T	A	T	1.62623	-0.031	0.1521	0.2956	FALSE	TRUE	FALSE	finn-b-CHIRHEP_NAS	0.0725		0.669501	1.07577e-06	0.333431	1331	Intestine_age_gap		0.0175841
rs2876456	20	17406244	T	G	T	G	1.177	-0.0271	0.3129	0.3822	FALSE	FALSE	FALSE	finn-b-CHIRHEP_NAS	0.0674		0.687401	4.74949e-06	0.257237	1331	Intestine_age_gap		0.0155087
rs34820653	6	96030921	G	T	G	T	1.84869	-0.1154	0.0879	0.06034	FALSE	FALSE	FALSE	finn-b-CHIRHEP_NAS	0.1374		0.4009	8.8599e-06	0.416064	1331	Intestine_age_gap		0.0146379
rs34907579	19	16428053	A	G	A	G	1.47606	0.0926	0.2787	0.2858	FALSE	FALSE	FALSE	finn-b-CHIRHEP_NAS	0.0728		0.2034	6.08016e-08	0.272515	1331	Intestine_age_gap		0.0215982
rs6622298	X	107463272	T	A	T	A	0.857687	0.0191	0.3272	0.3129	FALSE	TRUE	FALSE	finn-b-CHIRHEP_NAS	0.0559		0.733	5.85855e-06	0.189275	1331	Intestine_age_gap		0.0152155
rs6761377	2	230571420	C	A	C	A	1.10128	-0.0455	0.4346	0.507	FALSE	FALSE	FALSE	finn-b-CHIRHEP_NAS	0.0656		0.488599	5.62658e-06	0.242574	1331	Intestine_age_gap		0.015272
rs680321	18	29797958	C	T	C	T	-3.0156	-0.1248	0.4722	0.4287	FALSE	FALSE	FALSE	finn-b-CHIRHEP_NAS	0.0662		0.0592107	2.01562e-41	0.474051	1331	Intestine_age_gap		0.0295492
rs72713577	9	28521742	C	T	C	T	-1.82321	-0.0761	0.1138	0.08677	FALSE	FALSE	FALSE	finn-b-CHIRHEP_NAS	0.1188		0.5218	4.4862e-06	0.397431	1331	Intestine_age_gap		0.0155884
rs7291273	22	45212829	A	C	A	C	-2.41758	-0.1237	0.0556	0.05258	FALSE	FALSE	FALSE	finn-b-CHIRHEP_NAS	0.1479		0.403	4.84997e-06	0.528875	1331	Intestine_age_gap		0.0154794
rs73184769	3	175061183	G	A	G	A	2.17169	0.0128	0.1044	0.149	FALSE	FALSE	FALSE	finn-b-CHIRHEP_NAS	0.0921		0.8893	1.32098e-07	0.411624	1331	Intestine_age_gap		0.0205148
rs7779453	7	19241659	T	C	T	C	-1.17124	-0.0263	0.4733	0.5354	FALSE	FALSE	FALSE	finn-b-CHIRHEP_NAS	0.0659		0.6893	1.91081e-06	0.245924	1331	Intestine_age_gap		0.0167811
rs9959124	18	71065525	T	G	T	G	-1.0949	0.0763	0.3937	0.407	FALSE	FALSE	FALSE	finn-b-CHIRHEP_NAS	0.0669		0.2545	9.59705e-06	0.247375	1331	Intestine_age_gap		0.0145263
rs10067080	5	157947408	T	C	T	C	1.24591	0.0041	0.2757	0.3273	FALSE	FALSE	FALSE	finn-b-E4_DIABETES	0.0104		0.695799	2.89818e-06	0.26634	1331	Intestine_age_gap		0.0161989
rs112971931	3	187269749	A	G	A	G	2.66801	0.0159	0.04884	0.03841	FALSE	FALSE	FALSE	finn-b-E4_DIABETES	0.0264		0.5464	3.36e-06	0.574076	1331	Intestine_age_gap		0.0159923
rs11586128	1	14950102	T	C	T	C	1.2783	0.0175	0.24	0.2345	FALSE	FALSE	FALSE	finn-b-E4_DIABETES	0.0115		0.1297	4.8758e-06	0.279711	1331	Intestine_age_gap		0.015472
rs12093040	1	222637341	A	G	A	G	1.1342	0.0029	0.3576	0.3346	FALSE	FALSE	FALSE	finn-b-E4_DIABETES	0.0104		0.7798	9.06501e-06	0.255545	1331	Intestine_age_gap		0.0146059
rs151000551	X	80167991	T	A	T	A	-1.44371	-0.0134	0.08333	0.1043	FALSE	TRUE	FALSE	finn-b-E4_DIABETES	0.0131		0.3073	3.80952e-06	0.312389	1331	Intestine_age_gap		0.0158168
rs1636440	7	101331242	T	C	T	C	-2.25024	0.0385	0.06236	0.0499	FALSE	FALSE	FALSE	finn-b-E4_DIABETES	0.0227		0.0891908	6.82171e-06	0.500145	1331	Intestine_age_gap		0.0150029
rs2045100	4	69533702	A	T	A	T	1.62623	-0.0128	0.1521	0.2957	FALSE	TRUE	FALSE	finn-b-E4_DIABETES	0.0109		0.2405	1.07577e-06	0.333431	1331	Intestine_age_gap		0.0175841
rs2876456	20	17406244	T	G	T	G	1.177	0.0139	0.3129	0.3822	FALSE	FALSE	FALSE	finn-b-E4_DIABETES	0.0101		0.1705	4.74949e-06	0.257237	1331	Intestine_age_gap		0.0155087
rs34820653	6	96030921	G	T	G	T	1.84869	-0.0203	0.0879	0.06036	FALSE	FALSE	FALSE	finn-b-E4_DIABETES	0.0206		0.3239	8.8599e-06	0.416064	1331	Intestine_age_gap		0.0146379
rs34907579	19	16428053	A	G	A	G	1.47606	0.0056	0.2787	0.2859	FALSE	FALSE	FALSE	finn-b-E4_DIABETES	0.0109		0.6086	6.08016e-08	0.272515	1331	Intestine_age_gap		0.0215982
rs6622298	X	107463272	T	A	T	A	0.857687	0.0056	0.3272	0.3128	FALSE	TRUE	FALSE	finn-b-E4_DIABETES	0.0087		0.5211	5.85855e-06	0.189275	1331	Intestine_age_gap		0.0152155
rs6761377	2	230571420	C	A	C	A	1.10128	-0.0039	0.4346	0.5071	FALSE	FALSE	FALSE	finn-b-E4_DIABETES	0.0098		0.6898	5.62658e-06	0.242574	1331	Intestine_age_gap		0.015272
rs680321	18	29797958	C	T	C	T	-3.0156	-0.0176	0.4722	0.4286	FALSE	FALSE	FALSE	finn-b-E4_DIABETES	0.0099		0.0761693	2.01562e-41	0.474051	1331	Intestine_age_gap		0.0295492
rs72713577	9	28521742	C	T	C	T	-1.82321	0.0183	0.1138	0.08676	FALSE	FALSE	FALSE	finn-b-E4_DIABETES	0.0177		0.301	4.4862e-06	0.397431	1331	Intestine_age_gap		0.0155884
rs7291273	22	45212829	A	C	A	C	-2.41758	0.037	0.0556	0.05261	FALSE	FALSE	FALSE	finn-b-E4_DIABETES	0.0222		0.0946303	4.84997e-06	0.528875	1331	Intestine_age_gap		0.0154794
rs73184769	3	175061183	G	A	G	A	2.17169	-0.0336	0.1044	0.149	FALSE	FALSE	FALSE	finn-b-E4_DIABETES	0.0138		0.0153299	1.32098e-07	0.411624	1331	Intestine_age_gap		0.0205148
rs7779453	7	19241659	T	C	T	C	-1.17124	-0.0111	0.4733	0.5354	FALSE	FALSE	FALSE	finn-b-E4_DIABETES	0.0099		0.2633	1.91081e-06	0.245924	1331	Intestine_age_gap		0.0167811
rs9959124	18	71065525	T	G	T	G	-1.0949	0.0056	0.3937	0.4071	FALSE	FALSE	FALSE	finn-b-E4_DIABETES	0.01		0.5771	9.59705e-06	0.247375	1331	Intestine_age_gap		0.0145263
rs10067080	5	157947408	T	C	T	C	1.24591	0.0561	0.2757	0.3273	FALSE	FALSE	FALSE	finn-b-E4_DM1_STRICT	0.0323		0.0829297	2.89818e-06	0.26634	1331	Intestine_age_gap		0.0161989
rs112971931	3	187269749	A	G	A	G	2.66801	0.0935	0.04884	0.03837	FALSE	FALSE	FALSE	finn-b-E4_DM1_STRICT	0.0822		0.2553	3.36e-06	0.574076	1331	Intestine_age_gap		0.0159923
rs11586128	1	14950102	T	C	T	C	1.2783	-0.0473	0.24	0.234	FALSE	FALSE	FALSE	finn-b-E4_DM1_STRICT	0.0359		0.1871	4.8758e-06	0.279711	1331	Intestine_age_gap		0.015472
rs12093040	1	222637341	A	G	A	G	1.1342	0.0284	0.3576	0.3347	FALSE	FALSE	FALSE	finn-b-E4_DM1_STRICT	0.0322		0.3777	9.06501e-06	0.255545	1331	Intestine_age_gap		0.0146059
rs151000551	X	80167991	T	A	T	A	-1.44371	0.0294	0.08333	0.1045	FALSE	TRUE	FALSE	finn-b-E4_DM1_STRICT	0.0406		0.4687	3.80952e-06	0.312389	1331	Intestine_age_gap		0.0158168
rs1636440	7	101331242	T	C	T	C	-2.25024	-0.0112	0.06236	0.0497	FALSE	FALSE	FALSE	finn-b-E4_DM1_STRICT	0.0702		0.8732	6.82171e-06	0.500145	1331	Intestine_age_gap		0.0150029
rs2045100	4	69533702	A	T	A	T	1.62623	0.0051	0.1521	0.2958	FALSE	TRUE	FALSE	finn-b-E4_DM1_STRICT	0.0336		0.8786	1.07577e-06	0.333431	1331	Intestine_age_gap		0.0175841
rs2876456	20	17406244	T	G	T	G	1.177	-0.0013	0.3129	0.3815	FALSE	FALSE	FALSE	finn-b-E4_DM1_STRICT	0.0313		0.9658	4.74949e-06	0.257237	1331	Intestine_age_gap		0.0155087
rs34820653	6	96030921	G	T	G	T	1.84869	0.0941	0.0879	0.0605	FALSE	FALSE	FALSE	finn-b-E4_DM1_STRICT	0.0638		0.1402	8.8599e-06	0.416064	1331	Intestine_age_gap		0.0146379
rs34907579	19	16428053	A	G	A	G	1.47606	0.0197	0.2787	0.2859	FALSE	FALSE	FALSE	finn-b-E4_DM1_STRICT	0.0337		0.558799	6.08016e-08	0.272515	1331	Intestine_age_gap		0.0215982
rs6622298	X	107463272	T	A	T	A	0.857687	0.0459	0.3272	0.3126	FALSE	TRUE	FALSE	finn-b-E4_DM1_STRICT	0.0269		0.0880805	5.85855e-06	0.189275	1331	Intestine_age_gap		0.0152155
rs6761377	2	230571420	C	A	C	A	1.10128	0.0005	0.4346	0.5072	FALSE	FALSE	FALSE	finn-b-E4_DM1_STRICT	0.0306		0.9864	5.62658e-06	0.242574	1331	Intestine_age_gap		0.015272
rs680321	18	29797958	C	T	C	T	-3.0156	0.0216	0.4722	0.4292	FALSE	FALSE	FALSE	finn-b-E4_DM1_STRICT	0.0306		0.4799	2.01562e-41	0.474051	1331	Intestine_age_gap		0.0295492
rs72713577	9	28521742	C	T	C	T	-1.82321	-0.0217	0.1138	0.08676	FALSE	FALSE	FALSE	finn-b-E4_DM1_STRICT	0.0542		0.6883	4.4862e-06	0.397431	1331	Intestine_age_gap		0.0155884
rs7291273	22	45212829	A	C	A	C	-2.41758	-0.022	0.0556	0.05245	FALSE	FALSE	FALSE	finn-b-E4_DM1_STRICT	0.0686		0.7486	4.84997e-06	0.528875	1331	Intestine_age_gap		0.0154794
rs73184769	3	175061183	G	A	G	A	2.17169	0.0142	0.1044	0.1493	FALSE	FALSE	FALSE	finn-b-E4_DM1_STRICT	0.043		0.7408	1.32098e-07	0.411624	1331	Intestine_age_gap		0.0205148
rs7779453	7	19241659	T	C	T	C	-1.17124	-0.0316	0.4733	0.5355	FALSE	FALSE	FALSE	finn-b-E4_DM1_STRICT	0.0304		0.2984	1.91081e-06	0.245924	1331	Intestine_age_gap		0.0167811
rs9959124	18	71065525	T	G	T	G	-1.0949	0.03	0.3937	0.4072	FALSE	FALSE	FALSE	finn-b-E4_DM1_STRICT	0.0311		0.3343	9.59705e-06	0.247375	1331	Intestine_age_gap		0.0145263
rs10067080	5	157947408	T	C	T	C	1.24591	-0.0035	0.2757	0.3271	FALSE	FALSE	FALSE	finn-b-E4_DM1COMA	0.0446		0.9366	2.89818e-06	0.26634	1331	Intestine_age_gap		0.0161989
rs112971931	3	187269749	A	G	A	G	2.66801	-0.2826	0.04884	0.03827	FALSE	FALSE	FALSE	finn-b-E4_DM1COMA	0.1156		0.0145201	3.36e-06	0.574076	1331	Intestine_age_gap		0.0159923
rs11586128	1	14950102	T	C	T	C	1.2783	0.118	0.24	0.2342	FALSE	FALSE	FALSE	finn-b-E4_DM1COMA	0.0493		0.0167598	4.8758e-06	0.279711	1331	Intestine_age_gap		0.015472
rs12093040	1	222637341	A	G	A	G	1.1342	-0.0137	0.3576	0.3346	FALSE	FALSE	FALSE	finn-b-E4_DM1COMA	0.0445		0.758	9.06501e-06	0.255545	1331	Intestine_age_gap		0.0146059
rs151000551	X	80167991	T	A	T	A	-1.44371	0.0003	0.08333	0.1044	FALSE	TRUE	FALSE	finn-b-E4_DM1COMA	0.0562		0.9958	3.80952e-06	0.312389	1331	Intestine_age_gap		0.0158168
rs1636440	7	101331242	T	C	T	C	-2.25024	0.181	0.06236	0.0498	FALSE	FALSE	FALSE	finn-b-E4_DM1COMA	0.0965		0.0606303	6.82171e-06	0.500145	1331	Intestine_age_gap		0.0150029
rs2045100	4	69533702	A	T	A	T	1.62623	0.0295	0.1521	0.2958	FALSE	TRUE	FALSE	finn-b-E4_DM1COMA	0.0461		0.5218	1.07577e-06	0.333431	1331	Intestine_age_gap		0.0175841
rs2876456	20	17406244	T	G	T	G	1.177	0.0098	0.3129	0.3815	FALSE	FALSE	FALSE	finn-b-E4_DM1COMA	0.0431		0.8206	4.74949e-06	0.257237	1331	Intestine_age_gap		0.0155087
rs34820653	6	96030921	G	T	G	T	1.84869	-0.065	0.0879	0.06037	FALSE	FALSE	FALSE	finn-b-E4_DM1COMA	0.0891		0.4659	8.8599e-06	0.416064	1331	Intestine_age_gap		0.0146379
rs34907579	19	16428053	A	G	A	G	1.47606	0.1068	0.2787	0.2859	FALSE	FALSE	FALSE	finn-b-E4_DM1COMA	0.0464		0.02119	6.08016e-08	0.272515	1331	Intestine_age_gap		0.0215982
rs6622298	X	107463272	T	A	T	A	0.857687	0.0348	0.3272	0.3124	FALSE	TRUE	FALSE	finn-b-E4_DM1COMA	0.0368		0.3444	5.85855e-06	0.189275	1331	Intestine_age_gap		0.0152155
rs6761377	2	230571420	C	A	C	A	1.10128	0.0329	0.4346	0.5073	FALSE	FALSE	FALSE	finn-b-E4_DM1COMA	0.0422		0.4365	5.62658e-06	0.242574	1331	Intestine_age_gap		0.015272
rs680321	18	29797958	C	T	C	T	-3.0156	0.0488	0.4722	0.4292	FALSE	FALSE	FALSE	finn-b-E4_DM1COMA	0.0423		0.2484	2.01562e-41	0.474051	1331	Intestine_age_gap		0.0295492
rs72713577	9	28521742	C	T	C	T	-1.82321	0.0624	0.1138	0.08677	FALSE	FALSE	FALSE	finn-b-E4_DM1COMA	0.0747		0.404	4.4862e-06	0.397431	1331	Intestine_age_gap		0.0155884
rs7291273	22	45212829	A	C	A	C	-2.41758	0.0214	0.0556	0.05243	FALSE	FALSE	FALSE	finn-b-E4_DM1COMA	0.0947		0.8216	4.84997e-06	0.528875	1331	Intestine_age_gap		0.0154794
rs73184769	3	175061183	G	A	G	A	2.17169	-0.0578	0.1044	0.1492	FALSE	FALSE	FALSE	finn-b-E4_DM1COMA	0.0592		0.3288	1.32098e-07	0.411624	1331	Intestine_age_gap		0.0205148
rs7779453	7	19241659	T	C	T	C	-1.17124	-0.0356	0.4733	0.5357	FALSE	FALSE	FALSE	finn-b-E4_DM1COMA	0.042		0.3964	1.91081e-06	0.245924	1331	Intestine_age_gap		0.0167811
rs9959124	18	71065525	T	G	T	G	-1.0949	0.0327	0.3937	0.4072	FALSE	FALSE	FALSE	finn-b-E4_DM1COMA	0.0429		0.4462	9.59705e-06	0.247375	1331	Intestine_age_gap		0.0145263
rs10067080	5	157947408	T	C	T	C	1.24591	-0.0051	0.2757	0.327	FALSE	FALSE	FALSE	finn-b-E4_DM2_STRICT	0.0115		0.655101	2.89818e-06	0.26634	1331	Intestine_age_gap		0.0161989
rs112971931	3	187269749	A	G	A	G	2.66801	0.0069	0.04884	0.03835	FALSE	FALSE	FALSE	finn-b-E4_DM2_STRICT	0.0291		0.814	3.36e-06	0.574076	1331	Intestine_age_gap		0.0159923
rs11586128	1	14950102	T	C	T	C	1.2783	0.0261	0.24	0.2346	FALSE	FALSE	FALSE	finn-b-E4_DM2_STRICT	0.0127		0.0401199	4.8758e-06	0.279711	1331	Intestine_age_gap		0.015472
rs12093040	1	222637341	A	G	A	G	1.1342	0.0029	0.3576	0.3347	FALSE	FALSE	FALSE	finn-b-E4_DM2_STRICT	0.0115		0.7988	9.06501e-06	0.255545	1331	Intestine_age_gap		0.0146059
rs151000551	X	80167991	T	A	T	A	-1.44371	-0.0185	0.08333	0.1042	FALSE	TRUE	FALSE	finn-b-E4_DM2_STRICT	0.0144		0.1985	3.80952e-06	0.312389	1331	Intestine_age_gap		0.0158168
rs1636440	7	101331242	T	C	T	C	-2.25024	0.0357	0.06236	0.0499	FALSE	FALSE	FALSE	finn-b-E4_DM2_STRICT	0.025		0.1542	6.82171e-06	0.500145	1331	Intestine_age_gap		0.0150029
rs2045100	4	69533702	A	T	A	T	1.62623	-0.0107	0.1521	0.2957	FALSE	TRUE	FALSE	finn-b-E4_DM2_STRICT	0.012		0.3744	1.07577e-06	0.333431	1331	Intestine_age_gap		0.0175841
rs2876456	20	17406244	T	G	T	G	1.177	0.0151	0.3129	0.3822	FALSE	FALSE	FALSE	finn-b-E4_DM2_STRICT	0.0111		0.1743	4.74949e-06	0.257237	1331	Intestine_age_gap		0.0155087
rs34820653	6	96030921	G	T	G	T	1.84869	-0.0421	0.0879	0.06024	FALSE	FALSE	FALSE	finn-b-E4_DM2_STRICT	0.0227		0.0640693	8.8599e-06	0.416064	1331	Intestine_age_gap		0.0146379
rs34907579	19	16428053	A	G	A	G	1.47606	0.0033	0.2787	0.2859	FALSE	FALSE	FALSE	finn-b-E4_DM2_STRICT	0.0121		0.785599	6.08016e-08	0.272515	1331	Intestine_age_gap		0.0215982
rs6622298	X	107463272	T	A	T	A	0.857687	-0.001	0.3272	0.3125	FALSE	TRUE	FALSE	finn-b-E4_DM2_STRICT	0.0095		0.917	5.85855e-06	0.189275	1331	Intestine_age_gap		0.0152155
rs6761377	2	230571420	C	A	C	A	1.10128	-0.0094	0.4346	0.507	FALSE	FALSE	FALSE	finn-b-E4_DM2_STRICT	0.0109		0.3856	5.62658e-06	0.242574	1331	Intestine_age_gap		0.015272
rs680321	18	29797958	C	T	C	T	-3.0156	-0.027	0.4722	0.4285	FALSE	FALSE	FALSE	finn-b-E4_DM2_STRICT	0.0109		0.0136	2.01562e-41	0.474051	1331	Intestine_age_gap		0.0295492
rs72713577	9	28521742	C	T	C	T	-1.82321	0.0231	0.1138	0.08674	FALSE	FALSE	FALSE	finn-b-E4_DM2_STRICT	0.0196		0.2364	4.4862e-06	0.397431	1331	Intestine_age_gap		0.0155884
rs7291273	22	45212829	A	C	A	C	-2.41758	0.0386	0.0556	0.05257	FALSE	FALSE	FALSE	finn-b-E4_DM2_STRICT	0.0245		0.1143	4.84997e-06	0.528875	1331	Intestine_age_gap		0.0154794
rs73184769	3	175061183	G	A	G	A	2.17169	-0.0406	0.1044	0.149	FALSE	FALSE	FALSE	finn-b-E4_DM2_STRICT	0.0153		0.00778108	1.32098e-07	0.411624	1331	Intestine_age_gap		0.0205148
rs7779453	7	19241659	T	C	T	C	-1.17124	-0.0054	0.4733	0.5355	FALSE	FALSE	FALSE	finn-b-E4_DM2_STRICT	0.0109		0.617401	1.91081e-06	0.245924	1331	Intestine_age_gap		0.0167811
rs9959124	18	71065525	T	G	T	G	-1.0949	0.0067	0.3937	0.4071	FALSE	FALSE	FALSE	finn-b-E4_DM2_STRICT	0.0111		0.5454	9.59705e-06	0.247375	1331	Intestine_age_gap		0.0145263
rs10067080	5	157947408	T	C	T	C	1.24591	-0.0213	0.2757	0.327	FALSE	FALSE	FALSE	finn-b-E4_DM2COMA	0.0338		0.5278	2.89818e-06	0.26634	1331	Intestine_age_gap		0.0161989
rs112971931	3	187269749	A	G	A	G	2.66801	0.043	0.04884	0.03837	FALSE	FALSE	FALSE	finn-b-E4_DM2COMA	0.0841		0.6093	3.36e-06	0.574076	1331	Intestine_age_gap		0.0159923
rs11586128	1	14950102	T	C	T	C	1.2783	0.0667	0.24	0.2342	FALSE	FALSE	FALSE	finn-b-E4_DM2COMA	0.0371		0.0724403	4.8758e-06	0.279711	1331	Intestine_age_gap		0.015472
rs12093040	1	222637341	A	G	A	G	1.1342	0.0305	0.3576	0.3348	FALSE	FALSE	FALSE	finn-b-E4_DM2COMA	0.0337		0.3659	9.06501e-06	0.255545	1331	Intestine_age_gap		0.0146059
rs151000551	X	80167991	T	A	T	A	-1.44371	-0.0736	0.08333	0.1043	FALSE	TRUE	FALSE	finn-b-E4_DM2COMA	0.0415		0.0760309	3.80952e-06	0.312389	1331	Intestine_age_gap		0.0158168
rs1636440	7	101331242	T	C	T	C	-2.25024	0.0828	0.06236	0.0498	FALSE	FALSE	FALSE	finn-b-E4_DM2COMA	0.0735		0.2598	6.82171e-06	0.500145	1331	Intestine_age_gap		0.0150029
rs2045100	4	69533702	A	T	A	T	1.62623	-0.0245	0.1521	0.2956	FALSE	TRUE	FALSE	finn-b-E4_DM2COMA	0.0354		0.4883	1.07577e-06	0.333431	1331	Intestine_age_gap		0.0175841
rs2876456	20	17406244	T	G	T	G	1.177	-0.002	0.3129	0.3815	FALSE	FALSE	FALSE	finn-b-E4_DM2COMA	0.0326		0.951	4.74949e-06	0.257237	1331	Intestine_age_gap		0.0155087
rs34820653	6	96030921	G	T	G	T	1.84869	-0.0399	0.0879	0.06041	FALSE	FALSE	FALSE	finn-b-E4_DM2COMA	0.0654		0.542	8.8599e-06	0.416064	1331	Intestine_age_gap		0.0146379
rs34907579	19	16428053	A	G	A	G	1.47606	-0.0248	0.2787	0.2857	FALSE	FALSE	FALSE	finn-b-E4_DM2COMA	0.0356		0.4857	6.08016e-08	0.272515	1331	Intestine_age_gap		0.0215982
rs6622298	X	107463272	T	A	T	A	0.857687	0.0066	0.3272	0.3124	FALSE	TRUE	FALSE	finn-b-E4_DM2COMA	0.0274		0.8081	5.85855e-06	0.189275	1331	Intestine_age_gap		0.0152155
rs6761377	2	230571420	C	A	C	A	1.10128	0.0762	0.4346	0.5074	FALSE	FALSE	FALSE	finn-b-E4_DM2COMA	0.0318		0.0165901	5.62658e-06	0.242574	1331	Intestine_age_gap		0.015272
rs680321	18	29797958	C	T	C	T	-3.0156	-0.048	0.4722	0.429	FALSE	FALSE	FALSE	finn-b-E4_DM2COMA	0.0319		0.1334	2.01562e-41	0.474051	1331	Intestine_age_gap		0.0295492
rs72713577	9	28521742	C	T	C	T	-1.82321	-0.0152	0.1138	0.08674	FALSE	FALSE	FALSE	finn-b-E4_DM2COMA	0.0565		0.7877	4.4862e-06	0.397431	1331	Intestine_age_gap		0.0155884
rs7291273	22	45212829	A	C	A	C	-2.41758	-0.0071	0.0556	0.05243	FALSE	FALSE	FALSE	finn-b-E4_DM2COMA	0.0718		0.9212	4.84997e-06	0.528875	1331	Intestine_age_gap		0.0154794
rs73184769	3	175061183	G	A	G	A	2.17169	-0.0041	0.1044	0.1493	FALSE	FALSE	FALSE	finn-b-E4_DM2COMA	0.0444		0.9258	1.32098e-07	0.411624	1331	Intestine_age_gap		0.0205148
rs7779453	7	19241659	T	C	T	C	-1.17124	-0.015	0.4733	0.5357	FALSE	FALSE	FALSE	finn-b-E4_DM2COMA	0.0319		0.6373	1.91081e-06	0.245924	1331	Intestine_age_gap		0.0167811
rs9959124	18	71065525	T	G	T	G	-1.0949	0.0608	0.3937	0.4072	FALSE	FALSE	FALSE	finn-b-E4_DM2COMA	0.0324		0.0608793	9.59705e-06	0.247375	1331	Intestine_age_gap		0.0145263
rs10067080	5	157947408	T	C	T	C	1.24591	-0.1486	0.2757	0.327	FALSE	FALSE	FALSE	finn-b-E4_DM2KETO	0.0813		0.0675896	2.89818e-06	0.26634	1331	Intestine_age_gap		0.0161989
rs112971931	3	187269749	A	G	A	G	2.66801	-0.0751	0.04884	0.03833	FALSE	FALSE	FALSE	finn-b-E4_DM2KETO	0.2057		0.715	3.36e-06	0.574076	1331	Intestine_age_gap		0.0159923
rs11586128	1	14950102	T	C	T	C	1.2783	-0.013	0.24	0.234	FALSE	FALSE	FALSE	finn-b-E4_DM2KETO	0.0901		0.8853	4.8758e-06	0.279711	1331	Intestine_age_gap		0.015472
rs12093040	1	222637341	A	G	A	G	1.1342	-0.1133	0.3576	0.3346	FALSE	FALSE	FALSE	finn-b-E4_DM2KETO	0.0814		0.1638	9.06501e-06	0.255545	1331	Intestine_age_gap		0.0146059
rs151000551	X	80167991	T	A	T	A	-1.44371	0.0313	0.08333	0.1044	FALSE	TRUE	FALSE	finn-b-E4_DM2KETO	0.0989		0.7515	3.80952e-06	0.312389	1331	Intestine_age_gap		0.0158168
rs1636440	7	101331242	T	C	T	C	-2.25024	0.076	0.06236	0.0498	FALSE	FALSE	FALSE	finn-b-E4_DM2KETO	0.1761		0.6663	6.82171e-06	0.500145	1331	Intestine_age_gap		0.0150029
rs2045100	4	69533702	A	T	A	T	1.62623	-0.022	0.1521	0.2957	FALSE	TRUE	FALSE	finn-b-E4_DM2KETO	0.0844		0.7948	1.07577e-06	0.333431	1331	Intestine_age_gap		0.0175841
rs2876456	20	17406244	T	G	T	G	1.177	-0.0567	0.3129	0.3815	FALSE	FALSE	FALSE	finn-b-E4_DM2KETO	0.0786		0.4711	4.74949e-06	0.257237	1331	Intestine_age_gap		0.0155087
rs34820653	6	96030921	G	T	G	T	1.84869	-0.0285	0.0879	0.0604	FALSE	FALSE	FALSE	finn-b-E4_DM2KETO	0.16		0.8587	8.8599e-06	0.416064	1331	Intestine_age_gap		0.0146379
rs34907579	19	16428053	A	G	A	G	1.47606	-0.0857	0.2787	0.2858	FALSE	FALSE	FALSE	finn-b-E4_DM2KETO	0.085		0.3134	6.08016e-08	0.272515	1331	Intestine_age_gap		0.0215982
rs6622298	X	107463272	T	A	T	A	0.857687	-0.028	0.3272	0.3123	FALSE	TRUE	FALSE	finn-b-E4_DM2KETO	0.0656		0.6694	5.85855e-06	0.189275	1331	Intestine_age_gap		0.0152155
rs6761377	2	230571420	C	A	C	A	1.10128	0.0361	0.4346	0.5072	FALSE	FALSE	FALSE	finn-b-E4_DM2KETO	0.0765		0.6369	5.62658e-06	0.242574	1331	Intestine_age_gap		0.015272
rs680321	18	29797958	C	T	C	T	-3.0156	-0.0093	0.4722	0.4292	FALSE	FALSE	FALSE	finn-b-E4_DM2KETO	0.0772		0.9043	2.01562e-41	0.474051	1331	Intestine_age_gap		0.0295492
rs72713577	9	28521742	C	T	C	T	-1.82321	0.0598	0.1138	0.08674	FALSE	FALSE	FALSE	finn-b-E4_DM2KETO	0.1374		0.6635	4.4862e-06	0.397431	1331	Intestine_age_gap		0.0155884
rs7291273	22	45212829	A	C	A	C	-2.41758	0.0566	0.0556	0.05244	FALSE	FALSE	FALSE	finn-b-E4_DM2KETO	0.1712		0.7411	4.84997e-06	0.528875	1331	Intestine_age_gap		0.0154794
rs73184769	3	175061183	G	A	G	A	2.17169	-0.1965	0.1044	0.1492	FALSE	FALSE	FALSE	finn-b-E4_DM2KETO	0.1073		0.0670595	1.32098e-07	0.411624	1331	Intestine_age_gap		0.0205148
rs7779453	7	19241659	T	C	T	C	-1.17124	-0.0419	0.4733	0.5357	FALSE	FALSE	FALSE	finn-b-E4_DM2KETO	0.0766		0.584901	1.91081e-06	0.245924	1331	Intestine_age_gap		0.0167811
rs9959124	18	71065525	T	G	T	G	-1.0949	-0.1254	0.3937	0.4071	FALSE	FALSE	FALSE	finn-b-E4_DM2KETO	0.0782		0.1086	9.59705e-06	0.247375	1331	Intestine_age_gap		0.0145263
rs10067080	5	157947408	T	C	T	C	1.24591	-0.0047	0.2757	0.327	FALSE	FALSE	FALSE	finn-b-E4_DM2NASCOMP	0.0124		0.704001	2.89818e-06	0.26634	1331	Intestine_age_gap		0.0161989
rs112971931	3	187269749	A	G	A	G	2.66801	0.0159	0.04884	0.03839	FALSE	FALSE	FALSE	finn-b-E4_DM2NASCOMP	0.0314		0.611899	3.36e-06	0.574076	1331	Intestine_age_gap		0.0159923
rs11586128	1	14950102	T	C	T	C	1.2783	0.0264	0.24	0.2345	FALSE	FALSE	FALSE	finn-b-E4_DM2NASCOMP	0.0138		0.0553299	4.8758e-06	0.279711	1331	Intestine_age_gap		0.015472
rs12093040	1	222637341	A	G	A	G	1.1342	-0.007	0.3576	0.3345	FALSE	FALSE	FALSE	finn-b-E4_DM2NASCOMP	0.0124		0.5737	9.06501e-06	0.255545	1331	Intestine_age_gap		0.0146059
rs151000551	X	80167991	T	A	T	A	-1.44371	-0.0118	0.08333	0.1044	FALSE	TRUE	FALSE	finn-b-E4_DM2NASCOMP	0.0155		0.4471	3.80952e-06	0.312389	1331	Intestine_age_gap		0.0158168
rs1636440	7	101331242	T	C	T	C	-2.25024	0.0338	0.06236	0.0498	FALSE	FALSE	FALSE	finn-b-E4_DM2NASCOMP	0.0271		0.2121	6.82171e-06	0.500145	1331	Intestine_age_gap		0.0150029
rs2045100	4	69533702	A	T	A	T	1.62623	-0.0188	0.1521	0.2956	FALSE	TRUE	FALSE	finn-b-E4_DM2NASCOMP	0.013		0.1475	1.07577e-06	0.333431	1331	Intestine_age_gap		0.0175841
rs2876456	20	17406244	T	G	T	G	1.177	0.015	0.3129	0.3821	FALSE	FALSE	FALSE	finn-b-E4_DM2NASCOMP	0.012		0.2129	4.74949e-06	0.257237	1331	Intestine_age_gap		0.0155087
rs34820653	6	96030921	G	T	G	T	1.84869	-0.0262	0.0879	0.06033	FALSE	FALSE	FALSE	finn-b-E4_DM2NASCOMP	0.0245		0.2861	8.8599e-06	0.416064	1331	Intestine_age_gap		0.0146379
rs34907579	19	16428053	A	G	A	G	1.47606	0.0023	0.2787	0.2859	FALSE	FALSE	FALSE	finn-b-E4_DM2NASCOMP	0.013		0.863	6.08016e-08	0.272515	1331	Intestine_age_gap		0.0215982
rs6622298	X	107463272	T	A	T	A	0.857687	-0.0022	0.3272	0.3125	FALSE	TRUE	FALSE	finn-b-E4_DM2NASCOMP	0.0102		0.8316	5.85855e-06	0.189275	1331	Intestine_age_gap		0.0152155
rs6761377	2	230571420	C	A	C	A	1.10128	-0.0015	0.4346	0.5072	FALSE	FALSE	FALSE	finn-b-E4_DM2NASCOMP	0.0117		0.8967	5.62658e-06	0.242574	1331	Intestine_age_gap		0.015272
rs680321	18	29797958	C	T	C	T	-3.0156	-0.0286	0.4722	0.4285	FALSE	FALSE	FALSE	finn-b-E4_DM2NASCOMP	0.0118		0.01536	2.01562e-41	0.474051	1331	Intestine_age_gap		0.0295492
rs72713577	9	28521742	C	T	C	T	-1.82321	0.0182	0.1138	0.08672	FALSE	FALSE	FALSE	finn-b-E4_DM2NASCOMP	0.0211		0.3899	4.4862e-06	0.397431	1331	Intestine_age_gap		0.0155884
rs7291273	22	45212829	A	C	A	C	-2.41758	0.0375	0.0556	0.05255	FALSE	FALSE	FALSE	finn-b-E4_DM2NASCOMP	0.0265		0.1559	4.84997e-06	0.528875	1331	Intestine_age_gap		0.0154794
rs73184769	3	175061183	G	A	G	A	2.17169	-0.0426	0.1044	0.149	FALSE	FALSE	FALSE	finn-b-E4_DM2NASCOMP	0.0165		0.00986597	1.32098e-07	0.411624	1331	Intestine_age_gap		0.0205148
rs7779453	7	19241659	T	C	T	C	-1.17124	0.0075	0.4733	0.5359	FALSE	FALSE	FALSE	finn-b-E4_DM2NASCOMP	0.0118		0.524499	1.91081e-06	0.245924	1331	Intestine_age_gap		0.0167811
rs9959124	18	71065525	T	G	T	G	-1.0949	0.0024	0.3937	0.407	FALSE	FALSE	FALSE	finn-b-E4_DM2NASCOMP	0.012		0.843	9.59705e-06	0.247375	1331	Intestine_age_gap		0.0145263
rs10067080	5	157947408	T	C	T	C	1.24591	0.0517	0.2757	0.3271	FALSE	FALSE	FALSE	finn-b-E4_DM2NEU	0.0519		0.3195	2.89818e-06	0.26634	1331	Intestine_age_gap		0.0161989
rs112971931	3	187269749	A	G	A	G	2.66801	0.0111	0.04884	0.03835	FALSE	FALSE	FALSE	finn-b-E4_DM2NEU	0.1275		0.9309	3.36e-06	0.574076	1331	Intestine_age_gap		0.0159923
rs11586128	1	14950102	T	C	T	C	1.2783	0.0621	0.24	0.2341	FALSE	FALSE	FALSE	finn-b-E4_DM2NEU	0.0571		0.2768	4.8758e-06	0.279711	1331	Intestine_age_gap		0.015472
rs12093040	1	222637341	A	G	A	G	1.1342	0.0466	0.3576	0.3347	FALSE	FALSE	FALSE	finn-b-E4_DM2NEU	0.0518		0.3688	9.06501e-06	0.255545	1331	Intestine_age_gap		0.0146059
rs151000551	X	80167991	T	A	T	A	-1.44371	0.0442	0.08333	0.1045	FALSE	TRUE	FALSE	finn-b-E4_DM2NEU	0.0612		0.4704	3.80952e-06	0.312389	1331	Intestine_age_gap		0.0158168
rs1636440	7	101331242	T	C	T	C	-2.25024	0.016	0.06236	0.0498	FALSE	FALSE	FALSE	finn-b-E4_DM2NEU	0.1147		0.8894	6.82171e-06	0.500145	1331	Intestine_age_gap		0.0150029
rs2045100	4	69533702	A	T	A	T	1.62623	0.0039	0.1521	0.2957	FALSE	TRUE	FALSE	finn-b-E4_DM2NEU	0.0547		0.9432	1.07577e-06	0.333431	1331	Intestine_age_gap		0.0175841
rs2876456	20	17406244	T	G	T	G	1.177	-0.0863	0.3129	0.3814	FALSE	FALSE	FALSE	finn-b-E4_DM2NEU	0.0502		0.0858302	4.74949e-06	0.257237	1331	Intestine_age_gap		0.0155087
rs34820653	6	96030921	G	T	G	T	1.84869	0.0225	0.0879	0.06043	FALSE	FALSE	FALSE	finn-b-E4_DM2NEU	0.0995		0.8213	8.8599e-06	0.416064	1331	Intestine_age_gap		0.0146379
rs34907579	19	16428053	A	G	A	G	1.47606	0.0944	0.2787	0.2859	FALSE	FALSE	FALSE	finn-b-E4_DM2NEU	0.0546		0.0839209	6.08016e-08	0.272515	1331	Intestine_age_gap		0.0215982
rs6622298	X	107463272	T	A	T	A	0.857687	0.0268	0.3272	0.3124	FALSE	TRUE	FALSE	finn-b-E4_DM2NEU	0.0408		0.5108	5.85855e-06	0.189275	1331	Intestine_age_gap		0.0152155
rs6761377	2	230571420	C	A	C	A	1.10128	0.0371	0.4346	0.5072	FALSE	FALSE	FALSE	finn-b-E4_DM2NEU	0.0489		0.4472	5.62658e-06	0.242574	1331	Intestine_age_gap		0.015272
rs680321	18	29797958	C	T	C	T	-3.0156	-0.0573	0.4722	0.4291	FALSE	FALSE	FALSE	finn-b-E4_DM2NEU	0.0491		0.2432	2.01562e-41	0.474051	1331	Intestine_age_gap		0.0295492
rs72713577	9	28521742	C	T	C	T	-1.82321	-0.1044	0.1138	0.0867	FALSE	FALSE	FALSE	finn-b-E4_DM2NEU	0.0871		0.2307	4.4862e-06	0.397431	1331	Intestine_age_gap		0.0155884
rs7291273	22	45212829	A	C	A	C	-2.41758	0.0709	0.0556	0.05244	FALSE	FALSE	FALSE	finn-b-E4_DM2NEU	0.1108		0.5221	4.84997e-06	0.528875	1331	Intestine_age_gap		0.0154794
rs73184769	3	175061183	G	A	G	A	2.17169	-0.0149	0.1044	0.1493	FALSE	FALSE	FALSE	finn-b-E4_DM2NEU	0.0685		0.8281	1.32098e-07	0.411624	1331	Intestine_age_gap		0.0205148
rs7779453	7	19241659	T	C	T	C	-1.17124	0.0013	0.4733	0.5357	FALSE	FALSE	FALSE	finn-b-E4_DM2NEU	0.0491		0.9785	1.91081e-06	0.245924	1331	Intestine_age_gap		0.0167811
rs9959124	18	71065525	T	G	T	G	-1.0949	0.0456	0.3937	0.4072	FALSE	FALSE	FALSE	finn-b-E4_DM2NEU	0.0495		0.3567	9.59705e-06	0.247375	1331	Intestine_age_gap		0.0145263
rs10067080	5	157947408	T	C	T	C	1.24591	-0.004	0.2757	0.327	FALSE	FALSE	FALSE	finn-b-E4_DM2NOCOMP	0.015		0.787501	2.89818e-06	0.26634	1331	Intestine_age_gap		0.0161989
rs112971931	3	187269749	A	G	A	G	2.66801	-0.0246	0.04884	0.03834	FALSE	FALSE	FALSE	finn-b-E4_DM2NOCOMP	0.0376		0.5121	3.36e-06	0.574076	1331	Intestine_age_gap		0.0159923
rs11586128	1	14950102	T	C	T	C	1.2783	0.0203	0.24	0.2343	FALSE	FALSE	FALSE	finn-b-E4_DM2NOCOMP	0.0165		0.219	4.8758e-06	0.279711	1331	Intestine_age_gap		0.015472
rs12093040	1	222637341	A	G	A	G	1.1342	0.0023	0.3576	0.3347	FALSE	FALSE	FALSE	finn-b-E4_DM2NOCOMP	0.0149		0.8782	9.06501e-06	0.255545	1331	Intestine_age_gap		0.0146059
rs151000551	X	80167991	T	A	T	A	-1.44371	-0.0269	0.08333	0.1043	FALSE	TRUE	FALSE	finn-b-E4_DM2NOCOMP	0.0185		0.146	3.80952e-06	0.312389	1331	Intestine_age_gap		0.0158168
rs1636440	7	101331242	T	C	T	C	-2.25024	0.0765	0.06236	0.0499	FALSE	FALSE	FALSE	finn-b-E4_DM2NOCOMP	0.0324		0.0183299	6.82171e-06	0.500145	1331	Intestine_age_gap		0.0150029
rs2045100	4	69533702	A	T	A	T	1.62623	-0.013	0.1521	0.2956	FALSE	TRUE	FALSE	finn-b-E4_DM2NOCOMP	0.0156		0.406	1.07577e-06	0.333431	1331	Intestine_age_gap		0.0175841
rs2876456	20	17406244	T	G	T	G	1.177	0.0193	0.3129	0.3818	FALSE	FALSE	FALSE	finn-b-E4_DM2NOCOMP	0.0145		0.1831	4.74949e-06	0.257237	1331	Intestine_age_gap		0.0155087
rs34820653	6	96030921	G	T	G	T	1.84869	-0.0135	0.0879	0.06046	FALSE	FALSE	FALSE	finn-b-E4_DM2NOCOMP	0.0293		0.6455	8.8599e-06	0.416064	1331	Intestine_age_gap		0.0146379
rs34907579	19	16428053	A	G	A	G	1.47606	0.0043	0.2787	0.2858	FALSE	FALSE	FALSE	finn-b-E4_DM2NOCOMP	0.0157		0.784401	6.08016e-08	0.272515	1331	Intestine_age_gap		0.0215982
rs6622298	X	107463272	T	A	T	A	0.857687	0.0037	0.3272	0.3125	FALSE	TRUE	FALSE	finn-b-E4_DM2NOCOMP	0.0122		0.7624	5.85855e-06	0.189275	1331	Intestine_age_gap		0.0152155
rs6761377	2	230571420	C	A	C	A	1.10128	0.0116	0.4346	0.5073	FALSE	FALSE	FALSE	finn-b-E4_DM2NOCOMP	0.0141		0.4114	5.62658e-06	0.242574	1331	Intestine_age_gap		0.015272
rs680321	18	29797958	C	T	C	T	-3.0156	-0.0145	0.4722	0.429	FALSE	FALSE	FALSE	finn-b-E4_DM2NOCOMP	0.0142		0.3052	2.01562e-41	0.474051	1331	Intestine_age_gap		0.0295492
rs72713577	9	28521742	C	T	C	T	-1.82321	0.0022	0.1138	0.08673	FALSE	FALSE	FALSE	finn-b-E4_DM2NOCOMP	0.0253		0.9312	4.4862e-06	0.397431	1331	Intestine_age_gap		0.0155884
rs7291273	22	45212829	A	C	A	C	-2.41758	0.0485	0.0556	0.05254	FALSE	FALSE	FALSE	finn-b-E4_DM2NOCOMP	0.0318		0.1275	4.84997e-06	0.528875	1331	Intestine_age_gap		0.0154794
rs73184769	3	175061183	G	A	G	A	2.17169	-0.0226	0.1044	0.1492	FALSE	FALSE	FALSE	finn-b-E4_DM2NOCOMP	0.0198		0.2523	1.32098e-07	0.411624	1331	Intestine_age_gap		0.0205148
rs7779453	7	19241659	T	C	T	C	-1.17124	0.0011	0.4733	0.5356	FALSE	FALSE	FALSE	finn-b-E4_DM2NOCOMP	0.0142		0.9397	1.91081e-06	0.245924	1331	Intestine_age_gap		0.0167811
rs9959124	18	71065525	T	G	T	G	-1.0949	-0.0047	0.3937	0.4069	FALSE	FALSE	FALSE	finn-b-E4_DM2NOCOMP	0.0144		0.743401	9.59705e-06	0.247375	1331	Intestine_age_gap		0.0145263
rs10067080	5	157947408	T	C	T	C	1.24591	0.0062	0.2757	0.3271	FALSE	FALSE	FALSE	finn-b-E4_DM2OPTH	0.0348		0.8586	2.89818e-06	0.26634	1331	Intestine_age_gap		0.0161989
rs112971931	3	187269749	A	G	A	G	2.66801	-0.0306	0.04884	0.03835	FALSE	FALSE	FALSE	finn-b-E4_DM2OPTH	0.0865		0.723099	3.36e-06	0.574076	1331	Intestine_age_gap		0.0159923
rs11586128	1	14950102	T	C	T	C	1.2783	0.0144	0.24	0.2341	FALSE	FALSE	FALSE	finn-b-E4_DM2OPTH	0.0384		0.707801	4.8758e-06	0.279711	1331	Intestine_age_gap		0.015472
rs12093040	1	222637341	A	G	A	G	1.1342	0.0485	0.3576	0.3348	FALSE	FALSE	FALSE	finn-b-E4_DM2OPTH	0.0347		0.1621	9.06501e-06	0.255545	1331	Intestine_age_gap		0.0146059
rs151000551	X	80167991	T	A	T	A	-1.44371	-0.0791	0.08333	0.1043	FALSE	TRUE	FALSE	finn-b-E4_DM2OPTH	0.0423		0.06142	3.80952e-06	0.312389	1331	Intestine_age_gap		0.0158168
rs1636440	7	101331242	T	C	T	C	-2.25024	-0.0002	0.06236	0.0497	FALSE	FALSE	FALSE	finn-b-E4_DM2OPTH	0.0764		0.9979	6.82171e-06	0.500145	1331	Intestine_age_gap		0.0150029
rs2045100	4	69533702	A	T	A	T	1.62623	-0.0748	0.1521	0.2955	FALSE	TRUE	FALSE	finn-b-E4_DM2OPTH	0.0365		0.0406996	1.07577e-06	0.333431	1331	Intestine_age_gap		0.0175841
rs2876456	20	17406244	T	G	T	G	1.177	-0.0245	0.3129	0.3814	FALSE	FALSE	FALSE	finn-b-E4_DM2OPTH	0.0337		0.4672	4.74949e-06	0.257237	1331	Intestine_age_gap		0.0155087
rs34820653	6	96030921	G	T	G	T	1.84869	-0.049	0.0879	0.0604	FALSE	FALSE	FALSE	finn-b-E4_DM2OPTH	0.0675		0.4678	8.8599e-06	0.416064	1331	Intestine_age_gap		0.0146379
rs34907579	19	16428053	A	G	A	G	1.47606	0.0354	0.2787	0.2858	FALSE	FALSE	FALSE	finn-b-E4_DM2OPTH	0.0365		0.3331	6.08016e-08	0.272515	1331	Intestine_age_gap		0.0215982
rs6622298	X	107463272	T	A	T	A	0.857687	0.0428	0.3272	0.3125	FALSE	TRUE	FALSE	finn-b-E4_DM2OPTH	0.0281		0.1272	5.85855e-06	0.189275	1331	Intestine_age_gap		0.0152155
rs6761377	2	230571420	C	A	C	A	1.10128	0.0165	0.4346	0.5072	FALSE	FALSE	FALSE	finn-b-E4_DM2OPTH	0.0327		0.614899	5.62658e-06	0.242574	1331	Intestine_age_gap		0.015272
rs680321	18	29797958	C	T	C	T	-3.0156	-0.0042	0.4722	0.4292	FALSE	FALSE	FALSE	finn-b-E4_DM2OPTH	0.0329		0.899	2.01562e-41	0.474051	1331	Intestine_age_gap		0.0295492
rs72713577	9	28521742	C	T	C	T	-1.82321	-0.1111	0.1138	0.08664	FALSE	FALSE	FALSE	finn-b-E4_DM2OPTH	0.0588		0.0589997	4.4862e-06	0.397431	1331	Intestine_age_gap		0.0155884
rs7291273	22	45212829	A	C	A	C	-2.41758	0.0093	0.0556	0.05243	FALSE	FALSE	FALSE	finn-b-E4_DM2OPTH	0.0742		0.9004	4.84997e-06	0.528875	1331	Intestine_age_gap		0.0154794
rs73184769	3	175061183	G	A	G	A	2.17169	-0.0758	0.1044	0.1492	FALSE	FALSE	FALSE	finn-b-E4_DM2OPTH	0.046		0.0991494	1.32098e-07	0.411624	1331	Intestine_age_gap		0.0205148
rs7779453	7	19241659	T	C	T	C	-1.17124	0.001	0.4733	0.5357	FALSE	FALSE	FALSE	finn-b-E4_DM2OPTH	0.0329		0.9752	1.91081e-06	0.245924	1331	Intestine_age_gap		0.0167811
rs9959124	18	71065525	T	G	T	G	-1.0949	0.09	0.3937	0.4073	FALSE	FALSE	FALSE	finn-b-E4_DM2OPTH	0.0334		0.00698892	9.59705e-06	0.247375	1331	Intestine_age_gap		0.0145263
rs10067080	5	157947408	T	C	T	C	1.24591	0.09	0.2757	0.3272	FALSE	FALSE	FALSE	finn-b-E4_DM2PERIPH	0.0484		0.0630798	2.89818e-06	0.26634	1331	Intestine_age_gap		0.0161989
rs112971931	3	187269749	A	G	A	G	2.66801	-0.2848	0.04884	0.03829	FALSE	FALSE	FALSE	finn-b-E4_DM2PERIPH	0.1223		0.01992	3.36e-06	0.574076	1331	Intestine_age_gap		0.0159923
rs11586128	1	14950102	T	C	T	C	1.2783	0.0113	0.24	0.2341	FALSE	FALSE	FALSE	finn-b-E4_DM2PERIPH	0.0534		0.8327	4.8758e-06	0.279711	1331	Intestine_age_gap		0.015472
rs12093040	1	222637341	A	G	A	G	1.1342	-0.0159	0.3576	0.3346	FALSE	FALSE	FALSE	finn-b-E4_DM2PERIPH	0.0483		0.7415	9.06501e-06	0.255545	1331	Intestine_age_gap		0.0146059
rs151000551	X	80167991	T	A	T	A	-1.44371	-0.0545	0.08333	0.1044	FALSE	TRUE	FALSE	finn-b-E4_DM2PERIPH	0.0574		0.3422	3.80952e-06	0.312389	1331	Intestine_age_gap		0.0158168
rs1636440	7	101331242	T	C	T	C	-2.25024	0.1238	0.06236	0.0498	FALSE	FALSE	FALSE	finn-b-E4_DM2PERIPH	0.1057		0.2417	6.82171e-06	0.500145	1331	Intestine_age_gap		0.0150029
rs2045100	4	69533702	A	T	A	T	1.62623	0.0322	0.1521	0.2957	FALSE	TRUE	FALSE	finn-b-E4_DM2PERIPH	0.0507		0.524901	1.07577e-06	0.333431	1331	Intestine_age_gap		0.0175841
rs2876456	20	17406244	T	G	T	G	1.177	0.0074	0.3129	0.3815	FALSE	FALSE	FALSE	finn-b-E4_DM2PERIPH	0.0468		0.8751	4.74949e-06	0.257237	1331	Intestine_age_gap		0.0155087
rs34820653	6	96030921	G	T	G	T	1.84869	-0.1033	0.0879	0.06038	FALSE	FALSE	FALSE	finn-b-E4_DM2PERIPH	0.0938		0.2706	8.8599e-06	0.416064	1331	Intestine_age_gap		0.0146379
rs34907579	19	16428053	A	G	A	G	1.47606	0.0443	0.2787	0.2858	FALSE	FALSE	FALSE	finn-b-E4_DM2PERIPH	0.0508		0.3839	6.08016e-08	0.272515	1331	Intestine_age_gap		0.0215982
rs6622298	X	107463272	T	A	T	A	0.857687	0.0605	0.3272	0.3125	FALSE	TRUE	FALSE	finn-b-E4_DM2PERIPH	0.0378		0.1098	5.85855e-06	0.189275	1331	Intestine_age_gap		0.0152155
rs6761377	2	230571420	C	A	C	A	1.10128	-0.0051	0.4346	0.5072	FALSE	FALSE	FALSE	finn-b-E4_DM2PERIPH	0.0456		0.9102	5.62658e-06	0.242574	1331	Intestine_age_gap		0.015272
rs680321	18	29797958	C	T	C	T	-3.0156	-0.0636	0.4722	0.4291	FALSE	FALSE	FALSE	finn-b-E4_DM2PERIPH	0.0459		0.1654	2.01562e-41	0.474051	1331	Intestine_age_gap		0.0295492
rs72713577	9	28521742	C	T	C	T	-1.82321	0.0437	0.1138	0.08674	FALSE	FALSE	FALSE	finn-b-E4_DM2PERIPH	0.082		0.5942	4.4862e-06	0.397431	1331	Intestine_age_gap		0.0155884
rs7291273	22	45212829	A	C	A	C	-2.41758	-0.0246	0.0556	0.05242	FALSE	FALSE	FALSE	finn-b-E4_DM2PERIPH	0.1036		0.8127	4.84997e-06	0.528875	1331	Intestine_age_gap		0.0154794
rs73184769	3	175061183	G	A	G	A	2.17169	-0.1418	0.1044	0.1492	FALSE	FALSE	FALSE	finn-b-E4_DM2PERIPH	0.0637		0.0259699	1.32098e-07	0.411624	1331	Intestine_age_gap		0.0205148
rs7779453	7	19241659	T	C	T	C	-1.17124	0.0905	0.4733	0.5358	FALSE	FALSE	FALSE	finn-b-E4_DM2PERIPH	0.0458		0.0483003	1.91081e-06	0.245924	1331	Intestine_age_gap		0.0167811
rs9959124	18	71065525	T	G	T	G	-1.0949	-0.1036	0.3937	0.4069	FALSE	FALSE	FALSE	finn-b-E4_DM2PERIPH	0.0465		0.0257899	9.59705e-06	0.247375	1331	Intestine_age_gap		0.0145263
rs10067080	5	157947408	T	C	T	C	1.24591	-0.0045	0.2757	0.3271	FALSE	FALSE	FALSE	finn-b-E4_DM2REN	0.0435		0.9183	2.89818e-06	0.26634	1331	Intestine_age_gap		0.0161989
rs112971931	3	187269749	A	G	A	G	2.66801	-0.1637	0.04884	0.03831	FALSE	FALSE	FALSE	finn-b-E4_DM2REN	0.1084		0.131	3.36e-06	0.574076	1331	Intestine_age_gap		0.0159923
rs11586128	1	14950102	T	C	T	C	1.2783	0.1193	0.24	0.2342	FALSE	FALSE	FALSE	finn-b-E4_DM2REN	0.0479		0.01279	4.8758e-06	0.279711	1331	Intestine_age_gap		0.015472
rs12093040	1	222637341	A	G	A	G	1.1342	-0.0024	0.3576	0.3347	FALSE	FALSE	FALSE	finn-b-E4_DM2REN	0.0434		0.9562	9.06501e-06	0.255545	1331	Intestine_age_gap		0.0146059
rs151000551	X	80167991	T	A	T	A	-1.44371	-0.0589	0.08333	0.1044	FALSE	TRUE	FALSE	finn-b-E4_DM2REN	0.0516		0.2538	3.80952e-06	0.312389	1331	Intestine_age_gap		0.0158168
rs1636440	7	101331242	T	C	T	C	-2.25024	0.0386	0.06236	0.0498	FALSE	FALSE	FALSE	finn-b-E4_DM2REN	0.0951		0.685001	6.82171e-06	0.500145	1331	Intestine_age_gap		0.0150029
rs2045100	4	69533702	A	T	A	T	1.62623	-0.0293	0.1521	0.2956	FALSE	TRUE	FALSE	finn-b-E4_DM2REN	0.0455		0.5198	1.07577e-06	0.333431	1331	Intestine_age_gap		0.0175841
rs2876456	20	17406244	T	G	T	G	1.177	0.0217	0.3129	0.3815	FALSE	FALSE	FALSE	finn-b-E4_DM2REN	0.042		0.6051	4.74949e-06	0.257237	1331	Intestine_age_gap		0.0155087
rs34820653	6	96030921	G	T	G	T	1.84869	-0.0729	0.0879	0.06039	FALSE	FALSE	FALSE	finn-b-E4_DM2REN	0.0845		0.3883	8.8599e-06	0.416064	1331	Intestine_age_gap		0.0146379
rs34907579	19	16428053	A	G	A	G	1.47606	0.024	0.2787	0.2858	FALSE	FALSE	FALSE	finn-b-E4_DM2REN	0.0457		0.6	6.08016e-08	0.272515	1331	Intestine_age_gap		0.0215982
rs6622298	X	107463272	T	A	T	A	0.857687	0.0208	0.3272	0.3124	FALSE	TRUE	FALSE	finn-b-E4_DM2REN	0.0341		0.542099	5.85855e-06	0.189275	1331	Intestine_age_gap		0.0152155
rs6761377	2	230571420	C	A	C	A	1.10128	0.0346	0.4346	0.5073	FALSE	FALSE	FALSE	finn-b-E4_DM2REN	0.0409		0.3975	5.62658e-06	0.242574	1331	Intestine_age_gap		0.015272
rs680321	18	29797958	C	T	C	T	-3.0156	0.0242	0.4722	0.4292	FALSE	FALSE	FALSE	finn-b-E4_DM2REN	0.0412		0.5569	2.01562e-41	0.474051	1331	Intestine_age_gap		0.0295492
rs72713577	9	28521742	C	T	C	T	-1.82321	0.0979	0.1138	0.08679	FALSE	FALSE	FALSE	finn-b-E4_DM2REN	0.0729		0.179	4.4862e-06	0.397431	1331	Intestine_age_gap		0.0155884
rs7291273	22	45212829	A	C	A	C	-2.41758	-0.0971	0.0556	0.05239	FALSE	FALSE	FALSE	finn-b-E4_DM2REN	0.0931		0.2966	4.84997e-06	0.528875	1331	Intestine_age_gap		0.0154794
rs73184769	3	175061183	G	A	G	A	2.17169	-0.0851	0.1044	0.1492	FALSE	FALSE	FALSE	finn-b-E4_DM2REN	0.0576		0.1396	1.32098e-07	0.411624	1331	Intestine_age_gap		0.0205148
rs7779453	7	19241659	T	C	T	C	-1.17124	-0.0161	0.4733	0.5357	FALSE	FALSE	FALSE	finn-b-E4_DM2REN	0.0411		0.6951	1.91081e-06	0.245924	1331	Intestine_age_gap		0.0167811
rs9959124	18	71065525	T	G	T	G	-1.0949	-0.0078	0.3937	0.4071	FALSE	FALSE	FALSE	finn-b-E4_DM2REN	0.0416		0.8506	9.59705e-06	0.247375	1331	Intestine_age_gap		0.0145263
rs10067080	5	157947408	T	C	T	C	1.24591	0.0006	0.2757	0.3273	FALSE	FALSE	FALSE	finn-b-FG_CVD	0.0083		0.9405	2.89818e-06	0.26634	1331	Intestine_age_gap		0.0161989
rs112971931	3	187269749	A	G	A	G	2.66801	-0.0301	0.04884	0.03841	FALSE	FALSE	FALSE	finn-b-FG_CVD	0.0211		0.1529	3.36e-06	0.574076	1331	Intestine_age_gap		0.0159923
rs11586128	1	14950102	T	C	T	C	1.2783	0.0143	0.24	0.2345	FALSE	FALSE	FALSE	finn-b-FG_CVD	0.0092		0.1221	4.8758e-06	0.279711	1331	Intestine_age_gap		0.015472
rs12093040	1	222637341	A	G	A	G	1.1342	0.0108	0.3576	0.3346	FALSE	FALSE	FALSE	finn-b-FG_CVD	0.0083		0.1964	9.06501e-06	0.255545	1331	Intestine_age_gap		0.0146059
rs151000551	X	80167991	T	A	T	A	-1.44371	-0.001	0.08333	0.1043	FALSE	TRUE	FALSE	finn-b-FG_CVD	0.0107		0.9262	3.80952e-06	0.312389	1331	Intestine_age_gap		0.0158168
rs1636440	7	101331242	T	C	T	C	-2.25024	0.0167	0.06236	0.0499	FALSE	FALSE	FALSE	finn-b-FG_CVD	0.0181		0.3568	6.82171e-06	0.500145	1331	Intestine_age_gap		0.0150029
rs2045100	4	69533702	A	T	A	T	1.62623	-0.0011	0.1521	0.2957	FALSE	TRUE	FALSE	finn-b-FG_CVD	0.0087		0.9003	1.07577e-06	0.333431	1331	Intestine_age_gap		0.0175841
rs2876456	20	17406244	T	G	T	G	1.177	0.0087	0.3129	0.3822	FALSE	FALSE	FALSE	finn-b-FG_CVD	0.0081		0.2791	4.74949e-06	0.257237	1331	Intestine_age_gap		0.0155087
rs34820653	6	96030921	G	T	G	T	1.84869	0.015	0.0879	0.06036	FALSE	FALSE	FALSE	finn-b-FG_CVD	0.0165		0.3621	8.8599e-06	0.416064	1331	Intestine_age_gap		0.0146379
rs34907579	19	16428053	A	G	A	G	1.47606	-0.002	0.2787	0.2859	FALSE	FALSE	FALSE	finn-b-FG_CVD	0.0087		0.8162	6.08016e-08	0.272515	1331	Intestine_age_gap		0.0215982
rs6622298	X	107463272	T	A	T	A	0.857687	-0.0027	0.3272	0.3128	FALSE	TRUE	FALSE	finn-b-FG_CVD	0.0071		0.698101	5.85855e-06	0.189275	1331	Intestine_age_gap		0.0152155
rs6761377	2	230571420	C	A	C	A	1.10128	-0.0033	0.4346	0.5071	FALSE	FALSE	FALSE	finn-b-FG_CVD	0.0079		0.673501	5.62658e-06	0.242574	1331	Intestine_age_gap		0.015272
rs680321	18	29797958	C	T	C	T	-3.0156	-0.0109	0.4722	0.4286	FALSE	FALSE	FALSE	finn-b-FG_CVD	0.0079		0.1676	2.01562e-41	0.474051	1331	Intestine_age_gap		0.0295492
rs72713577	9	28521742	C	T	C	T	-1.82321	0.0374	0.1138	0.08676	FALSE	FALSE	FALSE	finn-b-FG_CVD	0.0141		0.00811409	4.4862e-06	0.397431	1331	Intestine_age_gap		0.0155884
rs7291273	22	45212829	A	C	A	C	-2.41758	-0.0217	0.0556	0.05261	FALSE	FALSE	FALSE	finn-b-FG_CVD	0.0177		0.2196	4.84997e-06	0.528875	1331	Intestine_age_gap		0.0154794
rs73184769	3	175061183	G	A	G	A	2.17169	0.0137	0.1044	0.149	FALSE	FALSE	FALSE	finn-b-FG_CVD	0.0111		0.2162	1.32098e-07	0.411624	1331	Intestine_age_gap		0.0205148
rs7779453	7	19241659	T	C	T	C	-1.17124	0.0059	0.4733	0.5354	FALSE	FALSE	FALSE	finn-b-FG_CVD	0.0079		0.453799	1.91081e-06	0.245924	1331	Intestine_age_gap		0.0167811
rs9959124	18	71065525	T	G	T	G	-1.0949	-0.019	0.3937	0.4071	FALSE	FALSE	FALSE	finn-b-FG_CVD	0.008		0.0176901	9.59705e-06	0.247375	1331	Intestine_age_gap		0.0145263
rs10067080	5	157947408	T	C	T	C	1.24591	0.0015	0.2757	0.3273	FALSE	FALSE	FALSE	finn-b-I9_CVD	0.0082		0.8594	2.89818e-06	0.26634	1331	Intestine_age_gap		0.0161989
rs112971931	3	187269749	A	G	A	G	2.66801	-0.0341	0.04884	0.03841	FALSE	FALSE	FALSE	finn-b-I9_CVD	0.0207		0.0993299	3.36e-06	0.574076	1331	Intestine_age_gap		0.0159923
rs11586128	1	14950102	T	C	T	C	1.2783	0.0175	0.24	0.2345	FALSE	FALSE	FALSE	finn-b-I9_CVD	0.0091		0.0535797	4.8758e-06	0.279711	1331	Intestine_age_gap		0.015472
rs12093040	1	222637341	A	G	A	G	1.1342	0.0081	0.3576	0.3346	FALSE	FALSE	FALSE	finn-b-I9_CVD	0.0082		0.3209	9.06501e-06	0.255545	1331	Intestine_age_gap		0.0146059
rs151000551	X	80167991	T	A	T	A	-1.44371	0.0033	0.08333	0.1043	FALSE	TRUE	FALSE	finn-b-I9_CVD	0.0106		0.753199	3.80952e-06	0.312389	1331	Intestine_age_gap		0.0158168
rs1636440	7	101331242	T	C	T	C	-2.25024	0.02	0.06236	0.0499	FALSE	FALSE	FALSE	finn-b-I9_CVD	0.0178		0.2615	6.82171e-06	0.500145	1331	Intestine_age_gap		0.0150029
rs2045100	4	69533702	A	T	A	T	1.62623	0.0018	0.1521	0.2957	FALSE	TRUE	FALSE	finn-b-I9_CVD	0.0086		0.8317	1.07577e-06	0.333431	1331	Intestine_age_gap		0.0175841
rs2876456	20	17406244	T	G	T	G	1.177	0.0093	0.3129	0.3822	FALSE	FALSE	FALSE	finn-b-I9_CVD	0.0079		0.2401	4.74949e-06	0.257237	1331	Intestine_age_gap		0.0155087
rs34820653	6	96030921	G	T	G	T	1.84869	0.0146	0.0879	0.06036	FALSE	FALSE	FALSE	finn-b-I9_CVD	0.0162		0.3677	8.8599e-06	0.416064	1331	Intestine_age_gap		0.0146379
rs34907579	19	16428053	A	G	A	G	1.47606	-0.0065	0.2787	0.2859	FALSE	FALSE	FALSE	finn-b-I9_CVD	0.0086		0.4459	6.08016e-08	0.272515	1331	Intestine_age_gap		0.0215982
rs6622298	X	107463272	T	A	T	A	0.857687	-0.0076	0.3272	0.3128	FALSE	TRUE	FALSE	finn-b-I9_CVD	0.007		0.2794	5.85855e-06	0.189275	1331	Intestine_age_gap		0.0152155
rs6761377	2	230571420	C	A	C	A	1.10128	-0.0036	0.4346	0.5071	FALSE	FALSE	FALSE	finn-b-I9_CVD	0.0077		0.645199	5.62658e-06	0.242574	1331	Intestine_age_gap		0.015272
rs680321	18	29797958	C	T	C	T	-3.0156	-0.0138	0.4722	0.4286	FALSE	FALSE	FALSE	finn-b-I9_CVD	0.0078		0.0755197	2.01562e-41	0.474051	1331	Intestine_age_gap		0.0295492
rs72713577	9	28521742	C	T	C	T	-1.82321	0.0361	0.1138	0.08676	FALSE	FALSE	FALSE	finn-b-I9_CVD	0.0139		0.00940698	4.4862e-06	0.397431	1331	Intestine_age_gap		0.0155884
rs7291273	22	45212829	A	C	A	C	-2.41758	-0.0278	0.0556	0.05261	FALSE	FALSE	FALSE	finn-b-I9_CVD	0.0174		0.1105	4.84997e-06	0.528875	1331	Intestine_age_gap		0.0154794
rs73184769	3	175061183	G	A	G	A	2.17169	0.0148	0.1044	0.149	FALSE	FALSE	FALSE	finn-b-I9_CVD	0.0109		0.174	1.32098e-07	0.411624	1331	Intestine_age_gap		0.0205148
rs7779453	7	19241659	T	C	T	C	-1.17124	-0.0036	0.4733	0.5354	FALSE	FALSE	FALSE	finn-b-I9_CVD	0.0078		0.6405	1.91081e-06	0.245924	1331	Intestine_age_gap		0.0167811
rs9959124	18	71065525	T	G	T	G	-1.0949	-0.0208	0.3937	0.4071	FALSE	FALSE	FALSE	finn-b-I9_CVD	0.0079		0.008337	9.59705e-06	0.247375	1331	Intestine_age_gap		0.0145263
rs10067080	5	157947408	T	C	T	C	1.24591	-0.0168	0.2757	0.3273	FALSE	FALSE	FALSE	finn-b-I9_CVD_HARD	0.0116		0.1491	2.89818e-06	0.26634	1331	Intestine_age_gap		0.0161989
rs112971931	3	187269749	A	G	A	G	2.66801	-0.0054	0.04884	0.03841	FALSE	FALSE	FALSE	finn-b-I9_CVD_HARD	0.0294		0.8538	3.36e-06	0.574076	1331	Intestine_age_gap		0.0159923
rs11586128	1	14950102	T	C	T	C	1.2783	0.0216	0.24	0.2345	FALSE	FALSE	FALSE	finn-b-I9_CVD_HARD	0.0129		0.0937001	4.8758e-06	0.279711	1331	Intestine_age_gap		0.015472
rs12093040	1	222637341	A	G	A	G	1.1342	0.0166	0.3576	0.3346	FALSE	FALSE	FALSE	finn-b-I9_CVD_HARD	0.0116		0.1521	9.06501e-06	0.255545	1331	Intestine_age_gap		0.0146059
rs151000551	X	80167991	T	A	T	A	-1.44371	-0.0274	0.08333	0.1043	FALSE	TRUE	FALSE	finn-b-I9_CVD_HARD	0.0142		0.0539299	3.80952e-06	0.312389	1331	Intestine_age_gap		0.0158168
rs1636440	7	101331242	T	C	T	C	-2.25024	-0.0154	0.06236	0.0499	FALSE	FALSE	FALSE	finn-b-I9_CVD_HARD	0.0253		0.5413	6.82171e-06	0.500145	1331	Intestine_age_gap		0.0150029
rs2045100	4	69533702	A	T	A	T	1.62623	-0.0113	0.1521	0.2957	FALSE	TRUE	FALSE	finn-b-I9_CVD_HARD	0.0122		0.3551	1.07577e-06	0.333431	1331	Intestine_age_gap		0.0175841
rs2876456	20	17406244	T	G	T	G	1.177	-0.0037	0.3129	0.3822	FALSE	FALSE	FALSE	finn-b-I9_CVD_HARD	0.0113		0.7402	4.74949e-06	0.257237	1331	Intestine_age_gap		0.0155087
rs34820653	6	96030921	G	T	G	T	1.84869	0.0251	0.0879	0.06036	FALSE	FALSE	FALSE	finn-b-I9_CVD_HARD	0.0229		0.2742	8.8599e-06	0.416064	1331	Intestine_age_gap		0.0146379
rs34907579	19	16428053	A	G	A	G	1.47606	0.0105	0.2787	0.2859	FALSE	FALSE	FALSE	finn-b-I9_CVD_HARD	0.0122		0.3875	6.08016e-08	0.272515	1331	Intestine_age_gap		0.0215982
rs6622298	X	107463272	T	A	T	A	0.857687	-0.0011	0.3272	0.3128	FALSE	TRUE	FALSE	finn-b-I9_CVD_HARD	0.0094		0.9082	5.85855e-06	0.189275	1331	Intestine_age_gap		0.0152155
rs6761377	2	230571420	C	A	C	A	1.10128	0.0142	0.4346	0.5071	FALSE	FALSE	FALSE	finn-b-I9_CVD_HARD	0.011		0.1963	5.62658e-06	0.242574	1331	Intestine_age_gap		0.015272
rs680321	18	29797958	C	T	C	T	-3.0156	-0.0057	0.4722	0.4286	FALSE	FALSE	FALSE	finn-b-I9_CVD_HARD	0.011		0.6056	2.01562e-41	0.474051	1331	Intestine_age_gap		0.0295492
rs72713577	9	28521742	C	T	C	T	-1.82321	-0.0146	0.1138	0.08676	FALSE	FALSE	FALSE	finn-b-I9_CVD_HARD	0.0198		0.4613	4.4862e-06	0.397431	1331	Intestine_age_gap		0.0155884
rs7291273	22	45212829	A	C	A	C	-2.41758	-0.0392	0.0556	0.05261	FALSE	FALSE	FALSE	finn-b-I9_CVD_HARD	0.0248		0.1135	4.84997e-06	0.528875	1331	Intestine_age_gap		0.0154794
rs73184769	3	175061183	G	A	G	A	2.17169	0.0065	0.1044	0.149	FALSE	FALSE	FALSE	finn-b-I9_CVD_HARD	0.0154		0.674401	1.32098e-07	0.411624	1331	Intestine_age_gap		0.0205148
rs7779453	7	19241659	T	C	T	C	-1.17124	-0.0072	0.4733	0.5354	FALSE	FALSE	FALSE	finn-b-I9_CVD_HARD	0.011		0.5138	1.91081e-06	0.245924	1331	Intestine_age_gap		0.0167811
rs9959124	18	71065525	T	G	T	G	-1.0949	-0.0159	0.3937	0.4071	FALSE	FALSE	FALSE	finn-b-I9_CVD_HARD	0.0112		0.1536	9.59705e-06	0.247375	1331	Intestine_age_gap		0.0145263
rs10067080	5	157947408	T	C	T	C	1.24591	-0.0221	0.2757	0.3274	FALSE	FALSE	FALSE	finn-b-I9_STR	0.0153		0.1474	2.89818e-06	0.26634	1331	Intestine_age_gap		0.0161989
rs112971931	3	187269749	A	G	A	G	2.66801	0.0298	0.04884	0.03847	FALSE	FALSE	FALSE	finn-b-I9_STR	0.0385		0.4393	3.36e-06	0.574076	1331	Intestine_age_gap		0.0159923
rs11586128	1	14950102	T	C	T	C	1.2783	0.021	0.24	0.2341	FALSE	FALSE	FALSE	finn-b-I9_STR	0.0169		0.2139	4.8758e-06	0.279711	1331	Intestine_age_gap		0.015472
rs12093040	1	222637341	A	G	A	G	1.1342	0.0108	0.3576	0.3345	FALSE	FALSE	FALSE	finn-b-I9_STR	0.0153		0.4793	9.06501e-06	0.255545	1331	Intestine_age_gap		0.0146059
rs151000551	X	80167991	T	A	T	A	-1.44371	-0.0183	0.08333	0.1042	FALSE	TRUE	FALSE	finn-b-I9_STR	0.019		0.3338	3.80952e-06	0.312389	1331	Intestine_age_gap		0.0158168
rs1636440	7	101331242	T	C	T	C	-2.25024	0	0.06236	0.05	FALSE	FALSE	FALSE	finn-b-I9_STR	0.0332		0.9996	6.82171e-06	0.500145	1331	Intestine_age_gap		0.0150029
rs2045100	4	69533702	A	T	A	T	1.62623	-0.0186	0.1521	0.2955	FALSE	TRUE	FALSE	finn-b-I9_STR	0.016		0.2448	1.07577e-06	0.333431	1331	Intestine_age_gap		0.0175841
rs2876456	20	17406244	T	G	T	G	1.177	0.004	0.3129	0.382	FALSE	FALSE	FALSE	finn-b-I9_STR	0.0148		0.7867	4.74949e-06	0.257237	1331	Intestine_age_gap		0.0155087
rs34820653	6	96030921	G	T	G	T	1.84869	-0.0094	0.0879	0.06029	FALSE	FALSE	FALSE	finn-b-I9_STR	0.03		0.753701	8.8599e-06	0.416064	1331	Intestine_age_gap		0.0146379
rs34907579	19	16428053	A	G	A	G	1.47606	-0.0004	0.2787	0.2859	FALSE	FALSE	FALSE	finn-b-I9_STR	0.016		0.9792	6.08016e-08	0.272515	1331	Intestine_age_gap		0.0215982
rs6622298	X	107463272	T	A	T	A	0.857687	0.0313	0.3272	0.3127	FALSE	TRUE	FALSE	finn-b-I9_STR	0.0125		0.01236	5.85855e-06	0.189275	1331	Intestine_age_gap		0.0152155
rs6761377	2	230571420	C	A	C	A	1.10128	0.021	0.4346	0.507	FALSE	FALSE	FALSE	finn-b-I9_STR	0.0144		0.1444	5.62658e-06	0.242574	1331	Intestine_age_gap		0.015272
rs680321	18	29797958	C	T	C	T	-3.0156	-0.0097	0.4722	0.4288	FALSE	FALSE	FALSE	finn-b-I9_STR	0.0145		0.5054	2.01562e-41	0.474051	1331	Intestine_age_gap		0.0295492
rs72713577	9	28521742	C	T	C	T	-1.82321	-0.0333	0.1138	0.08691	FALSE	FALSE	FALSE	finn-b-I9_STR	0.0258		0.1972	4.4862e-06	0.397431	1331	Intestine_age_gap		0.0155884
rs7291273	22	45212829	A	C	A	C	-2.41758	-0.0659	0.0556	0.05257	FALSE	FALSE	FALSE	finn-b-I9_STR	0.0325		0.0426904	4.84997e-06	0.528875	1331	Intestine_age_gap		0.0154794
rs73184769	3	175061183	G	A	G	A	2.17169	0.0058	0.1044	0.1488	FALSE	FALSE	FALSE	finn-b-I9_STR	0.0202		0.774	1.32098e-07	0.411624	1331	Intestine_age_gap		0.0205148
rs7779453	7	19241659	T	C	T	C	-1.17124	-0.0079	0.4733	0.5354	FALSE	FALSE	FALSE	finn-b-I9_STR	0.0145		0.5841	1.91081e-06	0.245924	1331	Intestine_age_gap		0.0167811
rs9959124	18	71065525	T	G	T	G	-1.0949	0.0017	0.3937	0.4072	FALSE	FALSE	FALSE	finn-b-I9_STR	0.0147		0.9069	9.59705e-06	0.247375	1331	Intestine_age_gap		0.0145263
rs10067080	5	157947408	T	C	T	C	1.24591	-0.0208	0.2757	0.3274	FALSE	FALSE	FALSE	finn-b-I9_STR_SAH	0.0148		0.1593	2.89818e-06	0.26634	1331	Intestine_age_gap		0.0161989
rs112971931	3	187269749	A	G	A	G	2.66801	0.0288	0.04884	0.03846	FALSE	FALSE	FALSE	finn-b-I9_STR_SAH	0.0373		0.4399	3.36e-06	0.574076	1331	Intestine_age_gap		0.0159923
rs11586128	1	14950102	T	C	T	C	1.2783	0.0243	0.24	0.2341	FALSE	FALSE	FALSE	finn-b-I9_STR_SAH	0.0164		0.1372	4.8758e-06	0.279711	1331	Intestine_age_gap		0.015472
rs12093040	1	222637341	A	G	A	G	1.1342	0.0056	0.3576	0.3345	FALSE	FALSE	FALSE	finn-b-I9_STR_SAH	0.0148		0.705399	9.06501e-06	0.255545	1331	Intestine_age_gap		0.0146059
rs151000551	X	80167991	T	A	T	A	-1.44371	-0.0149	0.08333	0.1043	FALSE	TRUE	FALSE	finn-b-I9_STR_SAH	0.0184		0.4185	3.80952e-06	0.312389	1331	Intestine_age_gap		0.0158168
rs1636440	7	101331242	T	C	T	C	-2.25024	-0.0008	0.06236	0.05	FALSE	FALSE	FALSE	finn-b-I9_STR_SAH	0.0321		0.9801	6.82171e-06	0.500145	1331	Intestine_age_gap		0.0150029
rs2045100	4	69533702	A	T	A	T	1.62623	-0.0188	0.1521	0.2955	FALSE	TRUE	FALSE	finn-b-I9_STR_SAH	0.0155		0.2239	1.07577e-06	0.333431	1331	Intestine_age_gap		0.0175841
rs2876456	20	17406244	T	G	T	G	1.177	0.0078	0.3129	0.382	FALSE	FALSE	FALSE	finn-b-I9_STR_SAH	0.0143		0.5855	4.74949e-06	0.257237	1331	Intestine_age_gap		0.0155087
rs34820653	6	96030921	G	T	G	T	1.84869	-0.0124	0.0879	0.06029	FALSE	FALSE	FALSE	finn-b-I9_STR_SAH	0.0291		0.6688	8.8599e-06	0.416064	1331	Intestine_age_gap		0.0146379
rs34907579	19	16428053	A	G	A	G	1.47606	0.0018	0.2787	0.2859	FALSE	FALSE	FALSE	finn-b-I9_STR_SAH	0.0155		0.9071	6.08016e-08	0.272515	1331	Intestine_age_gap		0.0215982
rs6622298	X	107463272	T	A	T	A	0.857687	0.025	0.3272	0.3127	FALSE	TRUE	FALSE	finn-b-I9_STR_SAH	0.0121		0.0394703	5.85855e-06	0.189275	1331	Intestine_age_gap		0.0152155
rs6761377	2	230571420	C	A	C	A	1.10128	0.0201	0.4346	0.507	FALSE	FALSE	FALSE	finn-b-I9_STR_SAH	0.0139		0.1498	5.62658e-06	0.242574	1331	Intestine_age_gap		0.015272
rs680321	18	29797958	C	T	C	T	-3.0156	-0.0116	0.4722	0.4288	FALSE	FALSE	FALSE	finn-b-I9_STR_SAH	0.014		0.4068	2.01562e-41	0.474051	1331	Intestine_age_gap		0.0295492
rs72713577	9	28521742	C	T	C	T	-1.82321	-0.0304	0.1138	0.0869	FALSE	FALSE	FALSE	finn-b-I9_STR_SAH	0.025		0.2237	4.4862e-06	0.397431	1331	Intestine_age_gap		0.0155884
rs7291273	22	45212829	A	C	A	C	-2.41758	-0.0566	0.0556	0.05258	FALSE	FALSE	FALSE	finn-b-I9_STR_SAH	0.0315		0.0721307	4.84997e-06	0.528875	1331	Intestine_age_gap		0.0154794
rs73184769	3	175061183	G	A	G	A	2.17169	0.0125	0.1044	0.1489	FALSE	FALSE	FALSE	finn-b-I9_STR_SAH	0.0196		0.523701	1.32098e-07	0.411624	1331	Intestine_age_gap		0.0205148
rs7779453	7	19241659	T	C	T	C	-1.17124	-0.0116	0.4733	0.5354	FALSE	FALSE	FALSE	finn-b-I9_STR_SAH	0.014		0.4063	1.91081e-06	0.245924	1331	Intestine_age_gap		0.0167811
rs9959124	18	71065525	T	G	T	G	-1.0949	-0.0048	0.3937	0.4072	FALSE	FALSE	FALSE	finn-b-I9_STR_SAH	0.0142		0.7345	9.59705e-06	0.247375	1331	Intestine_age_gap		0.0145263
rs10067080	5	157947408	T	C	T	C	1.24591	-0.0173	0.2757	0.3273	FALSE	FALSE	FALSE	finn-b-K11_FIBROCHIRLIV	0.0534		0.7457	2.89818e-06	0.26634	1331	Intestine_age_gap		0.0161989
rs112971931	3	187269749	A	G	A	G	2.66801	-0.091	0.04884	0.03846	FALSE	FALSE	FALSE	finn-b-K11_FIBROCHIRLIV	0.1353		0.5012	3.36e-06	0.574076	1331	Intestine_age_gap		0.0159923
rs11586128	1	14950102	T	C	T	C	1.2783	-0.0041	0.24	0.2345	FALSE	FALSE	FALSE	finn-b-K11_FIBROCHIRLIV	0.059		0.944	4.8758e-06	0.279711	1331	Intestine_age_gap		0.015472
rs12093040	1	222637341	A	G	A	G	1.1342	0.0493	0.3576	0.3346	FALSE	FALSE	FALSE	finn-b-K11_FIBROCHIRLIV	0.0532		0.3537	9.06501e-06	0.255545	1331	Intestine_age_gap		0.0146059
rs151000551	X	80167991	T	A	T	A	-1.44371	-0.0863	0.08333	0.1042	FALSE	TRUE	FALSE	finn-b-K11_FIBROCHIRLIV	0.0685		0.2075	3.80952e-06	0.312389	1331	Intestine_age_gap		0.0158168
rs1636440	7	101331242	T	C	T	C	-2.25024	0.1871	0.06236	0.05	FALSE	FALSE	FALSE	finn-b-K11_FIBROCHIRLIV	0.1157		0.1057	6.82171e-06	0.500145	1331	Intestine_age_gap		0.0150029
rs2045100	4	69533702	A	T	A	T	1.62623	-0.0301	0.1521	0.2957	FALSE	TRUE	FALSE	finn-b-K11_FIBROCHIRLIV	0.0556		0.587801	1.07577e-06	0.333431	1331	Intestine_age_gap		0.0175841
rs2876456	20	17406244	T	G	T	G	1.177	0.0225	0.3129	0.3822	FALSE	FALSE	FALSE	finn-b-K11_FIBROCHIRLIV	0.0516		0.663201	4.74949e-06	0.257237	1331	Intestine_age_gap		0.0155087
rs34820653	6	96030921	G	T	G	T	1.84869	-0.1083	0.0879	0.06029	FALSE	FALSE	FALSE	finn-b-K11_FIBROCHIRLIV	0.1052		0.3036	8.8599e-06	0.416064	1331	Intestine_age_gap		0.0146379
rs34907579	19	16428053	A	G	A	G	1.47606	0.1425	0.2787	0.2859	FALSE	FALSE	FALSE	finn-b-K11_FIBROCHIRLIV	0.0558		0.01065	6.08016e-08	0.272515	1331	Intestine_age_gap		0.0215982
rs6622298	X	107463272	T	A	T	A	0.857687	0.0467	0.3272	0.3128	FALSE	TRUE	FALSE	finn-b-K11_FIBROCHIRLIV	0.045		0.2998	5.85855e-06	0.189275	1331	Intestine_age_gap		0.0152155
rs6761377	2	230571420	C	A	C	A	1.10128	0.0305	0.4346	0.5071	FALSE	FALSE	FALSE	finn-b-K11_FIBROCHIRLIV	0.0503		0.5433	5.62658e-06	0.242574	1331	Intestine_age_gap		0.015272
rs680321	18	29797958	C	T	C	T	-3.0156	-0.0091	0.4722	0.4287	FALSE	FALSE	FALSE	finn-b-K11_FIBROCHIRLIV	0.0506		0.8571	2.01562e-41	0.474051	1331	Intestine_age_gap		0.0295492
rs72713577	9	28521742	C	T	C	T	-1.82321	0.0177	0.1138	0.08675	FALSE	FALSE	FALSE	finn-b-K11_FIBROCHIRLIV	0.0898		0.8435	4.4862e-06	0.397431	1331	Intestine_age_gap		0.0155884
rs7291273	22	45212829	A	C	A	C	-2.41758	-0.0367	0.0556	0.05256	FALSE	FALSE	FALSE	finn-b-K11_FIBROCHIRLIV	0.1133		0.7461	4.84997e-06	0.528875	1331	Intestine_age_gap		0.0154794
rs73184769	3	175061183	G	A	G	A	2.17169	0.0263	0.1044	0.1489	FALSE	FALSE	FALSE	finn-b-K11_FIBROCHIRLIV	0.0708		0.7104	1.32098e-07	0.411624	1331	Intestine_age_gap		0.0205148
rs7779453	7	19241659	T	C	T	C	-1.17124	-0.0302	0.4733	0.5355	FALSE	FALSE	FALSE	finn-b-K11_FIBROCHIRLIV	0.0504		0.5486	1.91081e-06	0.245924	1331	Intestine_age_gap		0.0167811
rs9959124	18	71065525	T	G	T	G	-1.0949	0.0183	0.3937	0.4072	FALSE	FALSE	FALSE	finn-b-K11_FIBROCHIRLIV	0.0512		0.720299	9.59705e-06	0.247375	1331	Intestine_age_gap		0.0145263
rs10067080	5	157947408	T	C	T	C	1.24591	0.0508	0.2757	0.3273	FALSE	FALSE	FALSE	finn-b-T1D_STRICT	0.0333		0.1275	2.89818e-06	0.26634	1331	Intestine_age_gap		0.0161989
rs112971931	3	187269749	A	G	A	G	2.66801	0.1266	0.04884	0.03838	FALSE	FALSE	FALSE	finn-b-T1D_STRICT	0.0846		0.1346	3.36e-06	0.574076	1331	Intestine_age_gap		0.0159923
rs11586128	1	14950102	T	C	T	C	1.2783	-0.0472	0.24	0.2339	FALSE	FALSE	FALSE	finn-b-T1D_STRICT	0.037		0.2013	4.8758e-06	0.279711	1331	Intestine_age_gap		0.015472
rs12093040	1	222637341	A	G	A	G	1.1342	0.0305	0.3576	0.3346	FALSE	FALSE	FALSE	finn-b-T1D_STRICT	0.0331		0.3576	9.06501e-06	0.255545	1331	Intestine_age_gap		0.0146059
rs151000551	X	80167991	T	A	T	A	-1.44371	0.0413	0.08333	0.1045	FALSE	TRUE	FALSE	finn-b-T1D_STRICT	0.0419		0.3244	3.80952e-06	0.312389	1331	Intestine_age_gap		0.0158168
rs1636440	7	101331242	T	C	T	C	-2.25024	-0.0119	0.06236	0.0497	FALSE	FALSE	FALSE	finn-b-T1D_STRICT	0.0723		0.8689	6.82171e-06	0.500145	1331	Intestine_age_gap		0.0150029
rs2045100	4	69533702	A	T	A	T	1.62623	-0.0032	0.1521	0.2958	FALSE	TRUE	FALSE	finn-b-T1D_STRICT	0.0346		0.9268	1.07577e-06	0.333431	1331	Intestine_age_gap		0.0175841
rs2876456	20	17406244	T	G	T	G	1.177	-0.0082	0.3129	0.3814	FALSE	FALSE	FALSE	finn-b-T1D_STRICT	0.0323		0.7985	4.74949e-06	0.257237	1331	Intestine_age_gap		0.0155087
rs34820653	6	96030921	G	T	G	T	1.84869	0.1061	0.0879	0.06049	FALSE	FALSE	FALSE	finn-b-T1D_STRICT	0.0658		0.107	8.8599e-06	0.416064	1331	Intestine_age_gap		0.0146379
rs34907579	19	16428053	A	G	A	G	1.47606	0.0294	0.2787	0.2858	FALSE	FALSE	FALSE	finn-b-T1D_STRICT	0.0347		0.3975	6.08016e-08	0.272515	1331	Intestine_age_gap		0.0215982
rs6622298	X	107463272	T	A	T	A	0.857687	0.0415	0.3272	0.3126	FALSE	TRUE	FALSE	finn-b-T1D_STRICT	0.0277		0.1343	5.85855e-06	0.189275	1331	Intestine_age_gap		0.0152155
rs6761377	2	230571420	C	A	C	A	1.10128	0.0081	0.4346	0.5073	FALSE	FALSE	FALSE	finn-b-T1D_STRICT	0.0316		0.7975	5.62658e-06	0.242574	1331	Intestine_age_gap		0.015272
rs680321	18	29797958	C	T	C	T	-3.0156	0.0255	0.4722	0.4293	FALSE	FALSE	FALSE	finn-b-T1D_STRICT	0.0315		0.4188	2.01562e-41	0.474051	1331	Intestine_age_gap		0.0295492
rs72713577	9	28521742	C	T	C	T	-1.82321	-0.0325	0.1138	0.08674	FALSE	FALSE	FALSE	finn-b-T1D_STRICT	0.0558		0.560701	4.4862e-06	0.397431	1331	Intestine_age_gap		0.0155884
rs7291273	22	45212829	A	C	A	C	-2.41758	-0.0254	0.0556	0.0524	FALSE	FALSE	FALSE	finn-b-T1D_STRICT	0.0706		0.7195	4.84997e-06	0.528875	1331	Intestine_age_gap		0.0154794
rs73184769	3	175061183	G	A	G	A	2.17169	0.0021	0.1044	0.1493	FALSE	FALSE	FALSE	finn-b-T1D_STRICT	0.0443		0.9628	1.32098e-07	0.411624	1331	Intestine_age_gap		0.0205148
rs7779453	7	19241659	T	C	T	C	-1.17124	-0.0333	0.4733	0.5357	FALSE	FALSE	FALSE	finn-b-T1D_STRICT	0.0313		0.2871	1.91081e-06	0.245924	1331	Intestine_age_gap		0.0167811
rs9959124	18	71065525	T	G	T	G	-1.0949	0.0171	0.3937	0.4072	FALSE	FALSE	FALSE	finn-b-T1D_STRICT	0.0321		0.593401	9.59705e-06	0.247375	1331	Intestine_age_gap		0.0145263
rs10067080	5	157947408	T	C	T	C	1.24591	0.0465	0.2757	0.3273	FALSE	FALSE	FALSE	finn-b-T1D_STRICT1	0.0349		0.1831	2.89818e-06	0.26634	1331	Intestine_age_gap		0.0161989
rs112971931	3	187269749	A	G	A	G	2.66801	0.1191	0.04884	0.03837	FALSE	FALSE	FALSE	finn-b-T1D_STRICT1	0.0886		0.1788	3.36e-06	0.574076	1331	Intestine_age_gap		0.0159923
rs11586128	1	14950102	T	C	T	C	1.2783	-0.0629	0.24	0.234	FALSE	FALSE	FALSE	finn-b-T1D_STRICT1	0.0387		0.1043	4.8758e-06	0.279711	1331	Intestine_age_gap		0.015472
rs12093040	1	222637341	A	G	A	G	1.1342	0.0097	0.3576	0.3346	FALSE	FALSE	FALSE	finn-b-T1D_STRICT1	0.0347		0.781	9.06501e-06	0.255545	1331	Intestine_age_gap		0.0146059
rs151000551	X	80167991	T	A	T	A	-1.44371	0.0555	0.08333	0.1046	FALSE	TRUE	FALSE	finn-b-T1D_STRICT1	0.0439		0.2059	3.80952e-06	0.312389	1331	Intestine_age_gap		0.0158168
rs1636440	7	101331242	T	C	T	C	-2.25024	-0.0059	0.06236	0.0497	FALSE	FALSE	FALSE	finn-b-T1D_STRICT1	0.0756		0.9378	6.82171e-06	0.500145	1331	Intestine_age_gap		0.0150029
rs2045100	4	69533702	A	T	A	T	1.62623	0.0107	0.1521	0.2956	FALSE	TRUE	FALSE	finn-b-T1D_STRICT1	0.0363		0.7674	1.07577e-06	0.333431	1331	Intestine_age_gap		0.0175841
rs2876456	20	17406244	T	G	T	G	1.177	0.0038	0.3129	0.3814	FALSE	FALSE	FALSE	finn-b-T1D_STRICT1	0.0338		0.9112	4.74949e-06	0.257237	1331	Intestine_age_gap		0.0155087
rs34820653	6	96030921	G	T	G	T	1.84869	0.1317	0.0879	0.06054	FALSE	FALSE	FALSE	finn-b-T1D_STRICT1	0.0689		0.0560402	8.8599e-06	0.416064	1331	Intestine_age_gap		0.0146379
rs34907579	19	16428053	A	G	A	G	1.47606	0.0209	0.2787	0.2858	FALSE	FALSE	FALSE	finn-b-T1D_STRICT1	0.0363		0.5651	6.08016e-08	0.272515	1331	Intestine_age_gap		0.0215982
rs6622298	X	107463272	T	A	T	A	0.857687	0.0542	0.3272	0.3127	FALSE	TRUE	FALSE	finn-b-T1D_STRICT1	0.029		0.0616794	5.85855e-06	0.189275	1331	Intestine_age_gap		0.0152155
rs6761377	2	230571420	C	A	C	A	1.10128	0.0204	0.4346	0.5073	FALSE	FALSE	FALSE	finn-b-T1D_STRICT1	0.0331		0.5387	5.62658e-06	0.242574	1331	Intestine_age_gap		0.015272
rs680321	18	29797958	C	T	C	T	-3.0156	0.032	0.4722	0.4293	FALSE	FALSE	FALSE	finn-b-T1D_STRICT1	0.033		0.3333	2.01562e-41	0.474051	1331	Intestine_age_gap		0.0295492
rs72713577	9	28521742	C	T	C	T	-1.82321	-0.0271	0.1138	0.08672	FALSE	FALSE	FALSE	finn-b-T1D_STRICT1	0.0584		0.6422	4.4862e-06	0.397431	1331	Intestine_age_gap		0.0155884
rs7291273	22	45212829	A	C	A	C	-2.41758	0.0012	0.0556	0.0524	FALSE	FALSE	FALSE	finn-b-T1D_STRICT1	0.0741		0.9868	4.84997e-06	0.528875	1331	Intestine_age_gap		0.0154794
rs73184769	3	175061183	G	A	G	A	2.17169	0.0105	0.1044	0.1493	FALSE	FALSE	FALSE	finn-b-T1D_STRICT1	0.0465		0.8221	1.32098e-07	0.411624	1331	Intestine_age_gap		0.0205148
rs7779453	7	19241659	T	C	T	C	-1.17124	-0.0358	0.4733	0.5357	FALSE	FALSE	FALSE	finn-b-T1D_STRICT1	0.0328		0.2749	1.91081e-06	0.245924	1331	Intestine_age_gap		0.0167811
rs9959124	18	71065525	T	G	T	G	-1.0949	0.0223	0.3937	0.4071	FALSE	FALSE	FALSE	finn-b-T1D_STRICT1	0.0336		0.507399	9.59705e-06	0.247375	1331	Intestine_age_gap		0.0145263
rs10067080	5	157947408	T	C	T	C	1.24591	0.1841	0.2757	0.3271	FALSE	FALSE	FALSE	finn-b-T1D_STRICT2	0.1542		0.2327	2.89818e-06	0.26634	1331	Intestine_age_gap		0.0161989
rs112971931	3	187269749	A	G	A	G	2.66801	0.2825	0.04884	0.03835	FALSE	FALSE	FALSE	finn-b-T1D_STRICT2	0.3978		0.4776	3.36e-06	0.574076	1331	Intestine_age_gap		0.0159923
rs11586128	1	14950102	T	C	T	C	1.2783	0.0255	0.24	0.2341	FALSE	FALSE	FALSE	finn-b-T1D_STRICT2	0.1706		0.8812	4.8758e-06	0.279711	1331	Intestine_age_gap		0.015472
rs12093040	1	222637341	A	G	A	G	1.1342	-0.021	0.3576	0.3346	FALSE	FALSE	FALSE	finn-b-T1D_STRICT2	0.1533		0.891	9.06501e-06	0.255545	1331	Intestine_age_gap		0.0146059
rs151000551	X	80167991	T	A	T	A	-1.44371	0.1966	0.08333	0.1045	FALSE	TRUE	FALSE	finn-b-T1D_STRICT2	0.1952		0.3138	3.80952e-06	0.312389	1331	Intestine_age_gap		0.0158168
rs1636440	7	101331242	T	C	T	C	-2.25024	-0.3117	0.06236	0.0497	FALSE	FALSE	FALSE	finn-b-T1D_STRICT2	0.3305		0.3455	6.82171e-06	0.500145	1331	Intestine_age_gap		0.0150029
rs2045100	4	69533702	A	T	A	T	1.62623	0.0115	0.1521	0.2955	FALSE	TRUE	FALSE	finn-b-T1D_STRICT2	0.1597		0.9426	1.07577e-06	0.333431	1331	Intestine_age_gap		0.0175841
rs2876456	20	17406244	T	G	T	G	1.177	-0.2915	0.3129	0.3814	FALSE	FALSE	FALSE	finn-b-T1D_STRICT2	0.1484		0.0494504	4.74949e-06	0.257237	1331	Intestine_age_gap		0.0155087
rs34820653	6	96030921	G	T	G	T	1.84869	0.1629	0.0879	0.06046	FALSE	FALSE	FALSE	finn-b-T1D_STRICT2	0.3088		0.5978	8.8599e-06	0.416064	1331	Intestine_age_gap		0.0146379
rs34907579	19	16428053	A	G	A	G	1.47606	0.0714	0.2787	0.2858	FALSE	FALSE	FALSE	finn-b-T1D_STRICT2	0.1601		0.6555	6.08016e-08	0.272515	1331	Intestine_age_gap		0.0215982
rs6622298	X	107463272	T	A	T	A	0.857687	-0.0904	0.3272	0.3124	FALSE	TRUE	FALSE	finn-b-T1D_STRICT2	0.1264		0.4747	5.85855e-06	0.189275	1331	Intestine_age_gap		0.0152155
rs6761377	2	230571420	C	A	C	A	1.10128	-0.3238	0.4346	0.5072	FALSE	FALSE	FALSE	finn-b-T1D_STRICT2	0.1463		0.02689	5.62658e-06	0.242574	1331	Intestine_age_gap		0.015272
rs680321	18	29797958	C	T	C	T	-3.0156	-0.0442	0.4722	0.4292	FALSE	FALSE	FALSE	finn-b-T1D_STRICT2	0.1452		0.761001	2.01562e-41	0.474051	1331	Intestine_age_gap		0.0295492
rs72713577	9	28521742	C	T	C	T	-1.82321	-0.1161	0.1138	0.08672	FALSE	FALSE	FALSE	finn-b-T1D_STRICT2	0.2603		0.6557	4.4862e-06	0.397431	1331	Intestine_age_gap		0.0155884
rs7291273	22	45212829	A	C	A	C	-2.41758	-0.3159	0.0556	0.05239	FALSE	FALSE	FALSE	finn-b-T1D_STRICT2	0.3237		0.3292	4.84997e-06	0.528875	1331	Intestine_age_gap		0.0154794
rs73184769	3	175061183	G	A	G	A	2.17169	0.1165	0.1044	0.1493	FALSE	FALSE	FALSE	finn-b-T1D_STRICT2	0.2046		0.569101	1.32098e-07	0.411624	1331	Intestine_age_gap		0.0205148
rs7779453	7	19241659	T	C	T	C	-1.17124	0.0098	0.4733	0.5358	FALSE	FALSE	FALSE	finn-b-T1D_STRICT2	0.1446		0.9457	1.91081e-06	0.245924	1331	Intestine_age_gap		0.0167811
rs9959124	18	71065525	T	G	T	G	-1.0949	0.0332	0.3937	0.4071	FALSE	FALSE	FALSE	finn-b-T1D_STRICT2	0.1474		0.822	9.59705e-06	0.247375	1331	Intestine_age_gap		0.0145263
rs10067080	5	157947408	T	C	T	C	1.24591	0.0426	0.2757	0.3274	FALSE	FALSE	FALSE	finn-b-T1D_WIDE	0.0211		0.0430101	2.89818e-06	0.26634	1331	Intestine_age_gap		0.0161989
rs112971931	3	187269749	A	G	A	G	2.66801	0.0431	0.04884	0.03842	FALSE	FALSE	FALSE	finn-b-T1D_WIDE	0.0527		0.4129	3.36e-06	0.574076	1331	Intestine_age_gap		0.0159923
rs11586128	1	14950102	T	C	T	C	1.2783	-0.0225	0.24	0.2339	FALSE	FALSE	FALSE	finn-b-T1D_WIDE	0.0233		0.3337	4.8758e-06	0.279711	1331	Intestine_age_gap		0.015472
rs12093040	1	222637341	A	G	A	G	1.1342	0.0037	0.3576	0.3346	FALSE	FALSE	FALSE	finn-b-T1D_WIDE	0.021		0.8615	9.06501e-06	0.255545	1331	Intestine_age_gap		0.0146059
rs151000551	X	80167991	T	A	T	A	-1.44371	-0.0116	0.08333	0.1044	FALSE	TRUE	FALSE	finn-b-T1D_WIDE	0.0262		0.6591	3.80952e-06	0.312389	1331	Intestine_age_gap		0.0158168
rs1636440	7	101331242	T	C	T	C	-2.25024	0.0364	0.06236	0.0498	FALSE	FALSE	FALSE	finn-b-T1D_WIDE	0.0459		0.4277	6.82171e-06	0.500145	1331	Intestine_age_gap		0.0150029
rs2045100	4	69533702	A	T	A	T	1.62623	-0.0171	0.1521	0.2956	FALSE	TRUE	FALSE	finn-b-T1D_WIDE	0.022		0.4358	1.07577e-06	0.333431	1331	Intestine_age_gap		0.0175841
rs2876456	20	17406244	T	G	T	G	1.177	-0.0107	0.3129	0.3813	FALSE	FALSE	FALSE	finn-b-T1D_WIDE	0.0204		0.5992	4.74949e-06	0.257237	1331	Intestine_age_gap		0.0155087
rs34820653	6	96030921	G	T	G	T	1.84869	0.0125	0.0879	0.0605	FALSE	FALSE	FALSE	finn-b-T1D_WIDE	0.0412		0.7615	8.8599e-06	0.416064	1331	Intestine_age_gap		0.0146379
rs34907579	19	16428053	A	G	A	G	1.47606	0.0255	0.2787	0.2859	FALSE	FALSE	FALSE	finn-b-T1D_WIDE	0.0221		0.2484	6.08016e-08	0.272515	1331	Intestine_age_gap		0.0215982
rs6622298	X	107463272	T	A	T	A	0.857687	0.0301	0.3272	0.3127	FALSE	TRUE	FALSE	finn-b-T1D_WIDE	0.0174		0.0836797	5.85855e-06	0.189275	1331	Intestine_age_gap		0.0152155
rs6761377	2	230571420	C	A	C	A	1.10128	0.0349	0.4346	0.5074	FALSE	FALSE	FALSE	finn-b-T1D_WIDE	0.0199		0.0795005	5.62658e-06	0.242574	1331	Intestine_age_gap		0.015272
rs680321	18	29797958	C	T	C	T	-3.0156	0.0228	0.4722	0.4294	FALSE	FALSE	FALSE	finn-b-T1D_WIDE	0.02		0.253	2.01562e-41	0.474051	1331	Intestine_age_gap		0.0295492
rs72713577	9	28521742	C	T	C	T	-1.82321	-0.0069	0.1138	0.08676	FALSE	FALSE	FALSE	finn-b-T1D_WIDE	0.0354		0.8463	4.4862e-06	0.397431	1331	Intestine_age_gap		0.0155884
rs7291273	22	45212829	A	C	A	C	-2.41758	0.0121	0.0556	0.05242	FALSE	FALSE	FALSE	finn-b-T1D_WIDE	0.0447		0.7865	4.84997e-06	0.528875	1331	Intestine_age_gap		0.0154794
rs73184769	3	175061183	G	A	G	A	2.17169	-0.0202	0.1044	0.1493	FALSE	FALSE	FALSE	finn-b-T1D_WIDE	0.0279		0.468	1.32098e-07	0.411624	1331	Intestine_age_gap		0.0205148
rs7779453	7	19241659	T	C	T	C	-1.17124	-0.0116	0.4733	0.5357	FALSE	FALSE	FALSE	finn-b-T1D_WIDE	0.0199		0.560899	1.91081e-06	0.245924	1331	Intestine_age_gap		0.0167811
rs9959124	18	71065525	T	G	T	G	-1.0949	0.0067	0.3937	0.4071	FALSE	FALSE	FALSE	finn-b-T1D_WIDE	0.0203		0.740099	9.59705e-06	0.247375	1331	Intestine_age_gap		0.0145263
rs10067080	5	157947408	T	C	T	C	1.24591	0.0265	0.2757	0.3273	FALSE	FALSE	FALSE	finn-b-T1D_WIDE1	0.0246		0.2808	2.89818e-06	0.26634	1331	Intestine_age_gap		0.0161989
rs112971931	3	187269749	A	G	A	G	2.66801	0.0592	0.04884	0.03839	FALSE	FALSE	FALSE	finn-b-T1D_WIDE1	0.0616		0.3366	3.36e-06	0.574076	1331	Intestine_age_gap		0.0159923
rs11586128	1	14950102	T	C	T	C	1.2783	-0.0339	0.24	0.234	FALSE	FALSE	FALSE	finn-b-T1D_WIDE1	0.0272		0.2123	4.8758e-06	0.279711	1331	Intestine_age_gap		0.015472
rs12093040	1	222637341	A	G	A	G	1.1342	-0.0056	0.3576	0.3345	FALSE	FALSE	FALSE	finn-b-T1D_WIDE1	0.0245		0.8196	9.06501e-06	0.255545	1331	Intestine_age_gap		0.0146059
rs151000551	X	80167991	T	A	T	A	-1.44371	0.0053	0.08333	0.1045	FALSE	TRUE	FALSE	finn-b-T1D_WIDE1	0.0307		0.8634	3.80952e-06	0.312389	1331	Intestine_age_gap		0.0158168
rs1636440	7	101331242	T	C	T	C	-2.25024	0.0731	0.06236	0.0498	FALSE	FALSE	FALSE	finn-b-T1D_WIDE1	0.0532		0.1693	6.82171e-06	0.500145	1331	Intestine_age_gap		0.0150029
rs2045100	4	69533702	A	T	A	T	1.62623	-0.0192	0.1521	0.2955	FALSE	TRUE	FALSE	finn-b-T1D_WIDE1	0.0256		0.454099	1.07577e-06	0.333431	1331	Intestine_age_gap		0.0175841
rs2876456	20	17406244	T	G	T	G	1.177	0.0067	0.3129	0.3814	FALSE	FALSE	FALSE	finn-b-T1D_WIDE1	0.0238		0.7783	4.74949e-06	0.257237	1331	Intestine_age_gap		0.0155087
rs34820653	6	96030921	G	T	G	T	1.84869	0.0526	0.0879	0.06055	FALSE	FALSE	FALSE	finn-b-T1D_WIDE1	0.0482		0.2747	8.8599e-06	0.416064	1331	Intestine_age_gap		0.0146379
rs34907579	19	16428053	A	G	A	G	1.47606	0.0023	0.2787	0.2858	FALSE	FALSE	FALSE	finn-b-T1D_WIDE1	0.0256		0.9274	6.08016e-08	0.272515	1331	Intestine_age_gap		0.0215982
rs6622298	X	107463272	T	A	T	A	0.857687	0.0419	0.3272	0.3128	FALSE	TRUE	FALSE	finn-b-T1D_WIDE1	0.0203		0.0390499	5.85855e-06	0.189275	1331	Intestine_age_gap		0.0152155
rs6761377	2	230571420	C	A	C	A	1.10128	0.028	0.4346	0.5074	FALSE	FALSE	FALSE	finn-b-T1D_WIDE1	0.0232		0.2284	5.62658e-06	0.242574	1331	Intestine_age_gap		0.015272
rs680321	18	29797958	C	T	C	T	-3.0156	0.0269	0.4722	0.4294	FALSE	FALSE	FALSE	finn-b-T1D_WIDE1	0.0233		0.2489	2.01562e-41	0.474051	1331	Intestine_age_gap		0.0295492
rs72713577	9	28521742	C	T	C	T	-1.82321	-0.0144	0.1138	0.08673	FALSE	FALSE	FALSE	finn-b-T1D_WIDE1	0.0412		0.726599	4.4862e-06	0.397431	1331	Intestine_age_gap		0.0155884
rs7291273	22	45212829	A	C	A	C	-2.41758	0.0248	0.0556	0.05245	FALSE	FALSE	FALSE	finn-b-T1D_WIDE1	0.0519		0.6321	4.84997e-06	0.528875	1331	Intestine_age_gap		0.0154794
rs73184769	3	175061183	G	A	G	A	2.17169	-0.0506	0.1044	0.1492	FALSE	FALSE	FALSE	finn-b-T1D_WIDE1	0.0326		0.1211	1.32098e-07	0.411624	1331	Intestine_age_gap		0.0205148
rs7779453	7	19241659	T	C	T	C	-1.17124	-0.0211	0.4733	0.5357	FALSE	FALSE	FALSE	finn-b-T1D_WIDE1	0.0231		0.3612	1.91081e-06	0.245924	1331	Intestine_age_gap		0.0167811
rs9959124	18	71065525	T	G	T	G	-1.0949	0.0085	0.3937	0.4071	FALSE	FALSE	FALSE	finn-b-T1D_WIDE1	0.0237		0.718701	9.59705e-06	0.247375	1331	Intestine_age_gap		0.0145263
rs10067080	5	157947408	T	C	T	C	1.24591	0.0955	0.2757	0.3271	FALSE	FALSE	FALSE	finn-b-T1D_WIDE2	0.0849		0.2607	2.89818e-06	0.26634	1331	Intestine_age_gap		0.0161989
rs112971931	3	187269749	A	G	A	G	2.66801	-0.027	0.04884	0.03834	FALSE	FALSE	FALSE	finn-b-T1D_WIDE2	0.2149		0.8999	3.36e-06	0.574076	1331	Intestine_age_gap		0.0159923
rs11586128	1	14950102	T	C	T	C	1.2783	-0.1118	0.24	0.2341	FALSE	FALSE	FALSE	finn-b-T1D_WIDE2	0.0932		0.2303	4.8758e-06	0.279711	1331	Intestine_age_gap		0.015472
rs12093040	1	222637341	A	G	A	G	1.1342	0.0218	0.3576	0.3346	FALSE	FALSE	FALSE	finn-b-T1D_WIDE2	0.0847		0.7968	9.06501e-06	0.255545	1331	Intestine_age_gap		0.0146059
rs151000551	X	80167991	T	A	T	A	-1.44371	0.0224	0.08333	0.1045	FALSE	TRUE	FALSE	finn-b-T1D_WIDE2	0.107		0.834	3.80952e-06	0.312389	1331	Intestine_age_gap		0.0158168
rs1636440	7	101331242	T	C	T	C	-2.25024	-0.0208	0.06236	0.0497	FALSE	FALSE	FALSE	finn-b-T1D_WIDE2	0.1838		0.9097	6.82171e-06	0.500145	1331	Intestine_age_gap		0.0150029
rs2045100	4	69533702	A	T	A	T	1.62623	-0.0002	0.1521	0.2955	FALSE	TRUE	FALSE	finn-b-T1D_WIDE2	0.0886		0.9984	1.07577e-06	0.333431	1331	Intestine_age_gap		0.0175841
rs2876456	20	17406244	T	G	T	G	1.177	0.0057	0.3129	0.3814	FALSE	FALSE	FALSE	finn-b-T1D_WIDE2	0.0818		0.9445	4.74949e-06	0.257237	1331	Intestine_age_gap		0.0155087
rs34820653	6	96030921	G	T	G	T	1.84869	-0.099	0.0879	0.06045	FALSE	FALSE	FALSE	finn-b-T1D_WIDE2	0.1647		0.5479	8.8599e-06	0.416064	1331	Intestine_age_gap		0.0146379
rs34907579	19	16428053	A	G	A	G	1.47606	0.0655	0.2787	0.2858	FALSE	FALSE	FALSE	finn-b-T1D_WIDE2	0.0889		0.4614	6.08016e-08	0.272515	1331	Intestine_age_gap		0.0215982
rs6622298	X	107463272	T	A	T	A	0.857687	-0.0743	0.3272	0.3124	FALSE	TRUE	FALSE	finn-b-T1D_WIDE2	0.0701		0.2894	5.85855e-06	0.189275	1331	Intestine_age_gap		0.0152155
rs6761377	2	230571420	C	A	C	A	1.10128	0.0815	0.4346	0.5073	FALSE	FALSE	FALSE	finn-b-T1D_WIDE2	0.0802		0.3092	5.62658e-06	0.242574	1331	Intestine_age_gap		0.015272
rs680321	18	29797958	C	T	C	T	-3.0156	-0.0294	0.4722	0.4292	FALSE	FALSE	FALSE	finn-b-T1D_WIDE2	0.0801		0.7137	2.01562e-41	0.474051	1331	Intestine_age_gap		0.0295492
rs72713577	9	28521742	C	T	C	T	-1.82321	-0.1316	0.1138	0.0867	FALSE	FALSE	FALSE	finn-b-T1D_WIDE2	0.145		0.3641	4.4862e-06	0.397431	1331	Intestine_age_gap		0.0155884
rs7291273	22	45212829	A	C	A	C	-2.41758	-0.256	0.0556	0.05238	FALSE	FALSE	FALSE	finn-b-T1D_WIDE2	0.1815		0.1583	4.84997e-06	0.528875	1331	Intestine_age_gap		0.0154794
rs73184769	3	175061183	G	A	G	A	2.17169	0.0713	0.1044	0.1493	FALSE	FALSE	FALSE	finn-b-T1D_WIDE2	0.1112		0.5214	1.32098e-07	0.411624	1331	Intestine_age_gap		0.0205148
rs7779453	7	19241659	T	C	T	C	-1.17124	-0.0959	0.4733	0.5358	FALSE	FALSE	FALSE	finn-b-T1D_WIDE2	0.08		0.2305	1.91081e-06	0.245924	1331	Intestine_age_gap		0.0167811
rs9959124	18	71065525	T	G	T	G	-1.0949	-0.0292	0.3937	0.4071	FALSE	FALSE	FALSE	finn-b-T1D_WIDE2	0.0815		0.7204	9.59705e-06	0.247375	1331	Intestine_age_gap		0.0145263
rs10067080	5	157947408	T	C	T	C	1.24591	-0.0055	0.2757	0.3269	FALSE	FALSE	FALSE	finn-b-T2D	0.0115		0.630099	2.89818e-06	0.26634	1331	Intestine_age_gap		0.0161989
rs112971931	3	187269749	A	G	A	G	2.66801	0.0055	0.04884	0.03835	FALSE	FALSE	FALSE	finn-b-T2D	0.0291		0.8492	3.36e-06	0.574076	1331	Intestine_age_gap		0.0159923
rs11586128	1	14950102	T	C	T	C	1.2783	0.0255	0.24	0.2346	FALSE	FALSE	FALSE	finn-b-T2D	0.0127		0.0448405	4.8758e-06	0.279711	1331	Intestine_age_gap		0.015472
rs12093040	1	222637341	A	G	A	G	1.1342	0.0028	0.3576	0.3346	FALSE	FALSE	FALSE	finn-b-T2D	0.0115		0.8068	9.06501e-06	0.255545	1331	Intestine_age_gap		0.0146059
rs151000551	X	80167991	T	A	T	A	-1.44371	-0.0183	0.08333	0.1042	FALSE	TRUE	FALSE	finn-b-T2D	0.0144		0.2031	3.80952e-06	0.312389	1331	Intestine_age_gap		0.0158168
rs1636440	7	101331242	T	C	T	C	-2.25024	0.0365	0.06236	0.0498	FALSE	FALSE	FALSE	finn-b-T2D	0.025		0.145	6.82171e-06	0.500145	1331	Intestine_age_gap		0.0150029
rs2045100	4	69533702	A	T	A	T	1.62623	-0.0105	0.1521	0.2957	FALSE	TRUE	FALSE	finn-b-T2D	0.012		0.3822	1.07577e-06	0.333431	1331	Intestine_age_gap		0.0175841
rs2876456	20	17406244	T	G	T	G	1.177	0.0143	0.3129	0.3821	FALSE	FALSE	FALSE	finn-b-T2D	0.0111		0.1991	4.74949e-06	0.257237	1331	Intestine_age_gap		0.0155087
rs34820653	6	96030921	G	T	G	T	1.84869	-0.0426	0.0879	0.06025	FALSE	FALSE	FALSE	finn-b-T2D	0.0227		0.0605801	8.8599e-06	0.416064	1331	Intestine_age_gap		0.0146379
rs34907579	19	16428053	A	G	A	G	1.47606	0.0035	0.2787	0.2859	FALSE	FALSE	FALSE	finn-b-T2D	0.0121		0.771101	6.08016e-08	0.272515	1331	Intestine_age_gap		0.0215982
rs6622298	X	107463272	T	A	T	A	0.857687	-0.001	0.3272	0.3125	FALSE	TRUE	FALSE	finn-b-T2D	0.0095		0.9129	5.85855e-06	0.189275	1331	Intestine_age_gap		0.0152155
rs6761377	2	230571420	C	A	C	A	1.10128	-0.0095	0.4346	0.507	FALSE	FALSE	FALSE	finn-b-T2D	0.0109		0.3825	5.62658e-06	0.242574	1331	Intestine_age_gap		0.015272
rs680321	18	29797958	C	T	C	T	-3.0156	-0.0271	0.4722	0.4285	FALSE	FALSE	FALSE	finn-b-T2D	0.0109		0.0131199	2.01562e-41	0.474051	1331	Intestine_age_gap		0.0295492
rs72713577	9	28521742	C	T	C	T	-1.82321	0.0221	0.1138	0.08675	FALSE	FALSE	FALSE	finn-b-T2D	0.0195		0.2572	4.4862e-06	0.397431	1331	Intestine_age_gap		0.0155884
rs7291273	22	45212829	A	C	A	C	-2.41758	0.0389	0.0556	0.05255	FALSE	FALSE	FALSE	finn-b-T2D	0.0244		0.112	4.84997e-06	0.528875	1331	Intestine_age_gap		0.0154794
rs73184769	3	175061183	G	A	G	A	2.17169	-0.0417	0.1044	0.1491	FALSE	FALSE	FALSE	finn-b-T2D	0.0152		0.006188	1.32098e-07	0.411624	1331	Intestine_age_gap		0.0205148
rs7779453	7	19241659	T	C	T	C	-1.17124	-0.0058	0.4733	0.5356	FALSE	FALSE	FALSE	finn-b-T2D	0.0109		0.595899	1.91081e-06	0.245924	1331	Intestine_age_gap		0.0167811
rs9959124	18	71065525	T	G	T	G	-1.0949	0.0066	0.3937	0.4071	FALSE	FALSE	FALSE	finn-b-T2D	0.0111		0.5532	9.59705e-06	0.247375	1331	Intestine_age_gap		0.0145263
rs10067080	5	157947408	T	C	T	C	1.24591	-0.0022	0.2757	0.327	FALSE	FALSE	FALSE	finn-b-T2D_INCLAVO	0.0117		0.8472	2.89818e-06	0.26634	1331	Intestine_age_gap		0.0161989
rs112971931	3	187269749	A	G	A	G	2.66801	0.0033	0.04884	0.03837	FALSE	FALSE	FALSE	finn-b-T2D_INCLAVO	0.0294		0.9103	3.36e-06	0.574076	1331	Intestine_age_gap		0.0159923
rs11586128	1	14950102	T	C	T	C	1.2783	0.0296	0.24	0.2346	FALSE	FALSE	FALSE	finn-b-T2D_INCLAVO	0.0129		0.0215298	4.8758e-06	0.279711	1331	Intestine_age_gap		0.015472
rs12093040	1	222637341	A	G	A	G	1.1342	0.0036	0.3576	0.3347	FALSE	FALSE	FALSE	finn-b-T2D_INCLAVO	0.0116		0.7541	9.06501e-06	0.255545	1331	Intestine_age_gap		0.0146059
rs151000551	X	80167991	T	A	T	A	-1.44371	-0.0191	0.08333	0.1042	FALSE	TRUE	FALSE	finn-b-T2D_INCLAVO	0.0146		0.1903	3.80952e-06	0.312389	1331	Intestine_age_gap		0.0158168
rs1636440	7	101331242	T	C	T	C	-2.25024	0.0402	0.06236	0.0499	FALSE	FALSE	FALSE	finn-b-T2D_INCLAVO	0.0253		0.1122	6.82171e-06	0.500145	1331	Intestine_age_gap		0.0150029
rs2045100	4	69533702	A	T	A	T	1.62623	-0.01	0.1521	0.2956	FALSE	TRUE	FALSE	finn-b-T2D_INCLAVO	0.0122		0.4098	1.07577e-06	0.333431	1331	Intestine_age_gap		0.0175841
rs2876456	20	17406244	T	G	T	G	1.177	0.0133	0.3129	0.3821	FALSE	FALSE	FALSE	finn-b-T2D_INCLAVO	0.0113		0.2381	4.74949e-06	0.257237	1331	Intestine_age_gap		0.0155087
rs34820653	6	96030921	G	T	G	T	1.84869	-0.0432	0.0879	0.06023	FALSE	FALSE	FALSE	finn-b-T2D_INCLAVO	0.023		0.0599694	8.8599e-06	0.416064	1331	Intestine_age_gap		0.0146379
rs34907579	19	16428053	A	G	A	G	1.47606	0.0039	0.2787	0.2859	FALSE	FALSE	FALSE	finn-b-T2D_INCLAVO	0.0122		0.752101	6.08016e-08	0.272515	1331	Intestine_age_gap		0.0215982
rs6622298	X	107463272	T	A	T	A	0.857687	-0.0046	0.3272	0.3124	FALSE	TRUE	FALSE	finn-b-T2D_INCLAVO	0.0097		0.6351	5.85855e-06	0.189275	1331	Intestine_age_gap		0.0152155
rs6761377	2	230571420	C	A	C	A	1.10128	-0.0072	0.4346	0.507	FALSE	FALSE	FALSE	finn-b-T2D_INCLAVO	0.011		0.510199	5.62658e-06	0.242574	1331	Intestine_age_gap		0.015272
rs680321	18	29797958	C	T	C	T	-3.0156	-0.0267	0.4722	0.4287	FALSE	FALSE	FALSE	finn-b-T2D_INCLAVO	0.011		0.01583	2.01562e-41	0.474051	1331	Intestine_age_gap		0.0295492
rs72713577	9	28521742	C	T	C	T	-1.82321	0.0215	0.1138	0.08668	FALSE	FALSE	FALSE	finn-b-T2D_INCLAVO	0.0198		0.2769	4.4862e-06	0.397431	1331	Intestine_age_gap		0.0155884
rs7291273	22	45212829	A	C	A	C	-2.41758	0.044	0.0556	0.05257	FALSE	FALSE	FALSE	finn-b-T2D_INCLAVO	0.0247		0.0753894	4.84997e-06	0.528875	1331	Intestine_age_gap		0.0154794
rs73184769	3	175061183	G	A	G	A	2.17169	-0.0387	0.1044	0.149	FALSE	FALSE	FALSE	finn-b-T2D_INCLAVO	0.0154		0.0120501	1.32098e-07	0.411624	1331	Intestine_age_gap		0.0205148
rs7779453	7	19241659	T	C	T	C	-1.17124	-0.0055	0.4733	0.5355	FALSE	FALSE	FALSE	finn-b-T2D_INCLAVO	0.011		0.6151	1.91081e-06	0.245924	1331	Intestine_age_gap		0.0167811
rs9959124	18	71065525	T	G	T	G	-1.0949	0.0063	0.3937	0.4069	FALSE	FALSE	FALSE	finn-b-T2D_INCLAVO	0.0112		0.575999	9.59705e-06	0.247375	1331	Intestine_age_gap		0.0145263
rs10067080	5	157947408	T	C	T	C	1.24591	0.0013	0.2757	0.3272	FALSE	FALSE	FALSE	finn-b-T2D_WIDE	0.0139		0.9243	2.89818e-06	0.26634	1331	Intestine_age_gap		0.0161989
rs112971931	3	187269749	A	G	A	G	2.66801	0.0034	0.04884	0.03848	FALSE	FALSE	FALSE	finn-b-T2D_WIDE	0.0349		0.9221	3.36e-06	0.574076	1331	Intestine_age_gap		0.0159923
rs11586128	1	14950102	T	C	T	C	1.2783	0.0101	0.24	0.2343	FALSE	FALSE	FALSE	finn-b-T2D_WIDE	0.0154		0.513	4.8758e-06	0.279711	1331	Intestine_age_gap		0.015472
rs12093040	1	222637341	A	G	A	G	1.1342	0.0044	0.3576	0.3347	FALSE	FALSE	FALSE	finn-b-T2D_WIDE	0.0139		0.7533	9.06501e-06	0.255545	1331	Intestine_age_gap		0.0146059
rs151000551	X	80167991	T	A	T	A	-1.44371	-0.0354	0.08333	0.1042	FALSE	TRUE	FALSE	finn-b-T2D_WIDE	0.0173		0.0400396	3.80952e-06	0.312389	1331	Intestine_age_gap		0.0158168
rs1636440	7	101331242	T	C	T	C	-2.25024	0.0905	0.06236	0.05	FALSE	FALSE	FALSE	finn-b-T2D_WIDE	0.0302		0.00269898	6.82171e-06	0.500145	1331	Intestine_age_gap		0.0150029
rs2045100	4	69533702	A	T	A	T	1.62623	-0.0229	0.1521	0.2953	FALSE	TRUE	FALSE	finn-b-T2D_WIDE	0.0146		0.1163	1.07577e-06	0.333431	1331	Intestine_age_gap		0.0175841
rs2876456	20	17406244	T	G	T	G	1.177	0.0092	0.3129	0.3817	FALSE	FALSE	FALSE	finn-b-T2D_WIDE	0.0135		0.4954	4.74949e-06	0.257237	1331	Intestine_age_gap		0.0155087
rs34820653	6	96030921	G	T	G	T	1.84869	-0.0298	0.0879	0.06051	FALSE	FALSE	FALSE	finn-b-T2D_WIDE	0.0273		0.275	8.8599e-06	0.416064	1331	Intestine_age_gap		0.0146379
rs34907579	19	16428053	A	G	A	G	1.47606	0.0032	0.2787	0.2858	FALSE	FALSE	FALSE	finn-b-T2D_WIDE	0.0146		0.8283	6.08016e-08	0.272515	1331	Intestine_age_gap		0.0215982
rs6622298	X	107463272	T	A	T	A	0.857687	-0.0029	0.3272	0.3127	FALSE	TRUE	FALSE	finn-b-T2D_WIDE	0.0114		0.7965	5.85855e-06	0.189275	1331	Intestine_age_gap		0.0152155
rs6761377	2	230571420	C	A	C	A	1.10128	0.0061	0.4346	0.5073	FALSE	FALSE	FALSE	finn-b-T2D_WIDE	0.0131		0.6446	5.62658e-06	0.242574	1331	Intestine_age_gap		0.015272
rs680321	18	29797958	C	T	C	T	-3.0156	-0.0171	0.4722	0.4291	FALSE	FALSE	FALSE	finn-b-T2D_WIDE	0.0132		0.1949	2.01562e-41	0.474051	1331	Intestine_age_gap		0.0295492
rs72713577	9	28521742	C	T	C	T	-1.82321	-0.009	0.1138	0.08668	FALSE	FALSE	FALSE	finn-b-T2D_WIDE	0.0235		0.703701	4.4862e-06	0.397431	1331	Intestine_age_gap		0.0155884
rs7291273	22	45212829	A	C	A	C	-2.41758	0.0277	0.0556	0.05251	FALSE	FALSE	FALSE	finn-b-T2D_WIDE	0.0297		0.3501	4.84997e-06	0.528875	1331	Intestine_age_gap		0.0154794
rs73184769	3	175061183	G	A	G	A	2.17169	-0.0337	0.1044	0.1491	FALSE	FALSE	FALSE	finn-b-T2D_WIDE	0.0184		0.0673302	1.32098e-07	0.411624	1331	Intestine_age_gap		0.0205148
rs7779453	7	19241659	T	C	T	C	-1.17124	-0.0126	0.4733	0.5352	FALSE	FALSE	FALSE	finn-b-T2D_WIDE	0.0132		0.3388	1.91081e-06	0.245924	1331	Intestine_age_gap		0.0167811
rs9959124	18	71065525	T	G	T	G	-1.0949	0.0002	0.3937	0.4069	FALSE	FALSE	FALSE	finn-b-T2D_WIDE	0.0134		0.9876	9.59705e-06	0.247375	1331	Intestine_age_gap		0.0145263
rs10067080	5	157947408	T	C	T	C	1.24591	-0.000409747	0.2757	0.282453	FALSE	FALSE	FALSE	ukb-a-306	0.000577765	336473	0.478205	2.89818e-06	0.26634	1331	Intestine_age_gap	TRUE	0.0161989	1.49479e-06	TRUE	4.03123e-06
rs112971931	3	187269749	A	G	A	G	2.66801	-0.000928238	0.04884	0.0435737	FALSE	FALSE	FALSE	ukb-a-306	0.00127411	336473	0.466285	3.36e-06	0.574076	1331	Intestine_age_gap	TRUE	0.0159923	1.57745e-06	TRUE	4.68431e-06
rs11586128	1	14950102	T	C	T	C	1.2783	0.00117029	0.24	0.263858	FALSE	FALSE	FALSE	ukb-a-306	0.000593431	336473	0.0486015	4.8758e-06	0.279711	1331	Intestine_age_gap	TRUE	0.015472	1.15583e-05	TRUE	9.69591e-06
rs12093040	1	222637341	A	G	A	G	1.1342	-0.000942568	0.3576	0.364918	FALSE	FALSE	FALSE	ukb-a-306	0.000541326	336473	0.0816451	9.06501e-06	0.255545	1331	Intestine_age_gap	TRUE	0.0146059	9.01065e-06	TRUE	1.64804e-05
rs1636440	7	101331242	T	C	T	C	-2.25024	-0.000895304	0.06236	0.058882	FALSE	FALSE	FALSE	ukb-a-306	0.0011148	336473	0.421911	6.82171e-06	0.500145	1331	Intestine_age_gap	TRUE	0.0150029	1.9169e-06	TRUE	9.55695e-06
rs2045100	4	69533702	A	T	A	T	1.62623	0.00151902	0.1521	0.15682	FALSE	TRUE	FALSE	ukb-a-306	0.000728683	336473	0.0371056	1.07577e-06	0.333431	1331	Intestine_age_gap	TRUE	0.0175841	1.29151e-05	TRUE	2.3502e-06
rs2876456	20	17406244	T	G	T	G	1.177	0.000309985	0.3129	0.309534	FALSE	FALSE	FALSE	ukb-a-306	0.000565384	336473	0.583506	4.74949e-06	0.257237	1331	Intestine_age_gap	TRUE	0.0155087	8.93401e-07	TRUE	6.22615e-06
rs34820653	6	96030921	G	T	G	T	1.84869	-0.000555888	0.0879	0.0834715	FALSE	FALSE	FALSE	ukb-a-306	0.000940764	336473	0.554595	8.8599e-06	0.416064	1331	Intestine_age_gap	TRUE	0.0146379	1.03768e-06	TRUE	1.16032e-05
rs34907579	19	16428053	A	G	A	G	1.47606	-0.000288591	0.2787	0.279535	FALSE	FALSE	FALSE	ukb-a-306	0.000581587	336473	0.619745	6.08016e-08	0.272515	1331	Intestine_age_gap	TRUE	0.0215982	7.31793e-07	TRUE	8.6538e-08
rs6761377	2	230571420	C	A	C	A	1.10128	-0.000435914	0.4346	0.412665	FALSE	FALSE	FALSE	ukb-a-306	0.000535264	336473	0.415422	5.62658e-06	0.242574	1331	Intestine_age_gap	TRUE	0.015272	1.97114e-06	TRUE	7.94614e-06
rs680321	18	29797958	C	T	C	T	-3.0156	-0.000715465	0.4722	0.454758	FALSE	FALSE	FALSE	ukb-a-306	0.000523104	336473	0.171397	2.01562e-41	0.474051	1331	Intestine_age_gap	TRUE	0.0295492	5.55969e-06	TRUE	4.69708e-10
rs72713577	9	28521742	C	T	C	T	-1.82321	-0.000326858	0.1138	0.148666	FALSE	FALSE	FALSE	ukb-a-306	0.000739873	336473	0.658652	4.4862e-06	0.397431	1331	Intestine_age_gap	TRUE	0.0155884	5.80037e-07	TRUE	5.70489e-06
rs7291273	22	45212829	A	C	A	C	-2.41758	0.00209441	0.0556	0.0493878	FALSE	FALSE	FALSE	ukb-a-306	0.00123644	336473	0.0902838	4.84997e-06	0.528875	1331	Intestine_age_gap	TRUE	0.0154794	8.52758e-06	TRUE	8.89655e-06
rs73184769	3	175061183	G	A	G	A	2.17169	-0.000878852	0.1044	0.104596	FALSE	FALSE	FALSE	ukb-a-306	0.000859518	336473	0.306548	1.32098e-07	0.411624	1331	Intestine_age_gap	TRUE	0.0205148	3.10722e-06	TRUE	2.20421e-07
rs7779453	7	19241659	T	C	T	C	-1.17124	-9.95971e-05	0.4733	0.46343	FALSE	FALSE	FALSE	ukb-a-306	0.000523728	336473	0.849176	1.91081e-06	0.245924	1331	Intestine_age_gap	TRUE	0.0167811	1.07482e-07	TRUE	2.2883e-06
rs9959124	18	71065525	T	G	T	G	-1.0949	-0.000306589	0.3937	0.385575	FALSE	FALSE	FALSE	ukb-a-306	0.000539132	336473	0.56958	9.59705e-06	0.247375	1331	Intestine_age_gap	TRUE	0.0145263	9.61114e-07	TRUE	1.24671e-05
rs10067080	5	157947408	T	C	T	C	1.24591	-0.000442675	0.2757	0.282453	FALSE	FALSE	FALSE	ukb-a-63	0.000402503	337159	0.271418	2.89818e-06	0.26634	1331	Intestine_age_gap	TRUE	0.0161989	3.58755e-06	TRUE	4.53199e-06
rs112971931	3	187269749	A	G	A	G	2.66801	-0.000294127	0.04884	0.0435737	FALSE	FALSE	FALSE	ukb-a-63	0.000887727	337159	0.740399	3.36e-06	0.574076	1331	Intestine_age_gap	TRUE	0.0159923	3.25596e-07	TRUE	4.15656e-06
rs11586128	1	14950102	T	C	T	C	1.2783	-4.67024e-05	0.24	0.263858	FALSE	FALSE	FALSE	ukb-a-63	0.000413417	337159	0.910057	4.8758e-06	0.279711	1331	Intestine_age_gap	TRUE	0.015472	3.78503e-08	TRUE	5.61375e-06
rs12093040	1	222637341	A	G	A	G	1.1342	0.000965752	0.3576	0.364918	FALSE	FALSE	FALSE	ukb-a-63	0.000377102	337159	0.0104383	9.06501e-06	0.255545	1331	Intestine_age_gap	TRUE	0.0146059	1.94524e-05	TRUE	2.07473e-05
rs1636440	7	101331242	T	C	T	C	-2.25024	0.000179564	0.06236	0.058882	FALSE	FALSE	FALSE	ukb-a-63	0.000776607	337159	0.817147	6.82171e-06	0.500145	1331	Intestine_age_gap	TRUE	0.0150029	1.58564e-07	TRUE	8.08758e-06
rs2045100	4	69533702	A	T	A	T	1.62623	0.000551406	0.1521	0.15682	FALSE	TRUE	FALSE	ukb-a-63	0.000507654	337159	0.277398	1.07577e-06	0.333431	1331	Intestine_age_gap	TRUE	0.0175841	3.49924e-06	TRUE	1.72353e-06
rs2876456	20	17406244	T	G	T	G	1.177	4.93285e-05	0.3129	0.309534	FALSE	FALSE	FALSE	ukb-a-63	0.000393862	337159	0.900331	4.74949e-06	0.257237	1331	Intestine_age_gap	TRUE	0.0155087	4.65238e-08	TRUE	5.49064e-06
rs34820653	6	96030921	G	T	G	T	1.84869	0.000511473	0.0879	0.0834715	FALSE	FALSE	FALSE	ukb-a-63	0.000655479	337159	0.435213	8.8599e-06	0.416064	1331	Intestine_age_gap	TRUE	0.0146379	1.8059e-06	TRUE	1.22492e-05
rs34907579	19	16428053	A	G	A	G	1.47606	-6.95063e-05	0.2787	0.279535	FALSE	FALSE	FALSE	ukb-a-63	0.000405172	337159	0.863793	6.08016e-08	0.272515	1331	Intestine_age_gap	TRUE	0.0215982	8.72845e-08	TRUE	7.72974e-08
rs6761377	2	230571420	C	A	C	A	1.10128	9.86595e-07	0.4346	0.412665	FALSE	FALSE	FALSE	ukb-a-63	0.000372916	337159	0.997889	5.62658e-06	0.242574	1331	Intestine_age_gap	TRUE	0.015272	2.07598e-11	TRUE	6.25608e-06
rs680321	18	29797958	C	T	C	T	-3.0156	-0.000211951	0.4722	0.454758	FALSE	FALSE	FALSE	ukb-a-63	0.000364439	337159	0.560849	2.01562e-41	0.474051	1331	Intestine_age_gap	TRUE	0.0295492	1.0032e-06	TRUE	3.42386e-10
rs72713577	9	28521742	C	T	C	T	-1.82321	-6.94511e-05	0.1138	0.148666	FALSE	FALSE	FALSE	ukb-a-63	0.000515509	337159	0.892831	4.4862e-06	0.397431	1331	Intestine_age_gap	TRUE	0.0155884	5.38336e-08	TRUE	5.20575e-06
rs7291273	22	45212829	A	C	A	C	-2.41758	-0.000545649	0.0556	0.0493878	FALSE	FALSE	FALSE	ukb-a-63	0.000861569	337159	0.526525	4.84997e-06	0.528875	1331	Intestine_age_gap	TRUE	0.0154794	1.18964e-06	TRUE	6.51504e-06
rs73184769	3	175061183	G	A	G	A	2.17169	0.000456914	0.1044	0.104596	FALSE	FALSE	FALSE	ukb-a-63	0.000598858	337159	0.445479	1.32098e-07	0.411624	1331	Intestine_age_gap	TRUE	0.0205148	1.72659e-06	TRUE	2.01903e-07
rs7779453	7	19241659	T	C	T	C	-1.17124	-0.000326338	0.4733	0.46343	FALSE	FALSE	FALSE	ukb-a-63	0.000364879	337159	0.371122	1.91081e-06	0.245924	1331	Intestine_age_gap	TRUE	0.0167811	2.37249e-06	TRUE	2.84006e-06
rs9959124	18	71065525	T	G	T	G	-1.0949	-0.000442468	0.3937	0.385575	FALSE	FALSE	FALSE	ukb-a-63	0.000375599	337159	0.238784	9.59705e-06	0.247375	1331	Intestine_age_gap	TRUE	0.0145263	4.11605e-06	TRUE	1.48339e-05
rs10067080	5	157947408	T	C	T	C	1.24591	0.000366799	0.2757	0.282453	FALSE	FALSE	FALSE	ukb-a-75	0.000214323	337159	0.0870042	2.89818e-06	0.26634	1331	Intestine_age_gap	TRUE	0.0161989	8.68726e-06	TRUE	5.44024e-06
rs112971931	3	187269749	A	G	A	G	2.66801	-0.000223669	0.04884	0.0435737	FALSE	FALSE	FALSE	ukb-a-75	0.000472694	337159	0.636086	3.36e-06	0.574076	1331	Intestine_age_gap	TRUE	0.0159923	6.64078e-07	TRUE	4.33765e-06
rs11586128	1	14950102	T	C	T	C	1.2783	0.000418031	0.24	0.263858	FALSE	FALSE	FALSE	ukb-a-75	0.000220134	337159	0.0575678	4.8758e-06	0.279711	1331	Intestine_age_gap	TRUE	0.015472	1.06956e-05	TRUE	9.48609e-06
rs12093040	1	222637341	A	G	A	G	1.1342	-0.000129688	0.3576	0.364918	FALSE	FALSE	FALSE	ukb-a-75	0.0002008	337159	0.518373	9.06501e-06	0.255545	1331	Intestine_age_gap	TRUE	0.0146059	1.2372e-06	TRUE	1.20518e-05
rs1636440	7	101331242	T	C	T	C	-2.25024	0.000159809	0.06236	0.058882	FALSE	FALSE	FALSE	ukb-a-75	0.000413525	337159	0.699161	6.82171e-06	0.500145	1331	Intestine_age_gap	TRUE	0.0150029	4.42962e-07	TRUE	8.4628e-06
rs2045100	4	69533702	A	T	A	T	1.62623	0.000574647	0.1521	0.15682	FALSE	TRUE	FALSE	ukb-a-75	0.000270313	337159	0.0335158	1.07577e-06	0.333431	1331	Intestine_age_gap	TRUE	0.0175841	1.34039e-05	TRUE	2.37846e-06
rs2876456	20	17406244	T	G	T	G	1.177	-0.000221771	0.3129	0.309534	FALSE	FALSE	FALSE	ukb-a-75	0.000209722	337159	0.290306	4.74949e-06	0.257237	1331	Intestine_age_gap	TRUE	0.0155087	3.31656e-06	TRUE	7.23279e-06
rs34820653	6	96030921	G	T	G	T	1.84869	-0.000602136	0.0879	0.0834715	FALSE	FALSE	FALSE	ukb-a-75	0.000349026	337159	0.0844948	8.8599e-06	0.416064	1331	Intestine_age_gap	TRUE	0.0146379	8.8275e-06	TRUE	1.60384e-05
rs34907579	19	16428053	A	G	A	G	1.47606	-0.000135746	0.2787	0.279535	FALSE	FALSE	FALSE	ukb-a-75	0.000215744	337159	0.529221	6.08016e-08	0.272515	1331	Intestine_age_gap	TRUE	0.0215982	1.17421e-06	TRUE	9.05869e-08
rs6761377	2	230571420	C	A	C	A	1.10128	7.06158e-05	0.4346	0.412665	FALSE	FALSE	FALSE	ukb-a-75	0.000198569	337159	0.722123	5.62658e-06	0.242574	1331	Intestine_age_gap	TRUE	0.015272	3.75101e-07	TRUE	6.94277e-06
rs680321	18	29797958	C	T	C	T	-3.0156	-0.000106626	0.4722	0.454758	FALSE	FALSE	FALSE	ukb-a-75	0.000194055	337159	0.582689	2.01562e-41	0.474051	1331	Intestine_age_gap	TRUE	0.0295492	8.95455e-07	TRUE	3.37985e-10
rs72713577	9	28521742	C	T	C	T	-1.82321	-0.000203698	0.1138	0.148666	FALSE	FALSE	FALSE	ukb-a-75	0.000274496	337159	0.45804	4.4862e-06	0.397431	1331	Intestine_age_gap	TRUE	0.0155884	1.63331e-06	TRUE	6.23447e-06
rs7291273	22	45212829	A	C	A	C	-2.41758	0.000361848	0.0556	0.0493878	FALSE	FALSE	FALSE	ukb-a-75	0.000458766	337159	0.430263	4.84997e-06	0.528875	1331	Intestine_age_gap	TRUE	0.0154794	1.84517e-06	TRUE	6.82061e-06
rs73184769	3	175061183	G	A	G	A	2.17169	0.000112698	0.1044	0.104596	FALSE	FALSE	FALSE	ukb-a-75	0.000318878	337159	0.723772	1.32098e-07	0.411624	1331	Intestine_age_gap	TRUE	0.0205148	3.70468e-07	TRUE	1.75829e-07
rs7779453	7	19241659	T	C	T	C	-1.17124	-0.000168363	0.4733	0.46343	FALSE	FALSE	FALSE	ukb-a-75	0.00019429	337159	0.386186	1.91081e-06	0.245924	1331	Intestine_age_gap	TRUE	0.0167811	2.2272e-06	TRUE	2.81601e-06
rs9959124	18	71065525	T	G	T	G	-1.0949	3.41377e-05	0.3937	0.385575	FALSE	FALSE	FALSE	ukb-a-75	0.000199998	337159	0.864468	9.59705e-06	0.247375	1331	Intestine_age_gap	TRUE	0.0145263	8.64142e-08	TRUE	1.11163e-05
rs10067080	5	157947408	T	C	T	C	1.24591	-0.000402547	0.2757	0.279301	FALSE	FALSE	FALSE	ukb-b-11590	0.000346431	461880	0.25	2.89818e-06	0.26634	1331	Intestine_age_gap	TRUE	0.0161989	2.92328e-06	TRUE	4.33786e-06
rs112971931	3	187269749	A	G	A	G	2.66801	-2.93907e-05	0.04884	0.043408	FALSE	FALSE	FALSE	ukb-b-11590	0.000763586	461880	0.97	3.36e-06	0.574076	1331	Intestine_age_gap	TRUE	0.0159923	3.20757e-09	TRUE	3.7543e-06
rs11586128	1	14950102	T	C	T	C	1.2783	-4.2145e-05	0.24	0.264126	FALSE	FALSE	FALSE	ukb-b-11590	0.000354456	461880	0.91	4.8758e-06	0.279711	1331	Intestine_age_gap	TRUE	0.015472	3.06084e-08	TRUE	5.53125e-06
rs12093040	1	222637341	A	G	A	G	1.1342	0.000892546	0.3576	0.362124	FALSE	FALSE	FALSE	ukb-b-11590	0.000323958	461880	0.00589997	9.06501e-06	0.255545	1331	Intestine_age_gap	TRUE	0.0146059	1.64342e-05	TRUE	1.93793e-05
rs1636440	7	101331242	T	C	T	C	-2.25024	-0.000558979	0.06236	0.059193	FALSE	FALSE	FALSE	ukb-b-11590	0.000664635	461880	0.4	6.82171e-06	0.500145	1331	Intestine_age_gap	TRUE	0.0150029	1.53143e-06	TRUE	9.22107e-06
rs2045100	4	69533702	A	T	A	T	1.62623	0.000485005	0.1521	0.158372	FALSE	TRUE	FALSE	ukb-b-11590	0.000434384	461880	0.26	1.07577e-06	0.333431	1331	Intestine_age_gap	TRUE	0.0175841	2.69908e-06	TRUE	1.63305e-06
rs2876456	20	17406244	T	G	T	G	1.177	0.000132843	0.3129	0.309179	FALSE	FALSE	FALSE	ukb-b-11590	0.000337982	461880	0.69	4.74949e-06	0.257237	1331	Intestine_age_gap	TRUE	0.0155087	3.34474e-07	TRUE	5.77883e-06
rs34820653	6	96030921	G	T	G	T	1.84869	0.000218369	0.0879	0.083214	FALSE	FALSE	FALSE	ukb-b-11590	0.000563033	461880	0.7	8.8599e-06	0.416064	1331	Intestine_age_gap	TRUE	0.0146379	3.25677e-07	TRUE	1.0649e-05
rs34907579	19	16428053	A	G	A	G	1.47606	0.000123634	0.2787	0.281894	FALSE	FALSE	FALSE	ukb-b-11590	0.000346685	461880	0.719999	6.08016e-08	0.272515	1331	Intestine_age_gap	TRUE	0.0215982	2.75346e-07	TRUE	7.96893e-08
rs6761377	2	230571420	C	A	C	A	1.10128	-0.000127577	0.4346	0.411113	FALSE	FALSE	FALSE	ukb-b-11590	0.000320065	461880	0.69	5.62658e-06	0.242574	1331	Intestine_age_gap	TRUE	0.015272	3.43986e-07	TRUE	6.835e-06
rs680321	18	29797958	C	T	C	T	-3.0156	-0.000469846	0.4722	0.456508	FALSE	FALSE	FALSE	ukb-b-11590	0.000312716	461880	0.13	2.01562e-41	0.474051	1331	Intestine_age_gap	TRUE	0.0295492	4.88744e-06	TRUE	4.44374e-10
rs72713577	9	28521742	C	T	C	T	-1.82321	-4.98799e-05	0.1138	0.149792	FALSE	FALSE	FALSE	ukb-b-11590	0.000442401	461880	0.91	4.4862e-06	0.397431	1331	Intestine_age_gap	TRUE	0.0155884	2.75227e-08	TRUE	5.08762e-06
rs7291273	22	45212829	A	C	A	C	-2.41758	0.000165348	0.0556	0.0512	FALSE	FALSE	FALSE	ukb-b-11590	0.000731436	461880	0.82	4.84997e-06	0.528875	1331	Intestine_age_gap	TRUE	0.0154794	1.10641e-07	TRUE	5.65424e-06
rs73184769	3	175061183	G	A	G	A	2.17169	0.000782256	0.1044	0.104426	FALSE	FALSE	FALSE	ukb-b-11590	0.00051601	461880	0.13	1.32098e-07	0.411624	1331	Intestine_age_gap	TRUE	0.0205148	4.97568e-06	TRUE	2.37911e-07
rs7779453	7	19241659	T	C	T	C	-1.17124	-0.000578593	0.4733	0.462274	FALSE	FALSE	FALSE	ukb-b-11590	0.000313012	461880	0.0649995	1.91081e-06	0.245924	1331	Intestine_age_gap	TRUE	0.0167811	7.39765e-06	TRUE	3.45691e-06
rs9959124	18	71065525	T	G	T	G	-1.0949	-0.000355306	0.3937	0.385238	FALSE	FALSE	FALSE	ukb-b-11590	0.000322424	461880	0.27	9.59705e-06	0.247375	1331	Intestine_age_gap	TRUE	0.0145263	2.62919e-06	TRUE	1.37223e-05
rs10067080	5	157947408	T	C	T	C	1.24591	0.000311686	0.2757	0.279272	FALSE	FALSE	FALSE	ukb-b-13806	0.000184836	462933	0.0920005	2.89818e-06	0.26634	1331	Intestine_age_gap	TRUE	0.0161989	6.14246e-06	TRUE	4.95828e-06
rs11586128	1	14950102	T	C	T	C	1.2783	0.000250569	0.24	0.264097	FALSE	FALSE	FALSE	ukb-b-13806	0.000189127	462933	0.19	4.8758e-06	0.279711	1331	Intestine_age_gap	TRUE	0.015472	3.79166e-06	TRUE	7.49652e-06
rs12093040	1	222637341	A	G	A	G	1.1342	-0.000141667	0.3576	0.362033	FALSE	FALSE	FALSE	ukb-b-13806	0.000172853	462933	0.41	9.06501e-06	0.255545	1331	Intestine_age_gap	TRUE	0.0146059	1.451e-06	TRUE	1.21085e-05
rs2045100	4	69533702	A	T	A	T	1.62623	0.000436194	0.1521	0.158362	FALSE	TRUE	FALSE	ukb-b-13806	0.000231756	462933	0.0599998	1.07577e-06	0.333431	1331	Intestine_age_gap	TRUE	0.0175841	7.65205e-06	TRUE	2.00061e-06
rs2876456	20	17406244	T	G	T	G	1.177	-0.000190705	0.3129	0.309171	FALSE	FALSE	FALSE	ukb-b-13806	0.000180314	462933	0.29	4.74949e-06	0.257237	1331	Intestine_age_gap	TRUE	0.0155087	2.41628e-06	TRUE	6.83321e-06
rs34907579	19	16428053	A	G	A	G	1.47606	-0.000257549	0.2787	0.281868	FALSE	FALSE	FALSE	ukb-b-13806	0.000184981	462933	0.16	6.08016e-08	0.272515	1331	Intestine_age_gap	TRUE	0.0215982	4.18743e-06	TRUE	1.08144e-07
rs6761377	2	230571420	C	A	C	A	1.10128	9.67293e-05	0.4346	0.411122	FALSE	FALSE	FALSE	ukb-b-13806	0.000170771	462933	0.57	5.62658e-06	0.242574	1331	Intestine_age_gap	TRUE	0.015272	6.93061e-07	TRUE	7.12814e-06
rs680321	18	29797958	C	T	C	T	-3.0156	-5.69089e-05	0.4722	0.456498	FALSE	FALSE	FALSE	ukb-b-13806	0.000166837	462933	0.73	2.01562e-41	0.474051	1331	Intestine_age_gap	TRUE	0.0295492	2.51339e-07	TRUE	2.98007e-10
rs72713577	9	28521742	C	T	C	T	-1.82321	-2.80595e-05	0.1138	0.149782	FALSE	FALSE	FALSE	ukb-b-13806	0.000236056	462933	0.91	4.4862e-06	0.397431	1331	Intestine_age_gap	TRUE	0.0155884	3.0522e-08	TRUE	5.09503e-06
rs7779453	7	19241659	T	C	T	C	-1.17124	-8.49414e-05	0.4733	0.462258	FALSE	FALSE	FALSE	ukb-b-13806	0.000167015	462933	0.61	1.91081e-06	0.245924	1331	Intestine_age_gap	TRUE	0.0167811	5.58742e-07	TRUE	2.43608e-06
rs9959124	18	71065525	T	G	T	G	-1.0949	4.46716e-05	0.3937	0.385251	FALSE	FALSE	FALSE	ukb-b-13806	0.000172014	462933	0.8	9.59705e-06	0.247375	1331	Intestine_age_gap	TRUE	0.0145263	1.45686e-07	TRUE	1.11597e-05
rs10067080	5	157947408	T	C	T	C	1.24591	-0.000319916	0.2757	0.279272	FALSE	FALSE	FALSE	ukb-b-15829	0.000344465	462933	0.35	2.89818e-06	0.26634	1331	Intestine_age_gap	TRUE	0.0161989	1.86322e-06	TRUE	4.08399e-06
rs112971931	3	187269749	A	G	A	G	2.66801	8.59578e-06	0.04884	0.043388	FALSE	FALSE	FALSE	ukb-b-15829	0.000759379	462933	0.99	3.36e-06	0.574076	1331	Intestine_age_gap	TRUE	0.0159923	2.76782e-10	TRUE	3.72776e-06
rs11586128	1	14950102	T	C	T	C	1.2783	-2.04333e-05	0.24	0.264097	FALSE	FALSE	FALSE	ukb-b-15829	0.000352434	462933	0.95	4.8758e-06	0.279711	1331	Intestine_age_gap	TRUE	0.015472	7.26115e-09	TRUE	5.44577e-06
rs12093040	1	222637341	A	G	A	G	1.1342	0.000917632	0.3576	0.362033	FALSE	FALSE	FALSE	ukb-b-15829	0.000322107	462933	0.00439997	9.06501e-06	0.255545	1331	Intestine_age_gap	TRUE	0.0146059	1.75313e-05	TRUE	1.98035e-05
rs1636440	7	101331242	T	C	T	C	-2.25024	-0.000395359	0.06236	0.059198	FALSE	FALSE	FALSE	ukb-b-15829	0.000660759	462933	0.55	6.82171e-06	0.500145	1331	Intestine_age_gap	TRUE	0.0150029	7.73358e-07	TRUE	8.67858e-06
rs2045100	4	69533702	A	T	A	T	1.62623	0.000511536	0.1521	0.158362	FALSE	TRUE	FALSE	ukb-b-15829	0.000431887	462933	0.24	1.07577e-06	0.333431	1331	Intestine_age_gap	TRUE	0.0175841	3.03036e-06	TRUE	1.66219e-06
rs2876456	20	17406244	T	G	T	G	1.177	0.000100519	0.3129	0.309171	FALSE	FALSE	FALSE	ukb-b-15829	0.000336038	462933	0.760001	4.74949e-06	0.257237	1331	Intestine_age_gap	TRUE	0.0155087	1.93287e-07	TRUE	5.64184e-06
rs34820653	6	96030921	G	T	G	T	1.84869	0.000294295	0.0879	0.083222	FALSE	FALSE	FALSE	ukb-b-15829	0.000559777	462933	0.6	8.8599e-06	0.416064	1331	Intestine_age_gap	TRUE	0.0146379	5.97062e-07	TRUE	1.10152e-05
rs34907579	19	16428053	A	G	A	G	1.47606	0.000117808	0.2787	0.281868	FALSE	FALSE	FALSE	ukb-b-15829	0.000344718	462933	0.73	6.08016e-08	0.272515	1331	Intestine_age_gap	TRUE	0.0215982	2.52293e-07	TRUE	7.93216e-08
rs6761377	2	230571420	C	A	C	A	1.10128	-7.04014e-05	0.4346	0.411122	FALSE	FALSE	FALSE	ukb-b-15829	0.000318225	462933	0.82	5.62658e-06	0.242574	1331	Intestine_age_gap	TRUE	0.015272	1.05725e-07	TRUE	6.53528e-06
rs680321	18	29797958	C	T	C	T	-3.0156	-0.000519744	0.4722	0.456498	FALSE	FALSE	FALSE	ukb-b-15829	0.00031092	462933	0.0949992	2.01562e-41	0.474051	1331	Intestine_age_gap	TRUE	0.0295492	6.03619e-06	TRUE	4.70469e-10
rs72713577	9	28521742	C	T	C	T	-1.82321	-5.01148e-06	0.1138	0.149782	FALSE	FALSE	FALSE	ukb-b-15829	0.000439892	462933	0.99	4.4862e-06	0.397431	1331	Intestine_age_gap	TRUE	0.0155884	2.80365e-10	TRUE	4.95735e-06
rs7291273	22	45212829	A	C	A	C	-2.41758	0.000363522	0.0556	0.051194	FALSE	FALSE	FALSE	ukb-b-15829	0.000727232	462933	0.62	4.84997e-06	0.528875	1331	Intestine_age_gap	TRUE	0.0154794	5.39758e-07	TRUE	6.05938e-06
rs73184769	3	175061183	G	A	G	A	2.17169	0.000823552	0.1044	0.104403	FALSE	FALSE	FALSE	ukb-b-15829	0.00051312	462933	0.11	1.32098e-07	0.411624	1331	Intestine_age_gap	TRUE	0.0205148	5.56449e-06	TRUE	2.43902e-07
rs7779453	7	19241659	T	C	T	C	-1.17124	-0.000536644	0.4733	0.462258	FALSE	FALSE	FALSE	ukb-b-15829	0.000311239	462933	0.0850002	1.91081e-06	0.245924	1331	Intestine_age_gap	TRUE	0.0167811	6.42193e-06	TRUE	3.34534e-06
rs9959124	18	71065525	T	G	T	G	-1.0949	-0.0004117	0.3937	0.385251	FALSE	FALSE	FALSE	ukb-b-15829	0.000320567	462933	0.2	9.59705e-06	0.247375	1331	Intestine_age_gap	TRUE	0.0145263	3.56292e-06	TRUE	1.434e-05
rs10067080	5	157947408	T	C	T	C	1.24591	-0.000152537	0.2757	0.279269	FALSE	FALSE	FALSE	ukb-b-4929	0.000129525	463010	0.24	2.89818e-06	0.26634	1331	Intestine_age_gap	TRUE	0.0161989	2.99539e-06	TRUE	4.35342e-06
rs11586128	1	14950102	T	C	T	C	1.2783	-3.77418e-05	0.24	0.264103	FALSE	FALSE	FALSE	ukb-b-4929	0.000132535	463010	0.780001	4.8758e-06	0.279711	1331	Intestine_age_gap	TRUE	0.015472	1.75144e-07	TRUE	5.76823e-06
rs12093040	1	222637341	A	G	A	G	1.1342	0.000198827	0.3576	0.362038	FALSE	FALSE	FALSE	ukb-b-4929	0.000121129	463010	0.1	9.06501e-06	0.255545	1331	Intestine_age_gap	TRUE	0.0146059	5.8192e-06	TRUE	1.47977e-05
rs2876456	20	17406244	T	G	T	G	1.177	-7.07085e-05	0.3129	0.309172	FALSE	FALSE	FALSE	ukb-b-4929	0.000126356	463010	0.58	4.74949e-06	0.257237	1331	Intestine_age_gap	TRUE	0.0155087	6.76336e-07	TRUE	6.02647e-06
rs34907579	19	16428053	A	G	A	G	1.47606	2.17914e-05	0.2787	0.281879	FALSE	FALSE	FALSE	ukb-b-4929	0.000129623	463010	0.87	6.08016e-08	0.272515	1331	Intestine_age_gap	TRUE	0.0215982	6.10404e-08	TRUE	7.53372e-08
rs6761377	2	230571420	C	A	C	A	1.10128	-0.000165612	0.4346	0.411114	FALSE	FALSE	FALSE	ukb-b-4929	0.00011967	463010	0.17	5.62658e-06	0.242574	1331	Intestine_age_gap	TRUE	0.015272	4.1364e-06	TRUE	8.74386e-06
rs680321	18	29797958	C	T	C	T	-3.0156	-3.72271e-05	0.4722	0.456493	FALSE	FALSE	FALSE	ukb-b-4929	0.000116911	463010	0.75	2.01562e-41	0.474051	1331	Intestine_age_gap	TRUE	0.0295492	2.18987e-07	TRUE	2.95678e-10
rs7779453	7	19241659	T	C	T	C	-1.17124	-5.52687e-05	0.4733	0.462262	FALSE	FALSE	FALSE	ukb-b-4929	0.000117039	463010	0.64	1.91081e-06	0.245924	1331	Intestine_age_gap	TRUE	0.0167811	4.81625e-07	TRUE	2.41289e-06
rs9959124	18	71065525	T	G	T	G	-1.0949	0.000207956	0.3937	0.385248	FALSE	FALSE	FALSE	ukb-b-4929	0.000120539	463010	0.0840001	9.59705e-06	0.247375	1331	Intestine_age_gap	TRUE	0.0145263	6.4283e-06	TRUE	1.59591e-05
rs10067080	5	157947408	T	C	T	C	1.24591	-0.000642736	0.2757	0.279272	FALSE	FALSE	FALSE	ukb-b-6358	0.000264178	462933	0.015	2.89818e-06	0.26634	1331	Intestine_age_gap	TRUE	0.0161989	1.27865e-05	TRUE	5.99373e-06
rs11586128	1	14950102	T	C	T	C	1.2783	0.000207777	0.24	0.264097	FALSE	FALSE	FALSE	ukb-b-6358	0.000270314	462933	0.44	4.8758e-06	0.279711	1331	Intestine_age_gap	TRUE	0.015472	1.27627e-06	TRUE	6.51863e-06
rs12093040	1	222637341	A	G	A	G	1.1342	0.000552217	0.3576	0.362033	FALSE	FALSE	FALSE	ukb-b-6358	0.000247054	462933	0.025	9.06501e-06	0.255545	1331	Intestine_age_gap	TRUE	0.0146059	1.07923e-05	TRUE	1.70865e-05
rs1636440	7	101331242	T	C	T	C	-2.25024	0.000917274	0.06236	0.059198	FALSE	FALSE	FALSE	ukb-b-6358	0.000506772	462933	0.0700003	6.82171e-06	0.500145	1331	Intestine_age_gap	TRUE	0.0150029	7.07707e-06	TRUE	1.17101e-05
rs2045100	4	69533702	A	T	A	T	1.62623	-0.00060228	0.1521	0.158362	FALSE	TRUE	FALSE	ukb-b-6358	0.000331236	462933	0.0690001	1.07577e-06	0.333431	1331	Intestine_age_gap	TRUE	0.0175841	7.14171e-06	TRUE	1.96708e-06
rs2876456	20	17406244	T	G	T	G	1.177	0.000269984	0.3129	0.309171	FALSE	FALSE	FALSE	ukb-b-6358	0.000257713	462933	0.29	4.74949e-06	0.257237	1331	Intestine_age_gap	TRUE	0.0155087	2.37075e-06	TRUE	6.81602e-06
rs34820653	6	96030921	G	T	G	T	1.84869	0.000249003	0.0879	0.083222	FALSE	FALSE	FALSE	ukb-b-6358	0.000429378	462933	0.56	8.8599e-06	0.416064	1331	Intestine_age_gap	TRUE	0.0146379	7.26462e-07	TRUE	1.11631e-05
rs34907579	19	16428053	A	G	A	G	1.47606	-0.00021253	0.2787	0.281868	FALSE	FALSE	FALSE	ukb-b-6358	0.000264382	462933	0.42	6.08016e-08	0.272515	1331	Intestine_age_gap	TRUE	0.0215982	1.39592e-06	TRUE	9.09431e-08
rs6761377	2	230571420	C	A	C	A	1.10128	0.000288384	0.4346	0.411122	FALSE	FALSE	FALSE	ukb-b-6358	0.000244078	462933	0.24	5.62658e-06	0.242574	1331	Intestine_age_gap	TRUE	0.015272	3.01556e-06	TRUE	8.31424e-06
rs680321	18	29797958	C	T	C	T	-3.0156	-0.000453994	0.4722	0.456498	FALSE	FALSE	FALSE	ukb-b-6358	0.000238451	462933	0.0569994	2.01562e-41	0.474051	1331	Intestine_age_gap	TRUE	0.0295492	7.83037e-06	TRUE	5.09252e-10
rs72713577	9	28521742	C	T	C	T	-1.82321	0.000447373	0.1138	0.149782	FALSE	FALSE	FALSE	ukb-b-6358	0.000337384	462933	0.18	4.4862e-06	0.397431	1331	Intestine_age_gap	TRUE	0.0155884	3.79815e-06	TRUE	6.91544e-06
rs7291273	22	45213867	A	C	A	C	-2.41758	0.000328033	0.0556	0.070196	FALSE	FALSE	FALSE	ukb-b-6358	0.000478451	462933	0.49	4.84997e-06	0.528875	1331	Intestine_age_gap	TRUE	0.0154794	1.01541e-06	TRUE	6.35045e-06
rs73184769	3	175061183	G	A	G	A	2.17169	0.000187417	0.1044	0.104403	FALSE	FALSE	FALSE	ukb-b-6358	0.000393538	462933	0.630001	1.32098e-07	0.411624	1331	Intestine_age_gap	TRUE	0.0205148	4.89923e-07	TRUE	1.76339e-07
rs7779453	7	19241659	T	C	T	C	-1.17124	0.000147602	0.4733	0.462258	FALSE	FALSE	FALSE	ukb-b-6358	0.000238706	462933	0.54	1.91081e-06	0.245924	1331	Intestine_age_gap	TRUE	0.0167811	8.25926e-07	TRUE	2.50727e-06
rs9959124	18	71065525	T	G	T	G	-1.0949	0.000429013	0.3937	0.385251	FALSE	FALSE	FALSE	ukb-b-6358	0.00024585	462933	0.0810009	9.59705e-06	0.247375	1331	Intestine_age_gap	TRUE	0.0145263	6.57781e-06	TRUE	1.60364e-05
rs10067080	5	157947408	T	C	T	C	1.24591	-0.000582962	0.2757	0.279301	FALSE	FALSE	FALSE	ukb-b-8714	0.000284052	461880	0.04	2.89818e-06	0.26634	1331	Intestine_age_gap	TRUE	0.0161989	9.11913e-06	TRUE	5.44601e-06
rs11586128	1	14950102	T	C	T	C	1.2783	0.000459574	0.24	0.264126	FALSE	FALSE	FALSE	ukb-b-8714	0.000290655	461880	0.11	4.8758e-06	0.279711	1331	Intestine_age_gap	TRUE	0.015472	5.41285e-06	TRUE	7.99707e-06
rs12093040	1	222637341	A	G	A	G	1.1342	0.000423611	0.3576	0.362124	FALSE	FALSE	FALSE	ukb-b-8714	0.000265647	461880	0.11	9.06501e-06	0.255545	1331	Intestine_age_gap	TRUE	0.0146059	5.50548e-06	TRUE	1.46383e-05
rs1636440	7	101331242	T	C	T	C	-2.25024	0.00124582	0.06236	0.059193	FALSE	FALSE	FALSE	ukb-b-8714	0.000544984	461880	0.0219999	6.82171e-06	0.500145	1331	Intestine_age_gap	TRUE	0.0150029	1.13139e-05	TRUE	1.31672e-05
rs2045100	4	69533702	A	T	A	T	1.62623	-0.000487158	0.1521	0.158372	FALSE	TRUE	FALSE	ukb-b-8714	0.000356181	461880	0.17	1.07577e-06	0.333431	1331	Intestine_age_gap	TRUE	0.0175841	4.05013e-06	TRUE	1.7462e-06
rs2876456	20	17406244	T	G	T	G	1.177	0.000246627	0.3129	0.309179	FALSE	FALSE	FALSE	ukb-b-8714	0.000277123	461880	0.37	4.74949e-06	0.257237	1331	Intestine_age_gap	TRUE	0.0155087	1.71478e-06	TRUE	6.55288e-06
rs34820653	6	96030921	G	T	G	T	1.84869	7.53557e-05	0.0879	0.083214	FALSE	FALSE	FALSE	ukb-b-8714	0.000461721	461880	0.87	8.8599e-06	0.416064	1331	Intestine_age_gap	TRUE	0.0146379	5.76694e-08	TRUE	1.00737e-05
rs34907579	19	16428053	A	G	A	G	1.47606	-0.000305856	0.2787	0.281894	FALSE	FALSE	FALSE	ukb-b-8714	0.00028427	461880	0.28	6.08016e-08	0.272515	1331	Intestine_age_gap	TRUE	0.0215982	2.50636e-06	TRUE	9.85836e-08
rs6761377	2	230571420	C	A	C	A	1.10128	0.000142724	0.4346	0.411113	FALSE	FALSE	FALSE	ukb-b-8714	0.000262454	461880	0.59	5.62658e-06	0.242574	1331	Intestine_age_gap	TRUE	0.015272	6.40265e-07	TRUE	7.08936e-06
rs680321	18	29797958	C	T	C	T	-3.0156	-0.000426739	0.4722	0.456508	FALSE	FALSE	FALSE	ukb-b-8714	0.000256409	461880	0.0959997	2.01562e-41	0.474051	1331	Intestine_age_gap	TRUE	0.0295492	5.99692e-06	TRUE	4.69657e-10
rs72713577	9	28521742	C	T	C	T	-1.82321	0.000349974	0.1138	0.149792	FALSE	FALSE	FALSE	ukb-b-8714	0.000362763	461880	0.33	4.4862e-06	0.397431	1331	Intestine_age_gap	TRUE	0.0155884	2.0151e-06	TRUE	6.31608e-06
rs7291273	22	45212829	A	C	A	C	-2.41758	0.000142413	0.0556	0.0512	FALSE	FALSE	FALSE	ukb-b-8714	0.000599723	461880	0.81	4.84997e-06	0.528875	1331	Intestine_age_gap	TRUE	0.0154794	1.22087e-07	TRUE	5.67063e-06
rs73184769	3	175061183	G	A	G	A	2.17169	0.000256633	0.1044	0.104426	FALSE	FALSE	FALSE	ukb-b-8714	0.000423112	461880	0.54	1.32098e-07	0.411624	1331	Intestine_age_gap	TRUE	0.0205148	7.96502e-07	TRUE	1.83153e-07
rs7779453	7	19241659	T	C	T	C	-1.17124	8.19831e-05	0.4733	0.462274	FALSE	FALSE	FALSE	ukb-b-8714	0.000256662	461880	0.75	1.91081e-06	0.245924	1331	Intestine_age_gap	TRUE	0.0167811	2.20901e-07	TRUE	2.31832e-06
rs9959124	18	71065525	T	G	T	G	-1.0949	0.000287751	0.3937	0.385238	FALSE	FALSE	FALSE	ukb-b-8714	0.000264368	461880	0.28	9.59705e-06	0.247375	1331	Intestine_age_gap	TRUE	0.0145263	2.565e-06	TRUE	1.3677e-05
rs10067080	5	157947408	T	C	T	C	1.24591	-0.000673442	0.2757	0.281509	FALSE	FALSE	FALSE	ukb-d-I9_CHD	0.000427839	361194	0.115476	2.89818e-06	0.26634	1331	Intestine_age_gap	TRUE	0.0161989	6.8596e-06	TRUE	5.12538e-06
rs112971931	3	187269749	A	G	A	G	2.66801	-0.00104342	0.04884	0.0433244	FALSE	FALSE	FALSE	ukb-d-I9_CHD	0.000945571	361194	0.269817	3.36e-06	0.574076	1331	Intestine_age_gap	TRUE	0.0159923	3.37125e-06	TRUE	5.16515e-06
rs11586128	1	14950102	T	C	T	C	1.2783	-0.000501065	0.24	0.26466	FALSE	FALSE	FALSE	ukb-d-I9_CHD	0.000438661	361194	0.253346	4.8758e-06	0.279711	1331	Intestine_age_gap	TRUE	0.015472	3.61235e-06	TRUE	7.50032e-06
rs12093040	1	222637341	A	G	A	G	1.1342	0.000786869	0.3576	0.36445	FALSE	FALSE	FALSE	ukb-d-I9_CHD	0.000400782	361194	0.0496078	9.06501e-06	0.255545	1331	Intestine_age_gap	TRUE	0.0146059	1.0672e-05	TRUE	1.71686e-05
rs151000551	X	80167991	T	A	T	A	-1.44371	-0.000328641	0.08333	0.0707841	FALSE	TRUE	FALSE	ukb-d-I9_CHD	0.000629824	361194	0.601811	3.80952e-06	0.312389	1331	Intestine_age_gap	TRUE	0.0158168	7.53818e-07	TRUE	4.93671e-06
rs1636440	7	101331242	T	C	T	C	-2.25024	-0.000275038	0.06236	0.058713	FALSE	FALSE	FALSE	ukb-d-I9_CHD	0.000825577	361194	0.739025	6.82171e-06	0.500145	1331	Intestine_age_gap	TRUE	0.0150029	3.07278e-07	TRUE	8.28221e-06
rs2045100	4	69533702	A	T	A	T	1.62623	8.96499e-05	0.1521	0.15718	FALSE	TRUE	FALSE	ukb-d-I9_CHD	0.00053942	361194	0.868002	1.07577e-06	0.333431	1331	Intestine_age_gap	TRUE	0.0175841	7.64729e-08	TRUE	1.28531e-06
rs2876456	20	17406244	T	G	T	G	1.177	0.000351757	0.3129	0.309342	FALSE	FALSE	FALSE	ukb-d-I9_CHD	0.000418359	361194	0.400459	4.74949e-06	0.257237	1331	Intestine_age_gap	TRUE	0.0155087	1.95726e-06	TRUE	6.7108e-06
rs34820653	6	96030921	G	T	G	T	1.84869	0.000211096	0.0879	0.0834879	FALSE	FALSE	FALSE	ukb-d-I9_CHD	0.000695775	361194	0.761588	8.8599e-06	0.416064	1331	Intestine_age_gap	TRUE	0.0146379	2.5485e-07	TRUE	1.06177e-05
rs34907579	19	16428053	A	G	A	G	1.47606	-0.000459398	0.2787	0.279585	FALSE	FALSE	FALSE	ukb-d-I9_CHD	0.000430362	361194	0.285761	6.08016e-08	0.272515	1331	Intestine_age_gap	TRUE	0.0215982	3.15479e-06	TRUE	1.03673e-07
rs6622298	X	107463272	T	A	T	A	0.857687	0.000387495	0.3272	0.342579	FALSE	TRUE	FALSE	ukb-d-I9_CHD	0.000337889	361194	0.25146	5.85855e-06	0.189275	1331	Intestine_age_gap	TRUE	0.0152155	3.6412e-06	TRUE	8.97717e-06
rs6761377	2	230571420	C	A	C	A	1.10128	9.36477e-05	0.4346	0.411186	FALSE	FALSE	FALSE	ukb-d-I9_CHD	0.000396233	361194	0.813165	5.62658e-06	0.242574	1331	Intestine_age_gap	TRUE	0.015272	1.54652e-07	TRUE	6.66876e-06
rs680321	18	29797958	C	T	C	T	-3.0156	-0.000683397	0.4722	0.455741	FALSE	FALSE	FALSE	ukb-d-I9_CHD	0.000386937	361194	0.0773678	2.01562e-41	0.474051	1331	Intestine_age_gap	TRUE	0.0295492	8.63622e-06	TRUE	5.34538e-10
rs72713577	9	28521742	C	T	C	T	-1.82321	-0.00043711	0.1138	0.149274	FALSE	FALSE	FALSE	ukb-d-I9_CHD	0.000547563	361194	0.424706	4.4862e-06	0.397431	1331	Intestine_age_gap	TRUE	0.0155884	1.76431e-06	TRUE	6.27103e-06
rs7291273	22	45212829	A	C	A	C	-2.41758	-0.000739697	0.0556	0.0497954	FALSE	FALSE	FALSE	ukb-d-I9_CHD	0.000915912	361194	0.419318	4.84997e-06	0.528875	1331	Intestine_age_gap	TRUE	0.0154794	1.80577e-06	TRUE	6.78483e-06
rs73184769	3	175061183	G	A	G	A	2.17169	0.000880353	0.1044	0.105488	FALSE	FALSE	FALSE	ukb-d-I9_CHD	0.000636096	361194	0.166361	1.32098e-07	0.411624	1331	Intestine_age_gap	TRUE	0.0205148	5.30308e-06	TRUE	2.43952e-07
rs7779453	7	19241659	T	C	T	C	-1.17124	0.000104674	0.4733	0.463173	FALSE	FALSE	FALSE	ukb-d-I9_CHD	0.000387606	361194	0.78712	1.91081e-06	0.245924	1331	Intestine_age_gap	TRUE	0.0167811	2.0191e-07	TRUE	2.33129e-06
rs9959124	18	71065525	T	G	T	G	-1.0949	-0.000406857	0.3937	0.385921	FALSE	FALSE	FALSE	ukb-d-I9_CHD	0.000398903	361194	0.307758	9.59705e-06	0.247375	1331	Intestine_age_gap	TRUE	0.0145263	2.88011e-06	TRUE	1.40057e-05
rs10067080	5	157947408	T	C	T	C	1.24591	-0.000186505	0.2757	0.281509	FALSE	FALSE	FALSE	ukb-d-I9_MI_STRICT	0.000358091	361194	0.602485	2.89818e-06	0.26634	1331	Intestine_age_gap	TRUE	0.0161989	7.51027e-07	TRUE	3.77619e-06
rs112971931	3	187269749	A	G	A	G	2.66801	-0.00116751	0.04884	0.0433244	FALSE	FALSE	FALSE	ukb-d-I9_MI_STRICT	0.000791418	361194	0.140157	3.36e-06	0.574076	1331	Intestine_age_gap	TRUE	0.0159923	6.02516e-06	TRUE	5.74763e-06
rs11586128	1	14950102	T	C	T	C	1.2783	-0.000424042	0.24	0.26466	FALSE	FALSE	FALSE	ukb-d-I9_MI_STRICT	0.000367148	361194	0.248107	4.8758e-06	0.279711	1331	Intestine_age_gap	TRUE	0.015472	3.69314e-06	TRUE	7.52737e-06
rs12093040	1	222637341	A	G	A	G	1.1342	0.000463711	0.3576	0.36445	FALSE	FALSE	FALSE	ukb-d-I9_MI_STRICT	0.000335446	361194	0.166858	9.06501e-06	0.255545	1331	Intestine_age_gap	TRUE	0.0146059	5.29065e-06	TRUE	1.46416e-05
rs151000551	X	80167991	T	A	T	A	-1.44371	-0.000277797	0.08333	0.0707841	FALSE	TRUE	FALSE	ukb-d-I9_MI_STRICT	0.000527147	361194	0.598206	3.80952e-06	0.312389	1331	Intestine_age_gap	TRUE	0.0158168	7.6887e-07	TRUE	4.9441e-06
rs1636440	7	101331242	T	C	T	C	-2.25024	-0.000288545	0.06236	0.058713	FALSE	FALSE	FALSE	ukb-d-I9_MI_STRICT	0.000690987	361194	0.676253	6.82171e-06	0.500145	1331	Intestine_age_gap	TRUE	0.0150029	4.8278e-07	TRUE	8.48188e-06
rs2045100	4	69533702	A	T	A	T	1.62623	-3.20821e-05	0.1521	0.15718	FALSE	TRUE	FALSE	ukb-d-I9_MI_STRICT	0.000451481	361194	0.94335	1.07577e-06	0.333431	1331	Intestine_age_gap	TRUE	0.0175841	1.398e-08	TRUE	1.24857e-06
rs2876456	20	17406244	T	G	T	G	1.177	5.20042e-05	0.3129	0.309342	FALSE	FALSE	FALSE	ukb-d-I9_MI_STRICT	0.000350156	361194	0.881935	4.74949e-06	0.257237	1331	Intestine_age_gap	TRUE	0.0155087	6.10683e-08	TRUE	5.50498e-06
rs34820653	6	96030921	G	T	G	T	1.84869	0.000639295	0.0879	0.0834879	FALSE	FALSE	FALSE	ukb-d-I9_MI_STRICT	0.000582345	361194	0.272295	8.8599e-06	0.416064	1331	Intestine_age_gap	TRUE	0.0146379	3.33659e-06	TRUE	1.32392e-05
rs34907579	19	16428053	A	G	A	G	1.47606	-0.000324093	0.2787	0.279585	FALSE	FALSE	FALSE	ukb-d-I9_MI_STRICT	0.000360202	361194	0.368252	6.08016e-08	0.272515	1331	Intestine_age_gap	TRUE	0.0215982	2.24134e-06	TRUE	9.80416e-08
rs6622298	X	107463272	T	A	T	A	0.857687	9.91683e-05	0.3272	0.342579	FALSE	TRUE	FALSE	ukb-d-I9_MI_STRICT	0.000282805	361194	0.725844	5.85855e-06	0.189275	1331	Intestine_age_gap	TRUE	0.0152155	3.40434e-07	TRUE	7.1681e-06
rs6761377	2	230571420	C	A	C	A	1.10128	-9.89635e-05	0.4346	0.411186	FALSE	FALSE	FALSE	ukb-d-I9_MI_STRICT	0.000331637	361194	0.76539	5.62658e-06	0.242574	1331	Intestine_age_gap	TRUE	0.015272	2.46539e-07	TRUE	6.7877e-06
rs680321	18	29797958	C	T	C	T	-3.0156	-0.000779045	0.4722	0.455741	FALSE	FALSE	FALSE	ukb-d-I9_MI_STRICT	0.000323855	361194	0.0161492	2.01562e-41	0.474051	1331	Intestine_age_gap	TRUE	0.0295492	1.60206e-05	TRUE	6.83257e-10
rs72713577	9	28521742	C	T	C	T	-1.82321	-0.000296738	0.1138	0.149274	FALSE	FALSE	FALSE	ukb-d-I9_MI_STRICT	0.000458296	361194	0.517321	4.4862e-06	0.397431	1331	Intestine_age_gap	TRUE	0.0155884	1.16069e-06	TRUE	6.00633e-06
rs7291273	22	45212829	A	C	A	C	-2.41758	-0.000451545	0.0556	0.0497954	FALSE	FALSE	FALSE	ukb-d-I9_MI_STRICT	0.000766596	361194	0.555844	4.84997e-06	0.528875	1331	Intestine_age_gap	TRUE	0.0154794	9.60573e-07	TRUE	6.37488e-06
rs73184769	3	175061183	G	A	G	A	2.17169	0.0006665	0.1044	0.105488	FALSE	FALSE	FALSE	ukb-d-I9_MI_STRICT	0.000532397	361194	0.210613	1.32098e-07	0.411624	1331	Intestine_age_gap	TRUE	0.0205148	4.33899e-06	TRUE	2.33741e-07
rs7779453	7	19241659	T	C	T	C	-1.17124	-3.03476e-06	0.4733	0.463173	FALSE	FALSE	FALSE	ukb-d-I9_MI_STRICT	0.000324417	361194	0.992536	1.91081e-06	0.245924	1331	Intestine_age_gap	TRUE	0.0167811	2.42272e-10	TRUE	2.15696e-06
rs9959124	18	71065525	T	G	T	G	-1.0949	-0.000112454	0.3937	0.385921	FALSE	FALSE	FALSE	ukb-d-I9_MI_STRICT	0.000333872	361194	0.736255	9.59705e-06	0.247375	1331	Intestine_age_gap	TRUE	0.0145263	3.14088e-07	TRUE	1.15923e-05
rs10067080	5	157947408	T	C	T	C	1.24591	-0.000418395	0.2757	0.281509	FALSE	FALSE	FALSE	ukb-d-I9_STR_EXH	0.000248639	361194	0.0924272	2.89818e-06	0.26634	1331	Intestine_age_gap	TRUE	0.0161989	7.83958e-06	TRUE	5.28835e-06
rs112971931	3	187269749	A	G	A	G	2.66801	-0.000133076	0.04884	0.0433244	FALSE	FALSE	FALSE	ukb-d-I9_STR_EXH	0.000549522	361194	0.808652	3.36e-06	0.574076	1331	Intestine_age_gap	TRUE	0.0159923	1.62365e-07	TRUE	4.02482e-06
rs11586128	1	14950102	T	C	T	C	1.2783	0.000162076	0.24	0.26466	FALSE	FALSE	FALSE	ukb-d-I9_STR_EXH	0.000254929	361194	0.524926	4.8758e-06	0.279711	1331	Intestine_age_gap	TRUE	0.015472	1.11908e-06	TRUE	6.49415e-06
rs12093040	1	222637341	A	G	A	G	1.1342	0.000474122	0.3576	0.36445	FALSE	FALSE	FALSE	ukb-d-I9_STR_EXH	0.000232916	361194	0.0417917	9.06501e-06	0.255545	1331	Intestine_age_gap	TRUE	0.0146059	1.1472e-05	TRUE	1.75106e-05
rs151000551	X	80167991	T	A	T	A	-1.44371	3.29587e-05	0.08333	0.0707841	FALSE	TRUE	FALSE	ukb-d-I9_STR_EXH	0.000366024	361194	0.928251	3.80952e-06	0.312389	1331	Intestine_age_gap	TRUE	0.0158168	2.24483e-08	TRUE	4.35682e-06
rs1636440	7	101331242	T	C	T	C	-2.25024	-0.000182105	0.06236	0.058713	FALSE	FALSE	FALSE	ukb-d-I9_STR_EXH	0.000479786	361194	0.704276	6.82171e-06	0.500145	1331	Intestine_age_gap	TRUE	0.0150029	3.98851e-07	TRUE	8.39139e-06
rs2045100	4	69533702	A	T	A	T	1.62623	0.000231909	0.1521	0.15718	FALSE	TRUE	FALSE	ukb-d-I9_STR_EXH	0.000313485	361194	0.459436	1.07577e-06	0.333431	1331	Intestine_age_gap	TRUE	0.0175841	1.51518e-06	TRUE	1.52986e-06
rs2876456	20	17406244	T	G	T	G	1.177	0.000248143	0.3129	0.309342	FALSE	FALSE	FALSE	ukb-d-I9_STR_EXH	0.00024313	361194	0.307435	4.74949e-06	0.257237	1331	Intestine_age_gap	TRUE	0.0155087	2.88395e-06	TRUE	7.06312e-06
rs34820653	6	96030921	G	T	G	T	1.84869	0.000252098	0.0879	0.0834879	FALSE	FALSE	FALSE	ukb-d-I9_STR_EXH	0.000404351	361194	0.532981	8.8599e-06	0.416064	1331	Intestine_age_gap	TRUE	0.0146379	1.07618e-06	TRUE	1.1608e-05
rs34907579	19	16428053	A	G	A	G	1.47606	0.000189289	0.2787	0.279585	FALSE	FALSE	FALSE	ukb-d-I9_STR_EXH	0.000250106	361194	0.449149	6.08016e-08	0.272515	1331	Intestine_age_gap	TRUE	0.0215982	1.58586e-06	TRUE	9.34777e-08
rs6622298	X	107463272	T	A	T	A	0.857687	-8.24205e-05	0.3272	0.342579	FALSE	TRUE	FALSE	ukb-d-I9_STR_EXH	0.000196365	361194	0.674683	5.85855e-06	0.189275	1331	Intestine_age_gap	TRUE	0.0152155	4.87758e-07	TRUE	7.31007e-06
rs6761377	2	230571420	C	A	C	A	1.10128	0.00013568	0.4346	0.411186	FALSE	FALSE	FALSE	ukb-d-I9_STR_EXH	0.000230272	361194	0.555717	5.62658e-06	0.242574	1331	Intestine_age_gap	TRUE	0.015272	9.61194e-07	TRUE	7.37259e-06
rs680321	18	29797958	C	T	C	T	-3.0156	-0.00012531	0.4722	0.455741	FALSE	FALSE	FALSE	ukb-d-I9_STR_EXH	0.00022487	361194	0.577354	2.01562e-41	0.474051	1331	Intestine_age_gap	TRUE	0.0295492	8.59746e-07	TRUE	3.3471e-10
rs72713577	9	28521742	C	T	C	T	-1.82321	0.000396787	0.1138	0.149274	FALSE	FALSE	FALSE	ukb-d-I9_STR_EXH	0.000318217	361194	0.212432	4.4862e-06	0.397431	1331	Intestine_age_gap	TRUE	0.0155884	4.30455e-06	TRUE	7.12612e-06
rs7291273	22	45212829	A	C	A	C	-2.41758	0.000378085	0.0556	0.0497954	FALSE	FALSE	FALSE	ukb-d-I9_STR_EXH	0.000532285	361194	0.477515	4.84997e-06	0.528875	1331	Intestine_age_gap	TRUE	0.0154794	1.39686e-06	TRUE	6.59932e-06
rs73184769	3	175061183	G	A	G	A	2.17169	-6.99703e-05	0.1044	0.105488	FALSE	FALSE	FALSE	ukb-d-I9_STR_EXH	0.00036967	361194	0.849875	1.32098e-07	0.411624	1331	Intestine_age_gap	TRUE	0.0205148	9.91884e-08	TRUE	1.65346e-07
rs7779453	7	19241659	T	C	T	C	-1.17124	-8.3118e-05	0.4733	0.463173	FALSE	FALSE	FALSE	ukb-d-I9_STR_EXH	0.000225258	361194	0.712136	1.91081e-06	0.245924	1331	Intestine_age_gap	TRUE	0.0167811	3.76957e-07	TRUE	2.40094e-06
rs9959124	18	71065525	T	G	T	G	-1.0949	0.000159652	0.3937	0.385921	FALSE	FALSE	FALSE	ukb-d-I9_STR_EXH	0.000231824	361194	0.491027	9.59705e-06	0.247375	1331	Intestine_age_gap	TRUE	0.0145263	1.31309e-06	TRUE	1.2781e-05
rs10490016	2	234875139	C	T	C	T	-2.81082	0.0119	0.05297	0.050149	FALSE	FALSE	FALSE	ebi-a-GCST003116	0.0225674	42457	0.597979	3.88386e-06	0.608733	1331	Brain_age_gap	TRUE	0.0157898	6.54936e-06	TRUE	8.94082e-06
rs16863620	3	188536690	A	G	A	G	-1.57222	0.009487	0.1882	0.23399	FALSE	FALSE	FALSE	ebi-a-GCST003116	0.011079	42457	0.391827	8.14224e-06	0.352405	1331	Brain_age_gap	TRUE	0.0147558	1.72711e-05	TRUE	2.32085e-05
rs17178441	6	29708466	T	C	T	C	-2.68141	0.011283	0.05334	0.048573	FALSE	FALSE	FALSE	ebi-a-GCST003116	0.0235049	42457	0.631207	8.57525e-06	0.602524	1331	Brain_age_gap	TRUE	0.0146835	5.42752e-06	TRUE	1.81736e-05
rs182456433	14	74307398	T	C	T	C	2.85993	-0.004991	0.05409	0.100435	FALSE	FALSE	FALSE	ebi-a-GCST003116	0.0152959	42457	0.744199	2.83971e-06	0.610825	1331	Brain_age_gap	TRUE	0.0162274	2.50781e-06	TRUE	5.64172e-06
rs1999999	1	240714262	T	G	T	G	-1.82443	-0.022866	0.1405	0.105541	FALSE	FALSE	FALSE	ebi-a-GCST003116	0.0171176	42457	0.181608	6.69697e-06	0.40515	1331	Brain_age_gap	TRUE	0.0150287	4.20289e-05	TRUE	2.80468e-05
rs35633	16	23704005	T	C	T	C	1.43766	0.003762	0.2213	0.226281	FALSE	FALSE	FALSE	ebi-a-GCST003116	0.0110659	42457	0.733885	9.87947e-06	0.325278	1331	Brain_age_gap	TRUE	0.0144858	2.72229e-06	TRUE	1.86211e-05
rs4365591	3	72021775	C	T	C	T	-2.15224	0.019568	0.08565	0.094708	FALSE	FALSE	FALSE	ebi-a-GCST003116	0.015411	42457	0.204177	9.22206e-06	0.485322	1331	Brain_age_gap	TRUE	0.0145819	3.7974e-05	TRUE	3.57428e-05
rs7110255	11	4784113	A	C	A	C	1.41416	0.008215	0.2412	0.242623	FALSE	FALSE	FALSE	ebi-a-GCST003116	0.0113603	42457	0.469599	8.33539e-06	0.317334	1331	Brain_age_gap	TRUE	0.0147231	1.23169e-05	TRUE	2.13929e-05
rs7558967	2	174111412	T	C	T	C	-2.24042	0.022046	0.09316	0.151601	FALSE	FALSE	FALSE	ebi-a-GCST003116	0.0133058	42457	0.0975461	2.05553e-06	0.471878	1331	Brain_age_gap	TRUE	0.016679	6.46578e-05	TRUE	1.23171e-05
rs78364213	8	112683091	A	G	A	G	2.31826	-0.010346	0.07325	0.071929	FALSE	FALSE	FALSE	ebi-a-GCST003116	0.0181886	42457	0.569481	8.3057e-06	0.520121	1331	Brain_age_gap	TRUE	0.0147281	7.62104e-06	TRUE	1.8904e-05
rs985145	6	40380712	T	C	T	C	-1.30693	0.001845	0.3107	0.342578	FALSE	FALSE	FALSE	ebi-a-GCST003116	0.0100166	42457	0.853861	7.60901e-06	0.291994	1331	Brain_age_gap	TRUE	0.0148504	7.9914e-07	TRUE	1.2843e-05
rs9878089	3	7965744	G	A	G	A	-1.26464	0.000718	0.4621	0.467367	FALSE	FALSE	FALSE	ebi-a-GCST003116	0.0092714	42457	0.938271	3.67853e-06	0.273213	1331	Brain_age_gap	TRUE	0.0158657	1.41263e-07	TRUE	5.87976e-06
rs10490016	2	234875139	C	T	C	T	-2.81082	0.0198026	0.05297		FALSE	FALSE	FALSE	ebi-a-GCST005047	0.0338648	12171	0.43	3.88386e-06	0.608733	1331	Brain_age_gap	TRUE	0.0157898	2.80983e-05	TRUE	2.81753e-05
rs16863620	3	188581424	A	G	A	G	-1.57222	0.0198026	0.1882		FALSE	FALSE	FALSE	ebi-a-GCST005047	0.0147896	12171	0.25	8.14224e-06	0.352405	1331	Brain_age_gap	TRUE	0.0147558	0.000147303	TRUE	0.000142293
rs182456433	14	74367564	T	C	T	C	2.85993	0.0295588	0.05409		FALSE	FALSE	FALSE	ebi-a-GCST005047	0.0194387	12171	0.0739997	2.83971e-06	0.610825	1331	Brain_age_gap	TRUE	0.0162274	0.000189977	TRUE	7.65346e-05
rs35633	16	23704005	T	C	T	C	1.43766	-0.00995033	0.2213		FALSE	FALSE	FALSE	ebi-a-GCST005047	0.0153842	12171	0.7	9.87947e-06	0.325278	1331	Brain_age_gap	TRUE	0.0144858	3.4376e-05	TRUE	6.83254e-05
rs4365591	3	72021775	C	T	C	T	-2.15224	0.00995033	0.08565		FALSE	FALSE	FALSE	ebi-a-GCST005047	0.0198162	12171	0.719999	9.22206e-06	0.485322	1331	Brain_age_gap	TRUE	0.0145819	2.07191e-05	TRUE	5.31289e-05
rs7110255	11	4784679	A	C	A	C	1.41416	0.0295588	0.2412		FALSE	FALSE	FALSE	ebi-a-GCST005047	0.0194387	12171	0.0879995	8.33539e-06	0.317334	1331	Brain_age_gap	TRUE	0.0147231	0.000189977	TRUE	0.000182246
rs7558967	2	174111412	T	C	T	C	-2.24042	-0.00995033	0.09316		FALSE	FALSE	FALSE	ebi-a-GCST005047	0.0312467	12171	0.75	2.05553e-06	0.471878	1331	Brain_age_gap	TRUE	0.016679	8.33313e-06	TRUE	1.11276e-05
rs78364213	8	112693244	A	G	A	G	2.31826	-0.00995033	0.07325		FALSE	FALSE	FALSE	ebi-a-GCST005047	0.0259042	12171	0.64	8.3057e-06	0.520121	1331	Brain_age_gap	TRUE	0.0147281	1.21248e-05	TRUE	4.13811e-05
rs985145	6	40380712	T	C	T	C	-1.30693	-0.00995033	0.3107		FALSE	FALSE	FALSE	ebi-a-GCST005047	0.0149339	12171	0.46	7.60901e-06	0.291994	1331	Brain_age_gap	TRUE	0.0148504	3.64802e-05	TRUE	5.60653e-05
rs9878089	3	7965744	G	A	G	A	-1.26464	0.00995033	0.4621		FALSE	FALSE	FALSE	ebi-a-GCST005047	0.0102044	12171	0.29	3.67853e-06	0.273213	1331	Brain_age_gap	TRUE	0.0158657	7.81288e-05	TRUE	4.58366e-05
rs1999999	1	240714262	T	G	T	G	-1.82443	0.00697561	0.1405		FALSE	FALSE	FALSE	ebi-a-GCST005536	0.0269059	18856	0.795435	6.69697e-06	0.40515	1331	Brain_age_gap	TRUE	0.0150287	3.56504e-06	TRUE	1.92614e-05
rs10490016	2	234875139	C	T	C	T	-2.81082	0.025	0.05297	0.052	FALSE	FALSE	FALSE	ebi-a-GCST005838	0.0183	446696	0.1728	3.88386e-06	0.608733	1331	Brain_age_gap	TRUE	0.0157898	4.17798e-06	TRUE	6.11693e-06
rs16863620	3	188536690	A	G	A	G	-1.57222	-0.0095	0.1882	0.2976	FALSE	FALSE	FALSE	ebi-a-GCST005838	0.0099	446696	0.3359	8.14224e-06	0.352405	1331	Brain_age_gap	TRUE	0.0147558	2.06142e-06	TRUE	1.13439e-05
rs182456433	14	74307398	T	C	T	C	2.85993	-0.0033	0.05409	0.1996	FALSE	FALSE	FALSE	ebi-a-GCST005838	0.0134	446696	0.8048	2.83971e-06	0.610825	1331	Brain_age_gap	TRUE	0.0162274	1.35771e-07	TRUE	3.36438e-06
rs1999999	1	240714262	T	G	T	G	-1.82443	0.0084	0.1405	0.13	FALSE	FALSE	FALSE	ebi-a-GCST005838	0.0134	446696	0.5307	6.69697e-06	0.40515	1331	Brain_age_gap	TRUE	0.0150287	8.79708e-07	TRUE	8.61719e-06
rs35633	16	23704005	T	C	T	C	1.43766	0.0037	0.2213	0.2539	FALSE	FALSE	FALSE	ebi-a-GCST005838	0.0095	446696	0.697	9.87947e-06	0.325278	1331	Brain_age_gap	TRUE	0.0144858	3.39583e-07	TRUE	1.18877e-05
rs4365591	3	72021775	C	T	C	T	-2.15224	0.008	0.08565	0.127	FALSE	FALSE	FALSE	ebi-a-GCST005838	0.0127	446696	0.5308	9.22206e-06	0.485322	1331	Brain_age_gap	TRUE	0.0145819	8.88305e-07	TRUE	1.1799e-05
rs7110255	11	4784113	A	C	A	C	1.41416	0.0093	0.2412	0.2683	FALSE	FALSE	FALSE	ebi-a-GCST005838	0.0097	446696	0.3398	8.33539e-06	0.317334	1331	Brain_age_gap	TRUE	0.0147231	2.05784e-06	TRUE	1.16041e-05
rs7558967	2	174111412	T	C	T	C	-2.24042	0.0221	0.09316	0.2944	FALSE	FALSE	FALSE	ebi-a-GCST005838	0.0107	446696	0.0382904	2.05553e-06	0.471878	1331	Brain_age_gap	TRUE	0.016679	9.54999e-06	TRUE	3.96297e-06
rs78364213	8	112683091	A	G	A	G	2.31826	0.0008	0.07325	0.0909	FALSE	FALSE	FALSE	ebi-a-GCST005838	0.0153	446696	0.9595	8.3057e-06	0.520121	1331	Brain_age_gap	TRUE	0.0147281	6.1205e-09	TRUE	9.20694e-06
rs985145	6	40380712	T	C	T	C	-1.30693	0.0078	0.3107	0.3487	FALSE	FALSE	FALSE	ebi-a-GCST005838	0.0085	446696	0.356	7.60901e-06	0.291994	1331	Brain_age_gap	TRUE	0.0148504	1.88513e-06	TRUE	1.05068e-05
rs9878089	3	7965744	G	A	G	A	-1.26464	-0.0076	0.4621	0.4686	FALSE	FALSE	FALSE	ebi-a-GCST005838	0.0078	446696	0.3317	3.67853e-06	0.273213	1331	Brain_age_gap	TRUE	0.0158657	2.12533e-06	TRUE	5.24384e-06
rs10490016	2	234875139	C	T	C	T	-2.81082	0.0275	0.05297	0.0523	FALSE	FALSE	FALSE	ebi-a-GCST005843	0.0195	440328	0.16	3.88386e-06	0.608733	1331	Brain_age_gap	TRUE	0.0157898	4.51669e-06	TRUE	6.2058e-06
rs16863620	3	188536690	A	G	A	G	-1.57222	-0.0116	0.1882	0.31	FALSE	FALSE	FALSE	ebi-a-GCST005843	0.0105	440328	0.2675	8.14224e-06	0.352405	1331	Brain_age_gap	TRUE	0.0147558	2.7718e-06	TRUE	1.17919e-05
rs17178441	6	29708466	T	C	T	C	-2.68141	-0.0168	0.05334	0.0782	FALSE	FALSE	FALSE	ebi-a-GCST005843	0.0265	440328	0.5276	8.57525e-06	0.602524	1331	Brain_age_gap	TRUE	0.0146835	9.12751e-07	TRUE	1.1016e-05
rs182456433	14	74307398	T	C	T	C	2.85993	-0.0084	0.05409	0.2013	FALSE	FALSE	FALSE	ebi-a-GCST005843	0.0135	440328	0.535	2.83971e-06	0.610825	1331	Brain_age_gap	TRUE	0.0162274	8.79258e-07	TRUE	3.72061e-06
rs1999999	1	240714262	T	G	T	G	-1.82443	0.0132	0.1405	0.1302	FALSE	FALSE	FALSE	ebi-a-GCST005843	0.0142	440328	0.3496	6.69697e-06	0.40515	1331	Brain_age_gap	TRUE	0.0150287	1.96244e-06	TRUE	9.32304e-06
rs35633	16	23704005	T	C	T	C	1.43766	0.0007	0.2213	0.262	FALSE	FALSE	FALSE	ebi-a-GCST005843	0.0102	440328	0.9491	9.87947e-06	0.325278	1331	Brain_age_gap	TRUE	0.0144858	1.0696e-08	TRUE	1.09765e-05
rs4365591	3	72021775	C	T	C	T	-2.15224	-0.0024	0.08565	0.1312	FALSE	FALSE	FALSE	ebi-a-GCST005843	0.0134	440328	0.8606	9.22206e-06	0.485322	1331	Brain_age_gap	TRUE	0.0145819	7.28515e-08	TRUE	1.05468e-05
rs7110255	11	4784113	A	C	A	C	1.41416	0.0082	0.2412	0.271	FALSE	FALSE	FALSE	ebi-a-GCST005843	0.0104	440328	0.4275	8.33539e-06	0.317334	1331	Brain_age_gap	TRUE	0.0147231	1.41184e-06	TRUE	1.11404e-05
rs7558967	2	174111412	T	C	T	C	-2.24042	0.0163	0.09316	0.3071	FALSE	FALSE	FALSE	ebi-a-GCST005843	0.0111	440328	0.1413	2.05553e-06	0.471878	1331	Brain_age_gap	TRUE	0.016679	4.89726e-06	TRUE	3.39846e-06
rs78364213	8	112683091	A	G	A	G	2.31826	0.0071	0.07325	0.0932	FALSE	FALSE	FALSE	ebi-a-GCST005843	0.0162	440328	0.661301	8.3057e-06	0.520121	1331	Brain_age_gap	TRUE	0.0147281	4.36227e-07	TRUE	1.01607e-05
rs985145	6	40380712	T	C	T	C	-1.30693	0.009	0.3107	0.3495	FALSE	FALSE	FALSE	ebi-a-GCST005843	0.009	440328	0.3209	7.60901e-06	0.291994	1331	Brain_age_gap	TRUE	0.0148504	2.27104e-06	TRUE	1.07505e-05
rs9878089	3	7965744	G	A	G	A	-1.26464	-0.007	0.4621	0.4712	FALSE	FALSE	FALSE	ebi-a-GCST005843	0.0083	440328	0.4006	3.67853e-06	0.273213	1331	Brain_age_gap	TRUE	0.0158657	1.61534e-06	TRUE	5.07917e-06
rs10490016	2	234875139	C	T	C	T	-2.81082	0.0278526	0.05297	0.053683	FALSE	FALSE	FALSE	ebi-a-GCST011364	0.0239651	17505	0.25	3.88386e-06	0.608733	1331	Brain_age_gap	TRUE	0.0157898	7.71662e-05	TRUE	3.6343e-05
rs16863620	3	188536690	A	G	A	G	-1.57222	0.0249842	0.1882	0.186904	FALSE	FALSE	FALSE	ebi-a-GCST011364	0.0138955	17505	0.0719996	8.14224e-06	0.352405	1331	Brain_age_gap	TRUE	0.0147558	0.000184667	TRUE	0.000138143
rs17178441	6	29708466	T	C	T	C	-2.68141	0.094628	0.05334	0.040404	FALSE	FALSE	FALSE	ebi-a-GCST011364	0.0273154	17505	0.000530005	8.57525e-06	0.602524	1331	Brain_age_gap	TRUE	0.0146835	0.000685195	TRUE	0.000783852
rs182456433	14	74307398	T	C	T	C	2.85993	0.0042957	0.05409	0.057392	FALSE	FALSE	FALSE	ebi-a-GCST011364	0.0235193	17505	0.86	2.83971e-06	0.610825	1331	Brain_age_gap	TRUE	0.0162274	1.90592e-06	TRUE	8.52935e-06
rs1999999	1	240714262	T	G	T	G	-1.82443	-0.00157482	0.1405	0.133297	FALSE	FALSE	FALSE	ebi-a-GCST011364	0.0161166	17505	0.92	6.69697e-06	0.40515	1331	Brain_age_gap	TRUE	0.0150287	5.45509e-07	TRUE	1.68607e-05
rs35633	16	23704005	T	C	T	C	1.43766	0.0147137	0.2213	0.209647	FALSE	FALSE	FALSE	ebi-a-GCST011364	0.0132091	17505	0.27	9.87947e-06	0.325278	1331	Brain_age_gap	TRUE	0.0144858	7.0885e-05	TRUE	7.70755e-05
rs4365591	3	72021775	C	T	C	T	-2.15224	0.0216771	0.08565	0.09676	FALSE	FALSE	FALSE	ebi-a-GCST011364	0.0181587	17505	0.23	9.22206e-06	0.485322	1331	Brain_age_gap	TRUE	0.0145819	8.14114e-05	TRUE	7.93593e-05
rs7110255	11	4784113	A	C	A	C	1.41416	-0.0183821	0.2412	0.257125	FALSE	FALSE	FALSE	ebi-a-GCST011364	0.0123265	17505	0.14	8.33539e-06	0.317334	1331	Brain_age_gap	TRUE	0.0147231	0.000127041	TRUE	0.000101027
rs7558967	2	174111412	T	C	T	C	-2.24042	0.00697053	0.09316	0.112989	FALSE	FALSE	FALSE	ebi-a-GCST011364	0.0172201	17505	0.69	2.05553e-06	0.471878	1331	Brain_age_gap	TRUE	0.016679	9.36146e-06	TRUE	8.37581e-06
rs78364213	8	112683091	A	G	A	G	2.31826	0.0102575	0.07325	0.076497	FALSE	FALSE	FALSE	ebi-a-GCST011364	0.0201848	17505	0.61	8.3057e-06	0.520121	1331	Brain_age_gap	TRUE	0.0147281	1.47542e-05	TRUE	3.32614e-05
rs985145	6	40380712	T	C	T	C	-1.30693	-0.0144516	0.3107	0.336869	FALSE	FALSE	FALSE	ebi-a-GCST011364	0.0114699	17505	0.21	7.60901e-06	0.291994	1331	Brain_age_gap	TRUE	0.0148504	9.06903e-05	TRUE	7.24161e-05
rs9878089	3	7965744	G	A	G	A	-1.26464	-0.00431842	0.4621	0.437608	FALSE	FALSE	FALSE	ebi-a-GCST011364	0.010806	17505	0.69	3.67853e-06	0.273213	1331	Brain_age_gap	TRUE	0.0158657	9.12438e-06	TRUE	1.40644e-05
rs10490016	2	234875139	C	T	C	T	-2.81082	0.0192966	0.05297		FALSE	FALSE	FALSE	ebi-a-GCST90013864	0.0200628	352063	0.336146	3.88386e-06	0.608733	1331	Brain_age_gap	TRUE	0.0157898	2.6276e-06	TRUE	5.73603e-06
rs16863620	3	188536690	A	G	A	G	-1.57222	0.0196916	0.1882		FALSE	FALSE	FALSE	ebi-a-GCST90013864	0.0118868	352063	0.0976023	8.14224e-06	0.352405	1331	Brain_age_gap	TRUE	0.0147558	7.7949e-06	TRUE	1.43293e-05
rs17178441	6	29708466	T	C	T	C	-2.68141	0.0252992	0.05334		FALSE	FALSE	FALSE	ebi-a-GCST90013864	0.0237006	352063	0.285768	8.57525e-06	0.602524	1331	Brain_age_gap	TRUE	0.0146835	3.2365e-06	TRUE	1.27786e-05
rs182456433	14	74307398	T	C	T	C	2.85993	0.0174537	0.05409		FALSE	FALSE	FALSE	ebi-a-GCST90013864	0.0204871	352063	0.394249	2.83971e-06	0.610825	1331	Brain_age_gap	TRUE	0.0162274	2.06156e-06	TRUE	4.0941e-06
rs1999999	1	240714262	T	G	T	G	-1.82443	0.0179342	0.1405		FALSE	FALSE	FALSE	ebi-a-GCST90013864	0.0134054	352063	0.180951	6.69697e-06	0.40515	1331	Brain_age_gap	TRUE	0.0150287	5.08375e-06	TRUE	1.08461e-05
rs35633	16	23704005	T	C	T	C	1.43766	0.0109977	0.2213		FALSE	FALSE	FALSE	ebi-a-GCST90013864	0.0111392	352063	0.323497	9.87947e-06	0.325278	1331	Brain_age_gap	TRUE	0.0144858	2.7687e-06	TRUE	1.43415e-05
rs4365591	3	72021775	C	T	C	T	-2.15224	0.015226	0.08565		FALSE	FALSE	FALSE	ebi-a-GCST90013864	0.0153647	352063	0.321697	9.22206e-06	0.485322	1331	Brain_age_gap	TRUE	0.0145819	2.78936e-06	TRUE	1.34251e-05
rs7110255	11	4784113	A	C	A	C	1.41416	-0.0220664	0.2412		FALSE	FALSE	FALSE	ebi-a-GCST90013864	0.0104867	352063	0.0351253	8.33539e-06	0.317334	1331	Brain_age_gap	TRUE	0.0147231	1.25766e-05	TRUE	1.65981e-05
rs7558967	2	174111412	T	C	T	C	-2.24042	-0.0174619	0.09316		FALSE	FALSE	FALSE	ebi-a-GCST90013864	0.0151255	352063	0.248306	2.05553e-06	0.471878	1331	Brain_age_gap	TRUE	0.016679	3.78568e-06	TRUE	3.26962e-06
rs78364213	8	112683091	A	G	A	G	2.31826	0.00154396	0.07325		FALSE	FALSE	FALSE	ebi-a-GCST90013864	0.0172393	352063	0.928636	8.3057e-06	0.520121	1331	Brain_age_gap	TRUE	0.0147281	2.27832e-08	TRUE	9.39728e-06
rs985145	6	40380712	T	C	T	C	-1.30693	0.00489605	0.3107		FALSE	FALSE	FALSE	ebi-a-GCST90013864	0.00963769	352063	0.611446	7.60901e-06	0.291994	1331	Brain_age_gap	TRUE	0.0148504	7.3304e-07	TRUE	9.7108e-06
rs9878089	3	7965744	G	A	G	A	-1.26464	0.00958719	0.4621		FALSE	FALSE	FALSE	ebi-a-GCST90013864	0.00913525	352063	0.293961	3.67853e-06	0.273213	1331	Brain_age_gap	TRUE	0.0158657	3.1284e-06	TRUE	5.58112e-06
rs10490016	2	234875139	C	T	C	T	-2.81082	0.0192966	0.05297		FALSE	FALSE	FALSE	ebi-a-GCST90013868	0.0200628	352063	0.336146	3.88386e-06	0.608733	1331	Brain_age_gap	TRUE	0.0157898	2.6276e-06	TRUE	5.73603e-06
rs16863620	3	188536690	A	G	A	G	-1.57222	0.0196916	0.1882		FALSE	FALSE	FALSE	ebi-a-GCST90013868	0.0118868	352063	0.0976023	8.14224e-06	0.352405	1331	Brain_age_gap	TRUE	0.0147558	7.7949e-06	TRUE	1.43293e-05
rs17178441	6	29708466	T	C	T	C	-2.68141	0.0252992	0.05334		FALSE	FALSE	FALSE	ebi-a-GCST90013868	0.0237006	352063	0.285768	8.57525e-06	0.602524	1331	Brain_age_gap	TRUE	0.0146835	3.2365e-06	TRUE	1.27786e-05
rs182456433	14	74307398	T	C	T	C	2.85993	0.0174537	0.05409		FALSE	FALSE	FALSE	ebi-a-GCST90013868	0.0204871	352063	0.394249	2.83971e-06	0.610825	1331	Brain_age_gap	TRUE	0.0162274	2.06156e-06	TRUE	4.0941e-06
rs1999999	1	240714262	T	G	T	G	-1.82443	0.0179342	0.1405		FALSE	FALSE	FALSE	ebi-a-GCST90013868	0.0134054	352063	0.180951	6.69697e-06	0.40515	1331	Brain_age_gap	TRUE	0.0150287	5.08375e-06	TRUE	1.08461e-05
rs35633	16	23704005	T	C	T	C	1.43766	0.0109977	0.2213		FALSE	FALSE	FALSE	ebi-a-GCST90013868	0.0111392	352063	0.323497	9.87947e-06	0.325278	1331	Brain_age_gap	TRUE	0.0144858	2.7687e-06	TRUE	1.43415e-05
rs4365591	3	72021775	C	T	C	T	-2.15224	0.015226	0.08565		FALSE	FALSE	FALSE	ebi-a-GCST90013868	0.0153647	352063	0.321697	9.22206e-06	0.485322	1331	Brain_age_gap	TRUE	0.0145819	2.78936e-06	TRUE	1.34251e-05
rs7110255	11	4784113	A	C	A	C	1.41416	-0.022035	0.2412		FALSE	FALSE	FALSE	ebi-a-GCST90013868	0.0104475	352063	0.0349341	8.33539e-06	0.317334	1331	Brain_age_gap	TRUE	0.0147231	1.26351e-05	TRUE	1.66206e-05
rs7558967	2	174111412	T	C	T	C	-2.24042	-0.0174619	0.09316		FALSE	FALSE	FALSE	ebi-a-GCST90013868	0.0151255	352063	0.248306	2.05553e-06	0.471878	1331	Brain_age_gap	TRUE	0.016679	3.78568e-06	TRUE	3.26962e-06
rs78364213	8	112683091	A	G	A	G	2.31826	0.00154396	0.07325		FALSE	FALSE	FALSE	ebi-a-GCST90013868	0.0172393	352063	0.928636	8.3057e-06	0.520121	1331	Brain_age_gap	TRUE	0.0147281	2.27832e-08	TRUE	9.39728e-06
rs985145	6	40380712	T	C	T	C	-1.30693	0.00489605	0.3107		FALSE	FALSE	FALSE	ebi-a-GCST90013868	0.00963769	352063	0.611446	7.60901e-06	0.291994	1331	Brain_age_gap	TRUE	0.0148504	7.3304e-07	TRUE	9.7108e-06
rs9878089	3	7965744	G	A	G	A	-1.26464	0.00958719	0.4621		FALSE	FALSE	FALSE	ebi-a-GCST90013868	0.00913525	352063	0.293961	3.67853e-06	0.273213	1331	Brain_age_gap	TRUE	0.0158657	3.1284e-06	TRUE	5.58112e-06
rs10490016	2	234875139	C	T	C	T	-2.81082	-0.0033039	0.05297		FALSE	FALSE	FALSE	ebi-a-GCST90013891	0.157924	407746	0.983309	3.88386e-06	0.608733	1331	Brain_age_gap	TRUE	0.0157898	1.07342e-09	TRUE	4.33079e-06
rs16863620	3	188536690	A	G	A	G	-1.57222	-0.0496976	0.1882		FALSE	FALSE	FALSE	ebi-a-GCST90013891	0.0939454	407746	0.596802	8.14224e-06	0.352405	1331	Brain_age_gap	TRUE	0.0147558	6.86328e-07	TRUE	1.0275e-05
rs17178441	6	29708466	T	C	T	C	-2.68141	0.0159247	0.05334		FALSE	FALSE	FALSE	ebi-a-GCST90013891	0.187954	407746	0.932479	8.57525e-06	0.602524	1331	Brain_age_gap	TRUE	0.0146835	1.76056e-08	TRUE	9.6171e-06
rs182456433	14	74307398	T	C	T	C	2.85993	-0.0369046	0.05409		FALSE	FALSE	FALSE	ebi-a-GCST90013891	0.161727	407746	0.819498	2.83971e-06	0.610825	1331	Brain_age_gap	TRUE	0.0162274	1.27705e-07	TRUE	3.36851e-06
rs1999999	1	240714262	T	G	T	G	-1.82443	0.0869181	0.1405		FALSE	FALSE	FALSE	ebi-a-GCST90013891	0.10591	407746	0.411828	6.69697e-06	0.40515	1331	Brain_age_gap	TRUE	0.0150287	1.6518e-06	TRUE	9.16537e-06
rs35633	16	23704005	T	C	T	C	1.43766	-0.0317418	0.2213		FALSE	FALSE	FALSE	ebi-a-GCST90013891	0.0882522	407746	0.719093	9.87947e-06	0.325278	1331	Brain_age_gap	TRUE	0.0144858	3.17267e-07	TRUE	1.18829e-05
rs4365591	3	72021775	C	T	C	T	-2.15224	0.1605	0.08565		FALSE	FALSE	FALSE	ebi-a-GCST90013891	0.121592	407746	0.186837	9.22206e-06	0.485322	1331	Brain_age_gap	TRUE	0.0145819	4.27317e-06	TRUE	1.42657e-05
rs7110255	11	4784113	A	C	A	C	1.41416	-0.0966799	0.2412		FALSE	FALSE	FALSE	ebi-a-GCST90013891	0.0824378	407746	0.240891	8.33539e-06	0.317334	1331	Brain_age_gap	TRUE	0.0147231	3.37311e-06	TRUE	1.24448e-05
rs7558967	2	174111412	T	C	T	C	-2.24042	0.206958	0.09316		FALSE	FALSE	FALSE	ebi-a-GCST90013891	0.119137	407746	0.0823626	2.05553e-06	0.471878	1331	Brain_age_gap	TRUE	0.016679	7.40083e-06	TRUE	3.72582e-06
rs78364213	8	112683091	A	G	A	G	2.31826	0.0662079	0.07325		FALSE	FALSE	FALSE	ebi-a-GCST90013891	0.13626	407746	0.627043	8.3057e-06	0.520121	1331	Brain_age_gap	TRUE	0.0147281	5.79022e-07	TRUE	1.0359e-05
rs985145	6	40380712	T	C	T	C	-1.30693	-0.0838674	0.3107		FALSE	FALSE	FALSE	ebi-a-GCST90013891	0.0760637	407746	0.270203	7.60901e-06	0.291994	1331	Brain_age_gap	TRUE	0.0148504	2.98155e-06	TRUE	1.11809e-05
rs9878089	3	7965744	G	A	G	A	-1.26464	-0.0136879	0.4621		FALSE	FALSE	FALSE	ebi-a-GCST90013891	0.0720466	407746	0.849319	3.67853e-06	0.273213	1331	Brain_age_gap	TRUE	0.0158657	8.85236e-08	TRUE	4.29938e-06
rs10490016	2	234875139	C	T	C	T	-2.81082	0.0294782	0.05297		FALSE	FALSE	FALSE	ebi-a-GCST90013892	0.0235119	406831	0.20993	3.88386e-06	0.608733	1331	Brain_age_gap	TRUE	0.0157898	3.86378e-06	TRUE	6.05382e-06
rs16863620	3	188536690	A	G	A	G	-1.57222	0.01232	0.1882		FALSE	FALSE	FALSE	ebi-a-GCST90013892	0.0139657	406831	0.37769	8.14224e-06	0.352405	1331	Brain_age_gap	TRUE	0.0147558	1.91286e-06	TRUE	1.12773e-05
rs17178441	6	29708466	T	C	T	C	-2.68141	-0.0124643	0.05334		FALSE	FALSE	FALSE	ebi-a-GCST90013892	0.0278809	406831	0.654835	8.57525e-06	0.602524	1331	Brain_age_gap	TRUE	0.0146835	4.91259e-07	TRUE	1.05823e-05
rs182456433	14	74307398	T	C	T	C	2.85993	0.0500024	0.05409		FALSE	FALSE	FALSE	ebi-a-GCST90013892	0.0236513	406831	0.0356451	2.83971e-06	0.610825	1331	Brain_age_gap	TRUE	0.0162274	1.09864e-05	TRUE	5.64255e-06
rs1999999	1	240714262	T	G	T	G	-1.82443	-0.00500384	0.1405		FALSE	FALSE	FALSE	ebi-a-GCST90013892	0.0157334	406831	0.750454	6.69697e-06	0.40515	1331	Brain_age_gap	TRUE	0.0150287	2.48628e-07	TRUE	8.02246e-06
rs35633	16	23704005	T	C	T	C	1.43766	0.00501014	0.2213		FALSE	FALSE	FALSE	ebi-a-GCST90013892	0.0130953	406831	0.702024	9.87947e-06	0.325278	1331	Brain_age_gap	TRUE	0.0144858	3.59796e-07	TRUE	1.19565e-05
rs4365591	3	72021775	C	T	C	T	-2.15224	0.0163638	0.08565		FALSE	FALSE	FALSE	ebi-a-GCST90013892	0.018051	406831	0.364654	9.22206e-06	0.485322	1331	Brain_age_gap	TRUE	0.0145819	2.02001e-06	TRUE	1.28165e-05
rs7110255	11	4784113	A	C	A	C	1.41416	-0.00612245	0.2412		FALSE	FALSE	FALSE	ebi-a-GCST90013892	0.0122736	406831	0.617897	8.33539e-06	0.317334	1331	Brain_age_gap	TRUE	0.0147231	6.11638e-07	TRUE	1.04331e-05
rs7558967	2	174111412	T	C	T	C	-2.24042	0.00652022	0.09316		FALSE	FALSE	FALSE	ebi-a-GCST90013892	0.0177786	406831	0.713809	2.05553e-06	0.471878	1331	Brain_age_gap	TRUE	0.016679	3.30611e-07	TRUE	2.54915e-06
rs78364213	8	112683091	A	G	A	G	2.31826	0.0150672	0.07325		FALSE	FALSE	FALSE	ebi-a-GCST90013892	0.0202509	406831	0.456859	8.3057e-06	0.520121	1331	Brain_age_gap	TRUE	0.0147281	1.3607e-06	TRUE	1.1089e-05
rs985145	6	40380712	T	C	T	C	-1.30693	-0.0025234	0.3107		FALSE	FALSE	FALSE	ebi-a-GCST90013892	0.0113321	406831	0.823787	7.60901e-06	0.291994	1331	Brain_age_gap	TRUE	0.0148504	1.21882e-07	TRUE	8.86792e-06
rs9878089	3	7965744	G	A	G	A	-1.26464	0.00884065	0.4621		FALSE	FALSE	FALSE	ebi-a-GCST90013892	0.0107289	406831	0.409939	3.67853e-06	0.273213	1331	Brain_age_gap	TRUE	0.0158657	1.66896e-06	TRUE	5.11134e-06
rs10490016	2	234875139	C	T	C	T	-2.81082	-0.0033039	0.05297		FALSE	FALSE	FALSE	ebi-a-GCST90013941	0.157924	407746	0.983309	3.88386e-06	0.608733	1331	Brain_age_gap	TRUE	0.0157898	1.07342e-09	TRUE	4.33079e-06
rs16863620	3	188536690	A	G	A	G	-1.57222	-0.0496976	0.1882		FALSE	FALSE	FALSE	ebi-a-GCST90013941	0.0939454	407746	0.596802	8.14224e-06	0.352405	1331	Brain_age_gap	TRUE	0.0147558	6.86328e-07	TRUE	1.0275e-05
rs17178441	6	29708466	T	C	T	C	-2.68141	0.0159247	0.05334		FALSE	FALSE	FALSE	ebi-a-GCST90013941	0.187954	407746	0.932479	8.57525e-06	0.602524	1331	Brain_age_gap	TRUE	0.0146835	1.76056e-08	TRUE	9.6171e-06
rs182456433	14	74307398	T	C	T	C	2.85993	-0.0369046	0.05409		FALSE	FALSE	FALSE	ebi-a-GCST90013941	0.161727	407746	0.819498	2.83971e-06	0.610825	1331	Brain_age_gap	TRUE	0.0162274	1.27705e-07	TRUE	3.36851e-06
rs1999999	1	240714262	T	G	T	G	-1.82443	0.0869181	0.1405		FALSE	FALSE	FALSE	ebi-a-GCST90013941	0.10591	407746	0.411828	6.69697e-06	0.40515	1331	Brain_age_gap	TRUE	0.0150287	1.6518e-06	TRUE	9.16537e-06
rs35633	16	23704005	T	C	T	C	1.43766	-0.0317418	0.2213		FALSE	FALSE	FALSE	ebi-a-GCST90013941	0.0882522	407746	0.719093	9.87947e-06	0.325278	1331	Brain_age_gap	TRUE	0.0144858	3.17267e-07	TRUE	1.18829e-05
rs4365591	3	72021775	C	T	C	T	-2.15224	0.1605	0.08565		FALSE	FALSE	FALSE	ebi-a-GCST90013941	0.121592	407746	0.186837	9.22206e-06	0.485322	1331	Brain_age_gap	TRUE	0.0145819	4.27317e-06	TRUE	1.42657e-05
rs7110255	11	4784113	A	C	A	C	1.41416	-0.0966799	0.2412		FALSE	FALSE	FALSE	ebi-a-GCST90013941	0.0824378	407746	0.240891	8.33539e-06	0.317334	1331	Brain_age_gap	TRUE	0.0147231	3.37311e-06	TRUE	1.24448e-05
rs7558967	2	174111412	T	C	T	C	-2.24042	0.206958	0.09316		FALSE	FALSE	FALSE	ebi-a-GCST90013941	0.119137	407746	0.0823626	2.05553e-06	0.471878	1331	Brain_age_gap	TRUE	0.016679	7.40083e-06	TRUE	3.72582e-06
rs78364213	8	112683091	A	G	A	G	2.31826	0.0662079	0.07325		FALSE	FALSE	FALSE	ebi-a-GCST90013941	0.13626	407746	0.627043	8.3057e-06	0.520121	1331	Brain_age_gap	TRUE	0.0147281	5.79022e-07	TRUE	1.0359e-05
rs985145	6	40380712	T	C	T	C	-1.30693	-0.0838674	0.3107		FALSE	FALSE	FALSE	ebi-a-GCST90013941	0.0760637	407746	0.270203	7.60901e-06	0.291994	1331	Brain_age_gap	TRUE	0.0148504	2.98155e-06	TRUE	1.11809e-05
rs9878089	3	7965744	G	A	G	A	-1.26464	-0.0136879	0.4621		FALSE	FALSE	FALSE	ebi-a-GCST90013941	0.0720466	407746	0.849319	3.67853e-06	0.273213	1331	Brain_age_gap	TRUE	0.0158657	8.85236e-08	TRUE	4.29938e-06
rs10490016	2	234875139	C	T	C	T	-2.81082	0.0294782	0.05297		FALSE	FALSE	FALSE	ebi-a-GCST90013942	0.0235119	406831	0.20993	3.88386e-06	0.608733	1331	Brain_age_gap	TRUE	0.0157898	3.86378e-06	TRUE	6.05382e-06
rs16863620	3	188536690	A	G	A	G	-1.57222	0.01232	0.1882		FALSE	FALSE	FALSE	ebi-a-GCST90013942	0.0139657	406831	0.37769	8.14224e-06	0.352405	1331	Brain_age_gap	TRUE	0.0147558	1.91286e-06	TRUE	1.12773e-05
rs17178441	6	29708466	T	C	T	C	-2.68141	-0.0124643	0.05334		FALSE	FALSE	FALSE	ebi-a-GCST90013942	0.0278809	406831	0.654835	8.57525e-06	0.602524	1331	Brain_age_gap	TRUE	0.0146835	4.91259e-07	TRUE	1.05823e-05
rs182456433	14	74307398	T	C	T	C	2.85993	0.0505054	0.05409		FALSE	FALSE	FALSE	ebi-a-GCST90013942	0.024105	406831	0.036151	2.83971e-06	0.610825	1331	Brain_age_gap	TRUE	0.0162274	1.07906e-05	TRUE	5.61374e-06
rs1999999	1	240714262	T	G	T	G	-1.82443	-0.00500384	0.1405		FALSE	FALSE	FALSE	ebi-a-GCST90013942	0.0157334	406831	0.750454	6.69697e-06	0.40515	1331	Brain_age_gap	TRUE	0.0150287	2.48628e-07	TRUE	8.02246e-06
rs35633	16	23704005	T	C	T	C	1.43766	0.00501014	0.2213		FALSE	FALSE	FALSE	ebi-a-GCST90013942	0.0130953	406831	0.702024	9.87947e-06	0.325278	1331	Brain_age_gap	TRUE	0.0144858	3.59796e-07	TRUE	1.19565e-05
rs4365591	3	72021775	C	T	C	T	-2.15224	0.0163638	0.08565		FALSE	FALSE	FALSE	ebi-a-GCST90013942	0.018051	406831	0.364654	9.22206e-06	0.485322	1331	Brain_age_gap	TRUE	0.0145819	2.02001e-06	TRUE	1.28165e-05
rs7110255	11	4784113	A	C	A	C	1.41416	-0.00612245	0.2412		FALSE	FALSE	FALSE	ebi-a-GCST90013942	0.0122736	406831	0.617897	8.33539e-06	0.317334	1331	Brain_age_gap	TRUE	0.0147231	6.11638e-07	TRUE	1.04331e-05
rs7558967	2	174111412	T	C	T	C	-2.24042	0.00652022	0.09316		FALSE	FALSE	FALSE	ebi-a-GCST90013942	0.0177786	406831	0.713809	2.05553e-06	0.471878	1331	Brain_age_gap	TRUE	0.016679	3.30611e-07	TRUE	2.54915e-06
rs78364213	8	112683091	A	G	A	G	2.31826	0.0150672	0.07325		FALSE	FALSE	FALSE	ebi-a-GCST90013942	0.0202509	406831	0.456859	8.3057e-06	0.520121	1331	Brain_age_gap	TRUE	0.0147281	1.3607e-06	TRUE	1.1089e-05
rs985145	6	40380712	T	C	T	C	-1.30693	-0.0025234	0.3107		FALSE	FALSE	FALSE	ebi-a-GCST90013942	0.0113321	406831	0.823787	7.60901e-06	0.291994	1331	Brain_age_gap	TRUE	0.0148504	1.21882e-07	TRUE	8.86792e-06
rs9878089	3	7965744	G	A	G	A	-1.26464	0.00884065	0.4621		FALSE	FALSE	FALSE	ebi-a-GCST90013942	0.0107289	406831	0.409939	3.67853e-06	0.273213	1331	Brain_age_gap	TRUE	0.0158657	1.66896e-06	TRUE	5.11134e-06
rs10490016	2	234875139	C	T	C	T	-2.81082	0.0095	0.05297	0.0496159	FALSE	FALSE	FALSE	ebi-a-GCST90018793	0.018	470931	0.597601	3.88386e-06	0.608733	1331	Brain_age_gap	TRUE	0.0157898	5.91489e-07	TRUE	4.89947e-06
rs16863620	3	188536690	A	G	A	G	-1.57222	0.0092	0.1882	0.353309	FALSE	FALSE	FALSE	ebi-a-GCST90018793	0.01	470931	0.3552	8.14224e-06	0.352405	1331	Brain_age_gap	TRUE	0.0147558	1.7973e-06	TRUE	1.11475e-05
rs17178441	6	29708466	T	C	T	C	-2.68141	0.0462	0.05334	0.0423349	FALSE	FALSE	FALSE	ebi-a-GCST90018793	0.024	470931	0.0539598	8.57525e-06	0.602524	1331	Brain_age_gap	TRUE	0.0146835	7.86869e-06	TRUE	1.4957e-05
rs182456433	14	74307398	T	C	T	C	2.85993	0.0139	0.05409	0.13209	FALSE	FALSE	FALSE	ebi-a-GCST90018793	0.0115	470931	0.2285	2.83971e-06	0.610825	1331	Brain_age_gap	TRUE	0.0162274	3.10225e-06	TRUE	4.28847e-06
rs1999999	1	240714262	T	G	T	G	-1.82443	0.0155	0.1405	0.143239	FALSE	FALSE	FALSE	ebi-a-GCST90018793	0.0139	470931	0.2632	6.69697e-06	0.40515	1331	Brain_age_gap	TRUE	0.0150287	2.64045e-06	TRUE	9.66277e-06
rs35633	16	23704005	T	C	T	C	1.43766	0.0137	0.2213	0.276889	FALSE	FALSE	FALSE	ebi-a-GCST90018793	0.0088	470931	0.1185	9.87947e-06	0.325278	1331	Brain_age_gap	TRUE	0.0144858	5.14657e-06	TRUE	1.57006e-05
rs4365591	3	72021775	C	T	C	T	-2.15224	0.0021	0.08565	0.118234	FALSE	FALSE	FALSE	ebi-a-GCST90018793	0.0118	470931	0.8615	9.22206e-06	0.485322	1331	Brain_age_gap	TRUE	0.0145819	6.72542e-08	TRUE	1.05072e-05
rs7110255	11	4786170	A	C	A	C	1.41416	0.0037	0.2412	0.177487	FALSE	FALSE	FALSE	ebi-a-GCST90018793	0.0111	470931	0.7375	8.33539e-06	0.317334	1331	Brain_age_gap	TRUE	0.0147231	2.3594e-07	TRUE	9.88118e-06
rs7558967	2	174111412	T	C	T	C	-2.24042	-0.006	0.09316	0.234258	FALSE	FALSE	FALSE	ebi-a-GCST90018793	0.0103	470931	0.5632	2.05553e-06	0.471878	1331	Brain_age_gap	TRUE	0.016679	7.20564e-07	TRUE	2.66301e-06
rs78364213	8	112683091	A	G	A	G	2.31826	0.0028	0.07325	0.0539831	FALSE	FALSE	FALSE	ebi-a-GCST90018793	0.0181	470931	0.8764	8.3057e-06	0.520121	1331	Brain_age_gap	TRUE	0.0147281	5.08163e-08	TRUE	9.4238e-06
rs985145	6	40380712	T	C	T	C	-1.30693	0.0045	0.3107	0.308526	FALSE	FALSE	FALSE	ebi-a-GCST90018793	0.0085	470931	0.6019	7.60901e-06	0.291994	1331	Brain_age_gap	TRUE	0.0148504	5.95157e-07	TRUE	9.48041e-06
rs9878089	3	7965744	G	A	G	A	-1.26464	0.0036	0.4621	0.472698	FALSE	FALSE	FALSE	ebi-a-GCST90018793	0.0078	470931	0.6451	3.67853e-06	0.273213	1331	Brain_age_gap	TRUE	0.0158657	4.52335e-07	TRUE	4.56792e-06
rs10490016	2	234875139	C	T	C	T	-2.81082	0.0099	0.05297	0.0497567	FALSE	FALSE	FALSE	ebi-a-GCST90018890	0.034	483078	0.7703	3.88386e-06	0.608733	1331	Brain_age_gap	TRUE	0.0157898	1.75508e-07	TRUE	4.60658e-06
rs16863620	3	188536690	A	G	A	G	-1.57222	-0.0022	0.1882	0.363623	FALSE	FALSE	FALSE	ebi-a-GCST90018890	0.0176	483078	0.8985	8.14224e-06	0.352405	1331	Brain_age_gap	TRUE	0.0147558	3.23448e-08	TRUE	9.1635e-06
rs17178441	6	29708466	T	C	T	C	-2.68141	0.0081	0.05334	0.0424953	FALSE	FALSE	FALSE	ebi-a-GCST90018890	0.0421	483078	0.8469	8.57525e-06	0.602524	1331	Brain_age_gap	TRUE	0.0146835	7.66285e-08	TRUE	9.80255e-06
rs182456433	14	74307398	T	C	T	C	2.85993	0.0108	0.05409	0.13716	FALSE	FALSE	FALSE	ebi-a-GCST90018890	0.02	483078	0.589299	2.83971e-06	0.610825	1331	Brain_age_gap	TRUE	0.0162274	6.03631e-07	TRUE	3.60623e-06
rs1999999	1	240714262	T	G	T	G	-1.82443	0.0352	0.1405	0.143116	FALSE	FALSE	FALSE	ebi-a-GCST90018890	0.0253	483078	0.1646	6.69697e-06	0.40515	1331	Brain_age_gap	TRUE	0.0150287	4.00707e-06	TRUE	1.02881e-05
rs35633	16	23704005	T	C	T	C	1.43766	0.0066	0.2213	0.280408	FALSE	FALSE	FALSE	ebi-a-GCST90018890	0.0155	483078	0.6708	9.87947e-06	0.325278	1331	Brain_age_gap	TRUE	0.0144858	3.75326e-07	TRUE	1.19204e-05
rs4365591	3	72021775	C	T	C	T	-2.15224	0.0147	0.08565	0.120269	FALSE	FALSE	FALSE	ebi-a-GCST90018890	0.0216	483078	0.494899	9.22206e-06	0.485322	1331	Brain_age_gap	TRUE	0.0145819	9.58763e-07	TRUE	1.18448e-05
rs7110255	11	4784113	A	C	A	C	1.41416	-0.0259	0.2412	0.173266	FALSE	FALSE	FALSE	ebi-a-GCST90018890	0.0212	483078	0.2213	8.33539e-06	0.317334	1331	Brain_age_gap	TRUE	0.0147231	3.08966e-06	TRUE	1.22201e-05
rs7558967	2	174111412	T	C	T	C	-2.24042	0.0016	0.09316	0.242823	FALSE	FALSE	FALSE	ebi-a-GCST90018890	0.0181	483078	0.9303	2.05553e-06	0.471878	1331	Brain_age_gap	TRUE	0.016679	1.61759e-08	TRUE	2.33923e-06
rs78364213	8	112683091	A	G	A	G	2.31826	0.0065	0.07325	0.0531849	FALSE	FALSE	FALSE	ebi-a-GCST90018890	0.0351	483078	0.8527	8.3057e-06	0.520121	1331	Brain_age_gap	TRUE	0.0147281	7.099e-08	TRUE	9.48236e-06
rs985145	6	40380712	T	C	T	C	-1.30693	-0.0019	0.3107	0.30729	FALSE	FALSE	FALSE	ebi-a-GCST90018890	0.0154	483078	0.9021	7.60901e-06	0.291994	1331	Brain_age_gap	TRUE	0.0148504	3.15101e-08	TRUE	8.56831e-06
rs9878089	3	7965744	G	A	G	A	-1.26464	0.0005	0.4621	0.474374	FALSE	FALSE	FALSE	ebi-a-GCST90018890	0.0141	483078	0.9738	3.67853e-06	0.273213	1331	Brain_age_gap	TRUE	0.0158657	2.60307e-09	TRUE	4.09516e-06
rs16863620	3	188536690	A	G	A	G	-1.57222	0.00540867	0.1882	0.169	FALSE	FALSE	FALSE	ebi-a-GCST90026412	0.098275	3196	0.956107	8.14224e-06	0.352405	1331	Brain_age_gap	TRUE	0.0147558	9.4833e-07	TRUE	0.000208237
rs1999999	1	240714262	T	G	T	G	-1.82443	0.00377401	0.1405	0.132	FALSE	FALSE	FALSE	ebi-a-GCST90026412	0.11484	3196	0.973789	6.69697e-06	0.40515	1331	Brain_age_gap	TRUE	0.0150287	3.38131e-07	TRUE	0.000172938
rs35633	16	23704005	T	C	T	C	1.43766	0.0432041	0.2213	0.201	FALSE	FALSE	FALSE	ebi-a-GCST90026412	0.0910879	3196	0.635281	9.87947e-06	0.325278	1331	Brain_age_gap	TRUE	0.0144858	7.04309e-05	TRUE	0.000567048
rs4365591	3	72021775	C	T	C	T	-2.15224	0.0458907	0.08565	0.079	FALSE	FALSE	FALSE	ebi-a-GCST90026412	0.134036	3196	0.732067	9.22206e-06	0.485322	1331	Brain_age_gap	TRUE	0.0145819	3.66991e-05	TRUE	0.000414321
rs7110255	11	4784113	A	C	A	C	1.41416	-0.0517148	0.2412	0.232	FALSE	FALSE	FALSE	ebi-a-GCST90026412	0.0865317	3196	0.550081	8.33539e-06	0.317334	1331	Brain_age_gap	TRUE	0.0147231	0.000111814	TRUE	0.000648226
rs7558967	2	174111412	T	C	T	C	-2.24042	0.101808	0.09316	0.094	FALSE	FALSE	FALSE	ebi-a-GCST90026412	0.126765	3196	0.421905	2.05553e-06	0.471878	1331	Brain_age_gap	TRUE	0.016679	0.000201903	TRUE	0.000396799
rs78364213	8	112683091	A	G	A	G	2.31826	0.0925909	0.07325	0.079	FALSE	FALSE	FALSE	ebi-a-GCST90026412	0.133324	3196	0.487381	8.3057e-06	0.520121	1331	Brain_age_gap	TRUE	0.0147281	0.00015098	TRUE	0.000782947
rs985145	6	40380712	T	C	T	C	-1.30693	0.0672966	0.3107	0.34	FALSE	FALSE	FALSE	ebi-a-GCST90026412	0.0763857	3196	0.378313	7.60901e-06	0.291994	1331	Brain_age_gap	TRUE	0.0148504	0.000242953	TRUE	0.00106292
rs9878089	3	7965744	G	A	G	A	-1.26464	0.00870192	0.4621	0.455	FALSE	FALSE	FALSE	ebi-a-GCST90026412	0.0727352	3196	0.904779	3.67853e-06	0.273213	1331	Brain_age_gap	TRUE	0.0158657	4.4813e-06	TRUE	0.000137117
rs16863620	3	188536690	A	G	A	G	-1.57222	0.0307897	0.1882	0.171	FALSE	FALSE	FALSE	ebi-a-GCST90026413	0.0690703	3937	0.655766	8.14224e-06	0.352405	1331	Brain_age_gap	TRUE	0.0147558	5.04965e-05	TRUE	0.000291606
rs182456433	14	74307398	T	C	T	C	2.85993	0.0851569	0.05409	0.051	FALSE	FALSE	FALSE	ebi-a-GCST90026413	0.11678	3937	0.465875	2.83971e-06	0.610825	1331	Brain_age_gap	TRUE	0.0162274	0.000135114	TRUE	0.000242993
rs1999999	1	240714262	T	G	T	G	-1.82443	-0.110065	0.1405	0.127	FALSE	FALSE	FALSE	ebi-a-GCST90026413	0.0827642	3937	0.183562	6.69697e-06	0.40515	1331	Brain_age_gap	TRUE	0.0150287	0.000449235	TRUE	0.00130729
rs35633	16	23704005	T	C	T	C	1.43766	-0.0307407	0.2213	0.198	FALSE	FALSE	FALSE	ebi-a-GCST90026413	0.0647041	3937	0.63472	9.87947e-06	0.325278	1331	Brain_age_gap	TRUE	0.0144858	5.7358e-05	TRUE	0.00035398
rs4365591	3	72021775	C	T	C	T	-2.15224	0.0796359	0.08565	0.08	FALSE	FALSE	FALSE	ebi-a-GCST90026413	0.0948648	3937	0.401207	9.22206e-06	0.485322	1331	Brain_age_gap	TRUE	0.0145819	0.000179054	TRUE	0.000669082
rs7110255	11	4784113	A	C	A	C	1.41416	-0.141976	0.2412	0.228	FALSE	FALSE	FALSE	ebi-a-GCST90026413	0.0615531	3937	0.021079	8.33539e-06	0.317334	1331	Brain_age_gap	TRUE	0.0147231	0.0013502	TRUE	0.00727674
rs7558967	2	174111412	T	C	T	C	-2.24042	0.123488	0.09316	0.096	FALSE	FALSE	FALSE	ebi-a-GCST90026413	0.0883599	3937	0.162245	2.05553e-06	0.471878	1331	Brain_age_gap	TRUE	0.016679	0.000496111	TRUE	0.000698234
rs78364213	8	112683091	A	G	A	G	2.31826	-0.121102	0.07325	0.076	FALSE	FALSE	FALSE	ebi-a-GCST90026413	0.0960881	3937	0.207555	8.3057e-06	0.520121	1331	Brain_age_gap	TRUE	0.0147281	0.0004035	TRUE	0.00132792
rs985145	6	40380712	T	C	T	C	-1.30693	-0.0461082	0.3107	0.336	FALSE	FALSE	FALSE	ebi-a-GCST90026413	0.0542868	3937	0.39569	7.60901e-06	0.291994	1331	Brain_age_gap	TRUE	0.0148504	0.000183292	TRUE	0.000598328
rs9878089	3	7965744	G	A	G	A	-1.26464	0.0426419	0.4621	0.456	FALSE	FALSE	FALSE	ebi-a-GCST90026413	0.0518972	3937	0.411271	3.67853e-06	0.273213	1331	Brain_age_gap	TRUE	0.0158657	0.00017154	TRUE	0.000347052
rs16863620	3	188536690	A	G	A	G	-1.57222	0.0429353	0.1882	0.171	FALSE	FALSE	FALSE	ebi-a-GCST90026414	0.0690144	3874	0.53386	8.14224e-06	0.352405	1331	Brain_age_gap	TRUE	0.0147558	9.99472e-05	TRUE	0.000424595
rs182456433	14	74307398	T	C	T	C	2.85993	0.0495976	0.05409	0.051	FALSE	FALSE	FALSE	ebi-a-GCST90026414	0.119033	3874	0.676916	2.83971e-06	0.610825	1331	Brain_age_gap	TRUE	0.0162274	4.48365e-05	TRUE	0.00013509
rs1999999	1	240714262	T	G	T	G	-1.82443	0.0136926	0.1405	0.131	FALSE	FALSE	FALSE	ebi-a-GCST90026414	0.0824448	3874	0.868089	6.69697e-06	0.40515	1331	Brain_age_gap	TRUE	0.0150287	7.12372e-06	TRUE	0.000150377
rs35633	16	23704005	T	C	T	C	1.43766	0.0953423	0.2213	0.204	FALSE	FALSE	FALSE	ebi-a-GCST90026414	0.0637785	3874	0.134943	9.87947e-06	0.325278	1331	Brain_age_gap	TRUE	0.0144858	0.000576815	TRUE	0.00230606
rs4365591	3	72021775	C	T	C	T	-2.15224	-0.0522525	0.08565	0.078	FALSE	FALSE	FALSE	ebi-a-GCST90026414	0.0964986	3874	0.588174	9.22206e-06	0.485322	1331	Brain_age_gap	TRUE	0.0145819	7.57188e-05	TRUE	0.00039689
rs7110255	11	4784113	A	C	A	C	1.41416	-0.0991721	0.2412	0.229	FALSE	FALSE	FALSE	ebi-a-GCST90026414	0.0608413	3874	0.103093	8.33539e-06	0.317334	1331	Brain_age_gap	TRUE	0.0147231	0.000685723	TRUE	0.00260592
rs7558967	2	174111412	T	C	T	C	-2.24042	0.0819143	0.09316	0.094	FALSE	FALSE	FALSE	ebi-a-GCST90026414	0.0895422	3874	0.36029	2.05553e-06	0.471878	1331	Brain_age_gap	TRUE	0.016679	0.00021609	TRUE	0.000292829
rs78364213	8	112683091	A	G	A	G	2.31826	-0.0672597	0.07325	0.076	FALSE	FALSE	FALSE	ebi-a-GCST90026414	0.0965821	3874	0.48618	8.3057e-06	0.520121	1331	Brain_age_gap	TRUE	0.0147281	0.000125235	TRUE	0.000495599
rs985145	6	40380712	T	C	T	C	-1.30693	0.0293507	0.3107	0.339	FALSE	FALSE	FALSE	ebi-a-GCST90026414	0.0540107	3874	0.586839	7.60901e-06	0.291994	1331	Brain_age_gap	TRUE	0.0148504	7.62621e-05	TRUE	0.000348254
rs9878089	3	7965744	G	A	G	A	-1.26464	0.0664032	0.4621	0.457	FALSE	FALSE	FALSE	ebi-a-GCST90026414	0.0522501	3874	0.203775	3.67853e-06	0.273213	1331	Brain_age_gap	TRUE	0.0158657	0.000416953	TRUE	0.000838538
rs10490016	2	234875139	C	T	C	T	-2.81082	0.323629	0.05297	0.051	FALSE	FALSE	FALSE	ebi-a-GCST90026415	0.115632	4118	0.00512944	3.88386e-06	0.608733	1331	Brain_age_gap	TRUE	0.0157898	0.00189949	TRUE	0.00877046
rs16863620	3	188536690	A	G	A	G	-1.57222	-0.0236175	0.1882	0.168	FALSE	FALSE	FALSE	ebi-a-GCST90026415	0.0654177	4118	0.71808	8.14224e-06	0.352405	1331	Brain_age_gap	TRUE	0.0147558	3.16656e-05	TRUE	0.000224446
rs182456433	14	74307398	T	C	T	C	2.85993	0.0510819	0.05409	0.052	FALSE	FALSE	FALSE	ebi-a-GCST90026415	0.110938	4118	0.645191	2.83971e-06	0.610825	1331	Brain_age_gap	TRUE	0.0162274	5.15081e-05	TRUE	0.000127629
rs1999999	1	240714262	T	G	T	G	-1.82443	0.048389	0.1405	0.133	FALSE	FALSE	FALSE	ebi-a-GCST90026415	0.076234	4118	0.5256	6.69697e-06	0.40515	1331	Brain_age_gap	TRUE	0.0150287	9.78764e-05	TRUE	0.000329961
rs35633	16	23704005	T	C	T	C	1.43766	0.0168365	0.2213	0.201	FALSE	FALSE	FALSE	ebi-a-GCST90026415	0.060585	4118	0.781097	9.87947e-06	0.325278	1331	Brain_age_gap	TRUE	0.0144858	1.87625e-05	TRUE	0.000219945
rs4365591	3	72021775	C	T	C	T	-2.15224	0.0407368	0.08565	0.08	FALSE	FALSE	FALSE	ebi-a-GCST90026415	0.0891527	4118	0.647718	9.22206e-06	0.485322	1331	Brain_age_gap	TRUE	0.0145819	5.07233e-05	TRUE	0.000295365
rs7110255	11	4784113	A	C	A	C	1.41416	-0.0438406	0.2412	0.236	FALSE	FALSE	FALSE	ebi-a-GCST90026415	0.0568797	4118	0.440857	8.33539e-06	0.317334	1331	Brain_age_gap	TRUE	0.0147231	0.000144311	TRUE	0.000495658
rs7558967	2	174111412	T	C	T	C	-2.24042	0.0842244	0.09316	0.096	FALSE	FALSE	FALSE	ebi-a-GCST90026415	0.0828967	4118	0.309621	2.05553e-06	0.471878	1331	Brain_age_gap	TRUE	0.016679	0.000250736	TRUE	0.000302273
rs78364213	8	112683091	A	G	A	G	2.31826	0.0173832	0.07325	0.078	FALSE	FALSE	FALSE	ebi-a-GCST90026415	0.0895834	4118	0.846141	8.3057e-06	0.520121	1331	Brain_age_gap	TRUE	0.0147281	9.14798e-06	TRUE	0.000164182
rs985145	6	40380712	T	C	T	C	-1.30693	-0.081982	0.3107	0.331	FALSE	FALSE	FALSE	ebi-a-GCST90026415	0.0519844	4118	0.114784	7.60901e-06	0.291994	1331	Brain_age_gap	TRUE	0.0148504	0.000603884	TRUE	0.00192359
rs9878089	3	7965744	G	A	G	A	-1.26464	-0.0167062	0.4621	0.454	FALSE	FALSE	FALSE	ebi-a-GCST90026415	0.0488012	4118	0.732099	3.67853e-06	0.273213	1331	Brain_age_gap	TRUE	0.0158657	2.84713e-05	TRUE	0.000121363
rs16863620	3	188536690	A	G	A	G	-1.57222	-0.0281613	0.1882	0.167	FALSE	FALSE	FALSE	ebi-a-GCST90026416	0.0529643	5605	0.594934	8.14224e-06	0.352405	1331	Brain_age_gap	TRUE	0.0147558	5.04541e-05	TRUE	0.000165195
rs182456433	14	74307398	T	C	T	C	2.85993	0.00153646	0.05409	0.05	FALSE	FALSE	FALSE	ebi-a-GCST90026416	0.0892858	5605	0.98627	2.83971e-06	0.610825	1331	Brain_age_gap	TRUE	0.0162274	5.28515e-08	TRUE	2.80146e-05
rs1999999	1	240714262	T	G	T	G	-1.82443	0.100419	0.1405	0.135	FALSE	FALSE	FALSE	ebi-a-GCST90026416	0.0614813	5605	0.102402	6.69697e-06	0.40515	1331	Brain_age_gap	TRUE	0.0150287	0.000475903	TRUE	0.000893477
rs35633	16	23704005	T	C	T	C	1.43766	-0.063029	0.2213	0.195	FALSE	FALSE	FALSE	ebi-a-GCST90026416	0.0493055	5605	0.201135	9.87947e-06	0.325278	1331	Brain_age_gap	TRUE	0.0144858	0.00029157	TRUE	0.000666201
rs4365591	3	72021775	C	T	C	T	-2.15224	-0.00224893	0.08565	0.079	FALSE	FALSE	FALSE	ebi-a-GCST90026416	0.0724724	5605	0.975244	9.22206e-06	0.485322	1331	Brain_age_gap	TRUE	0.0145819	1.71864e-07	TRUE	7.42249e-05
rs7110255	11	4784113	A	C	A	C	1.41416	-0.101286	0.2412	0.225	FALSE	FALSE	FALSE	ebi-a-GCST90026416	0.0466502	5605	0.0299178	8.33539e-06	0.317334	1331	Brain_age_gap	TRUE	0.0147231	0.000840632	TRUE	0.00232634
rs7558967	2	174111412	T	C	T	C	-2.24042	0.0654654	0.09316	0.095	FALSE	FALSE	FALSE	ebi-a-GCST90026416	0.067108	5605	0.329299	2.05553e-06	0.471878	1331	Brain_age_gap	TRUE	0.016679	0.000169817	TRUE	0.000129071
rs78364213	8	112683091	A	G	A	G	2.31826	-0.0128776	0.07325	0.078	FALSE	FALSE	FALSE	ebi-a-GCST90026416	0.0731335	5605	0.860227	8.3057e-06	0.520121	1331	Brain_age_gap	TRUE	0.0147281	5.53368e-06	TRUE	8.89548e-05
rs985145	6	40380712	T	C	T	C	-1.30693	-0.0370264	0.3107	0.333	FALSE	FALSE	FALSE	ebi-a-GCST90026416	0.0416537	5605	0.374049	7.60901e-06	0.291994	1331	Brain_age_gap	TRUE	0.0148504	0.000141005	TRUE	0.00029051
rs9878089	3	7965744	G	A	G	A	-1.26464	0.0212923	0.4621	0.455	FALSE	FALSE	FALSE	ebi-a-GCST90026416	0.0395635	5605	0.590465	3.67853e-06	0.273213	1331	Brain_age_gap	TRUE	0.0158657	5.16907e-05	TRUE	9.09826e-05
rs10490016	2	234875139	C	T	C	T	-2.81082	-0.0021188	0.05297	0.054418	FALSE	FALSE	FALSE	ebi-a-GCST90029019	0.00201993	477807	0.21	3.88386e-06	0.608733	1331	Brain_age_gap	TRUE	0.0157898	2.3028e-06	TRUE	5.57485e-06
rs16863620	3	188536690	A	G	A	G	-1.57222	0.000141151	0.1882	0.178521	FALSE	FALSE	FALSE	ebi-a-GCST90029019	0.00119073	477807	0.89	8.14224e-06	0.352405	1331	Brain_age_gap	TRUE	0.0147558	2.94097e-08	TRUE	9.15342e-06
rs17178441	6	29708466	T	C	T	C	-2.68141	0.00383087	0.05334	0.03787	FALSE	FALSE	FALSE	ebi-a-GCST90029019	0.0029297	477807	0.17	8.57525e-06	0.602524	1331	Brain_age_gap	TRUE	0.0146835	3.57846e-06	TRUE	1.28497e-05
rs182456433	14	74307398	T	C	T	C	2.85993	0.00242743	0.05409	0.05293	FALSE	FALSE	FALSE	ebi-a-GCST90029019	0.00205578	477807	0.27	2.83971e-06	0.610825	1331	Brain_age_gap	TRUE	0.0162274	2.91802e-06	TRUE	4.247e-06
rs1999999	1	240714262	T	G	T	G	-1.82443	0.000100077	0.1405	0.137537	FALSE	FALSE	FALSE	ebi-a-GCST90029019	0.0013466	477807	0.92	6.69697e-06	0.40515	1331	Brain_age_gap	TRUE	0.0150287	1.15595e-08	TRUE	7.46794e-06
rs35633	16	23704005	T	C	T	C	1.43766	-0.000293647	0.2213	0.209436	FALSE	FALSE	FALSE	ebi-a-GCST90029019	0.00112277	477807	0.83	9.87947e-06	0.325278	1331	Brain_age_gap	TRUE	0.0144858	1.43159e-07	TRUE	1.14662e-05
rs4365591	3	72021775	C	T	C	T	-2.15224	-0.00105382	0.08565	0.096495	FALSE	FALSE	FALSE	ebi-a-GCST90029019	0.00154535	477807	0.5	9.22206e-06	0.485322	1331	Brain_age_gap	TRUE	0.0145819	9.73258e-07	TRUE	1.1863e-05
rs7110255	11	4784113	A	C	A	C	1.41416	0.000433461	0.2412	0.253895	FALSE	FALSE	FALSE	ebi-a-GCST90029019	0.00104881	477807	0.67	8.33539e-06	0.317334	1331	Brain_age_gap	TRUE	0.0147231	3.57483e-07	TRUE	1.00653e-05
rs7558967	2	174111412	T	C	T	C	-2.24042	0.000502491	0.09316	0.101365	FALSE	FALSE	FALSE	ebi-a-GCST90029019	0.00150726	477807	0.64	2.05553e-06	0.471878	1331	Brain_age_gap	TRUE	0.016679	2.32611e-07	TRUE	2.49339e-06
rs78364213	8	112683091	A	G	A	G	2.31826	-0.00104553	0.07325	0.074023	FALSE	FALSE	FALSE	ebi-a-GCST90029019	0.00174011	477807	0.46	8.3057e-06	0.520121	1331	Brain_age_gap	TRUE	0.0147281	7.55559e-07	TRUE	1.04982e-05
rs985145	6	40380712	T	C	T	C	-1.30693	-0.001727	0.3107	0.332439	FALSE	FALSE	FALSE	ebi-a-GCST90029019	0.000971109	477807	0.0669993	7.60901e-06	0.291994	1331	Brain_age_gap	TRUE	0.0148504	6.61904e-06	TRUE	1.28153e-05
rs9878089	3	7965744	G	A	G	A	-1.26464	-0.00076997	0.4621	0.435113	FALSE	FALSE	FALSE	ebi-a-GCST90029019	0.000918486	477807	0.49	3.67853e-06	0.273213	1331	Brain_age_gap	TRUE	0.0158657	1.47079e-06	TRUE	5.0153e-06
rs10490016	2	234875139	C	T	C	T	-2.81082	0.0873696	0.05297	0.0548006	FALSE	FALSE	FALSE	ebi-a-GCST90054782	0.0436391	377988	0.056443	3.88386e-06	0.608733	1331	Brain_age_gap	TRUE	0.0157898	1.06045e-05	TRUE	7.57054e-06
rs16863620	3	188536690	A	G	A	G	-1.57222	0.0193712	0.1882	0.176574	FALSE	FALSE	FALSE	ebi-a-GCST90054782	0.0268821	377988	0.503614	8.14224e-06	0.352405	1331	Brain_age_gap	TRUE	0.0147558	1.37376e-06	TRUE	1.09132e-05
rs17178441	6	29708466	T	C	T	C	-2.68141	-0.0472908	0.05334	0.0377856	FALSE	FALSE	FALSE	ebi-a-GCST90054782	0.0552557	377988	0.37957	8.57525e-06	0.602524	1331	Brain_age_gap	TRUE	0.0146835	1.93786e-06	TRUE	1.191e-05
rs182456433	14	74307398	T	C	T	C	2.85993	0.0494566	0.05409	0.0519962	FALSE	FALSE	FALSE	ebi-a-GCST90054782	0.0454615	377988	0.288198	2.83971e-06	0.610825	1331	Brain_age_gap	TRUE	0.0162274	3.13101e-06	TRUE	4.32742e-06
rs1999999	1	240714262	T	G	T	G	-1.82443	0.00848391	0.1405	0.137486	FALSE	FALSE	FALSE	ebi-a-GCST90054782	0.0298573	377988	0.747618	6.69697e-06	0.40515	1331	Brain_age_gap	TRUE	0.0150287	2.13607e-07	TRUE	7.99359e-06
rs35633	16	23704005	T	C	T	C	1.43766	0.0176041	0.2213	0.209355	FALSE	FALSE	FALSE	ebi-a-GCST90054782	0.0252232	377988	0.650636	9.87947e-06	0.325278	1331	Brain_age_gap	TRUE	0.0144858	1.2887e-06	TRUE	1.3104e-05
rs4365591	3	72021775	C	T	C	T	-2.15224	0.0520515	0.08565	0.0960485	FALSE	FALSE	FALSE	ebi-a-GCST90054782	0.0342933	377988	0.128464	9.22206e-06	0.485322	1331	Brain_age_gap	TRUE	0.0145819	6.09494e-06	TRUE	1.52832e-05
rs7110255	11	4784113	A	C	A	C	1.41416	0.0766091	0.2412	0.250187	FALSE	FALSE	FALSE	ebi-a-GCST90054782	0.0233825	377988	0.00128103	8.33539e-06	0.317334	1331	Brain_age_gap	TRUE	0.0147231	2.83982e-05	TRUE	2.21496e-05
rs7558967	2	174111412	T	C	T	C	-2.24042	0.036573	0.09316	0.0986097	FALSE	FALSE	FALSE	ebi-a-GCST90054782	0.0341024	377988	0.407765	2.05553e-06	0.471878	1331	Brain_age_gap	TRUE	0.016679	3.04281e-06	TRUE	3.14622e-06
rs78364213	8	112683091	A	G	A	G	2.31826	0.0785246	0.07325	0.0739088	FALSE	FALSE	FALSE	ebi-a-GCST90054782	0.0381662	377988	0.0378399	8.3057e-06	0.520121	1331	Brain_age_gap	TRUE	0.0147281	1.11988e-05	TRUE	1.5966e-05
rs985145	6	40380712	T	C	T	C	-1.30693	-0.042475	0.3107	0.667829	FALSE	FALSE	FALSE	ebi-a-GCST90054782	0.0220538	377988	0.0723802	7.60901e-06	0.291994	1331	Brain_age_gap	TRUE	0.0148504	9.81341e-06	TRUE	1.4166e-05
rs9878089	3	7965744	G	A	G	A	-1.26464	-0.0215364	0.4621	0.567092	FALSE	FALSE	FALSE	ebi-a-GCST90054782	0.0208449	377988	0.297	3.67853e-06	0.273213	1331	Brain_age_gap	TRUE	0.0158657	2.82403e-06	TRUE	5.48148e-06
rs10490016	2	234875139	C	T	C	T	-2.81082	-0.2921	0.05297	0.02368	FALSE	FALSE	FALSE	finn-b-CHIRHEP_NAS	0.2184		0.1811	3.88386e-06	0.608733	1331	Brain_age_gap		0.0157898
rs16863620	3	188536690	A	G	A	G	-1.57222	-0.0188	0.1882	0.246	FALSE	FALSE	FALSE	finn-b-CHIRHEP_NAS	0.0761		0.8051	8.14224e-06	0.352405	1331	Brain_age_gap		0.0147558
rs17178441	6	29708466	T	C	T	C	-2.68141	0.006	0.05334	0.05532	FALSE	FALSE	FALSE	finn-b-CHIRHEP_NAS	0.1446		0.9671	8.57525e-06	0.602524	1331	Brain_age_gap		0.0146835
rs182456433	14	74307398	T	C	T	C	2.85993	0.1201	0.05409	0.07149	FALSE	FALSE	FALSE	finn-b-CHIRHEP_NAS	0.1268		0.3436	2.83971e-06	0.610825	1331	Brain_age_gap		0.0162274
rs1999999	1	240714262	T	G	T	G	-1.82443	0.0421	0.1405	0.1588	FALSE	FALSE	FALSE	finn-b-CHIRHEP_NAS	0.0901		0.64	6.69697e-06	0.40515	1331	Brain_age_gap		0.0150287
rs35633	16	23704005	T	C	T	C	1.43766	-0.0487	0.2213	0.2635	FALSE	FALSE	FALSE	finn-b-CHIRHEP_NAS	0.0741		0.5112	9.87947e-06	0.325278	1331	Brain_age_gap		0.0144858
rs4365591	3	72021775	C	T	C	T	-2.15224	-0.0618	0.08565	0.05506	FALSE	FALSE	FALSE	finn-b-CHIRHEP_NAS	0.1434		0.6664	9.22206e-06	0.485322	1331	Brain_age_gap		0.0145819
rs7110255	11	4784113	A	C	A	C	1.41416	0.1261	0.2412	0.1552	FALSE	FALSE	FALSE	finn-b-CHIRHEP_NAS	0.0906		0.1639	8.33539e-06	0.317334	1331	Brain_age_gap		0.0147231
rs7558967	2	174111412	T	C	T	C	-2.24042	0.0068	0.09316	0.1207	FALSE	FALSE	FALSE	finn-b-CHIRHEP_NAS	0.1007		0.9464	2.05553e-06	0.471878	1331	Brain_age_gap		0.016679
rs78364213	8	112683091	A	G	A	G	2.31826	0.0005	0.07325	0.04002	FALSE	FALSE	FALSE	finn-b-CHIRHEP_NAS	0.1693		0.9974	8.3057e-06	0.520121	1331	Brain_age_gap		0.0147281
rs985145	6	40380712	T	C	T	C	-1.30693	0.0425	0.3107	0.3141	FALSE	FALSE	FALSE	finn-b-CHIRHEP_NAS	0.0706		0.547	7.60901e-06	0.291994	1331	Brain_age_gap		0.0148504
rs9878089	3	7965744	G	A	G	A	-1.26464	0.0398	0.4621	0.4691	FALSE	FALSE	FALSE	finn-b-CHIRHEP_NAS	0.0654		0.5432	3.67853e-06	0.273213	1331	Brain_age_gap		0.0158657
rs10490016	2	234875139	C	T	C	T	-2.81082	0.042	0.05297	0.02369	FALSE	FALSE	FALSE	finn-b-E4_DIABETES	0.0326		0.1974	3.88386e-06	0.608733	1331	Brain_age_gap		0.0157898
rs16863620	3	188536690	A	G	A	G	-1.57222	0.0034	0.1882	0.246	FALSE	FALSE	FALSE	finn-b-E4_DIABETES	0.0114		0.7666	8.14224e-06	0.352405	1331	Brain_age_gap		0.0147558
rs17178441	6	29708466	T	C	T	C	-2.68141	-0.0033	0.05334	0.05536	FALSE	FALSE	FALSE	finn-b-E4_DIABETES	0.0214		0.8759	8.57525e-06	0.602524	1331	Brain_age_gap		0.0146835
rs182456433	14	74307398	T	C	T	C	2.85993	0.0033	0.05409	0.07152	FALSE	FALSE	FALSE	finn-b-E4_DIABETES	0.0191		0.862	2.83971e-06	0.610825	1331	Brain_age_gap		0.0162274
rs1999999	1	240714262	T	G	T	G	-1.82443	-0.0014	0.1405	0.1588	FALSE	FALSE	FALSE	finn-b-E4_DIABETES	0.0135		0.9182	6.69697e-06	0.40515	1331	Brain_age_gap		0.0150287
rs35633	16	23704005	T	C	T	C	1.43766	-0.0034	0.2213	0.2636	FALSE	FALSE	FALSE	finn-b-E4_DIABETES	0.0111		0.7583	9.87947e-06	0.325278	1331	Brain_age_gap		0.0144858
rs4365591	3	72021775	C	T	C	T	-2.15224	-0.0239	0.08565	0.05504	FALSE	FALSE	FALSE	finn-b-E4_DIABETES	0.0215		0.2657	9.22206e-06	0.485322	1331	Brain_age_gap		0.0145819
rs7110255	11	4784113	A	C	A	C	1.41416	-0.0243	0.2412	0.1551	FALSE	FALSE	FALSE	finn-b-E4_DIABETES	0.0136		0.0735106	8.33539e-06	0.317334	1331	Brain_age_gap		0.0147231
rs7558967	2	174111412	T	C	T	C	-2.24042	-0.0217	0.09316	0.1206	FALSE	FALSE	FALSE	finn-b-E4_DIABETES	0.0151		0.1502	2.05553e-06	0.471878	1331	Brain_age_gap		0.016679
rs78364213	8	112683091	A	G	A	G	2.31826	0.0013	0.07325	0.04001	FALSE	FALSE	FALSE	finn-b-E4_DIABETES	0.0251		0.9587	8.3057e-06	0.520121	1331	Brain_age_gap		0.0147281
rs985145	6	40380712	T	C	T	C	-1.30693	-0.0204	0.3107	0.3139	FALSE	FALSE	FALSE	finn-b-E4_DIABETES	0.0106		0.0543901	7.60901e-06	0.291994	1331	Brain_age_gap		0.0148504
rs9878089	3	7965744	G	A	G	A	-1.26464	0.0116	0.4621	0.4691	FALSE	FALSE	FALSE	finn-b-E4_DIABETES	0.0098		0.2356	3.67853e-06	0.273213	1331	Brain_age_gap		0.0158657
rs10490016	2	234875139	C	T	C	T	-2.81082	0.2347	0.05297	0.02366	FALSE	FALSE	FALSE	finn-b-E4_DM1_STRICT	0.0997		0.0185498	3.88386e-06	0.608733	1331	Brain_age_gap		0.0157898
rs16863620	3	188536690	A	G	A	G	-1.57222	-0.0037	0.1882	0.2459	FALSE	FALSE	FALSE	finn-b-E4_DM1_STRICT	0.0352		0.9171	8.14224e-06	0.352405	1331	Brain_age_gap		0.0147558
rs17178441	6	29708466	T	C	T	C	-2.68141	-0.1359	0.05334	0.05516	FALSE	FALSE	FALSE	finn-b-E4_DM1_STRICT	0.0656		0.0382701	8.57525e-06	0.602524	1331	Brain_age_gap		0.0146835
rs182456433	14	74307398	T	C	T	C	2.85993	0.0098	0.05409	0.07154	FALSE	FALSE	FALSE	finn-b-E4_DM1_STRICT	0.0587		0.8672	2.83971e-06	0.610825	1331	Brain_age_gap		0.0162274
rs1999999	1	240714262	T	G	T	G	-1.82443	0.0277	0.1405	0.159	FALSE	FALSE	FALSE	finn-b-E4_DM1_STRICT	0.0416		0.5058	6.69697e-06	0.40515	1331	Brain_age_gap		0.0150287
rs35633	16	23704005	T	C	T	C	1.43766	-0.0319	0.2213	0.2633	FALSE	FALSE	FALSE	finn-b-E4_DM1_STRICT	0.0346		0.3559	9.87947e-06	0.325278	1331	Brain_age_gap		0.0144858
rs4365591	3	72021775	C	T	C	T	-2.15224	-0.0048	0.08565	0.0552	FALSE	FALSE	FALSE	finn-b-E4_DM1_STRICT	0.0671		0.9427	9.22206e-06	0.485322	1331	Brain_age_gap		0.0145819
rs7110255	11	4784113	A	C	A	C	1.41416	0.0112	0.2412	0.1556	FALSE	FALSE	FALSE	finn-b-E4_DM1_STRICT	0.042		0.7899	8.33539e-06	0.317334	1331	Brain_age_gap		0.0147231
rs7558967	2	174111412	T	C	T	C	-2.24042	-0.0494	0.09316	0.1208	FALSE	FALSE	FALSE	finn-b-E4_DM1_STRICT	0.0468		0.2912	2.05553e-06	0.471878	1331	Brain_age_gap		0.016679
rs78364213	8	112683091	A	G	A	G	2.31826	0.1229	0.07325	0.04001	FALSE	FALSE	FALSE	finn-b-E4_DM1_STRICT	0.0786		0.1181	8.3057e-06	0.520121	1331	Brain_age_gap		0.0147281
rs985145	6	40380712	T	C	T	C	-1.30693	-0.0188	0.3107	0.3143	FALSE	FALSE	FALSE	finn-b-E4_DM1_STRICT	0.033		0.5683	7.60901e-06	0.291994	1331	Brain_age_gap		0.0148504
rs9878089	3	7965744	G	A	G	A	-1.26464	0.0069	0.4621	0.4687	FALSE	FALSE	FALSE	finn-b-E4_DM1_STRICT	0.0304		0.8197	3.67853e-06	0.273213	1331	Brain_age_gap		0.0158657
rs10490016	2	234875139	C	T	C	T	-2.81082	0.1779	0.05297	0.02359	FALSE	FALSE	FALSE	finn-b-E4_DM1COMA	0.1402		0.2046	3.88386e-06	0.608733	1331	Brain_age_gap		0.0157898
rs16863620	3	188536690	A	G	A	G	-1.57222	-0.0652	0.1882	0.2458	FALSE	FALSE	FALSE	finn-b-E4_DM1COMA	0.0487		0.1803	8.14224e-06	0.352405	1331	Brain_age_gap		0.0147558
rs17178441	6	29708466	T	C	T	C	-2.68141	-0.2018	0.05334	0.05511	FALSE	FALSE	FALSE	finn-b-E4_DM1COMA	0.0896		0.02427	8.57525e-06	0.602524	1331	Brain_age_gap		0.0146835
rs182456433	14	74307398	T	C	T	C	2.85993	0.0511	0.05409	0.07159	FALSE	FALSE	FALSE	finn-b-E4_DM1COMA	0.0807		0.5265	2.83971e-06	0.610825	1331	Brain_age_gap		0.0162274
rs1999999	1	240714262	T	G	T	G	-1.82443	0.0181	0.1405	0.1589	FALSE	FALSE	FALSE	finn-b-E4_DM1COMA	0.0573		0.752	6.69697e-06	0.40515	1331	Brain_age_gap		0.0150287
rs35633	16	23704005	T	C	T	C	1.43766	-0.0245	0.2213	0.2634	FALSE	FALSE	FALSE	finn-b-E4_DM1COMA	0.0475		0.6059	9.87947e-06	0.325278	1331	Brain_age_gap		0.0144858
rs4365591	3	72021775	C	T	C	T	-2.15224	-0.0912	0.08565	0.0552	FALSE	FALSE	FALSE	finn-b-E4_DM1COMA	0.0921		0.3221	9.22206e-06	0.485322	1331	Brain_age_gap		0.0145819
rs7110255	11	4784113	A	C	A	C	1.41416	0.0792	0.2412	0.1556	FALSE	FALSE	FALSE	finn-b-E4_DM1COMA	0.0579		0.171	8.33539e-06	0.317334	1331	Brain_age_gap		0.0147231
rs7558967	2	174111412	T	C	T	C	-2.24042	-0.1135	0.09316	0.1207	FALSE	FALSE	FALSE	finn-b-E4_DM1COMA	0.0646		0.0791498	2.05553e-06	0.471878	1331	Brain_age_gap		0.016679
rs78364213	8	112683091	A	G	A	G	2.31826	0.0265	0.07325	0.03997	FALSE	FALSE	FALSE	finn-b-E4_DM1COMA	0.1086		0.8074	8.3057e-06	0.520121	1331	Brain_age_gap		0.0147281
rs985145	6	40380712	T	C	T	C	-1.30693	-0.0074	0.3107	0.3144	FALSE	FALSE	FALSE	finn-b-E4_DM1COMA	0.0454		0.8697	7.60901e-06	0.291994	1331	Brain_age_gap		0.0148504
rs9878089	3	7965744	G	A	G	A	-1.26464	-0.0118	0.4621	0.4687	FALSE	FALSE	FALSE	finn-b-E4_DM1COMA	0.0418		0.7787	3.67853e-06	0.273213	1331	Brain_age_gap		0.0158657
rs10490016	2	234875139	C	T	C	T	-2.81082	0.0146	0.05297	0.02359	FALSE	FALSE	FALSE	finn-b-E4_DM2_STRICT	0.0361		0.686501	3.88386e-06	0.608733	1331	Brain_age_gap		0.0157898
rs16863620	3	188536690	A	G	A	G	-1.57222	0.0002	0.1882	0.2459	FALSE	FALSE	FALSE	finn-b-E4_DM2_STRICT	0.0126		0.9885	8.14224e-06	0.352405	1331	Brain_age_gap		0.0147558
rs17178441	6	29708466	T	C	T	C	-2.68141	0.0224	0.05334	0.05537	FALSE	FALSE	FALSE	finn-b-E4_DM2_STRICT	0.0237		0.3447	8.57525e-06	0.602524	1331	Brain_age_gap		0.0146835
rs182456433	14	74307398	T	C	T	C	2.85993	-0.0031	0.05409	0.07148	FALSE	FALSE	FALSE	finn-b-E4_DM2_STRICT	0.021		0.8811	2.83971e-06	0.610825	1331	Brain_age_gap		0.0162274
rs1999999	1	240714262	T	G	T	G	-1.82443	-0.0034	0.1405	0.1587	FALSE	FALSE	FALSE	finn-b-E4_DM2_STRICT	0.0149		0.8197	6.69697e-06	0.40515	1331	Brain_age_gap		0.0150287
rs35633	16	23704005	T	C	T	C	1.43766	-0.0007	0.2213	0.2637	FALSE	FALSE	FALSE	finn-b-E4_DM2_STRICT	0.0123		0.9527	9.87947e-06	0.325278	1331	Brain_age_gap		0.0144858
rs4365591	3	72021775	C	T	C	T	-2.15224	-0.0109	0.08565	0.05516	FALSE	FALSE	FALSE	finn-b-E4_DM2_STRICT	0.0237		0.646001	9.22206e-06	0.485322	1331	Brain_age_gap		0.0145819
rs7110255	11	4784113	A	C	A	C	1.41416	-0.0302	0.2412	0.1551	FALSE	FALSE	FALSE	finn-b-E4_DM2_STRICT	0.015		0.0438702	8.33539e-06	0.317334	1331	Brain_age_gap		0.0147231
rs7558967	2	174111412	T	C	T	C	-2.24042	-0.0128	0.09316	0.1207	FALSE	FALSE	FALSE	finn-b-E4_DM2_STRICT	0.0167		0.441	2.05553e-06	0.471878	1331	Brain_age_gap		0.016679
rs78364213	8	112683091	A	G	A	G	2.31826	0.0026	0.07325	0.04001	FALSE	FALSE	FALSE	finn-b-E4_DM2_STRICT	0.0276		0.9259	8.3057e-06	0.520121	1331	Brain_age_gap		0.0147281
rs985145	6	40380712	T	C	T	C	-1.30693	-0.0166	0.3107	0.3142	FALSE	FALSE	FALSE	finn-b-E4_DM2_STRICT	0.0117		0.1548	7.60901e-06	0.291994	1331	Brain_age_gap		0.0148504
rs9878089	3	7965744	G	A	G	A	-1.26464	0.0087	0.4621	0.4689	FALSE	FALSE	FALSE	finn-b-E4_DM2_STRICT	0.0108		0.4194	3.67853e-06	0.273213	1331	Brain_age_gap		0.0158657
rs10490016	2	234875139	C	T	C	T	-2.81082	0.125	0.05297	0.02363	FALSE	FALSE	FALSE	finn-b-E4_DM2COMA	0.1022		0.2211	3.88386e-06	0.608733	1331	Brain_age_gap		0.0157898
rs16863620	3	188536690	A	G	A	G	-1.57222	0.0362	0.1882	0.2459	FALSE	FALSE	FALSE	finn-b-E4_DM2COMA	0.037		0.3272	8.14224e-06	0.352405	1331	Brain_age_gap		0.0147558
rs17178441	6	29708466	T	C	T	C	-2.68141	-0.0699	0.05334	0.05513	FALSE	FALSE	FALSE	finn-b-E4_DM2COMA	0.0692		0.3128	8.57525e-06	0.602524	1331	Brain_age_gap		0.0146835
rs182456433	14	74307398	T	C	T	C	2.85993	-0.0045	0.05409	0.07154	FALSE	FALSE	FALSE	finn-b-E4_DM2COMA	0.0619		0.9416	2.83971e-06	0.610825	1331	Brain_age_gap		0.0162274
rs1999999	1	240714262	T	G	T	G	-1.82443	0.0856	0.1405	0.159	FALSE	FALSE	FALSE	finn-b-E4_DM2COMA	0.0439		0.0511505	6.69697e-06	0.40515	1331	Brain_age_gap		0.0150287
rs35633	16	23704005	T	C	T	C	1.43766	0.0688	0.2213	0.2636	FALSE	FALSE	FALSE	finn-b-E4_DM2COMA	0.036		0.05615	9.87947e-06	0.325278	1331	Brain_age_gap		0.0144858
rs4365591	3	72021775	C	T	C	T	-2.15224	-0.0777	0.08565	0.05518	FALSE	FALSE	FALSE	finn-b-E4_DM2COMA	0.0694		0.2626	9.22206e-06	0.485322	1331	Brain_age_gap		0.0145819
rs7110255	11	4784113	A	C	A	C	1.41416	-0.0204	0.2412	0.1556	FALSE	FALSE	FALSE	finn-b-E4_DM2COMA	0.0436		0.640301	8.33539e-06	0.317334	1331	Brain_age_gap		0.0147231
rs7558967	2	174111412	T	C	T	C	-2.24042	0.0351	0.09316	0.1208	FALSE	FALSE	FALSE	finn-b-E4_DM2COMA	0.049		0.4741	2.05553e-06	0.471878	1331	Brain_age_gap		0.016679
rs78364213	8	112683091	A	G	A	G	2.31826	-0.1054	0.07325	0.03995	FALSE	FALSE	FALSE	finn-b-E4_DM2COMA	0.0794		0.184	8.3057e-06	0.520121	1331	Brain_age_gap		0.0147281
rs985145	6	40380712	T	C	T	C	-1.30693	-0.0168	0.3107	0.3144	FALSE	FALSE	FALSE	finn-b-E4_DM2COMA	0.0342		0.623499	7.60901e-06	0.291994	1331	Brain_age_gap		0.0148504
rs9878089	3	7965744	G	A	G	A	-1.26464	0.0149	0.4621	0.4688	FALSE	FALSE	FALSE	finn-b-E4_DM2COMA	0.0318		0.639501	3.67853e-06	0.273213	1331	Brain_age_gap		0.0158657
rs10490016	2	234875139	C	T	C	T	-2.81082	0.0635	0.05297	0.02357	FALSE	FALSE	FALSE	finn-b-E4_DM2KETO	0.2573		0.805	3.88386e-06	0.608733	1331	Brain_age_gap		0.0157898
rs16863620	3	188536690	A	G	A	G	-1.57222	-0.0378	0.1882	0.2459	FALSE	FALSE	FALSE	finn-b-E4_DM2KETO	0.089		0.671001	8.14224e-06	0.352405	1331	Brain_age_gap		0.0147558
rs17178441	6	29708466	T	C	T	C	-2.68141	0.3892	0.05334	0.0552	FALSE	FALSE	FALSE	finn-b-E4_DM2KETO	0.1632		0.0171002	8.57525e-06	0.602524	1331	Brain_age_gap		0.0146835
rs182456433	14	74307398	T	C	T	C	2.85993	0.2212	0.05409	0.07159	FALSE	FALSE	FALSE	finn-b-E4_DM2KETO	0.1476		0.1338	2.83971e-06	0.610825	1331	Brain_age_gap		0.0162274
rs1999999	1	240714262	T	G	T	G	-1.82443	0.0168	0.1405	0.1589	FALSE	FALSE	FALSE	finn-b-E4_DM2KETO	0.1052		0.8735	6.69697e-06	0.40515	1331	Brain_age_gap		0.0150287
rs35633	16	23704005	T	C	T	C	1.43766	0.0942	0.2213	0.2635	FALSE	FALSE	FALSE	finn-b-E4_DM2KETO	0.0868		0.2778	9.87947e-06	0.325278	1331	Brain_age_gap		0.0144858
rs4365591	3	72021775	C	T	C	T	-2.15224	0.0807	0.08565	0.05523	FALSE	FALSE	FALSE	finn-b-E4_DM2KETO	0.1671		0.628901	9.22206e-06	0.485322	1331	Brain_age_gap		0.0145819
rs7110255	11	4784113	A	C	A	C	1.41416	-0.2247	0.2412	0.1555	FALSE	FALSE	FALSE	finn-b-E4_DM2KETO	0.1056		0.0334303	8.33539e-06	0.317334	1331	Brain_age_gap		0.0147231
rs7558967	2	174111412	T	C	T	C	-2.24042	-0.1762	0.09316	0.1208	FALSE	FALSE	FALSE	finn-b-E4_DM2KETO	0.1182		0.1359	2.05553e-06	0.471878	1331	Brain_age_gap		0.016679
rs78364213	8	112683091	A	G	A	G	2.31826	-0.0623	0.07325	0.03997	FALSE	FALSE	FALSE	finn-b-E4_DM2KETO	0.1946		0.7491	8.3057e-06	0.520121	1331	Brain_age_gap		0.0147281
rs985145	6	40380712	T	C	T	C	-1.30693	-0.1315	0.3107	0.3144	FALSE	FALSE	FALSE	finn-b-E4_DM2KETO	0.0823		0.1101	7.60901e-06	0.291994	1331	Brain_age_gap		0.0148504
rs9878089	3	7965744	G	A	G	A	-1.26464	-0.029	0.4621	0.4687	FALSE	FALSE	FALSE	finn-b-E4_DM2KETO	0.0764		0.7048	3.67853e-06	0.273213	1331	Brain_age_gap		0.0158657
rs10490016	2	234875139	C	T	C	T	-2.81082	0.0302	0.05297	0.02362	FALSE	FALSE	FALSE	finn-b-E4_DM2NASCOMP	0.0389		0.4386	3.88386e-06	0.608733	1331	Brain_age_gap		0.0157898
rs16863620	3	188536690	A	G	A	G	-1.57222	0.0117	0.1882	0.2461	FALSE	FALSE	FALSE	finn-b-E4_DM2NASCOMP	0.0136		0.3886	8.14224e-06	0.352405	1331	Brain_age_gap		0.0147558
rs17178441	6	29708466	T	C	T	C	-2.68141	0.0141	0.05334	0.0553	FALSE	FALSE	FALSE	finn-b-E4_DM2NASCOMP	0.0256		0.581599	8.57525e-06	0.602524	1331	Brain_age_gap		0.0146835
rs182456433	14	74307398	T	C	T	C	2.85993	-0.0125	0.05409	0.07141	FALSE	FALSE	FALSE	finn-b-E4_DM2NASCOMP	0.0228		0.5836	2.83971e-06	0.610825	1331	Brain_age_gap		0.0162274
rs1999999	1	240714262	T	G	T	G	-1.82443	0.0109	0.1405	0.1589	FALSE	FALSE	FALSE	finn-b-E4_DM2NASCOMP	0.0161		0.5007	6.69697e-06	0.40515	1331	Brain_age_gap		0.0150287
rs35633	16	23704005	T	C	T	C	1.43766	0.0031	0.2213	0.2637	FALSE	FALSE	FALSE	finn-b-E4_DM2NASCOMP	0.0132		0.8164	9.87947e-06	0.325278	1331	Brain_age_gap		0.0144858
rs4365591	3	72021775	C	T	C	T	-2.15224	-0.0115	0.08565	0.05517	FALSE	FALSE	FALSE	finn-b-E4_DM2NASCOMP	0.0256		0.6534	9.22206e-06	0.485322	1331	Brain_age_gap		0.0145819
rs7110255	11	4784113	A	C	A	C	1.41416	-0.0339	0.2412	0.1551	FALSE	FALSE	FALSE	finn-b-E4_DM2NASCOMP	0.0162		0.0360903	8.33539e-06	0.317334	1331	Brain_age_gap		0.0147231
rs7558967	2	174111412	T	C	T	C	-2.24042	-0.0167	0.09316	0.1207	FALSE	FALSE	FALSE	finn-b-E4_DM2NASCOMP	0.018		0.3528	2.05553e-06	0.471878	1331	Brain_age_gap		0.016679
rs78364213	8	112683091	A	G	A	G	2.31826	-0.0085	0.07325	0.03995	FALSE	FALSE	FALSE	finn-b-E4_DM2NASCOMP	0.0299		0.7768	8.3057e-06	0.520121	1331	Brain_age_gap		0.0147281
rs985145	6	40380712	T	C	T	C	-1.30693	-0.0187	0.3107	0.3142	FALSE	FALSE	FALSE	finn-b-E4_DM2NASCOMP	0.0126		0.1395	7.60901e-06	0.291994	1331	Brain_age_gap		0.0148504
rs9878089	3	7965744	G	A	G	A	-1.26464	0.0212	0.4621	0.4692	FALSE	FALSE	FALSE	finn-b-E4_DM2NASCOMP	0.0117		0.0696194	3.67853e-06	0.273213	1331	Brain_age_gap		0.0158657
rs10490016	2	234875139	C	T	C	T	-2.81082	-0.0159	0.05297	0.02359	FALSE	FALSE	FALSE	finn-b-E4_DM2NEU	0.1524		0.9171	3.88386e-06	0.608733	1331	Brain_age_gap		0.0157898
rs16863620	3	188536690	A	G	A	G	-1.57222	0.0079	0.1882	0.2459	FALSE	FALSE	FALSE	finn-b-E4_DM2NEU	0.0571		0.8898	8.14224e-06	0.352405	1331	Brain_age_gap		0.0147558
rs17178441	6	29708466	T	C	T	C	-2.68141	-0.0202	0.05334	0.05517	FALSE	FALSE	FALSE	finn-b-E4_DM2NEU	0.1046		0.8471	8.57525e-06	0.602524	1331	Brain_age_gap		0.0146835
rs182456433	14	74307398	T	C	T	C	2.85993	-0.1409	0.05409	0.0715	FALSE	FALSE	FALSE	finn-b-E4_DM2NEU	0.096		0.1422	2.83971e-06	0.610825	1331	Brain_age_gap		0.0162274
rs1999999	1	240714262	T	G	T	G	-1.82443	0.0457	0.1405	0.1589	FALSE	FALSE	FALSE	finn-b-E4_DM2NEU	0.0677		0.499501	6.69697e-06	0.40515	1331	Brain_age_gap		0.0150287
rs35633	16	23704005	T	C	T	C	1.43766	-0.0463	0.2213	0.2634	FALSE	FALSE	FALSE	finn-b-E4_DM2NEU	0.0555		0.4046	9.87947e-06	0.325278	1331	Brain_age_gap		0.0144858
rs4365591	3	72021775	C	T	C	T	-2.15224	0.0423	0.08565	0.05523	FALSE	FALSE	FALSE	finn-b-E4_DM2NEU	0.1064		0.691399	9.22206e-06	0.485322	1331	Brain_age_gap		0.0145819
rs7110255	11	4784113	A	C	A	C	1.41416	0.0341	0.2412	0.1556	FALSE	FALSE	FALSE	finn-b-E4_DM2NEU	0.0666		0.6083	8.33539e-06	0.317334	1331	Brain_age_gap		0.0147231
rs7558967	2	174111412	T	C	T	C	-2.24042	0.0323	0.09316	0.1208	FALSE	FALSE	FALSE	finn-b-E4_DM2NEU	0.0748		0.6663	2.05553e-06	0.471878	1331	Brain_age_gap		0.016679
rs78364213	8	112683091	A	G	A	G	2.31826	-0.1948	0.07325	0.03994	FALSE	FALSE	FALSE	finn-b-E4_DM2NEU	0.1217		0.1096	8.3057e-06	0.520121	1331	Brain_age_gap		0.0147281
rs985145	6	40380712	T	C	T	C	-1.30693	-0.0644	0.3107	0.3144	FALSE	FALSE	FALSE	finn-b-E4_DM2NEU	0.0524		0.2188	7.60901e-06	0.291994	1331	Brain_age_gap		0.0148504
rs9878089	3	7965744	G	A	G	A	-1.26464	-0.0189	0.4621	0.4687	FALSE	FALSE	FALSE	finn-b-E4_DM2NEU	0.0486		0.698101	3.67853e-06	0.273213	1331	Brain_age_gap		0.0158657
rs10490016	2	234875139	C	T	C	T	-2.81082	0.0024	0.05297	0.02359	FALSE	FALSE	FALSE	finn-b-E4_DM2NOCOMP	0.0467		0.9593	3.88386e-06	0.608733	1331	Brain_age_gap		0.0157898
rs16863620	3	188536690	A	G	A	G	-1.57222	0.02	0.1882	0.2461	FALSE	FALSE	FALSE	finn-b-E4_DM2NOCOMP	0.0164		0.2228	8.14224e-06	0.352405	1331	Brain_age_gap		0.0147558
rs17178441	6	29708466	T	C	T	C	-2.68141	-0.0154	0.05334	0.05517	FALSE	FALSE	FALSE	finn-b-E4_DM2NOCOMP	0.0308		0.6169	8.57525e-06	0.602524	1331	Brain_age_gap		0.0146835
rs182456433	14	74307398	T	C	T	C	2.85993	0.0018	0.05409	0.07151	FALSE	FALSE	FALSE	finn-b-E4_DM2NOCOMP	0.0274		0.948	2.83971e-06	0.610825	1331	Brain_age_gap		0.0162274
rs1999999	1	240714262	T	G	T	G	-1.82443	-0.01	0.1405	0.1587	FALSE	FALSE	FALSE	finn-b-E4_DM2NOCOMP	0.0194		0.6073	6.69697e-06	0.40515	1331	Brain_age_gap		0.0150287
rs35633	16	23704005	T	C	T	C	1.43766	0.0123	0.2213	0.2636	FALSE	FALSE	FALSE	finn-b-E4_DM2NOCOMP	0.0159		0.4399	9.87947e-06	0.325278	1331	Brain_age_gap		0.0144858
rs4365591	3	72021775	C	T	C	T	-2.15224	0.0172	0.08565	0.0553	FALSE	FALSE	FALSE	finn-b-E4_DM2NOCOMP	0.0306		0.574601	9.22206e-06	0.485322	1331	Brain_age_gap		0.0145819
rs7110255	11	4784113	A	C	A	C	1.41416	-0.0278	0.2412	0.1555	FALSE	FALSE	FALSE	finn-b-E4_DM2NOCOMP	0.0194		0.1518	8.33539e-06	0.317334	1331	Brain_age_gap		0.0147231
rs7558967	2	174111412	T	C	T	C	-2.24042	-0.0173	0.09316	0.1207	FALSE	FALSE	FALSE	finn-b-E4_DM2NOCOMP	0.0216		0.4255	2.05553e-06	0.471878	1331	Brain_age_gap		0.016679
rs78364213	8	112683091	A	G	A	G	2.31826	-0.0425	0.07325	0.03997	FALSE	FALSE	FALSE	finn-b-E4_DM2NOCOMP	0.0356		0.2325	8.3057e-06	0.520121	1331	Brain_age_gap		0.0147281
rs985145	6	40380712	T	C	T	C	-1.30693	-0.0251	0.3107	0.3142	FALSE	FALSE	FALSE	finn-b-E4_DM2NOCOMP	0.0152		0.0986393	7.60901e-06	0.291994	1331	Brain_age_gap		0.0148504
rs9878089	3	7965744	G	A	G	A	-1.26464	0.0153	0.4621	0.469	FALSE	FALSE	FALSE	finn-b-E4_DM2NOCOMP	0.0141		0.277	3.67853e-06	0.273213	1331	Brain_age_gap		0.0158657
rs10490016	2	234875139	C	T	C	T	-2.81082	0.073	0.05297	0.02361	FALSE	FALSE	FALSE	finn-b-E4_DM2OPTH	0.105		0.4871	3.88386e-06	0.608733	1331	Brain_age_gap		0.0157898
rs16863620	3	188536690	A	G	A	G	-1.57222	0.0222	0.1882	0.2459	FALSE	FALSE	FALSE	finn-b-E4_DM2OPTH	0.0381		0.5596	8.14224e-06	0.352405	1331	Brain_age_gap		0.0147558
rs17178441	6	29708466	T	C	T	C	-2.68141	0.0023	0.05334	0.05519	FALSE	FALSE	FALSE	finn-b-E4_DM2OPTH	0.0704		0.974	8.57525e-06	0.602524	1331	Brain_age_gap		0.0146835
rs182456433	14	74307398	T	C	T	C	2.85993	-0.0277	0.05409	0.07153	FALSE	FALSE	FALSE	finn-b-E4_DM2OPTH	0.0636		0.6631	2.83971e-06	0.610825	1331	Brain_age_gap		0.0162274
rs1999999	1	240714262	T	G	T	G	-1.82443	0.0189	0.1405	0.1588	FALSE	FALSE	FALSE	finn-b-E4_DM2OPTH	0.0453		0.676	6.69697e-06	0.40515	1331	Brain_age_gap		0.0150287
rs35633	16	23704005	T	C	T	C	1.43766	-0.0277	0.2213	0.2633	FALSE	FALSE	FALSE	finn-b-E4_DM2OPTH	0.0372		0.4554	9.87947e-06	0.325278	1331	Brain_age_gap		0.0144858
rs4365591	3	72021775	C	T	C	T	-2.15224	-0.0475	0.08565	0.05519	FALSE	FALSE	FALSE	finn-b-E4_DM2OPTH	0.0716		0.5068	9.22206e-06	0.485322	1331	Brain_age_gap		0.0145819
rs7110255	11	4784113	A	C	A	C	1.41416	0.045	0.2412	0.1557	FALSE	FALSE	FALSE	finn-b-E4_DM2OPTH	0.0449		0.3162	8.33539e-06	0.317334	1331	Brain_age_gap		0.0147231
rs7558967	2	174111412	T	C	T	C	-2.24042	-0.0169	0.09316	0.1208	FALSE	FALSE	FALSE	finn-b-E4_DM2OPTH	0.05		0.735401	2.05553e-06	0.471878	1331	Brain_age_gap		0.016679
rs78364213	8	112683091	A	G	A	G	2.31826	-0.0364	0.07325	0.03997	FALSE	FALSE	FALSE	finn-b-E4_DM2OPTH	0.082		0.6569	8.3057e-06	0.520121	1331	Brain_age_gap		0.0147281
rs985145	6	40380712	T	C	T	C	-1.30693	-0.0673	0.3107	0.3143	FALSE	FALSE	FALSE	finn-b-E4_DM2OPTH	0.0352		0.0560299	7.60901e-06	0.291994	1331	Brain_age_gap		0.0148504
rs9878089	3	7965744	G	A	G	A	-1.26464	0.0488	0.4621	0.4688	FALSE	FALSE	FALSE	finn-b-E4_DM2OPTH	0.0326		0.1347	3.67853e-06	0.273213	1331	Brain_age_gap		0.0158657
rs10490016	2	234875139	C	T	C	T	-2.81082	-0.2258	0.05297	0.02355	FALSE	FALSE	FALSE	finn-b-E4_DM2PERIPH	0.1467		0.1238	3.88386e-06	0.608733	1331	Brain_age_gap		0.0157898
rs16863620	3	188536690	A	G	A	G	-1.57222	0.0308	0.1882	0.2459	FALSE	FALSE	FALSE	finn-b-E4_DM2PERIPH	0.0531		0.5622	8.14224e-06	0.352405	1331	Brain_age_gap		0.0147558
rs17178441	6	29708466	T	C	T	C	-2.68141	-0.1107	0.05334	0.05513	FALSE	FALSE	FALSE	finn-b-E4_DM2PERIPH	0.0989		0.2631	8.57525e-06	0.602524	1331	Brain_age_gap		0.0146835
rs182456433	14	74307398	T	C	T	C	2.85993	-0.0357	0.05409	0.07154	FALSE	FALSE	FALSE	finn-b-E4_DM2PERIPH	0.0884		0.6864	2.83971e-06	0.610825	1331	Brain_age_gap		0.0162274
rs1999999	1	240714262	T	G	T	G	-1.82443	0.0866	0.1405	0.1589	FALSE	FALSE	FALSE	finn-b-E4_DM2PERIPH	0.0631		0.17	6.69697e-06	0.40515	1331	Brain_age_gap		0.0150287
rs35633	16	23704005	T	C	T	C	1.43766	0.0744	0.2213	0.2635	FALSE	FALSE	FALSE	finn-b-E4_DM2PERIPH	0.0515		0.1485	9.87947e-06	0.325278	1331	Brain_age_gap		0.0144858
rs4365591	3	72021775	C	T	C	T	-2.15224	0.1165	0.08565	0.05526	FALSE	FALSE	FALSE	finn-b-E4_DM2PERIPH	0.0989		0.239	9.22206e-06	0.485322	1331	Brain_age_gap		0.0145819
rs7110255	11	4784113	A	C	A	C	1.41416	-0.0359	0.2412	0.1556	FALSE	FALSE	FALSE	finn-b-E4_DM2PERIPH	0.0629		0.5686	8.33539e-06	0.317334	1331	Brain_age_gap		0.0147231
rs7558967	2	174111412	T	C	T	C	-2.24042	-0.113	0.09316	0.1208	FALSE	FALSE	FALSE	finn-b-E4_DM2PERIPH	0.07		0.1064	2.05553e-06	0.471878	1331	Brain_age_gap		0.016679
rs78364213	8	112683091	A	G	A	G	2.31826	-0.0389	0.07325	0.03996	FALSE	FALSE	FALSE	finn-b-E4_DM2PERIPH	0.116		0.7373	8.3057e-06	0.520121	1331	Brain_age_gap		0.0147281
rs985145	6	40380712	T	C	T	C	-1.30693	-0.071	0.3107	0.3144	FALSE	FALSE	FALSE	finn-b-E4_DM2PERIPH	0.049		0.147	7.60901e-06	0.291994	1331	Brain_age_gap		0.0148504
rs9878089	3	7965744	G	A	G	A	-1.26464	-0.0175	0.4621	0.4687	FALSE	FALSE	FALSE	finn-b-E4_DM2PERIPH	0.0455		0.7005	3.67853e-06	0.273213	1331	Brain_age_gap		0.0158657
rs10490016	2	234875139	C	T	C	T	-2.81082	-0.1841	0.05297	0.02354	FALSE	FALSE	FALSE	finn-b-E4_DM2REN	0.1362		0.1766	3.88386e-06	0.608733	1331	Brain_age_gap		0.0157898
rs16863620	3	188536690	A	G	A	G	-1.57222	0.0117	0.1882	0.2459	FALSE	FALSE	FALSE	finn-b-E4_DM2REN	0.0477		0.8071	8.14224e-06	0.352405	1331	Brain_age_gap		0.0147558
rs17178441	6	29708466	T	C	T	C	-2.68141	-0.1557	0.05334	0.05512	FALSE	FALSE	FALSE	finn-b-E4_DM2REN	0.0882		0.0773998	8.57525e-06	0.602524	1331	Brain_age_gap		0.0146835
rs182456433	14	74307398	T	C	T	C	2.85993	-0.0458	0.05409	0.07153	FALSE	FALSE	FALSE	finn-b-E4_DM2REN	0.0799		0.5668	2.83971e-06	0.610825	1331	Brain_age_gap		0.0162274
rs1999999	1	240714262	T	G	T	G	-1.82443	0.0384	0.1405	0.1589	FALSE	FALSE	FALSE	finn-b-E4_DM2REN	0.0567		0.4985	6.69697e-06	0.40515	1331	Brain_age_gap		0.0150287
rs35633	16	23704005	T	C	T	C	1.43766	0.066	0.2213	0.2635	FALSE	FALSE	FALSE	finn-b-E4_DM2REN	0.0464		0.1554	9.87947e-06	0.325278	1331	Brain_age_gap		0.0144858
rs4365591	3	72021775	C	T	C	T	-2.15224	0.1406	0.08565	0.05528	FALSE	FALSE	FALSE	finn-b-E4_DM2REN	0.0886		0.1125	9.22206e-06	0.485322	1331	Brain_age_gap		0.0145819
rs7110255	11	4784113	A	C	A	C	1.41416	-0.0037	0.2412	0.1556	FALSE	FALSE	FALSE	finn-b-E4_DM2REN	0.0563		0.9473	8.33539e-06	0.317334	1331	Brain_age_gap		0.0147231
rs7558967	2	174111412	T	C	T	C	-2.24042	-0.0153	0.09316	0.1208	FALSE	FALSE	FALSE	finn-b-E4_DM2REN	0.0631		0.8085	2.05553e-06	0.471878	1331	Brain_age_gap		0.016679
rs78364213	8	112683091	A	G	A	G	2.31826	-0.1794	0.07325	0.03993	FALSE	FALSE	FALSE	finn-b-E4_DM2REN	0.1031		0.0816902	8.3057e-06	0.520121	1331	Brain_age_gap		0.0147281
rs985145	6	40380712	T	C	T	C	-1.30693	-0.0966	0.3107	0.3143	FALSE	FALSE	FALSE	finn-b-E4_DM2REN	0.0441		0.02848	7.60901e-06	0.291994	1331	Brain_age_gap		0.0148504
rs9878089	3	7965744	G	A	G	A	-1.26464	0.0364	0.4621	0.4688	FALSE	FALSE	FALSE	finn-b-E4_DM2REN	0.0408		0.3718	3.67853e-06	0.273213	1331	Brain_age_gap		0.0158657
rs10490016	2	234875139	C	T	C	T	-2.81082	-0.0216	0.05297	0.02369	FALSE	FALSE	FALSE	finn-b-FG_CVD	0.0261		0.4077	3.88386e-06	0.608733	1331	Brain_age_gap		0.0157898
rs16863620	3	188536690	A	G	A	G	-1.57222	0.012	0.1882	0.246	FALSE	FALSE	FALSE	finn-b-FG_CVD	0.0091		0.1865	8.14224e-06	0.352405	1331	Brain_age_gap		0.0147558
rs17178441	6	29708466	T	C	T	C	-2.68141	0.0204	0.05334	0.05536	FALSE	FALSE	FALSE	finn-b-FG_CVD	0.0172		0.2349	8.57525e-06	0.602524	1331	Brain_age_gap		0.0146835
rs182456433	14	74307398	T	C	T	C	2.85993	-0.0199	0.05409	0.07152	FALSE	FALSE	FALSE	finn-b-FG_CVD	0.0152		0.191	2.83971e-06	0.610825	1331	Brain_age_gap		0.0162274
rs1999999	1	240714262	T	G	T	G	-1.82443	-0.0049	0.1405	0.1588	FALSE	FALSE	FALSE	finn-b-FG_CVD	0.0108		0.650401	6.69697e-06	0.40515	1331	Brain_age_gap		0.0150287
rs35633	16	23704005	T	C	T	C	1.43766	0.0153	0.2213	0.2636	FALSE	FALSE	FALSE	finn-b-FG_CVD	0.0089		0.0862899	9.87947e-06	0.325278	1331	Brain_age_gap		0.0144858
rs4365591	3	72021775	C	T	C	T	-2.15224	-0.0021	0.08565	0.05504	FALSE	FALSE	FALSE	finn-b-FG_CVD	0.0171		0.9008	9.22206e-06	0.485322	1331	Brain_age_gap		0.0145819
rs7110255	11	4784113	A	C	A	C	1.41416	-0.0083	0.2412	0.1551	FALSE	FALSE	FALSE	finn-b-FG_CVD	0.0108		0.4441	8.33539e-06	0.317334	1331	Brain_age_gap		0.0147231
rs7558967	2	174111412	T	C	T	C	-2.24042	-0.0054	0.09316	0.1206	FALSE	FALSE	FALSE	finn-b-FG_CVD	0.0121		0.656999	2.05553e-06	0.471878	1331	Brain_age_gap		0.016679
rs78364213	8	112683091	A	G	A	G	2.31826	0.0016	0.07325	0.04001	FALSE	FALSE	FALSE	finn-b-FG_CVD	0.02		0.9383	8.3057e-06	0.520121	1331	Brain_age_gap		0.0147281
rs985145	6	40380712	T	C	T	C	-1.30693	0.0002	0.3107	0.3139	FALSE	FALSE	FALSE	finn-b-FG_CVD	0.0085		0.9797	7.60901e-06	0.291994	1331	Brain_age_gap		0.0148504
rs9878089	3	7965744	G	A	G	A	-1.26464	-0.0164	0.4621	0.4691	FALSE	FALSE	FALSE	finn-b-FG_CVD	0.0078		0.0360396	3.67853e-06	0.273213	1331	Brain_age_gap		0.0158657
rs10490016	2	234875139	C	T	C	T	-2.81082	0.002	0.05297	0.02369	FALSE	FALSE	FALSE	finn-b-I9_CVD	0.0256		0.9373	3.88386e-06	0.608733	1331	Brain_age_gap		0.0157898
rs16863620	3	188536690	A	G	A	G	-1.57222	0.0051	0.1882	0.246	FALSE	FALSE	FALSE	finn-b-I9_CVD	0.009		0.5696	8.14224e-06	0.352405	1331	Brain_age_gap		0.0147558
rs17178441	6	29708466	T	C	T	C	-2.68141	0.0141	0.05334	0.05536	FALSE	FALSE	FALSE	finn-b-I9_CVD	0.0169		0.4034	8.57525e-06	0.602524	1331	Brain_age_gap		0.0146835
rs182456433	14	74307398	T	C	T	C	2.85993	-0.0239	0.05409	0.07152	FALSE	FALSE	FALSE	finn-b-I9_CVD	0.015		0.1096	2.83971e-06	0.610825	1331	Brain_age_gap		0.0162274
rs1999999	1	240714262	T	G	T	G	-1.82443	0.0018	0.1405	0.1588	FALSE	FALSE	FALSE	finn-b-I9_CVD	0.0106		0.8649	6.69697e-06	0.40515	1331	Brain_age_gap		0.0150287
rs35633	16	23704005	T	C	T	C	1.43766	0.0096	0.2213	0.2636	FALSE	FALSE	FALSE	finn-b-I9_CVD	0.0088		0.2727	9.87947e-06	0.325278	1331	Brain_age_gap		0.0144858
rs4365591	3	72021775	C	T	C	T	-2.15224	-0.0115	0.08565	0.05504	FALSE	FALSE	FALSE	finn-b-I9_CVD	0.0169		0.4942	9.22206e-06	0.485322	1331	Brain_age_gap		0.0145819
rs7110255	11	4784113	A	C	A	C	1.41416	-0.0197	0.2412	0.1551	FALSE	FALSE	FALSE	finn-b-I9_CVD	0.0106		0.0639705	8.33539e-06	0.317334	1331	Brain_age_gap		0.0147231
rs7558967	2	174111412	T	C	T	C	-2.24042	-0.0089	0.09316	0.1206	FALSE	FALSE	FALSE	finn-b-I9_CVD	0.0119		0.4533	2.05553e-06	0.471878	1331	Brain_age_gap		0.016679
rs78364213	8	112683091	A	G	A	G	2.31826	-0.0149	0.07325	0.04001	FALSE	FALSE	FALSE	finn-b-I9_CVD	0.0197		0.4506	8.3057e-06	0.520121	1331	Brain_age_gap		0.0147281
rs985145	6	40380712	T	C	T	C	-1.30693	-0.0024	0.3107	0.3139	FALSE	FALSE	FALSE	finn-b-I9_CVD	0.0083		0.773599	7.60901e-06	0.291994	1331	Brain_age_gap		0.0148504
rs9878089	3	7965744	G	A	G	A	-1.26464	-0.0177	0.4621	0.4691	FALSE	FALSE	FALSE	finn-b-I9_CVD	0.0077		0.0217801	3.67853e-06	0.273213	1331	Brain_age_gap		0.0158657
rs10490016	2	234875139	C	T	C	T	-2.81082	-0.0542	0.05297	0.02369	FALSE	FALSE	FALSE	finn-b-I9_CVD_HARD	0.0361		0.1335	3.88386e-06	0.608733	1331	Brain_age_gap		0.0157898
rs16863620	3	188536690	A	G	A	G	-1.57222	0.016	0.1882	0.246	FALSE	FALSE	FALSE	finn-b-I9_CVD_HARD	0.0127		0.2092	8.14224e-06	0.352405	1331	Brain_age_gap		0.0147558
rs17178441	6	29708466	T	C	T	C	-2.68141	0.0385	0.05334	0.05536	FALSE	FALSE	FALSE	finn-b-I9_CVD_HARD	0.024		0.1085	8.57525e-06	0.602524	1331	Brain_age_gap		0.0146835
rs182456433	14	74307398	T	C	T	C	2.85993	-0.0429	0.05409	0.07152	FALSE	FALSE	FALSE	finn-b-I9_CVD_HARD	0.0213		0.04348	2.83971e-06	0.610825	1331	Brain_age_gap		0.0162274
rs1999999	1	240714262	T	G	T	G	-1.82443	-0.006	0.1405	0.1588	FALSE	FALSE	FALSE	finn-b-I9_CVD_HARD	0.0151		0.691399	6.69697e-06	0.40515	1331	Brain_age_gap		0.0150287
rs35633	16	23704005	T	C	T	C	1.43766	0.0037	0.2213	0.2636	FALSE	FALSE	FALSE	finn-b-I9_CVD_HARD	0.0124		0.7665	9.87947e-06	0.325278	1331	Brain_age_gap		0.0144858
rs4365591	3	72021775	C	T	C	T	-2.15224	0.0199	0.08565	0.05504	FALSE	FALSE	FALSE	finn-b-I9_CVD_HARD	0.0239		0.4056	9.22206e-06	0.485322	1331	Brain_age_gap		0.0145819
rs7110255	11	4784113	A	C	A	C	1.41416	-0.0089	0.2412	0.1551	FALSE	FALSE	FALSE	finn-b-I9_CVD_HARD	0.0151		0.5547	8.33539e-06	0.317334	1331	Brain_age_gap		0.0147231
rs7558967	2	174111412	T	C	T	C	-2.24042	-0.0336	0.09316	0.1206	FALSE	FALSE	FALSE	finn-b-I9_CVD_HARD	0.0168		0.04559	2.05553e-06	0.471878	1331	Brain_age_gap		0.016679
rs78364213	8	112683091	A	G	A	G	2.31826	-0.0058	0.07325	0.04001	FALSE	FALSE	FALSE	finn-b-I9_CVD_HARD	0.0279		0.8353	8.3057e-06	0.520121	1331	Brain_age_gap		0.0147281
rs985145	6	40380712	T	C	T	C	-1.30693	-0.0049	0.3107	0.3139	FALSE	FALSE	FALSE	finn-b-I9_CVD_HARD	0.0118		0.675601	7.60901e-06	0.291994	1331	Brain_age_gap		0.0148504
rs9878089	3	7965744	G	A	G	A	-1.26464	-0.0187	0.4621	0.4691	FALSE	FALSE	FALSE	finn-b-I9_CVD_HARD	0.0109		0.08628	3.67853e-06	0.273213	1331	Brain_age_gap		0.0158657
rs10490016	2	234875139	C	T	C	T	-2.81082	0.003	0.05297	0.02366	FALSE	FALSE	FALSE	finn-b-I9_STR	0.0473		0.9501	3.88386e-06	0.608733	1331	Brain_age_gap		0.0157898
rs16863620	3	188536690	A	G	A	G	-1.57222	0.0244	0.1882	0.246	FALSE	FALSE	FALSE	finn-b-I9_STR	0.0167		0.1451	8.14224e-06	0.352405	1331	Brain_age_gap		0.0147558
rs17178441	6	29708466	T	C	T	C	-2.68141	0.0304	0.05334	0.05526	FALSE	FALSE	FALSE	finn-b-I9_STR	0.0315		0.3337	8.57525e-06	0.602524	1331	Brain_age_gap		0.0146835
rs182456433	14	74307398	T	C	T	C	2.85993	0.0104	0.05409	0.07151	FALSE	FALSE	FALSE	finn-b-I9_STR	0.0279		0.7097	2.83971e-06	0.610825	1331	Brain_age_gap		0.0162274
rs1999999	1	240714262	T	G	T	G	-1.82443	-0.0123	0.1405	0.1589	FALSE	FALSE	FALSE	finn-b-I9_STR	0.0198		0.5334	6.69697e-06	0.40515	1331	Brain_age_gap		0.0150287
rs35633	16	23704005	T	C	T	C	1.43766	0.0033	0.2213	0.2635	FALSE	FALSE	FALSE	finn-b-I9_STR	0.0163		0.8397	9.87947e-06	0.325278	1331	Brain_age_gap		0.0144858
rs4365591	3	72021775	C	T	C	T	-2.15224	0.0032	0.08565	0.05509	FALSE	FALSE	FALSE	finn-b-I9_STR	0.0313		0.9185	9.22206e-06	0.485322	1331	Brain_age_gap		0.0145819
rs7110255	11	4784113	A	C	A	C	1.41416	-0.0022	0.2412	0.1552	FALSE	FALSE	FALSE	finn-b-I9_STR	0.0198		0.9129	8.33539e-06	0.317334	1331	Brain_age_gap		0.0147231
rs7558967	2	174111412	T	C	T	C	-2.24042	-0.0247	0.09316	0.1205	FALSE	FALSE	FALSE	finn-b-I9_STR	0.0221		0.2646	2.05553e-06	0.471878	1331	Brain_age_gap		0.016679
rs78364213	8	112683091	A	G	A	G	2.31826	-0.0078	0.07325	0.04006	FALSE	FALSE	FALSE	finn-b-I9_STR	0.0365		0.8314	8.3057e-06	0.520121	1331	Brain_age_gap		0.0147281
rs985145	6	40380712	T	C	T	C	-1.30693	-0.0243	0.3107	0.314	FALSE	FALSE	FALSE	finn-b-I9_STR	0.0155		0.116	7.60901e-06	0.291994	1331	Brain_age_gap		0.0148504
rs9878089	3	7965744	G	A	G	A	-1.26464	-0.0071	0.4621	0.4691	FALSE	FALSE	FALSE	finn-b-I9_STR	0.0144		0.6206	3.67853e-06	0.273213	1331	Brain_age_gap		0.0158657
rs10490016	2	234875139	C	T	C	T	-2.81082	-0.0036	0.05297	0.02366	FALSE	FALSE	FALSE	finn-b-I9_STR_SAH	0.0459		0.9379	3.88386e-06	0.608733	1331	Brain_age_gap		0.0157898
rs16863620	3	188536690	A	G	A	G	-1.57222	0.0255	0.1882	0.246	FALSE	FALSE	FALSE	finn-b-I9_STR_SAH	0.0162		0.115	8.14224e-06	0.352405	1331	Brain_age_gap		0.0147558
rs17178441	6	29708466	T	C	T	C	-2.68141	0.0342	0.05334	0.05526	FALSE	FALSE	FALSE	finn-b-I9_STR_SAH	0.0305		0.2611	8.57525e-06	0.602524	1331	Brain_age_gap		0.0146835
rs182456433	14	74307398	T	C	T	C	2.85993	0.0052	0.05409	0.07152	FALSE	FALSE	FALSE	finn-b-I9_STR_SAH	0.027		0.8475	2.83971e-06	0.610825	1331	Brain_age_gap		0.0162274
rs1999999	1	240714262	T	G	T	G	-1.82443	-0.0031	0.1405	0.1589	FALSE	FALSE	FALSE	finn-b-I9_STR_SAH	0.0192		0.8719	6.69697e-06	0.40515	1331	Brain_age_gap		0.0150287
rs35633	16	23704005	T	C	T	C	1.43766	0.0069	0.2213	0.2635	FALSE	FALSE	FALSE	finn-b-I9_STR_SAH	0.0157		0.661899	9.87947e-06	0.325278	1331	Brain_age_gap		0.0144858
rs4365591	3	72021775	C	T	C	T	-2.15224	0.0108	0.08565	0.05509	FALSE	FALSE	FALSE	finn-b-I9_STR_SAH	0.0304		0.7209	9.22206e-06	0.485322	1331	Brain_age_gap		0.0145819
rs7110255	11	4784113	A	C	A	C	1.41416	-0.0023	0.2412	0.1553	FALSE	FALSE	FALSE	finn-b-I9_STR_SAH	0.0191		0.9049	8.33539e-06	0.317334	1331	Brain_age_gap		0.0147231
rs7558967	2	174111412	T	C	T	C	-2.24042	-0.0235	0.09316	0.1205	FALSE	FALSE	FALSE	finn-b-I9_STR_SAH	0.0214		0.273	2.05553e-06	0.471878	1331	Brain_age_gap		0.016679
rs78364213	8	112683091	A	G	A	G	2.31826	-0.015	0.07325	0.04005	FALSE	FALSE	FALSE	finn-b-I9_STR_SAH	0.0354		0.6705	8.3057e-06	0.520121	1331	Brain_age_gap		0.0147281
rs985145	6	40380712	T	C	T	C	-1.30693	-0.0219	0.3107	0.314	FALSE	FALSE	FALSE	finn-b-I9_STR_SAH	0.015		0.1443	7.60901e-06	0.291994	1331	Brain_age_gap		0.0148504
rs9878089	3	7965744	G	A	G	A	-1.26464	-0.0038	0.4621	0.4692	FALSE	FALSE	FALSE	finn-b-I9_STR_SAH	0.0139		0.7862	3.67853e-06	0.273213	1331	Brain_age_gap		0.0158657
rs10490016	2	234875139	C	T	C	T	-2.81082	-0.1217	0.05297	0.02367	FALSE	FALSE	FALSE	finn-b-K11_FIBROCHIRLIV	0.1686		0.4704	3.88386e-06	0.608733	1331	Brain_age_gap		0.0157898
rs16863620	3	188536690	A	G	A	G	-1.57222	0.0287	0.1882	0.2462	FALSE	FALSE	FALSE	finn-b-K11_FIBROCHIRLIV	0.0583		0.6229	8.14224e-06	0.352405	1331	Brain_age_gap		0.0147558
rs17178441	6	29708466	T	C	T	C	-2.68141	0.2758	0.05334	0.05527	FALSE	FALSE	FALSE	finn-b-K11_FIBROCHIRLIV	0.1103		0.01242	8.57525e-06	0.602524	1331	Brain_age_gap		0.0146835
rs182456433	14	74307398	T	C	T	C	2.85993	0.1164	0.05409	0.07146	FALSE	FALSE	FALSE	finn-b-K11_FIBROCHIRLIV	0.0975		0.2326	2.83971e-06	0.610825	1331	Brain_age_gap		0.0162274
rs1999999	1	240714262	T	G	T	G	-1.82443	-0.0768	0.1405	0.1587	FALSE	FALSE	FALSE	finn-b-K11_FIBROCHIRLIV	0.069		0.2662	6.69697e-06	0.40515	1331	Brain_age_gap		0.0150287
rs35633	16	23704005	T	C	T	C	1.43766	-0.0337	0.2213	0.2636	FALSE	FALSE	FALSE	finn-b-K11_FIBROCHIRLIV	0.0569		0.5533	9.87947e-06	0.325278	1331	Brain_age_gap		0.0144858
rs4365591	3	72021775	C	T	C	T	-2.15224	0.0538	0.08565	0.05503	FALSE	FALSE	FALSE	finn-b-K11_FIBROCHIRLIV	0.1096		0.6233	9.22206e-06	0.485322	1331	Brain_age_gap		0.0145819
rs7110255	11	4784113	A	C	A	C	1.41416	0.003	0.2412	0.1551	FALSE	FALSE	FALSE	finn-b-K11_FIBROCHIRLIV	0.0692		0.9648	8.33539e-06	0.317334	1331	Brain_age_gap		0.0147231
rs7558967	2	174111412	T	C	T	C	-2.24042	-0.02	0.09316	0.1208	FALSE	FALSE	FALSE	finn-b-K11_FIBROCHIRLIV	0.0774		0.7963	2.05553e-06	0.471878	1331	Brain_age_gap		0.016679
rs78364213	8	112683091	A	G	A	G	2.31826	-0.0493	0.07325	0.03995	FALSE	FALSE	FALSE	finn-b-K11_FIBROCHIRLIV	0.1282		0.7006	8.3057e-06	0.520121	1331	Brain_age_gap		0.0147281
rs985145	6	40380712	T	C	T	C	-1.30693	-0.036	0.3107	0.314	FALSE	FALSE	FALSE	finn-b-K11_FIBROCHIRLIV	0.0541		0.5061	7.60901e-06	0.291994	1331	Brain_age_gap		0.0148504
rs9878089	3	7965744	G	A	G	A	-1.26464	-0.0415	0.4621	0.4691	FALSE	FALSE	FALSE	finn-b-K11_FIBROCHIRLIV	0.0501		0.4079	3.67853e-06	0.273213	1331	Brain_age_gap		0.0158657
rs10490016	2	234875139	C	T	C	T	-2.81082	0.2183	0.05297	0.02364	FALSE	FALSE	FALSE	finn-b-T1D_STRICT	0.1027		0.0334904	3.88386e-06	0.608733	1331	Brain_age_gap		0.0157898
rs16863620	3	188536690	A	G	A	G	-1.57222	-0.0121	0.1882	0.2459	FALSE	FALSE	FALSE	finn-b-T1D_STRICT	0.0362		0.7376	8.14224e-06	0.352405	1331	Brain_age_gap		0.0147558
rs17178441	6	29708466	T	C	T	C	-2.68141	-0.1691	0.05334	0.05506	FALSE	FALSE	FALSE	finn-b-T1D_STRICT	0.0675		0.01228	8.57525e-06	0.602524	1331	Brain_age_gap		0.0146835
rs182456433	14	74307398	T	C	T	C	2.85993	0.0143	0.05409	0.07158	FALSE	FALSE	FALSE	finn-b-T1D_STRICT	0.0604		0.8129	2.83971e-06	0.610825	1331	Brain_age_gap		0.0162274
rs1999999	1	240714262	T	G	T	G	-1.82443	0.0277	0.1405	0.159	FALSE	FALSE	FALSE	finn-b-T1D_STRICT	0.0429		0.5182	6.69697e-06	0.40515	1331	Brain_age_gap		0.0150287
rs35633	16	23704005	T	C	T	C	1.43766	-0.046	0.2213	0.2633	FALSE	FALSE	FALSE	finn-b-T1D_STRICT	0.0356		0.1971	9.87947e-06	0.325278	1331	Brain_age_gap		0.0144858
rs4365591	3	72021775	C	T	C	T	-2.15224	-0.0355	0.08565	0.05518	FALSE	FALSE	FALSE	finn-b-T1D_STRICT	0.0693		0.6088	9.22206e-06	0.485322	1331	Brain_age_gap		0.0145819
rs7110255	11	4784113	A	C	A	C	1.41416	-0.0103	0.2412	0.1556	FALSE	FALSE	FALSE	finn-b-T1D_STRICT	0.0433		0.8115	8.33539e-06	0.317334	1331	Brain_age_gap		0.0147231
rs7558967	2	174111412	T	C	T	C	-2.24042	-0.0623	0.09316	0.1208	FALSE	FALSE	FALSE	finn-b-T1D_STRICT	0.0483		0.1969	2.05553e-06	0.471878	1331	Brain_age_gap		0.016679
rs78364213	8	112683091	A	G	A	G	2.31826	0.1339	0.07325	0.04001	FALSE	FALSE	FALSE	finn-b-T1D_STRICT	0.0811		0.0986211	8.3057e-06	0.520121	1331	Brain_age_gap		0.0147281
rs985145	6	40380712	T	C	T	C	-1.30693	-0.0121	0.3107	0.3143	FALSE	FALSE	FALSE	finn-b-T1D_STRICT	0.034		0.7226	7.60901e-06	0.291994	1331	Brain_age_gap		0.0148504
rs9878089	3	7965744	G	A	G	A	-1.26464	0.0054	0.4621	0.4687	FALSE	FALSE	FALSE	finn-b-T1D_STRICT	0.0313		0.8623	3.67853e-06	0.273213	1331	Brain_age_gap		0.0158657
rs10490016	2	234875139	C	T	C	T	-2.81082	0.2194	0.05297	0.02362	FALSE	FALSE	FALSE	finn-b-T1D_STRICT1	0.1079		0.0419199	3.88386e-06	0.608733	1331	Brain_age_gap		0.0157898
rs16863620	3	188536690	A	G	A	G	-1.57222	-0.0177	0.1882	0.2458	FALSE	FALSE	FALSE	finn-b-T1D_STRICT1	0.0379		0.6407	8.14224e-06	0.352405	1331	Brain_age_gap		0.0147558
rs17178441	6	29708466	T	C	T	C	-2.68141	-0.1651	0.05334	0.05502	FALSE	FALSE	FALSE	finn-b-T1D_STRICT1	0.0707		0.0195799	8.57525e-06	0.602524	1331	Brain_age_gap		0.0146835
rs182456433	14	74307398	T	C	T	C	2.85993	0.0225	0.05409	0.07146	FALSE	FALSE	FALSE	finn-b-T1D_STRICT1	0.0633		0.722099	2.83971e-06	0.610825	1331	Brain_age_gap		0.0162274
rs1999999	1	240714262	T	G	T	G	-1.82443	0.0313	0.1405	0.1591	FALSE	FALSE	FALSE	finn-b-T1D_STRICT1	0.0449		0.4862	6.69697e-06	0.40515	1331	Brain_age_gap		0.0150287
rs35633	16	23704005	T	C	T	C	1.43766	-0.0246	0.2213	0.2633	FALSE	FALSE	FALSE	finn-b-T1D_STRICT1	0.0373		0.510199	9.87947e-06	0.325278	1331	Brain_age_gap		0.0144858
rs4365591	3	72021775	C	T	C	T	-2.15224	-0.0374	0.08565	0.05519	FALSE	FALSE	FALSE	finn-b-T1D_STRICT1	0.0727		0.606301	9.22206e-06	0.485322	1331	Brain_age_gap		0.0145819
rs7110255	11	4784113	A	C	A	C	1.41416	-0.0159	0.2412	0.1555	FALSE	FALSE	FALSE	finn-b-T1D_STRICT1	0.0454		0.725499	8.33539e-06	0.317334	1331	Brain_age_gap		0.0147231
rs7558967	2	174111412	T	C	T	C	-2.24042	-0.0572	0.09316	0.1208	FALSE	FALSE	FALSE	finn-b-T1D_STRICT1	0.0504		0.2567	2.05553e-06	0.471878	1331	Brain_age_gap		0.016679
rs78364213	8	112683091	A	G	A	G	2.31826	0.1316	0.07325	0.03999	FALSE	FALSE	FALSE	finn-b-T1D_STRICT1	0.0849		0.121	8.3057e-06	0.520121	1331	Brain_age_gap		0.0147281
rs985145	6	40380712	T	C	T	C	-1.30693	-0.0256	0.3107	0.3143	FALSE	FALSE	FALSE	finn-b-T1D_STRICT1	0.0357		0.4734	7.60901e-06	0.291994	1331	Brain_age_gap		0.0148504
rs9878089	3	7965744	G	A	G	A	-1.26464	0.0144	0.4621	0.4689	FALSE	FALSE	FALSE	finn-b-T1D_STRICT1	0.0327		0.6612	3.67853e-06	0.273213	1331	Brain_age_gap		0.0158657
rs10490016	2	234875139	C	T	C	T	-2.81082	0.7456	0.05297	0.02357	FALSE	FALSE	FALSE	finn-b-T1D_STRICT2	0.4742		0.1159	3.88386e-06	0.608733	1331	Brain_age_gap		0.0157898
rs16863620	3	188536690	A	G	A	G	-1.57222	-0.0729	0.1882	0.2458	FALSE	FALSE	FALSE	finn-b-T1D_STRICT2	0.1676		0.6637	8.14224e-06	0.352405	1331	Brain_age_gap		0.0147558
rs17178441	6	29708466	T	C	T	C	-2.68141	0.1799	0.05334	0.05508	FALSE	FALSE	FALSE	finn-b-T1D_STRICT2	0.3124		0.5647	8.57525e-06	0.602524	1331	Brain_age_gap		0.0146835
rs182456433	14	74307398	T	C	T	C	2.85993	-0.2487	0.05409	0.07141	FALSE	FALSE	FALSE	finn-b-T1D_STRICT2	0.2779		0.3707	2.83971e-06	0.610825	1331	Brain_age_gap		0.0162274
rs1999999	1	240714262	T	G	T	G	-1.82443	0.1331	0.1405	0.159	FALSE	FALSE	FALSE	finn-b-T1D_STRICT2	0.1972		0.4998	6.69697e-06	0.40515	1331	Brain_age_gap		0.0150287
rs35633	16	23704005	T	C	T	C	1.43766	-0.2189	0.2213	0.2633	FALSE	FALSE	FALSE	finn-b-T1D_STRICT2	0.1635		0.1806	9.87947e-06	0.325278	1331	Brain_age_gap		0.0144858
rs4365591	3	72021775	C	T	C	T	-2.15224	0.1444	0.08565	0.05523	FALSE	FALSE	FALSE	finn-b-T1D_STRICT2	0.3182		0.6501	9.22206e-06	0.485322	1331	Brain_age_gap		0.0145819
rs7110255	11	4784113	A	C	A	C	1.41416	0.1846	0.2412	0.1556	FALSE	FALSE	FALSE	finn-b-T1D_STRICT2	0.1989		0.3534	8.33539e-06	0.317334	1331	Brain_age_gap		0.0147231
rs7558967	2	174111412	T	C	T	C	-2.24042	-0.2776	0.09316	0.1209	FALSE	FALSE	FALSE	finn-b-T1D_STRICT2	0.2215		0.2101	2.05553e-06	0.471878	1331	Brain_age_gap		0.016679
rs78364213	8	112683091	A	G	A	G	2.31826	-0.1915	0.07325	0.03995	FALSE	FALSE	FALSE	finn-b-T1D_STRICT2	0.3766		0.6111	8.3057e-06	0.520121	1331	Brain_age_gap		0.0147281
rs985145	6	40380712	T	C	T	C	-1.30693	0.139	0.3107	0.3144	FALSE	FALSE	FALSE	finn-b-T1D_STRICT2	0.1557		0.3719	7.60901e-06	0.291994	1331	Brain_age_gap		0.0148504
rs9878089	3	7965744	G	A	G	A	-1.26464	-0.0446	0.4621	0.4688	FALSE	FALSE	FALSE	finn-b-T1D_STRICT2	0.1441		0.757	3.67853e-06	0.273213	1331	Brain_age_gap		0.0158657
rs10490016	2	234875139	C	T	C	T	-2.81082	0.0841	0.05297	0.02368	FALSE	FALSE	FALSE	finn-b-T1D_WIDE	0.0643		0.1908	3.88386e-06	0.608733	1331	Brain_age_gap		0.0157898
rs16863620	3	188536690	A	G	A	G	-1.57222	0.0178	0.1882	0.246	FALSE	FALSE	FALSE	finn-b-T1D_WIDE	0.023		0.4396	8.14224e-06	0.352405	1331	Brain_age_gap		0.0147558
rs17178441	6	29708466	T	C	T	C	-2.68141	-0.084	0.05334	0.05513	FALSE	FALSE	FALSE	finn-b-T1D_WIDE	0.0425		0.0478498	8.57525e-06	0.602524	1331	Brain_age_gap		0.0146835
rs182456433	14	74307398	T	C	T	C	2.85993	0.0121	0.05409	0.07158	FALSE	FALSE	FALSE	finn-b-T1D_WIDE	0.0384		0.751799	2.83971e-06	0.610825	1331	Brain_age_gap		0.0162274
rs1999999	1	240714262	T	G	T	G	-1.82443	-0.0113	0.1405	0.1588	FALSE	FALSE	FALSE	finn-b-T1D_WIDE	0.0273		0.6798	6.69697e-06	0.40515	1331	Brain_age_gap		0.0150287
rs35633	16	23704005	T	C	T	C	1.43766	-0.0141	0.2213	0.2632	FALSE	FALSE	FALSE	finn-b-T1D_WIDE	0.0225		0.5316	9.87947e-06	0.325278	1331	Brain_age_gap		0.0144858
rs4365591	3	72021775	C	T	C	T	-2.15224	-0.0804	0.08565	0.05507	FALSE	FALSE	FALSE	finn-b-T1D_WIDE	0.0437		0.0656493	9.22206e-06	0.485322	1331	Brain_age_gap		0.0145819
rs7110255	11	4784113	A	C	A	C	1.41416	0.0037	0.2412	0.1556	FALSE	FALSE	FALSE	finn-b-T1D_WIDE	0.0273		0.8913	8.33539e-06	0.317334	1331	Brain_age_gap		0.0147231
rs7558967	2	174111412	T	C	T	C	-2.24042	-0.0615	0.09316	0.1207	FALSE	FALSE	FALSE	finn-b-T1D_WIDE	0.0305		0.0433501	2.05553e-06	0.471878	1331	Brain_age_gap		0.016679
rs78364213	8	112683091	A	G	A	G	2.31826	-0.0103	0.07325	0.03997	FALSE	FALSE	FALSE	finn-b-T1D_WIDE	0.0504		0.8383	8.3057e-06	0.520121	1331	Brain_age_gap		0.0147281
rs985145	6	40380712	T	C	T	C	-1.30693	-0.0269	0.3107	0.3141	FALSE	FALSE	FALSE	finn-b-T1D_WIDE	0.0214		0.2088	7.60901e-06	0.291994	1331	Brain_age_gap		0.0148504
rs9878089	3	7965744	G	A	G	A	-1.26464	0.0403	0.4621	0.469	FALSE	FALSE	FALSE	finn-b-T1D_WIDE	0.0198		0.0417398	3.67853e-06	0.273213	1331	Brain_age_gap		0.0158657
rs10490016	2	234875139	C	T	C	T	-2.81082	0.1031	0.05297	0.02361	FALSE	FALSE	FALSE	finn-b-T1D_WIDE1	0.0764		0.1771	3.88386e-06	0.608733	1331	Brain_age_gap		0.0157898
rs16863620	3	188536690	A	G	A	G	-1.57222	0.0192	0.1882	0.2459	FALSE	FALSE	FALSE	finn-b-T1D_WIDE1	0.0268		0.4741	8.14224e-06	0.352405	1331	Brain_age_gap		0.0147558
rs17178441	6	29708466	T	C	T	C	-2.68141	-0.0957	0.05334	0.05507	FALSE	FALSE	FALSE	finn-b-T1D_WIDE1	0.0494		0.0527497	8.57525e-06	0.602524	1331	Brain_age_gap		0.0146835
rs182456433	14	74307398	T	C	T	C	2.85993	0.0327	0.05409	0.07151	FALSE	FALSE	FALSE	finn-b-T1D_WIDE1	0.0446		0.4631	2.83971e-06	0.610825	1331	Brain_age_gap		0.0162274
rs1999999	1	240714262	T	G	T	G	-1.82443	0.0063	0.1405	0.159	FALSE	FALSE	FALSE	finn-b-T1D_WIDE1	0.0318		0.8425	6.69697e-06	0.40515	1331	Brain_age_gap		0.0150287
rs35633	16	23704005	T	C	T	C	1.43766	-0.0089	0.2213	0.2633	FALSE	FALSE	FALSE	finn-b-T1D_WIDE1	0.0262		0.735301	9.87947e-06	0.325278	1331	Brain_age_gap		0.0144858
rs4365591	3	72021775	C	T	C	T	-2.15224	-0.0826	0.08565	0.05511	FALSE	FALSE	FALSE	finn-b-T1D_WIDE1	0.0511		0.1055	9.22206e-06	0.485322	1331	Brain_age_gap		0.0145819
rs7110255	11	4784113	A	C	A	C	1.41416	-0.0204	0.2412	0.1555	FALSE	FALSE	FALSE	finn-b-T1D_WIDE1	0.032		0.523	8.33539e-06	0.317334	1331	Brain_age_gap		0.0147231
rs7558967	2	174111412	T	C	T	C	-2.24042	-0.0514	0.09316	0.1208	FALSE	FALSE	FALSE	finn-b-T1D_WIDE1	0.0356		0.1482	2.05553e-06	0.471878	1331	Brain_age_gap		0.016679
rs78364213	8	112683091	A	G	A	G	2.31826	-0.0014	0.07325	0.03996	FALSE	FALSE	FALSE	finn-b-T1D_WIDE1	0.0589		0.9806	8.3057e-06	0.520121	1331	Brain_age_gap		0.0147281
rs985145	6	40380712	T	C	T	C	-1.30693	-0.0347	0.3107	0.3142	FALSE	FALSE	FALSE	finn-b-T1D_WIDE1	0.025		0.1655	7.60901e-06	0.291994	1331	Brain_age_gap		0.0148504
rs9878089	3	7965744	G	A	G	A	-1.26464	0.0391	0.4621	0.469	FALSE	FALSE	FALSE	finn-b-T1D_WIDE1	0.0231		0.0900803	3.67853e-06	0.273213	1331	Brain_age_gap		0.0158657
rs10490016	2	234875139	C	T	C	T	-2.81082	-0.0246	0.05297	0.02356	FALSE	FALSE	FALSE	finn-b-T1D_WIDE2	0.2537		0.9227	3.88386e-06	0.608733	1331	Brain_age_gap		0.0157898
rs16863620	3	188536690	A	G	A	G	-1.57222	-0.0371	0.1882	0.2458	FALSE	FALSE	FALSE	finn-b-T1D_WIDE2	0.0928		0.6897	8.14224e-06	0.352405	1331	Brain_age_gap		0.0147558
rs17178441	6	29708466	T	C	T	C	-2.68141	-0.0293	0.05334	0.05508	FALSE	FALSE	FALSE	finn-b-T1D_WIDE2	0.1711		0.8639	8.57525e-06	0.602524	1331	Brain_age_gap		0.0146835
rs182456433	14	74307398	T	C	T	C	2.85993	0.1059	0.05409	0.07143	FALSE	FALSE	FALSE	finn-b-T1D_WIDE2	0.1547		0.4936	2.83971e-06	0.610825	1331	Brain_age_gap		0.0162274
rs1999999	1	240714262	T	G	T	G	-1.82443	-0.0801	0.1405	0.159	FALSE	FALSE	FALSE	finn-b-T1D_WIDE2	0.1099		0.4659	6.69697e-06	0.40515	1331	Brain_age_gap		0.0150287
rs35633	16	23704005	T	C	T	C	1.43766	-0.1223	0.2213	0.2633	FALSE	FALSE	FALSE	finn-b-T1D_WIDE2	0.0904		0.1763	9.87947e-06	0.325278	1331	Brain_age_gap		0.0144858
rs4365591	3	72021775	C	T	C	T	-2.15224	-0.1226	0.08565	0.05521	FALSE	FALSE	FALSE	finn-b-T1D_WIDE2	0.175		0.483499	9.22206e-06	0.485322	1331	Brain_age_gap		0.0145819
rs7110255	11	4784113	A	C	A	C	1.41416	-0.0079	0.2412	0.1556	FALSE	FALSE	FALSE	finn-b-T1D_WIDE2	0.1095		0.9423	8.33539e-06	0.317334	1331	Brain_age_gap		0.0147231
rs7558967	2	174111412	T	C	T	C	-2.24042	-0.196	0.09316	0.1209	FALSE	FALSE	FALSE	finn-b-T1D_WIDE2	0.1208		0.1046	2.05553e-06	0.471878	1331	Brain_age_gap		0.016679
rs78364213	8	112683091	A	G	A	G	2.31826	-0.16	0.07325	0.03995	FALSE	FALSE	FALSE	finn-b-T1D_WIDE2	0.2056		0.4367	8.3057e-06	0.520121	1331	Brain_age_gap		0.0147281
rs985145	6	40380712	T	C	T	C	-1.30693	0.0006	0.3107	0.3144	FALSE	FALSE	FALSE	finn-b-T1D_WIDE2	0.0857		0.9945	7.60901e-06	0.291994	1331	Brain_age_gap		0.0148504
rs9878089	3	7965744	G	A	G	A	-1.26464	-0.0031	0.4621	0.4688	FALSE	FALSE	FALSE	finn-b-T1D_WIDE2	0.0793		0.969	3.67853e-06	0.273213	1331	Brain_age_gap		0.0158657
rs10490016	2	234875139	C	T	C	T	-2.81082	0.0128	0.05297	0.0236	FALSE	FALSE	FALSE	finn-b-T2D	0.0361		0.7217	3.88386e-06	0.608733	1331	Brain_age_gap		0.0157898
rs16863620	3	188536690	A	G	A	G	-1.57222	0.0002	0.1882	0.2459	FALSE	FALSE	FALSE	finn-b-T2D	0.0126		0.9888	8.14224e-06	0.352405	1331	Brain_age_gap		0.0147558
rs17178441	6	29708466	T	C	T	C	-2.68141	0.0216	0.05334	0.05535	FALSE	FALSE	FALSE	finn-b-T2D	0.0237		0.3625	8.57525e-06	0.602524	1331	Brain_age_gap		0.0146835
rs182456433	14	74307398	T	C	T	C	2.85993	-0.002	0.05409	0.07147	FALSE	FALSE	FALSE	finn-b-T2D	0.021		0.9255	2.83971e-06	0.610825	1331	Brain_age_gap		0.0162274
rs1999999	1	240714262	T	G	T	G	-1.82443	-0.004	0.1405	0.1588	FALSE	FALSE	FALSE	finn-b-T2D	0.0149		0.786401	6.69697e-06	0.40515	1331	Brain_age_gap		0.0150287
rs35633	16	23704005	T	C	T	C	1.43766	-0.0003	0.2213	0.2637	FALSE	FALSE	FALSE	finn-b-T2D	0.0123		0.982	9.87947e-06	0.325278	1331	Brain_age_gap		0.0144858
rs4365591	3	72021775	C	T	C	T	-2.15224	-0.0101	0.08565	0.05515	FALSE	FALSE	FALSE	finn-b-T2D	0.0237		0.6708	9.22206e-06	0.485322	1331	Brain_age_gap		0.0145819
rs7110255	11	4784113	A	C	A	C	1.41416	-0.0308	0.2412	0.1551	FALSE	FALSE	FALSE	finn-b-T2D	0.015		0.0396497	8.33539e-06	0.317334	1331	Brain_age_gap		0.0147231
rs7558967	2	174111412	T	C	T	C	-2.24042	-0.0136	0.09316	0.1207	FALSE	FALSE	FALSE	finn-b-T2D	0.0166		0.414	2.05553e-06	0.471878	1331	Brain_age_gap		0.016679
rs78364213	8	112683091	A	G	A	G	2.31826	0.0018	0.07325	0.04001	FALSE	FALSE	FALSE	finn-b-T2D	0.0276		0.9489	8.3057e-06	0.520121	1331	Brain_age_gap		0.0147281
rs985145	6	40380712	T	C	T	C	-1.30693	-0.0164	0.3107	0.3141	FALSE	FALSE	FALSE	finn-b-T2D	0.0117		0.1598	7.60901e-06	0.291994	1331	Brain_age_gap		0.0148504
rs9878089	3	7965744	G	A	G	A	-1.26464	0.0096	0.4621	0.4689	FALSE	FALSE	FALSE	finn-b-T2D	0.0108		0.3765	3.67853e-06	0.273213	1331	Brain_age_gap		0.0158657
rs10490016	2	234875139	C	T	C	T	-2.81082	0.0108	0.05297	0.02358	FALSE	FALSE	FALSE	finn-b-T2D_INCLAVO	0.0365		0.766999	3.88386e-06	0.608733	1331	Brain_age_gap		0.0157898
rs16863620	3	188536690	A	G	A	G	-1.57222	0.004	0.1882	0.2458	FALSE	FALSE	FALSE	finn-b-T2D_INCLAVO	0.0127		0.7552	8.14224e-06	0.352405	1331	Brain_age_gap		0.0147558
rs17178441	6	29708466	T	C	T	C	-2.68141	0.0285	0.05334	0.05535	FALSE	FALSE	FALSE	finn-b-T2D_INCLAVO	0.024		0.2352	8.57525e-06	0.602524	1331	Brain_age_gap		0.0146835
rs182456433	14	74307398	T	C	T	C	2.85993	-0.0031	0.05409	0.0714	FALSE	FALSE	FALSE	finn-b-T2D_INCLAVO	0.0213		0.8838	2.83971e-06	0.610825	1331	Brain_age_gap		0.0162274
rs1999999	1	240714262	T	G	T	G	-1.82443	-0.0049	0.1405	0.1589	FALSE	FALSE	FALSE	finn-b-T2D_INCLAVO	0.0151		0.743401	6.69697e-06	0.40515	1331	Brain_age_gap		0.0150287
rs35633	16	23704005	T	C	T	C	1.43766	-0.001	0.2213	0.2636	FALSE	FALSE	FALSE	finn-b-T2D_INCLAVO	0.0124		0.934	9.87947e-06	0.325278	1331	Brain_age_gap		0.0144858
rs4365591	3	72021775	C	T	C	T	-2.15224	-0.0133	0.08565	0.05514	FALSE	FALSE	FALSE	finn-b-T2D_INCLAVO	0.024		0.579399	9.22206e-06	0.485322	1331	Brain_age_gap		0.0145819
rs7110255	11	4784113	A	C	A	C	1.41416	-0.0327	0.2412	0.155	FALSE	FALSE	FALSE	finn-b-T2D_INCLAVO	0.0151		0.0307999	8.33539e-06	0.317334	1331	Brain_age_gap		0.0147231
rs7558967	2	174111412	T	C	T	C	-2.24042	-0.0194	0.09316	0.1208	FALSE	FALSE	FALSE	finn-b-T2D_INCLAVO	0.0168		0.2502	2.05553e-06	0.471878	1331	Brain_age_gap		0.016679
rs78364213	8	112683091	A	G	A	G	2.31826	0.0074	0.07325	0.04003	FALSE	FALSE	FALSE	finn-b-T2D_INCLAVO	0.0279		0.7907	8.3057e-06	0.520121	1331	Brain_age_gap		0.0147281
rs985145	6	40380712	T	C	T	C	-1.30693	-0.016	0.3107	0.3143	FALSE	FALSE	FALSE	finn-b-T2D_INCLAVO	0.0118		0.1745	7.60901e-06	0.291994	1331	Brain_age_gap		0.0148504
rs9878089	3	7965744	G	A	G	A	-1.26464	0.0092	0.4621	0.4691	FALSE	FALSE	FALSE	finn-b-T2D_INCLAVO	0.0109		0.4031	3.67853e-06	0.273213	1331	Brain_age_gap		0.0158657
rs10490016	2	234875139	C	T	C	T	-2.81082	0.0184	0.05297	0.02371	FALSE	FALSE	FALSE	finn-b-T2D_WIDE	0.0434		0.6724	3.88386e-06	0.608733	1331	Brain_age_gap		0.0157898
rs16863620	3	188536690	A	G	A	G	-1.57222	0.0157	0.1882	0.2461	FALSE	FALSE	FALSE	finn-b-T2D_WIDE	0.0152		0.3011	8.14224e-06	0.352405	1331	Brain_age_gap		0.0147558
rs17178441	6	29708466	T	C	T	C	-2.68141	-0.0039	0.05334	0.05519	FALSE	FALSE	FALSE	finn-b-T2D_WIDE	0.0286		0.8911	8.57525e-06	0.602524	1331	Brain_age_gap		0.0146835
rs182456433	14	74307398	T	C	T	C	2.85993	-0.0003	0.05409	0.07137	FALSE	FALSE	FALSE	finn-b-T2D_WIDE	0.0255		0.9894	2.83971e-06	0.610825	1331	Brain_age_gap		0.0162274
rs1999999	1	240714262	T	G	T	G	-1.82443	-0.0026	0.1405	0.159	FALSE	FALSE	FALSE	finn-b-T2D_WIDE	0.018		0.8857	6.69697e-06	0.40515	1331	Brain_age_gap		0.0150287
rs35633	16	23704005	T	C	T	C	1.43766	0.0171	0.2213	0.2635	FALSE	FALSE	FALSE	finn-b-T2D_WIDE	0.0148		0.2487	9.87947e-06	0.325278	1331	Brain_age_gap		0.0144858
rs4365591	3	72021775	C	T	C	T	-2.15224	0.0026	0.08565	0.05519	FALSE	FALSE	FALSE	finn-b-T2D_WIDE	0.0286		0.9288	9.22206e-06	0.485322	1331	Brain_age_gap		0.0145819
rs7110255	11	4784113	A	C	A	C	1.41416	-0.0336	0.2412	0.1554	FALSE	FALSE	FALSE	finn-b-T2D_WIDE	0.0181		0.0628796	8.33539e-06	0.317334	1331	Brain_age_gap		0.0147231
rs7558967	2	174111412	T	C	T	C	-2.24042	-0.0179	0.09316	0.1207	FALSE	FALSE	FALSE	finn-b-T2D_WIDE	0.0202		0.3734	2.05553e-06	0.471878	1331	Brain_age_gap		0.016679
rs78364213	8	112683091	A	G	A	G	2.31826	-0.0256	0.07325	0.04003	FALSE	FALSE	FALSE	finn-b-T2D_WIDE	0.0332		0.4406	8.3057e-06	0.520121	1331	Brain_age_gap		0.0147281
rs985145	6	40380712	T	C	T	C	-1.30693	-0.0189	0.3107	0.3142	FALSE	FALSE	FALSE	finn-b-T2D_WIDE	0.0141		0.1811	7.60901e-06	0.291994	1331	Brain_age_gap		0.0148504
rs9878089	3	7965744	G	A	G	A	-1.26464	0.0055	0.4621	0.469	FALSE	FALSE	FALSE	finn-b-T2D_WIDE	0.0131		0.6758	3.67853e-06	0.273213	1331	Brain_age_gap		0.0158657
rs10490016	2	234875139	C	T	C	T	-2.81082	0.00207096	0.05297	0.0545924	FALSE	FALSE	FALSE	ukb-a-306	0.0011522	336473	0.0722737	3.88386e-06	0.608733	1331	Brain_age_gap	TRUE	0.0157898	9.60143e-06	TRUE	7.40312e-06
rs16863620	3	188536690	A	G	A	G	-1.57222	9.00137e-05	0.1882	0.176556	FALSE	FALSE	FALSE	ukb-a-306	0.000683357	336473	0.895204	8.14224e-06	0.352405	1331	Brain_age_gap	TRUE	0.0147558	5.15673e-08	TRUE	9.35102e-06
rs17178441	6	29708466	T	C	T	C	-2.68141	0.000230623	0.05334	0.0378664	FALSE	FALSE	FALSE	ukb-a-306	0.00136558	336473	0.865889	8.57525e-06	0.602524	1331	Brain_age_gap	TRUE	0.0146835	8.47663e-08	TRUE	9.94692e-06
rs182456433	14	74307398	T	C	T	C	2.85993	0.00281286	0.05409	0.051652	FALSE	FALSE	FALSE	ukb-a-306	0.00118198	336473	0.0173237	2.83971e-06	0.610825	1331	Brain_age_gap	TRUE	0.0162274	1.68314e-05	TRUE	6.50866e-06
rs1999999	1	240714262	T	G	T	G	-1.82443	-0.000440465	0.1405	0.139048	FALSE	FALSE	FALSE	ukb-a-306	0.000770066	336473	0.567333	6.69697e-06	0.40515	1331	Brain_age_gap	TRUE	0.0150287	9.72342e-07	TRUE	8.77541e-06
rs35633	16	23704005	T	C	T	C	1.43766	-0.000334103	0.2213	0.2092	FALSE	FALSE	FALSE	ukb-a-306	0.000640947	336473	0.602182	9.87947e-06	0.325278	1331	Brain_age_gap	TRUE	0.0144858	8.07548e-07	TRUE	1.26529e-05
rs4365591	3	72021775	C	T	C	T	-2.15224	-0.000626316	0.08565	0.0958188	FALSE	FALSE	FALSE	ukb-a-306	0.000885276	336473	0.479268	9.22206e-06	0.485322	1331	Brain_age_gap	TRUE	0.0145819	1.48758e-06	TRUE	1.24781e-05
rs7110255	11	4784113	A	C	A	C	1.41416	-0.000123536	0.2412	0.250142	FALSE	FALSE	FALSE	ukb-a-306	0.00060118	336473	0.837191	8.33539e-06	0.317334	1331	Brain_age_gap	TRUE	0.0147231	1.25496e-07	TRUE	9.77651e-06
rs7558967	2	174111412	T	C	T	C	-2.24042	0.000187992	0.09316	0.0983129	FALSE	FALSE	FALSE	ukb-a-306	0.000873993	336473	0.829693	2.05553e-06	0.471878	1331	Brain_age_gap	TRUE	0.016679	1.37504e-07	TRUE	2.47735e-06
rs78364213	8	112683091	A	G	A	G	2.31826	0.00184677	0.07325	0.0738718	FALSE	FALSE	FALSE	ukb-a-306	0.000994771	336473	0.0633855	8.3057e-06	0.520121	1331	Brain_age_gap	TRUE	0.0147281	1.0243e-05	TRUE	1.56526e-05
rs985145	6	40380712	T	C	T	C	-1.30693	-0.000671883	0.3107	0.332291	FALSE	FALSE	FALSE	ukb-a-306	0.000554331	336473	0.22549	7.60901e-06	0.291994	1331	Brain_age_gap	TRUE	0.0148504	4.36616e-06	TRUE	1.19624e-05
rs9878089	3	7965744	G	A	G	A	-1.26464	-0.000197346	0.4621	0.433441	FALSE	FALSE	FALSE	ukb-a-306	0.000525666	336473	0.707348	3.67853e-06	0.273213	1331	Brain_age_gap	TRUE	0.0158657	4.18879e-07	TRUE	4.60415e-06
rs10490016	2	234875139	C	T	C	T	-2.81082	0.000883008	0.05297	0.0545924	FALSE	FALSE	FALSE	ukb-a-63	0.00080266	337159	0.271288	3.88386e-06	0.608733	1331	Brain_age_gap	TRUE	0.0157898	3.58949e-06	TRUE	6.02343e-06
rs16863620	3	188536690	A	G	A	G	-1.57222	-3.87704e-05	0.1882	0.176556	FALSE	FALSE	FALSE	ukb-a-63	0.000476042	337159	0.93509	8.14224e-06	0.352405	1331	Brain_age_gap	TRUE	0.0147558	1.96733e-08	TRUE	9.21424e-06
rs17178441	6	29708466	T	C	T	C	-2.68141	0.00317907	0.05334	0.0378664	FALSE	FALSE	FALSE	ukb-a-63	0.000951382	337159	0.000833278	8.57525e-06	0.602524	1331	Brain_age_gap	TRUE	0.0146835	3.31164e-05	TRUE	2.44704e-05
rs182456433	14	74307398	T	C	T	C	2.85993	0.000643856	0.05409	0.051652	FALSE	FALSE	FALSE	ukb-a-63	0.000823449	337159	0.434273	2.83971e-06	0.610825	1331	Brain_age_gap	TRUE	0.0162274	1.81331e-06	TRUE	4.03814e-06
rs1999999	1	240714262	T	G	T	G	-1.82443	-0.0002669	0.1405	0.139048	FALSE	FALSE	FALSE	ukb-a-63	0.000536526	337159	0.618865	6.69697e-06	0.40515	1331	Brain_age_gap	TRUE	0.0150287	7.33978e-07	TRUE	8.58465e-06
rs35633	16	23704005	T	C	T	C	1.43766	0.000156733	0.2213	0.2092	FALSE	FALSE	FALSE	ukb-a-63	0.000446526	337159	0.725585	9.87947e-06	0.325278	1331	Brain_age_gap	TRUE	0.0144858	3.65422e-07	TRUE	1.20468e-05
rs4365591	3	72021775	C	T	C	T	-2.15224	0.000399762	0.08565	0.0958188	FALSE	FALSE	FALSE	ukb-a-63	0.000616738	337159	0.516864	9.22206e-06	0.485322	1331	Brain_age_gap	TRUE	0.0145819	1.24615e-06	TRUE	1.22641e-05
rs7110255	11	4784113	A	C	A	C	1.41416	-0.000367985	0.2412	0.250142	FALSE	FALSE	FALSE	ukb-a-63	0.000418824	337159	0.379611	8.33539e-06	0.317334	1331	Brain_age_gap	TRUE	0.0147231	2.28962e-06	TRUE	1.18719e-05
rs7558967	2	174111412	T	C	T	C	-2.24042	-0.000107176	0.09316	0.0983129	FALSE	FALSE	FALSE	ukb-a-63	0.000608827	337159	0.860265	2.05553e-06	0.471878	1331	Brain_age_gap	TRUE	0.016679	9.19126e-08	TRUE	2.44739e-06
rs78364213	8	112683091	A	G	A	G	2.31826	-0.00118935	0.07325	0.0738718	FALSE	FALSE	FALSE	ukb-a-63	0.000692984	337159	0.0861133	8.3057e-06	0.520121	1331	Brain_age_gap	TRUE	0.0147281	8.73649e-06	TRUE	1.50322e-05
rs985145	6	40380712	T	C	T	C	-1.30693	-0.000277595	0.3107	0.332291	FALSE	FALSE	FALSE	ukb-a-63	0.000386183	337159	0.472253	7.60901e-06	0.291994	1331	Brain_age_gap	TRUE	0.0148504	1.53251e-06	TRUE	1.03723e-05
rs9878089	3	7965744	G	A	G	A	-1.26464	0.000378376	0.4621	0.433441	FALSE	FALSE	FALSE	ukb-a-63	0.000366223	337159	0.301518	3.67853e-06	0.273213	1331	Brain_age_gap	TRUE	0.0158657	3.16608e-06	TRUE	5.60137e-06
rs10490016	2	234875139	C	T	C	T	-2.81082	0.000287516	0.05297	0.0545924	FALSE	FALSE	FALSE	ukb-a-75	0.000427398	337159	0.501131	3.88386e-06	0.608733	1331	Brain_age_gap	TRUE	0.0157898	1.34223e-06	TRUE	5.30537e-06
rs16863620	3	188536690	A	G	A	G	-1.57222	-5.01795e-05	0.1882	0.176556	FALSE	FALSE	FALSE	ukb-a-75	0.000253482	337159	0.843076	8.14224e-06	0.352405	1331	Brain_age_gap	TRUE	0.0147558	1.16232e-07	TRUE	9.5315e-06
rs17178441	6	29708466	T	C	T	C	-2.68141	-0.000252708	0.05334	0.0378664	FALSE	FALSE	FALSE	ukb-a-75	0.000506597	337159	0.617897	8.57525e-06	0.602524	1331	Brain_age_gap	TRUE	0.0146835	7.38041e-07	TRUE	1.09411e-05
rs182456433	14	74307398	T	C	T	C	2.85993	0.000123142	0.05409	0.051652	FALSE	FALSE	FALSE	ukb-a-75	0.000438468	337159	0.778829	2.83971e-06	0.610825	1331	Brain_age_gap	TRUE	0.0162274	2.3394e-07	TRUE	3.47072e-06
rs1999999	1	240714262	T	G	T	G	-1.82443	0.000373525	0.1405	0.139048	FALSE	FALSE	FALSE	ukb-a-75	0.000285687	337159	0.191056	6.69697e-06	0.40515	1331	Brain_age_gap	TRUE	0.0150287	5.07019e-06	TRUE	1.08589e-05
rs35633	16	23704005	T	C	T	C	1.43766	-2.03678e-06	0.2213	0.2092	FALSE	FALSE	FALSE	ukb-a-75	0.000237765	337159	0.993165	9.87947e-06	0.325278	1331	Brain_age_gap	TRUE	0.0144858	2.17651e-10	TRUE	1.09158e-05
rs4365591	3	72021775	C	T	C	T	-2.15224	0.000218857	0.08565	0.0958188	FALSE	FALSE	FALSE	ukb-a-75	0.000328398	337159	0.505132	9.22206e-06	0.485322	1331	Brain_age_gap	TRUE	0.0145819	1.31731e-06	TRUE	1.23285e-05
rs7110255	11	4784113	A	C	A	C	1.41416	1.02906e-05	0.2412	0.250142	FALSE	FALSE	FALSE	ukb-a-75	0.000223014	337159	0.963196	8.33539e-06	0.317334	1331	Brain_age_gap	TRUE	0.0147231	6.31517e-09	TRUE	9.33328e-06
rs7558967	2	174111412	T	C	T	C	-2.24042	-0.000737106	0.09316	0.0983129	FALSE	FALSE	FALSE	ukb-a-75	0.000324184	337159	0.0229826	2.05553e-06	0.471878	1331	Brain_age_gap	TRUE	0.016679	1.53334e-05	TRUE	4.62598e-06
rs78364213	8	112683091	A	G	A	G	2.31826	0.000109104	0.07325	0.0738718	FALSE	FALSE	FALSE	ukb-a-75	0.000368999	337159	0.767478	8.3057e-06	0.520121	1331	Brain_age_gap	TRUE	0.0147281	2.59298e-07	TRUE	9.99886e-06
rs985145	6	40380712	T	C	T	C	-1.30693	-0.000149714	0.3107	0.332291	FALSE	FALSE	FALSE	ukb-a-75	0.000205633	337159	0.466577	7.60901e-06	0.291994	1331	Brain_age_gap	TRUE	0.0148504	1.57219e-06	TRUE	1.04001e-05
rs9878089	3	7965744	G	A	G	A	-1.26464	0.000167476	0.4621	0.433441	FALSE	FALSE	FALSE	ukb-a-75	0.000195005	337159	0.390436	3.67853e-06	0.273213	1331	Brain_age_gap	TRUE	0.0158657	2.18766e-06	TRUE	5.31827e-06
rs10490016	2	234875139	C	T	C	T	-2.81082	0.000516556	0.05297	0.054374	FALSE	FALSE	FALSE	ukb-b-11590	0.000691256	461880	0.450001	3.88386e-06	0.608733	1331	Brain_age_gap	TRUE	0.0157898	1.20901e-06	TRUE	5.19152e-06
rs16863620	3	188536690	A	G	A	G	-1.57222	0.000541716	0.1882	0.17879	FALSE	FALSE	FALSE	ukb-b-11590	0.000406293	461880	0.18	8.14224e-06	0.352405	1331	Brain_age_gap	TRUE	0.0147558	3.84889e-06	TRUE	1.23735e-05
rs17178441	6	29708466	T	C	T	C	-2.68141	0.00254794	0.05334	0.037958	FALSE	FALSE	FALSE	ukb-b-11590	0.000814701	461880	0.00179999	8.57525e-06	0.602524	1331	Brain_age_gap	TRUE	0.0146835	2.11761e-05	TRUE	2.00959e-05
rs182456433	14	74307398	T	C	T	C	2.85993	0.000234447	0.05409	0.05313	FALSE	FALSE	FALSE	ukb-b-11590	0.000699128	461880	0.74	2.83971e-06	0.610825	1331	Brain_age_gap	TRUE	0.0162274	2.43472e-07	TRUE	3.43553e-06
rs1999999	1	240714262	T	G	T	G	-1.82443	-0.000456251	0.1405	0.137392	FALSE	FALSE	FALSE	ukb-b-11590	0.000460765	461880	0.32	6.69697e-06	0.40515	1331	Brain_age_gap	TRUE	0.0150287	2.12286e-06	TRUE	9.39823e-06
rs35633	16	23704005	T	C	T	C	1.43766	8.65663e-05	0.2213	0.20938	FALSE	FALSE	FALSE	ukb-b-11590	0.00038305	461880	0.82	9.87947e-06	0.325278	1331	Brain_age_gap	TRUE	0.0144858	1.10576e-07	TRUE	1.13896e-05
rs4365591	3	72021775	C	T	C	T	-2.15224	0.000326666	0.08565	0.096416	FALSE	FALSE	FALSE	ukb-b-11590	0.000527934	461880	0.54	9.22206e-06	0.485322	1331	Brain_age_gap	TRUE	0.0145819	8.28936e-07	TRUE	1.17245e-05
rs7110255	11	4784113	A	C	A	C	1.41416	-0.000256215	0.2412	0.254537	FALSE	FALSE	FALSE	ukb-b-11590	0.000356591	461880	0.47	8.33539e-06	0.317334	1331	Brain_age_gap	TRUE	0.0147231	1.11774e-06	TRUE	1.08831e-05
rs7558967	2	174111412	T	C	T	C	-2.24042	0.000124399	0.09316	0.101786	FALSE	FALSE	FALSE	ukb-b-11590	0.000514028	461880	0.81	2.05553e-06	0.471878	1331	Brain_age_gap	TRUE	0.016679	1.26804e-07	TRUE	2.44052e-06
rs78364213	8	112683091	A	G	A	G	2.31826	-0.00054086	0.07325	0.073985	FALSE	FALSE	FALSE	ukb-b-11590	0.000593929	461880	0.36	8.3057e-06	0.520121	1331	Brain_age_gap	TRUE	0.0147281	1.79545e-06	TRUE	1.13711e-05
rs985145	6	40380712	T	C	T	C	-1.30693	-0.000381487	0.3107	0.332518	FALSE	FALSE	FALSE	ukb-b-11590	0.00033141	461880	0.25	7.60901e-06	0.291994	1331	Brain_age_gap	TRUE	0.0148504	2.8688e-06	TRUE	1.10766e-05
rs9878089	3	7965744	G	A	G	A	-1.26464	0.000389076	0.4621	0.435202	FALSE	FALSE	FALSE	ukb-b-11590	0.000313632	461880	0.21	3.67853e-06	0.273213	1331	Brain_age_gap	TRUE	0.0158657	3.33196e-06	TRUE	5.58193e-06
rs16863620	3	188536690	A	G	A	G	-1.57222	-0.000215656	0.1882	0.178815	FALSE	FALSE	FALSE	ukb-b-13806	0.000216744	462933	0.32	8.14224e-06	0.352405	1331	Brain_age_gap	TRUE	0.0147558	2.13851e-06	TRUE	1.13826e-05
rs1999999	1	240714262	T	G	T	G	-1.82443	0.000221869	0.1405	0.137421	FALSE	FALSE	FALSE	ukb-b-13806	0.00024582	462933	0.37	6.69697e-06	0.40515	1331	Brain_age_gap	TRUE	0.0150287	1.75971e-06	TRUE	9.19285e-06
rs35633	16	23704005	T	C	T	C	1.43766	-0.000106399	0.2213	0.209386	FALSE	FALSE	FALSE	ukb-b-13806	0.000204382	462933	0.6	9.87947e-06	0.325278	1331	Brain_age_gap	TRUE	0.0144858	5.85428e-07	TRUE	1.22423e-05
rs7110255	11	4784113	A	C	A	C	1.41416	-8.67865e-06	0.2412	0.254543	FALSE	FALSE	FALSE	ukb-b-13806	0.000190248	462933	0.96	8.33539e-06	0.317334	1331	Brain_age_gap	TRUE	0.0147231	4.49519e-09	TRUE	9.2121e-06
rs985145	6	40380712	T	C	T	C	-1.30693	-0.000231997	0.3107	0.332481	FALSE	FALSE	FALSE	ukb-b-13806	0.000176838	462933	0.19	7.60901e-06	0.291994	1331	Brain_age_gap	TRUE	0.0148504	3.71788e-06	TRUE	1.15191e-05
rs9878089	3	7965744	G	A	G	A	-1.26464	0.000127155	0.4621	0.435181	FALSE	FALSE	FALSE	ukb-b-13806	0.000167336	462933	0.450001	3.67853e-06	0.273213	1331	Brain_age_gap	TRUE	0.0158657	1.2473e-06	TRUE	4.9373e-06
rs10490016	2	234875139	C	T	C	T	-2.81082	0.00052988	0.05297	0.054388	FALSE	FALSE	FALSE	ukb-b-15829	0.000687199	462933	0.44	3.88386e-06	0.608733	1331	Brain_age_gap	TRUE	0.0157898	1.28432e-06	TRUE	5.22156e-06
rs16863620	3	188536690	A	G	A	G	-1.57222	0.000535561	0.1882	0.178815	FALSE	FALSE	FALSE	ukb-b-15829	0.000403912	462933	0.18	8.14224e-06	0.352405	1331	Brain_age_gap	TRUE	0.0147558	3.79775e-06	TRUE	1.23458e-05
rs17178441	6	29708466	T	C	T	C	-2.68141	0.00257941	0.05334	0.037952	FALSE	FALSE	FALSE	ukb-b-15829	0.000810085	462933	0.0015	8.57525e-06	0.602524	1331	Brain_age_gap	TRUE	0.0146835	2.19005e-05	TRUE	2.03518e-05
rs182456433	14	74307398	T	C	T	C	2.85993	0.00027929	0.05409	0.053118	FALSE	FALSE	FALSE	ukb-b-15829	0.000695238	462933	0.69	2.83971e-06	0.610825	1331	Brain_age_gap	TRUE	0.0162274	3.486e-07	TRUE	3.49447e-06
rs1999999	1	240714262	T	G	T	G	-1.82443	-0.000351491	0.1405	0.137421	FALSE	FALSE	FALSE	ukb-b-15829	0.000458079	462933	0.44	6.69697e-06	0.40515	1331	Brain_age_gap	TRUE	0.0150287	1.27184e-06	TRUE	8.88906e-06
rs35633	16	23704005	T	C	T	C	1.43766	0.000258019	0.2213	0.209386	FALSE	FALSE	FALSE	ukb-b-15829	0.000380874	462933	0.5	9.87947e-06	0.325278	1331	Brain_age_gap	TRUE	0.0144858	9.91343e-07	TRUE	1.27216e-05
rs4365591	3	72021775	C	T	C	T	-2.15224	0.000321434	0.08565	0.096396	FALSE	FALSE	FALSE	ukb-b-15829	0.000524944	462933	0.54	9.22206e-06	0.485322	1331	Brain_age_gap	TRUE	0.0145819	8.09918e-07	TRUE	1.17032e-05
rs7110255	11	4784113	A	C	A	C	1.41416	-0.000302426	0.2412	0.254543	FALSE	FALSE	FALSE	ukb-b-15829	0.000354543	462933	0.39	8.33539e-06	0.317334	1331	Brain_age_gap	TRUE	0.0147231	1.57175e-06	TRUE	1.12466e-05
rs7558967	2	174111412	T	C	T	C	-2.24042	4.7566e-05	0.09316	0.101784	FALSE	FALSE	FALSE	ukb-b-15829	0.000511074	462933	0.93	2.05553e-06	0.471878	1331	Brain_age_gap	TRUE	0.016679	1.87115e-08	TRUE	2.3465e-06
rs78364213	8	112683091	A	G	A	G	2.31826	-0.000606086	0.07325	0.073971	FALSE	FALSE	FALSE	ukb-b-15829	0.000590575	462933	0.3	8.3057e-06	0.520121	1331	Brain_age_gap	TRUE	0.0147281	2.2751e-06	TRUE	1.16951e-05
rs985145	6	40380712	T	C	T	C	-1.30693	-0.000412003	0.3107	0.332481	FALSE	FALSE	FALSE	ukb-b-15829	0.000329507	462933	0.21	7.60901e-06	0.291994	1331	Brain_age_gap	TRUE	0.0148504	3.37718e-06	TRUE	1.13461e-05
rs9878089	3	7965744	G	A	G	A	-1.26464	0.000332715	0.4621	0.435181	FALSE	FALSE	FALSE	ukb-b-15829	0.000311837	462933	0.29	3.67853e-06	0.273213	1331	Brain_age_gap	TRUE	0.0158657	2.45908e-06	TRUE	5.33887e-06
rs7110255	11	4784113	A	C	A	C	1.41416	-5.66344e-05	0.2412	0.254542	FALSE	FALSE	FALSE	ukb-b-4929	0.000133323	463010	0.67	8.33539e-06	0.317334	1331	Brain_age_gap	TRUE	0.0147231	3.89728e-07	TRUE	1.01193e-05
rs985145	6	40380712	T	C	T	C	-1.30693	-2.40915e-05	0.3107	0.332483	FALSE	FALSE	FALSE	ukb-b-4929	0.00012392	463010	0.85	7.60901e-06	0.291994	1331	Brain_age_gap	TRUE	0.0148504	8.16312e-08	TRUE	8.73754e-06
rs9878089	3	7965744	G	A	G	A	-1.26464	-0.000148211	0.4621	0.435188	FALSE	FALSE	FALSE	ukb-b-4929	0.000117264	463010	0.21	3.67853e-06	0.273213	1331	Brain_age_gap	TRUE	0.0158657	3.45018e-06	TRUE	5.61252e-06
rs16863620	3	188536690	A	G	A	G	-1.57222	3.73322e-05	0.1882	0.178815	FALSE	FALSE	FALSE	ukb-b-6358	0.000309781	462933	0.9	8.14224e-06	0.352405	1331	Brain_age_gap	TRUE	0.0147558	3.13719e-08	TRUE	9.17054e-06
rs1999999	1	240714262	T	G	T	G	-1.82443	0.000104178	0.1405	0.137421	FALSE	FALSE	FALSE	ukb-b-6358	0.000351343	462933	0.77	6.69697e-06	0.40515	1331	Brain_age_gap	TRUE	0.0150287	1.89921e-07	TRUE	7.90465e-06
rs35633	16	23704005	T	C	T	C	1.43766	5.1574e-05	0.2213	0.209386	FALSE	FALSE	FALSE	ukb-b-6358	0.00029211	462933	0.86	9.87947e-06	0.325278	1331	Brain_age_gap	TRUE	0.0144858	6.73368e-08	TRUE	1.12505e-05
rs4365591	3	72021775	C	T	C	T	-2.15224	0.000710796	0.08565	0.096396	FALSE	FALSE	FALSE	ukb-b-6358	0.000402607	462933	0.0769999	9.22206e-06	0.485322	1331	Brain_age_gap	TRUE	0.0145819	6.73299e-06	TRUE	1.55063e-05
rs7110255	11	4784113	A	C	A	C	1.41416	-0.000172742	0.2412	0.254543	FALSE	FALSE	FALSE	ukb-b-6358	0.000271915	462933	0.53	8.33539e-06	0.317334	1331	Brain_age_gap	TRUE	0.0147231	8.71792e-07	TRUE	1.06593e-05
rs7558967	2	174111412	T	C	T	C	-2.24042	-0.000697477	0.09316	0.101784	FALSE	FALSE	FALSE	ukb-b-6358	0.000391992	462933	0.0749998	2.05553e-06	0.471878	1331	Brain_age_gap	TRUE	0.016679	6.8389e-06	TRUE	3.64174e-06
rs78364213	8	112683091	A	G	A	G	2.31826	-0.000439561	0.07325	0.073971	FALSE	FALSE	FALSE	ukb-b-6358	0.000452931	462933	0.33	8.3057e-06	0.520121	1331	Brain_age_gap	TRUE	0.0147281	2.0345e-06	TRUE	1.15359e-05
rs985145	6	40380712	T	C	T	C	-1.30693	0.000207285	0.3107	0.332481	FALSE	FALSE	FALSE	ukb-b-6358	0.000252749	462933	0.41	7.60901e-06	0.291994	1331	Brain_age_gap	TRUE	0.0148504	1.45291e-06	TRUE	1.02042e-05
rs9878089	3	7965744	G	A	G	A	-1.26464	-4.49025e-05	0.4621	0.435181	FALSE	FALSE	FALSE	ukb-b-6358	0.000239164	462933	0.85	3.67853e-06	0.273213	1331	Brain_age_gap	TRUE	0.0158657	7.61436e-08	TRUE	4.26496e-06
rs10490016	2	234875139	C	T	C	T	-2.81082	-0.000616113	0.05297	0.054374	FALSE	FALSE	FALSE	ukb-b-8714	0.000566832	461880	0.28	3.88386e-06	0.608733	1331	Brain_age_gap	TRUE	0.0157898	2.5579e-06	TRUE	5.65999e-06
rs16863620	3	188536690	A	G	A	G	-1.57222	8.24367e-05	0.1882	0.17879	FALSE	FALSE	FALSE	ukb-b-8714	0.000333147	461880	0.8	8.14224e-06	0.352405	1331	Brain_age_gap	TRUE	0.0147558	1.32569e-07	TRUE	9.46528e-06
rs182456433	14	74307398	T	C	T	C	2.85993	-0.000279456	0.05409	0.05313	FALSE	FALSE	FALSE	ukb-b-8714	0.00057324	461880	0.630001	2.83971e-06	0.610825	1331	Brain_age_gap	TRUE	0.0162274	5.14549e-07	TRUE	3.57365e-06
rs1999999	1	240714262	T	G	T	G	-1.82443	-2.33461e-05	0.1405	0.137392	FALSE	FALSE	FALSE	ukb-b-8714	0.000377829	461880	0.95	6.69697e-06	0.40515	1331	Brain_age_gap	TRUE	0.0150287	8.26629e-09	TRUE	7.45431e-06
rs35633	16	23704005	T	C	T	C	1.43766	-5.70473e-05	0.2213	0.20938	FALSE	FALSE	FALSE	ukb-b-8714	0.000314086	461880	0.86	9.87947e-06	0.325278	1331	Brain_age_gap	TRUE	0.0144858	7.14243e-08	TRUE	1.12659e-05
rs4365591	3	72021775	C	T	C	T	-2.15224	0.000582777	0.08565	0.096416	FALSE	FALSE	FALSE	ukb-b-8714	0.000432889	461880	0.18	9.22206e-06	0.485322	1331	Brain_age_gap	TRUE	0.0145819	3.92394e-06	TRUE	1.40105e-05
rs7110255	11	4784113	A	C	A	C	1.41416	-0.000131943	0.2412	0.254537	FALSE	FALSE	FALSE	ukb-b-8714	0.000292391	461880	0.649999	8.33539e-06	0.317334	1331	Brain_age_gap	TRUE	0.0147231	4.40877e-07	TRUE	1.01878e-05
rs7558967	2	174111412	T	C	T	C	-2.24042	-0.000564185	0.09316	0.101786	FALSE	FALSE	FALSE	ukb-b-8714	0.000421504	461880	0.18	2.05553e-06	0.471878	1331	Brain_age_gap	TRUE	0.016679	3.87892e-06	TRUE	3.25042e-06
rs78364213	8	112683091	A	G	A	G	2.31826	-0.000116524	0.07325	0.073985	FALSE	FALSE	FALSE	ukb-b-8714	0.000486988	461880	0.81	8.3057e-06	0.520121	1331	Brain_age_gap	TRUE	0.0147281	1.23956e-07	TRUE	9.63271e-06
rs985145	6	40380712	T	C	T	C	-1.30693	0.000322501	0.3107	0.332518	FALSE	FALSE	FALSE	ukb-b-8714	0.000271776	461880	0.24	7.60901e-06	0.291994	1331	Brain_age_gap	TRUE	0.0148504	3.04868e-06	TRUE	1.1174e-05
rs9878089	3	7965744	G	A	G	A	-1.26464	-8.93669e-05	0.4621	0.435202	FALSE	FALSE	FALSE	ukb-b-8714	0.000257168	461880	0.73	3.67853e-06	0.273213	1331	Brain_age_gap	TRUE	0.0158657	2.61452e-07	TRUE	4.44408e-06
rs10490016	2	234875139	C	T	C	T	-2.81082	0.000617815	0.05297	0.0548468	FALSE	FALSE	FALSE	ukb-d-I9_CHD	0.00085194	361194	0.468338	3.88386e-06	0.608733	1331	Brain_age_gap	TRUE	0.0157898	1.456e-06	TRUE	5.33459e-06
rs16863620	3	188536690	A	G	A	G	-1.57222	-0.000693972	0.1882	0.176585	FALSE	FALSE	FALSE	ukb-d-I9_CHD	0.000505635	361194	0.169916	8.14224e-06	0.352405	1331	Brain_age_gap	TRUE	0.0147558	5.21518e-06	TRUE	1.31588e-05
rs17178441	6	29708466	T	C	T	C	-2.68141	0.000995243	0.05334	0.0377227	FALSE	FALSE	FALSE	ukb-d-I9_CHD	0.00101182	361194	0.325303	8.57525e-06	0.602524	1331	Brain_age_gap	TRUE	0.0146835	2.67863e-06	TRUE	1.2426e-05
rs182456433	14	74307398	T	C	T	C	2.85993	0.000506719	0.05409	0.0518207	FALSE	FALSE	FALSE	ukb-d-I9_CHD	0.000875322	361194	0.562661	2.83971e-06	0.610825	1331	Brain_age_gap	TRUE	0.0162274	9.27812e-07	TRUE	3.76489e-06
rs1999999	1	240714262	T	G	T	G	-1.82443	0.00042696	0.1405	0.137409	FALSE	FALSE	FALSE	ukb-d-I9_CHD	0.000569773	361194	0.453646	6.69697e-06	0.40515	1331	Brain_age_gap	TRUE	0.0150287	1.55465e-06	TRUE	9.14548e-06
rs35633	16	23704005	T	C	T	C	1.43766	0.000573691	0.2213	0.209565	FALSE	FALSE	FALSE	ukb-d-I9_CHD	0.000474242	361194	0.226394	9.87947e-06	0.325278	1331	Brain_age_gap	TRUE	0.0144858	4.0515e-06	TRUE	1.51785e-05
rs4365591	3	72021775	C	T	C	T	-2.15224	-0.000227982	0.08565	0.0962866	FALSE	FALSE	FALSE	ukb-d-I9_CHD	0.000653844	361194	0.727329	9.22206e-06	0.485322	1331	Brain_age_gap	TRUE	0.0145819	3.366e-07	TRUE	1.11842e-05
rs7110255	11	4784113	A	C	A	C	1.41416	-0.00048857	0.2412	0.250418	FALSE	FALSE	FALSE	ukb-d-I9_CHD	0.000444549	361194	0.271759	8.33539e-06	0.317334	1331	Brain_age_gap	TRUE	0.0147231	3.34407e-06	TRUE	1.24805e-05
rs7558967	2	174111412	T	C	T	C	-2.24042	0.000514353	0.09316	0.0990657	FALSE	FALSE	FALSE	ukb-d-I9_CHD	0.000644516	361194	0.424845	2.05553e-06	0.471878	1331	Brain_age_gap	TRUE	0.016679	1.76326e-06	TRUE	2.92801e-06
rs78364213	8	112683091	A	G	A	G	2.31826	0.000194998	0.07325	0.0742153	FALSE	FALSE	FALSE	ukb-d-I9_CHD	0.000734505	361194	0.790639	8.3057e-06	0.520121	1331	Brain_age_gap	TRUE	0.0147281	1.95134e-07	TRUE	9.85963e-06
rs985145	6	40380712	T	C	T	C	-1.30693	-0.000177039	0.3107	0.33239	FALSE	FALSE	FALSE	ukb-d-I9_CHD	0.000410201	361194	0.666038	7.60901e-06	0.291994	1331	Brain_age_gap	TRUE	0.0148504	5.15711e-07	TRUE	9.47824e-06
rs9878089	3	7965744	G	A	G	A	-1.26464	0.000370493	0.4621	0.433876	FALSE	FALSE	FALSE	ukb-d-I9_CHD	0.000388746	361194	0.340568	3.67853e-06	0.273213	1331	Brain_age_gap	TRUE	0.0158657	2.51472e-06	TRUE	5.40201e-06
rs10490016	2	234875139	C	T	C	T	-2.81082	0.000253552	0.05297	0.0548468	FALSE	FALSE	FALSE	ukb-d-I9_MI_STRICT	0.000713052	361194	0.722149	3.88386e-06	0.608733	1331	Brain_age_gap	TRUE	0.0157898	3.50069e-07	TRUE	4.79529e-06
rs16863620	3	188536690	A	G	A	G	-1.57222	8.32833e-05	0.1882	0.176585	FALSE	FALSE	FALSE	ukb-d-I9_MI_STRICT	0.000423204	361194	0.84399	8.14224e-06	0.352405	1331	Brain_age_gap	TRUE	0.0147558	1.07221e-07	TRUE	9.4844e-06
rs17178441	6	29708466	T	C	T	C	-2.68141	0.000834342	0.05334	0.0377227	FALSE	FALSE	FALSE	ukb-d-I9_MI_STRICT	0.000846865	361194	0.32452	8.57525e-06	0.602524	1331	Brain_age_gap	TRUE	0.0146835	2.68733e-06	TRUE	1.24315e-05
rs182456433	14	74307398	T	C	T	C	2.85993	0.000187345	0.05409	0.0518207	FALSE	FALSE	FALSE	ukb-d-I9_MI_STRICT	0.000732623	361194	0.798168	2.83971e-06	0.610825	1331	Brain_age_gap	TRUE	0.0162274	1.81044e-07	TRUE	3.42528e-06
rs1999999	1	240714262	T	G	T	G	-1.82443	8.99846e-06	0.1405	0.137409	FALSE	FALSE	FALSE	ukb-d-I9_MI_STRICT	0.000476886	361194	0.984945	6.69697e-06	0.40515	1331	Brain_age_gap	TRUE	0.0150287	9.85755e-10	TRUE	7.4412e-06
rs35633	16	23704005	T	C	T	C	1.43766	0.000488027	0.2213	0.209565	FALSE	FALSE	FALSE	ukb-d-I9_MI_STRICT	0.000396929	361194	0.218882	9.87947e-06	0.325278	1331	Brain_age_gap	TRUE	0.0144858	4.18526e-06	TRUE	1.52613e-05
rs4365591	3	72021775	C	T	C	T	-2.15224	3.61785e-05	0.08565	0.0962866	FALSE	FALSE	FALSE	ukb-d-I9_MI_STRICT	0.000547251	361194	0.947291	9.22206e-06	0.485322	1331	Brain_age_gap	TRUE	0.0145819	1.21001e-08	TRUE	1.03363e-05
rs7110255	11	4784113	A	C	A	C	1.41416	-0.000489639	0.2412	0.250418	FALSE	FALSE	FALSE	ukb-d-I9_MI_STRICT	0.000372076	361194	0.188186	8.33539e-06	0.317334	1331	Brain_age_gap	TRUE	0.0147231	4.79456e-06	TRUE	1.32527e-05
rs7558967	2	174111412	T	C	T	C	-2.24042	0.000639561	0.09316	0.0990657	FALSE	FALSE	FALSE	ukb-d-I9_MI_STRICT	0.000539443	361194	0.235783	2.05553e-06	0.471878	1331	Brain_age_gap	TRUE	0.016679	3.89164e-06	TRUE	3.28174e-06
rs78364213	8	112683091	A	G	A	G	2.31826	-0.000126051	0.07325	0.0742153	FALSE	FALSE	FALSE	ukb-d-I9_MI_STRICT	0.000614762	361194	0.837541	8.3057e-06	0.520121	1331	Brain_age_gap	TRUE	0.0147281	1.16397e-07	TRUE	9.69406e-06
rs985145	6	40380712	T	C	T	C	-1.30693	0.000151571	0.3107	0.33239	FALSE	FALSE	FALSE	ukb-d-I9_MI_STRICT	0.000343328	361194	0.658869	7.60901e-06	0.291994	1331	Brain_age_gap	TRUE	0.0148504	5.39604e-07	TRUE	9.50456e-06
rs9878089	3	7965744	G	A	G	A	-1.26464	2.00435e-05	0.4621	0.433876	FALSE	FALSE	FALSE	ukb-d-I9_MI_STRICT	0.000325371	361194	0.95088	3.67853e-06	0.273213	1331	Brain_age_gap	TRUE	0.0158657	1.05063e-08	TRUE	4.17466e-06
rs10490016	2	234875139	C	T	C	T	-2.81082	0.000229979	0.05297	0.0548468	FALSE	FALSE	FALSE	ukb-d-I9_STR_EXH	0.000495107	361194	0.642287	3.88386e-06	0.608733	1331	Brain_age_gap	TRUE	0.0157898	5.97365e-07	TRUE	4.94853e-06
rs16863620	3	188536690	A	G	A	G	-1.57222	-0.000492155	0.1882	0.176585	FALSE	FALSE	FALSE	ukb-d-I9_STR_EXH	0.00029385	361194	0.0939637	8.14224e-06	0.352405	1331	Brain_age_gap	TRUE	0.0147558	7.76624e-06	TRUE	1.43037e-05
rs17178441	6	29708466	T	C	T	C	-2.68141	0.000594968	0.05334	0.0377227	FALSE	FALSE	FALSE	ukb-d-I9_STR_EXH	0.00058802	361194	0.311627	8.57525e-06	0.602524	1331	Brain_age_gap	TRUE	0.0146835	2.83442e-06	TRUE	1.25235e-05
rs182456433	14	74307398	T	C	T	C	2.85993	-0.000485126	0.05409	0.0518207	FALSE	FALSE	FALSE	ukb-d-I9_STR_EXH	0.000508695	361194	0.340252	2.83971e-06	0.610825	1331	Brain_age_gap	TRUE	0.0162274	2.518e-06	TRUE	4.19916e-06
rs1999999	1	240714262	T	G	T	G	-1.82443	9.0782e-05	0.1405	0.137409	FALSE	FALSE	FALSE	ukb-d-I9_STR_EXH	0.000331125	361194	0.78396	6.69697e-06	0.40515	1331	Brain_age_gap	TRUE	0.0150287	2.08103e-07	TRUE	7.99902e-06
rs35633	16	23704005	T	C	T	C	1.43766	-0.000222659	0.2213	0.209565	FALSE	FALSE	FALSE	ukb-d-I9_STR_EXH	0.000275607	361194	0.419158	9.87947e-06	0.325278	1331	Brain_age_gap	TRUE	0.0144858	1.80701e-06	TRUE	1.35888e-05
rs4365591	3	72021775	C	T	C	T	-2.15224	0.00010171	0.08565	0.0962866	FALSE	FALSE	FALSE	ukb-d-I9_STR_EXH	0.000379983	361194	0.788953	9.22206e-06	0.485322	1331	Brain_age_gap	TRUE	0.0145819	1.98363e-07	TRUE	1.09346e-05
rs7110255	11	4784113	A	C	A	C	1.41416	-0.000258344	0.2412	0.250418	FALSE	FALSE	FALSE	ukb-d-I9_STR_EXH	0.000258351	361194	0.317324	8.33539e-06	0.317334	1331	Brain_age_gap	TRUE	0.0147231	2.76845e-06	TRUE	1.21424e-05
rs7558967	2	174111412	T	C	T	C	-2.24042	0.000392199	0.09316	0.0990657	FALSE	FALSE	FALSE	ukb-d-I9_STR_EXH	0.000374562	361194	0.29506	2.05553e-06	0.471878	1331	Brain_age_gap	TRUE	0.016679	3.03547e-06	TRUE	3.15085e-06
rs78364213	8	112683091	A	G	A	G	2.31826	0.000775734	0.07325	0.0742153	FALSE	FALSE	FALSE	ukb-d-I9_STR_EXH	0.000426857	361194	0.0691704	8.3057e-06	0.520121	1331	Brain_age_gap	TRUE	0.0147281	9.14363e-06	TRUE	1.51632e-05
rs985145	6	40380712	T	C	T	C	-1.30693	0.000142375	0.3107	0.33239	FALSE	FALSE	FALSE	ukb-d-I9_STR_EXH	0.000238389	361194	0.550351	7.60901e-06	0.291994	1331	Brain_age_gap	TRUE	0.0148504	9.87544e-07	TRUE	9.92869e-06
rs9878089	3	7965744	G	A	G	A	-1.26464	5.80656e-05	0.4621	0.433876	FALSE	FALSE	FALSE	ukb-d-I9_STR_EXH	0.000225921	361194	0.797166	3.67853e-06	0.273213	1331	Brain_age_gap	TRUE	0.0158657	1.82889e-07	TRUE	4.41838e-06
rs11635947	15	26656667	G	C	G	C	1.86479	0.001357	0.2757	0.332885	FALSE	TRUE	FALSE	ebi-a-GCST003116	0.0101317	42457	0.893453	1.23784e-06	0.384533	1331	Artery_age_gap	TRUE	0.0173879	4.22538e-07	TRUE	2.1768e-06
rs13104420	4	37946063	G	A	G	A	-3.0543	0.03233	0.07551	0.058261	FALSE	FALSE	FALSE	ebi-a-GCST003116	0.0218146	42457	0.138331	3.44959e-06	0.657962	1331	Artery_age_gap	TRUE	0.0159555	5.17328e-05	TRUE	1.71551e-05
rs1863622	3	186396616	C	T	C	T	1.89791	0.003677	0.2179	0.263724	FALSE	FALSE	FALSE	ebi-a-GCST003116	0.010475	42457	0.725568	2.36286e-06	0.402132	1331	Artery_age_gap	TRUE	0.0164843	2.90235e-06	TRUE	4.83722e-06
rs56106813	7	103451593	T	C	T	C	-3.34242	-0.003109	0.06649	0.10005	FALSE	FALSE	FALSE	ebi-a-GCST003116	0.0150352	42457	0.83618	2.77606e-06	0.713166	1331	Artery_age_gap	TRUE	0.0162591	1.00715e-06	TRUE	5.00118e-06
rs5758876	22	43099055	G	C	G	C	-1.68756	0.00147	0.417	0.400614	FALSE	TRUE	FALSE	ebi-a-GCST003116	0.0098395	42457	0.88124	1.00886e-06	0.345111	1331	Artery_age_gap	TRUE	0.0176738	5.25726e-07	TRUE	1.81483e-06
rs73041834	6	169599703	T	A	T	A	-3.3995	0.003783	0.09617	0.094035	FALSE	TRUE	FALSE	ebi-a-GCST003116	0.0161236	42457	0.8145	6.46898e-09	0.585702	1331	Artery_age_gap	TRUE	0.0247219	1.29664e-06	TRUE	1.61782e-08
rs7897195	10	59283305	T	C	T	C	1.63901	0.000259	0.3418	0.359552	FALSE	FALSE	FALSE	ebi-a-GCST003116	0.0097602	42457	0.97883	3.66268e-06	0.354023	1331	Artery_age_gap	TRUE	0.0158717	1.65864e-08	TRUE	5.6146e-06
rs79211442	6	22879454	C	T	C	T	-2.57794	-0.01253	0.09767	0.090843	FALSE	FALSE	FALSE	ebi-a-GCST003116	0.0172381	42457	0.467301	7.40596e-06	0.575217	1331	Artery_age_gap	TRUE	0.0148882	1.24448e-05	TRUE	1.9209e-05
rs7951354	11	23277759	A	G	A	G	-1.8425	0.009302	0.2122	0.200385	FALSE	FALSE	FALSE	ebi-a-GCST003116	0.0120251	42457	0.439198	9.33458e-06	0.415724	1331	Artery_age_gap	TRUE	0.014565	1.40942e-05	TRUE	2.47281e-05
rs8059298	16	88332479	T	C	T	C	1.57292	-0.018482	0.3749	0.377054	FALSE	FALSE	FALSE	ebi-a-GCST003116	0.0102067	42457	0.0701746	9.02476e-06	0.354316	1331	Artery_age_gap	TRUE	0.0146121	7.72262e-05	TRUE	5.26067e-05
rs1863622	3	186396616	C	T	C	T	1.89791	0	0.2179		FALSE	FALSE	FALSE	ebi-a-GCST005047	0.0155404	12171	0.84	2.36286e-06	0.402132	1331	Artery_age_gap	TRUE	0.0164843	0	TRUE	7.92141e-06
rs7897195	10	59283305	T	C	T	C	1.63901	0.00995033	0.3418		FALSE	FALSE	FALSE	ebi-a-GCST005047	0.0153842	12171	0.709999	3.66268e-06	0.354023	1331	Artery_age_gap	TRUE	0.0158717	3.4376e-05	TRUE	2.91865e-05
rs7951354	11	23277759	A	G	A	G	-1.8425	-0.00995033	0.2122		FALSE	FALSE	FALSE	ebi-a-GCST005047	0.0259042	12171	0.79	9.33458e-06	0.415724	1331	Artery_age_gap	TRUE	0.014565	1.21248e-05	TRUE	4.58224e-05
rs8059298	16	88332479	T	C	T	C	1.57292	0.00995033	0.3749		FALSE	FALSE	FALSE	ebi-a-GCST005047	0.0153842	12171	0.39	9.02476e-06	0.354316	1331	Artery_age_gap	TRUE	0.0146121	3.4376e-05	TRUE	6.3227e-05
rs11635947	15	26656667	G	C	G	C	1.86479	-0.0115	0.2757	0.3461	FALSE	TRUE	FALSE	ebi-a-GCST005838	0.0088	446696	0.1948	1.23784e-06	0.384533	1331	Artery_age_gap	TRUE	0.0173879	3.82313e-06	TRUE	1.98294e-06
rs13104420	4	37946063	G	A	G	A	-3.0543	-0.0111	0.07551	0.0726	FALSE	FALSE	FALSE	ebi-a-GCST005838	0.0176	446696	0.5299	3.44959e-06	0.657962	1331	Artery_age_gap	TRUE	0.0159555	8.90451e-07	TRUE	4.50395e-06
rs1863622	3	186396616	C	T	C	T	1.89791	0.0065	0.2179	0.2636	FALSE	FALSE	FALSE	ebi-a-GCST005838	0.0091	446696	0.4767	2.36286e-06	0.402132	1331	Artery_age_gap	TRUE	0.0164843	1.14218e-06	TRUE	3.17909e-06
rs56106813	7	103451593	T	C	T	C	-3.34242	0.014	0.06649	0.1725	FALSE	FALSE	FALSE	ebi-a-GCST005838	0.0131	446696	0.2841	2.77606e-06	0.713166	1331	Artery_age_gap	TRUE	0.0162591	2.55683e-06	TRUE	4.0844e-06
rs5758876	22	43099055	G	C	G	C	-1.68756	-0.0007	0.417	0.3966	FALSE	TRUE	FALSE	ebi-a-GCST005838	0.0082	446696	0.9346	1.00886e-06	0.345111	1331	Artery_age_gap	TRUE	0.0176738	1.63139e-08	TRUE	1.16414e-06
rs73041834	6	169599703	T	A	T	A	-3.3995	0.012	0.09617	0.102	FALSE	TRUE	FALSE	ebi-a-GCST005838	0.0145	446696	0.4094	6.46898e-09	0.585702	1331	Artery_age_gap	TRUE	0.0247219	1.53326e-06	TRUE	1.03976e-08
rs7897195	10	59283305	T	C	T	C	1.63901	0.0114	0.3418	0.3311	FALSE	FALSE	FALSE	ebi-a-GCST005838	0.0083	446696	0.1696	3.66268e-06	0.354023	1331	Artery_age_gap	TRUE	0.0158717	4.2232e-06	TRUE	5.78928e-06
rs79211442	6	22879454	C	T	C	T	-2.57794	0.0024	0.09767	0.1045	FALSE	FALSE	FALSE	ebi-a-GCST005838	0.0148	446696	0.8713	7.40596e-06	0.575217	1331	Artery_age_gap	TRUE	0.0148882	5.88693e-08	TRUE	8.45514e-06
rs7951354	11	23277759	A	G	A	G	-1.8425	0.0044	0.2122	0.2063	FALSE	FALSE	FALSE	ebi-a-GCST005838	0.011	446696	0.685799	9.33458e-06	0.415724	1331	Artery_age_gap	TRUE	0.014565	3.58187e-07	TRUE	1.12728e-05
rs8059298	16	88332479	T	C	T	C	1.57292	0.0127	0.3749	0.3577	FALSE	FALSE	FALSE	ebi-a-GCST005838	0.0086	446696	0.1407	9.02476e-06	0.354316	1331	Artery_age_gap	TRUE	0.0146121	4.88201e-06	TRUE	1.42626e-05
rs11635947	15	26656667	G	C	G	C	1.86479	-0.0121	0.2757	0.3516	FALSE	TRUE	FALSE	ebi-a-GCST005843	0.0094	440328	0.1994	1.23784e-06	0.384533	1331	Artery_age_gap	TRUE	0.0173879	3.76304e-06	TRUE	1.97843e-06
rs13104420	4	37946063	G	A	G	A	-3.0543	-0.0018	0.07551	0.0723	FALSE	FALSE	FALSE	ebi-a-GCST005843	0.0191	440328	0.9237	3.44959e-06	0.657962	1331	Artery_age_gap	TRUE	0.0159555	2.01699e-08	TRUE	3.91717e-06
rs1863622	3	186396616	C	T	C	T	1.89791	0.0077	0.2179	0.2677	FALSE	FALSE	FALSE	ebi-a-GCST005843	0.0097	440328	0.4253	2.36286e-06	0.402132	1331	Artery_age_gap	TRUE	0.0164843	1.43108e-06	TRUE	3.25311e-06
rs56106813	7	103451593	T	C	T	C	-3.34242	0.0109	0.06649	0.1818	FALSE	FALSE	FALSE	ebi-a-GCST005843	0.0136	440328	0.4253	2.77606e-06	0.713166	1331	Artery_age_gap	TRUE	0.0162591	1.45881e-06	TRUE	3.8157e-06
rs5758876	22	43099055	G	C	G	C	-1.68756	0.002	0.417	0.3957	FALSE	TRUE	FALSE	ebi-a-GCST005843	0.0087	440328	0.8192	1.00886e-06	0.345111	1331	Artery_age_gap	TRUE	0.0176738	1.20018e-07	TRUE	1.2125e-06
rs73041834	6	169599703	T	A	T	A	-3.3995	0.0202	0.09617	0.1002	FALSE	TRUE	FALSE	ebi-a-GCST005843	0.0164	440328	0.2175	6.46898e-09	0.585702	1331	Artery_age_gap	TRUE	0.0247219	3.4454e-06	TRUE	1.18754e-08
rs7897195	10	59283305	T	C	T	C	1.63901	0.0109	0.3418	0.3287	FALSE	FALSE	FALSE	ebi-a-GCST005843	0.0089	440328	0.2193	3.66268e-06	0.354023	1331	Artery_age_gap	TRUE	0.0158717	3.40641e-06	TRUE	5.58647e-06
rs79211442	6	22879454	C	T	C	T	-2.57794	0.0027	0.09767	0.1034	FALSE	FALSE	FALSE	ebi-a-GCST005843	0.0161	440328	0.8681	7.40596e-06	0.575217	1331	Artery_age_gap	TRUE	0.0148882	6.38707e-08	TRUE	8.47339e-06
rs7951354	11	23277759	A	G	A	G	-1.8425	0.0044	0.2122	0.2052	FALSE	FALSE	FALSE	ebi-a-GCST005843	0.0117	440328	0.7089	9.33458e-06	0.415724	1331	Artery_age_gap	TRUE	0.014565	3.21188e-07	TRUE	1.12179e-05
rs8059298	16	88332479	T	C	T	C	1.57292	0.0098	0.3749	0.353	FALSE	FALSE	FALSE	ebi-a-GCST005843	0.0093	440328	0.2916	9.02476e-06	0.354316	1331	Artery_age_gap	TRUE	0.0146121	2.5218e-06	TRUE	1.28701e-05
rs11635947	15	26656667	G	C	G	C	1.86479	0.0274	0.2757	0.2834	FALSE	TRUE	FALSE	ebi-a-GCST010681	0.0263	24840	0.2978	1.23784e-06	0.384533	1331	Artery_age_gap	TRUE	0.0173879	4.36972e-05	TRUE	7.65868e-06
rs13104420	4	37946063	G	A	G	A	-3.0543	0.0085	0.07551	0.0766	FALSE	FALSE	FALSE	ebi-a-GCST010681	0.0447	24840	0.8488	3.44959e-06	0.657962	1331	Artery_age_gap	TRUE	0.0159555	1.45581e-06	TRUE	7.96776e-06
rs1863622	3	186396616	C	T	C	T	1.89791	0.0481	0.2179	0.2249	FALSE	FALSE	FALSE	ebi-a-GCST010681	0.0285	24840	0.0913798	2.36286e-06	0.402132	1331	Artery_age_gap	TRUE	0.0164843	0.000114666	TRUE	2.62697e-05
rs2001560	9	132164971	G	C	G	C	-2.53736	-0.0586	0.2029	0.2322	FALSE	TRUE	FALSE	ebi-a-GCST010681	0.0388	24840	0.1312	2.51831e-06	0.539101	1331	Artery_age_gap	TRUE	0.0163952	9.1828e-05	TRUE	2.32618e-05
rs56106813	7	103451593	T	C	T	C	-3.34242	0.0016	0.06649	0.0624	FALSE	FALSE	FALSE	ebi-a-GCST010681	0.0483	24840	0.9736	2.77606e-06	0.713166	1331	Artery_age_gap	TRUE	0.0162591	4.41803e-08	TRUE	5.50446e-06
rs5758876	22	43099055	G	C	G	C	-1.68756	0.0116	0.417	0.4051	FALSE	TRUE	FALSE	ebi-a-GCST010681	0.0244	24840	0.6339	1.00886e-06	0.345111	1331	Artery_age_gap	TRUE	0.0176738	9.09946e-06	TRUE	3.46506e-06
rs73041834	6	169599703	T	A	T	A	-3.3995	-0.0367	0.09617	0.091	FALSE	TRUE	FALSE	ebi-a-GCST010681	0.0413	24840	0.3746	6.46898e-09	0.585702	1331	Artery_age_gap	TRUE	0.0247219	3.17908e-05	TRUE	5.6666e-08
rs7897195	10	59283305	T	C	T	C	1.63901	-0.0391	0.3418	0.3498	FALSE	FALSE	FALSE	ebi-a-GCST010681	0.0248	24840	0.1144	3.66268e-06	0.354023	1331	Artery_age_gap	TRUE	0.0158717	0.000100067	TRUE	3.44695e-05
rs79211442	6	22879454	C	T	C	T	-2.57794	-0.059	0.09767	0.094	FALSE	FALSE	FALSE	ebi-a-GCST010681	0.0421	24840	0.1607	7.40596e-06	0.575217	1331	Artery_age_gap	TRUE	0.0148882	7.90658e-05	TRUE	5.38669e-05
rs7951354	11	23277759	A	G	A	G	-1.8425	0.0016	0.2122	0.2112	FALSE	FALSE	FALSE	ebi-a-GCST010681	0.0289	24840	0.9565	9.33458e-06	0.415724	1331	Artery_age_gap	TRUE	0.014565	1.23404e-07	TRUE	1.75925e-05
rs8059298	16	88332479	T	C	T	C	1.57292	0.0532	0.3749	0.3664	FALSE	FALSE	FALSE	ebi-a-GCST010681	0.0243	24840	0.02844	9.02476e-06	0.354316	1331	Artery_age_gap	TRUE	0.0146121	0.000192935	TRUE	0.00013359
rs11635947	15	26656667	G	C	G	C	1.86479	-0.000104064	0.2757	0.287487	FALSE	TRUE	FALSE	ebi-a-GCST011364	0.0119319	17505	0.99	1.23784e-06	0.384533	1331	Artery_age_gap	TRUE	0.0173879	4.3458e-09	TRUE	3.19919e-06
rs13104420	4	37946063	G	A	G	A	-3.0543	0.00220658	0.07551	0.076134	FALSE	FALSE	FALSE	ebi-a-GCST011364	0.0203255	17505	0.91	3.44959e-06	0.657962	1331	Artery_age_gap	TRUE	0.0159555	6.73355e-07	TRUE	9.29934e-06
rs1863622	3	186396616	C	T	C	T	1.89791	0.000580966	0.2179	0.225056	FALSE	FALSE	FALSE	ebi-a-GCST011364	0.0128805	17505	0.96	2.36286e-06	0.402132	1331	Artery_age_gap	TRUE	0.0164843	1.16231e-07	TRUE	6.07252e-06
rs56106813	7	103451593	T	C	T	C	-3.34242	-0.0395835	0.06649	0.069281	FALSE	FALSE	FALSE	ebi-a-GCST011364	0.0212149	17505	0.0619998	2.77606e-06	0.713166	1331	Artery_age_gap	TRUE	0.0162591	0.00019886	TRUE	6.09981e-05
rs5758876	22	43099055	G	C	G	C	-1.68756	-0.0111593	0.417	0.405537	FALSE	TRUE	FALSE	ebi-a-GCST011364	0.0111175	17505	0.32	1.00886e-06	0.345111	1331	Artery_age_gap	TRUE	0.0176738	5.75602e-05	TRUE	9.33759e-06
rs73041834	6	169599703	T	A	T	A	-3.3995	-0.000890985	0.09617	0.08821	FALSE	TRUE	FALSE	ebi-a-GCST011364	0.018911	17505	0.96	6.46898e-09	0.585702	1331	Artery_age_gap	TRUE	0.0247219	1.26823e-07	TRUE	2.73255e-08
rs7897195	10	59283305	T	C	T	C	1.63901	-0.000138887	0.3418	0.34577	FALSE	FALSE	FALSE	ebi-a-GCST011364	0.0112752	17505	0.99	3.66268e-06	0.354023	1331	Artery_age_gap	TRUE	0.0158717	8.66886e-09	TRUE	8.72556e-06
rs79211442	6	22879454	C	T	C	T	-2.57794	0.00712652	0.09767	0.090431	FALSE	FALSE	FALSE	ebi-a-GCST011364	0.018611	17505	0.7	7.40596e-06	0.575217	1331	Artery_age_gap	TRUE	0.0148882	8.37721e-06	TRUE	2.59208e-05
rs7951354	11	23277759	A	G	A	G	-1.8425	0.00664328	0.2122	0.206615	FALSE	FALSE	FALSE	ebi-a-GCST011364	0.0133125	17505	0.62	9.33458e-06	0.415724	1331	Artery_age_gap	TRUE	0.014565	1.42275e-05	TRUE	3.65431e-05
rs8059298	16	88332479	T	C	T	C	1.57292	-0.0131783	0.3749	0.36335	FALSE	FALSE	FALSE	ebi-a-GCST011364	0.0111844	17505	0.24	9.02476e-06	0.354316	1331	Artery_age_gap	TRUE	0.0146121	7.93134e-05	TRUE	7.65687e-05
rs11635947	15	26656667	G	C	G	C	1.86479	0.00713168	0.2757		FALSE	TRUE	TRUE	ebi-a-GCST90013864	0.0100689	352063	0.478769	1.23784e-06	0.384533	1331	Artery_age_gap	FALSE	0.0173879	1.42495e-06	TRUE	1.74457e-06
rs13104420	4	37946063	G	A	G	A	-3.0543	-0.000108679	0.07551		FALSE	FALSE	FALSE	ebi-a-GCST90013864	0.0168179	352063	0.994844	3.44959e-06	0.657962	1331	Artery_age_gap	TRUE	0.0159555	1.18612e-10	TRUE	3.8604e-06
rs1863622	3	186396616	C	T	C	T	1.89791	0.0200759	0.2179		FALSE	FALSE	FALSE	ebi-a-GCST90013864	0.0109661	352063	0.0671413	2.36286e-06	0.402132	1331	Artery_age_gap	TRUE	0.0164843	9.51971e-06	TRUE	4.56845e-06
rs2001560	9	132164971	G	C	G	C	-2.53736	-0.00679196	0.2029		FALSE	TRUE	TRUE	ebi-a-GCST90013864	0.0133878	352063	0.611929	2.51831e-06	0.539101	1331	Artery_age_gap	FALSE	0.0163952	7.31061e-07	TRUE	3.28774e-06
rs56106813	7	103451593	T	C	T	C	-3.34242	-0.0263197	0.06649		FALSE	FALSE	FALSE	ebi-a-GCST90013864	0.0185851	352063	0.156725	2.77606e-06	0.713166	1331	Artery_age_gap	TRUE	0.0162591	5.69655e-06	TRUE	4.72697e-06
rs5758876	22	43099055	G	C	G	C	-1.68756	-0.00188445	0.417		FALSE	TRUE	TRUE	ebi-a-GCST90013864	0.0093443	352063	0.840176	1.00886e-06	0.345111	1331	Artery_age_gap	FALSE	0.0176738	1.1552e-07	TRUE	1.22227e-06
rs73041834	6	169599703	T	A	T	A	-3.3995	0.00266472	0.09617		FALSE	TRUE	TRUE	ebi-a-GCST90013864	0.0158668	352063	0.866628	6.46898e-09	0.585702	1331	Artery_age_gap	FALSE	0.0247219	8.01136e-08	TRUE	8.58367e-09
rs7897195	10	59283305	T	C	T	C	1.63901	-0.00356223	0.3418		FALSE	FALSE	FALSE	ebi-a-GCST90013864	0.00950196	352063	0.707739	3.66268e-06	0.354023	1331	Artery_age_gap	TRUE	0.0158717	3.99208e-07	TRUE	4.56373e-06
rs79211442	6	22879454	C	T	C	T	-2.57794	-0.00941735	0.09767		FALSE	FALSE	FALSE	ebi-a-GCST90013864	0.0154459	352063	0.542061	7.40596e-06	0.575217	1331	Artery_age_gap	TRUE	0.0148882	1.05588e-06	TRUE	9.73399e-06
rs7951354	11	23277759	A	G	A	G	-1.8425	0.0099539	0.2122		FALSE	FALSE	FALSE	ebi-a-GCST90013864	0.0111793	352063	0.373256	9.33458e-06	0.415724	1331	Artery_age_gap	TRUE	0.014565	2.25184e-06	TRUE	1.32077e-05
rs8059298	16	88332479	T	C	T	C	1.57292	-0.0136917	0.3749		FALSE	FALSE	FALSE	ebi-a-GCST90013864	0.0094379	352063	0.14686	9.02476e-06	0.354316	1331	Artery_age_gap	TRUE	0.0146121	5.97783e-06	TRUE	1.49456e-05
rs11635947	15	26656667	G	C	G	C	1.86479	0.00713168	0.2757		FALSE	TRUE	TRUE	ebi-a-GCST90013868	0.0100689	352063	0.478769	1.23784e-06	0.384533	1331	Artery_age_gap	FALSE	0.0173879	1.42495e-06	TRUE	1.74457e-06
rs13104420	4	37946063	G	A	G	A	-3.0543	-0.000108679	0.07551		FALSE	FALSE	FALSE	ebi-a-GCST90013868	0.0168179	352063	0.994844	3.44959e-06	0.657962	1331	Artery_age_gap	TRUE	0.0159555	1.18612e-10	TRUE	3.8604e-06
rs1863622	3	186396616	C	T	C	T	1.89791	0.0200759	0.2179		FALSE	FALSE	FALSE	ebi-a-GCST90013868	0.0109661	352063	0.0671413	2.36286e-06	0.402132	1331	Artery_age_gap	TRUE	0.0164843	9.51971e-06	TRUE	4.56845e-06
rs2001560	9	132164971	G	C	G	C	-2.53736	-0.00679196	0.2029		FALSE	TRUE	TRUE	ebi-a-GCST90013868	0.0133878	352063	0.611929	2.51831e-06	0.539101	1331	Artery_age_gap	FALSE	0.0163952	7.31061e-07	TRUE	3.28774e-06
rs56106813	7	103451593	T	C	T	C	-3.34242	-0.0263197	0.06649		FALSE	FALSE	FALSE	ebi-a-GCST90013868	0.0185851	352063	0.156725	2.77606e-06	0.713166	1331	Artery_age_gap	TRUE	0.0162591	5.69655e-06	TRUE	4.72697e-06
rs5758876	22	43099055	G	C	G	C	-1.68756	-0.00188445	0.417		FALSE	TRUE	TRUE	ebi-a-GCST90013868	0.0093443	352063	0.840176	1.00886e-06	0.345111	1331	Artery_age_gap	FALSE	0.0176738	1.1552e-07	TRUE	1.22227e-06
rs73041834	6	169599703	T	A	T	A	-3.3995	0.00266472	0.09617		FALSE	TRUE	TRUE	ebi-a-GCST90013868	0.0158668	352063	0.866628	6.46898e-09	0.585702	1331	Artery_age_gap	FALSE	0.0247219	8.01136e-08	TRUE	8.58367e-09
rs7897195	10	59283305	T	C	T	C	1.63901	-0.00356223	0.3418		FALSE	FALSE	FALSE	ebi-a-GCST90013868	0.00950196	352063	0.707739	3.66268e-06	0.354023	1331	Artery_age_gap	TRUE	0.0158717	3.99208e-07	TRUE	4.56373e-06
rs79211442	6	22879454	C	T	C	T	-2.57794	-0.00941735	0.09767		FALSE	FALSE	FALSE	ebi-a-GCST90013868	0.0154459	352063	0.542061	7.40596e-06	0.575217	1331	Artery_age_gap	TRUE	0.0148882	1.05588e-06	TRUE	9.73399e-06
rs7951354	11	23277759	A	G	A	G	-1.8425	0.0099539	0.2122		FALSE	FALSE	FALSE	ebi-a-GCST90013868	0.0111793	352063	0.373256	9.33458e-06	0.415724	1331	Artery_age_gap	TRUE	0.014565	2.25184e-06	TRUE	1.32077e-05
rs8059298	16	88332479	T	C	T	C	1.57292	-0.0136917	0.3749		FALSE	FALSE	FALSE	ebi-a-GCST90013868	0.0094379	352063	0.14686	9.02476e-06	0.354316	1331	Artery_age_gap	TRUE	0.0146121	5.97783e-06	TRUE	1.49456e-05
rs11635947	15	26656667	G	C	G	C	1.86479	-0.0276583	0.2757		FALSE	TRUE	TRUE	ebi-a-GCST90013891	0.079202	407746	0.726931	1.23784e-06	0.384533	1331	Artery_age_gap	FALSE	0.0173879	2.99082e-07	TRUE	1.54193e-06
rs13104420	4	37946063	G	A	G	A	-3.0543	-0.0191384	0.07551		FALSE	FALSE	FALSE	ebi-a-GCST90013891	0.132142	407746	0.884843	3.44959e-06	0.657962	1331	Artery_age_gap	TRUE	0.0159555	5.14448e-08	TRUE	3.98641e-06
rs1863622	3	186396616	C	T	C	T	1.89791	0.0884179	0.2179		FALSE	FALSE	FALSE	ebi-a-GCST90013891	0.0861965	407746	0.304999	2.36286e-06	0.402132	1331	Artery_age_gap	TRUE	0.0164843	2.58055e-06	TRUE	3.5065e-06
rs2001560	9	132164971	G	C	G	C	-2.53736	-0.0670516	0.2029		FALSE	TRUE	TRUE	ebi-a-GCST90013891	0.105567	407746	0.525325	2.51831e-06	0.539101	1331	Artery_age_gap	FALSE	0.0163952	9.89405e-07	TRUE	3.3503e-06
rs56106813	7	103451593	T	C	T	C	-3.34242	-0.105939	0.06649		FALSE	FALSE	FALSE	ebi-a-GCST90013891	0.146658	407746	0.470076	2.77606e-06	0.713166	1331	Artery_age_gap	TRUE	0.0162591	1.27971e-06	TRUE	3.77487e-06
rs5758876	22	43099055	G	C	G	C	-1.68756	-0.0154337	0.417		FALSE	TRUE	TRUE	ebi-a-GCST90013891	0.0735988	407746	0.833902	1.00886e-06	0.345111	1331	Artery_age_gap	FALSE	0.0176738	1.07848e-07	TRUE	1.21206e-06
rs73041834	6	169599703	T	A	T	A	-3.3995	0.022906	0.09617		FALSE	TRUE	TRUE	ebi-a-GCST90013891	0.124566	407746	0.854103	6.46898e-09	0.585702	1331	Artery_age_gap	FALSE	0.0247219	8.293e-08	TRUE	8.51793e-09
rs7897195	10	59283305	T	C	T	C	1.63901	0.00793663	0.3418		FALSE	FALSE	FALSE	ebi-a-GCST90013891	0.0747989	407746	0.915498	3.66268e-06	0.354023	1331	Artery_age_gap	TRUE	0.0158717	2.76118e-08	TRUE	4.18407e-06
rs79211442	6	22879454	C	T	C	T	-2.57794	-0.211867	0.09767		FALSE	FALSE	FALSE	ebi-a-GCST90013891	0.121639	407746	0.0815493	7.40596e-06	0.575217	1331	Artery_age_gap	TRUE	0.0148882	7.44029e-06	TRUE	1.28714e-05
rs7951354	11	23277759	A	G	A	G	-1.8425	-0.129011	0.2122		FALSE	FALSE	FALSE	ebi-a-GCST90013891	0.0879098	407746	0.142231	9.33458e-06	0.415724	1331	Artery_age_gap	TRUE	0.014565	5.28189e-06	TRUE	1.49968e-05
rs8059298	16	88332479	T	C	T	C	1.57292	0.0867312	0.3749		FALSE	FALSE	FALSE	ebi-a-GCST90013891	0.0744073	407746	0.243765	9.02476e-06	0.354316	1331	Artery_age_gap	TRUE	0.0146121	3.3322e-06	TRUE	1.34201e-05
rs11635947	15	26656667	G	C	G	C	1.86479	-0.00260458	0.2757		FALSE	TRUE	TRUE	ebi-a-GCST90013892	0.0118201	406831	0.825597	1.23784e-06	0.384533	1331	Artery_age_gap	FALSE	0.0173879	1.1935e-07	TRUE	1.48656e-06
rs13104420	4	37946063	G	A	G	A	-3.0543	-0.0353319	0.07551		FALSE	FALSE	FALSE	ebi-a-GCST90013892	0.0197058	406831	0.0729777	3.44959e-06	0.657962	1331	Artery_age_gap	TRUE	0.0159555	7.90188e-06	TRUE	6.24109e-06
rs1863622	3	186396616	C	T	C	T	1.89791	0.000103296	0.2179		FALSE	FALSE	FALSE	ebi-a-GCST90013892	0.0128663	406831	0.993594	2.36286e-06	0.402132	1331	Artery_age_gap	TRUE	0.0164843	1.58434e-10	TRUE	2.64469e-06
rs2001560	9	132164971	G	C	G	C	-2.53736	-0.0063308	0.2029		FALSE	TRUE	TRUE	ebi-a-GCST90013892	0.0157189	406831	0.68713	2.51831e-06	0.539101	1331	Artery_age_gap	FALSE	0.0163952	3.98713e-07	TRUE	3.14242e-06
rs56106813	7	103451593	T	C	T	C	-3.34242	-0.0141708	0.06649		FALSE	FALSE	FALSE	ebi-a-GCST90013892	0.0218109	406831	0.515878	2.77606e-06	0.713166	1331	Artery_age_gap	TRUE	0.0162591	1.0376e-06	TRUE	3.70128e-06
rs5758876	22	43099055	G	C	G	C	-1.68756	-0.0174816	0.417		FALSE	TRUE	TRUE	ebi-a-GCST90013892	0.0109705	406831	0.111047	1.00886e-06	0.345111	1331	Artery_age_gap	FALSE	0.0176738	6.24159e-06	TRUE	1.79983e-06
rs73041834	6	169599703	T	A	T	A	-3.3995	0.0135877	0.09617		FALSE	TRUE	TRUE	ebi-a-GCST90013892	0.0185485	406831	0.463836	6.46898e-09	0.585702	1331	Artery_age_gap	FALSE	0.0247219	1.31905e-06	TRUE	1.02496e-08
rs7897195	10	59283305	T	C	T	C	1.63901	-0.0049731	0.3418		FALSE	FALSE	FALSE	ebi-a-GCST90013892	0.0111517	406831	0.655632	3.66268e-06	0.354023	1331	Artery_age_gap	TRUE	0.0158717	4.88833e-07	TRUE	4.59198e-06
rs79211442	6	22879454	C	T	C	T	-2.57794	-0.0140053	0.09767		FALSE	FALSE	FALSE	ebi-a-GCST90013892	0.0181492	406831	0.440307	7.40596e-06	0.575217	1331	Artery_age_gap	TRUE	0.0148882	1.46372e-06	TRUE	9.98551e-06
rs7951354	11	23277759	A	G	A	G	-1.8425	-0.0154538	0.2122		FALSE	FALSE	FALSE	ebi-a-GCST90013892	0.0131029	406831	0.23823	9.33458e-06	0.415724	1331	Artery_age_gap	TRUE	0.014565	3.41918e-06	TRUE	1.39238e-05
rs8059298	16	88332479	T	C	T	C	1.57292	0.000569637	0.3749		FALSE	FALSE	FALSE	ebi-a-GCST90013892	0.0110774	406831	0.958988	9.02476e-06	0.354316	1331	Artery_age_gap	TRUE	0.0146121	6.49993e-09	TRUE	1.00264e-05
rs11635947	15	26656667	G	C	G	C	1.86479	-0.0276583	0.2757		FALSE	TRUE	TRUE	ebi-a-GCST90013941	0.079202	407746	0.726931	1.23784e-06	0.384533	1331	Artery_age_gap	FALSE	0.0173879	2.99082e-07	TRUE	1.54193e-06
rs13104420	4	37946063	G	A	G	A	-3.0543	-0.0191384	0.07551		FALSE	FALSE	FALSE	ebi-a-GCST90013941	0.132142	407746	0.884843	3.44959e-06	0.657962	1331	Artery_age_gap	TRUE	0.0159555	5.14448e-08	TRUE	3.98641e-06
rs1863622	3	186396616	C	T	C	T	1.89791	0.0884179	0.2179		FALSE	FALSE	FALSE	ebi-a-GCST90013941	0.0861965	407746	0.304999	2.36286e-06	0.402132	1331	Artery_age_gap	TRUE	0.0164843	2.58055e-06	TRUE	3.5065e-06
rs2001560	9	132164971	G	C	G	C	-2.53736	-0.0670516	0.2029		FALSE	TRUE	TRUE	ebi-a-GCST90013941	0.105567	407746	0.525325	2.51831e-06	0.539101	1331	Artery_age_gap	FALSE	0.0163952	9.89405e-07	TRUE	3.3503e-06
rs56106813	7	103451593	T	C	T	C	-3.34242	-0.105939	0.06649		FALSE	FALSE	FALSE	ebi-a-GCST90013941	0.146658	407746	0.470076	2.77606e-06	0.713166	1331	Artery_age_gap	TRUE	0.0162591	1.27971e-06	TRUE	3.77487e-06
rs5758876	22	43099055	G	C	G	C	-1.68756	-0.0154337	0.417		FALSE	TRUE	TRUE	ebi-a-GCST90013941	0.0735988	407746	0.833902	1.00886e-06	0.345111	1331	Artery_age_gap	FALSE	0.0176738	1.07848e-07	TRUE	1.21206e-06
rs73041834	6	169599703	T	A	T	A	-3.3995	0.022906	0.09617		FALSE	TRUE	TRUE	ebi-a-GCST90013941	0.124566	407746	0.854103	6.46898e-09	0.585702	1331	Artery_age_gap	FALSE	0.0247219	8.293e-08	TRUE	8.51793e-09
rs7897195	10	59283305	T	C	T	C	1.63901	0.00793663	0.3418		FALSE	FALSE	FALSE	ebi-a-GCST90013941	0.0747989	407746	0.915498	3.66268e-06	0.354023	1331	Artery_age_gap	TRUE	0.0158717	2.76118e-08	TRUE	4.18407e-06
rs79211442	6	22879454	C	T	C	T	-2.57794	-0.211867	0.09767		FALSE	FALSE	FALSE	ebi-a-GCST90013941	0.121639	407746	0.0815493	7.40596e-06	0.575217	1331	Artery_age_gap	TRUE	0.0148882	7.44029e-06	TRUE	1.28714e-05
rs7951354	11	23277759	A	G	A	G	-1.8425	-0.129011	0.2122		FALSE	FALSE	FALSE	ebi-a-GCST90013941	0.0879098	407746	0.142231	9.33458e-06	0.415724	1331	Artery_age_gap	TRUE	0.014565	5.28189e-06	TRUE	1.49968e-05
rs8059298	16	88332479	T	C	T	C	1.57292	0.0867312	0.3749		FALSE	FALSE	FALSE	ebi-a-GCST90013941	0.0744073	407746	0.243765	9.02476e-06	0.354316	1331	Artery_age_gap	TRUE	0.0146121	3.3322e-06	TRUE	1.34201e-05
rs11635947	15	26656667	G	C	G	C	1.86479	-0.00260458	0.2757		FALSE	TRUE	TRUE	ebi-a-GCST90013942	0.0118201	406831	0.825597	1.23784e-06	0.384533	1331	Artery_age_gap	FALSE	0.0173879	1.1935e-07	TRUE	1.48656e-06
rs13104420	4	37946063	G	A	G	A	-3.0543	-0.0353319	0.07551		FALSE	FALSE	FALSE	ebi-a-GCST90013942	0.0197058	406831	0.0729777	3.44959e-06	0.657962	1331	Artery_age_gap	TRUE	0.0159555	7.90188e-06	TRUE	6.24109e-06
rs1863622	3	186396616	C	T	C	T	1.89791	0.000103296	0.2179		FALSE	FALSE	FALSE	ebi-a-GCST90013942	0.0128663	406831	0.993594	2.36286e-06	0.402132	1331	Artery_age_gap	TRUE	0.0164843	1.58434e-10	TRUE	2.64469e-06
rs2001560	9	132164971	G	C	G	C	-2.53736	-0.0063308	0.2029		FALSE	TRUE	TRUE	ebi-a-GCST90013942	0.0157189	406831	0.68713	2.51831e-06	0.539101	1331	Artery_age_gap	FALSE	0.0163952	3.98713e-07	TRUE	3.14242e-06
rs56106813	7	103451593	T	C	T	C	-3.34242	-0.0141708	0.06649		FALSE	FALSE	FALSE	ebi-a-GCST90013942	0.0218109	406831	0.515878	2.77606e-06	0.713166	1331	Artery_age_gap	TRUE	0.0162591	1.0376e-06	TRUE	3.70128e-06
rs5758876	22	43099055	G	C	G	C	-1.68756	-0.0174816	0.417		FALSE	TRUE	TRUE	ebi-a-GCST90013942	0.0109705	406831	0.111047	1.00886e-06	0.345111	1331	Artery_age_gap	FALSE	0.0176738	6.24159e-06	TRUE	1.79983e-06
rs73041834	6	169599703	T	A	T	A	-3.3995	0.0135877	0.09617		FALSE	TRUE	TRUE	ebi-a-GCST90013942	0.0185485	406831	0.463836	6.46898e-09	0.585702	1331	Artery_age_gap	FALSE	0.0247219	1.31905e-06	TRUE	1.02496e-08
rs7897195	10	59283305	T	C	T	C	1.63901	-0.0049731	0.3418		FALSE	FALSE	FALSE	ebi-a-GCST90013942	0.0111517	406831	0.655632	3.66268e-06	0.354023	1331	Artery_age_gap	TRUE	0.0158717	4.88833e-07	TRUE	4.59198e-06
rs79211442	6	22879454	C	T	C	T	-2.57794	-0.0140053	0.09767		FALSE	FALSE	FALSE	ebi-a-GCST90013942	0.0181492	406831	0.440307	7.40596e-06	0.575217	1331	Artery_age_gap	TRUE	0.0148882	1.46372e-06	TRUE	9.98551e-06
rs7951354	11	23277759	A	G	A	G	-1.8425	-0.0154538	0.2122		FALSE	FALSE	FALSE	ebi-a-GCST90013942	0.0131029	406831	0.23823	9.33458e-06	0.415724	1331	Artery_age_gap	TRUE	0.014565	3.41918e-06	TRUE	1.39238e-05
rs8059298	16	88332479	T	C	T	C	1.57292	0.000569637	0.3749		FALSE	FALSE	FALSE	ebi-a-GCST90013942	0.0110774	406831	0.958988	9.02476e-06	0.354316	1331	Artery_age_gap	TRUE	0.0146121	6.49993e-09	TRUE	1.00264e-05
rs11635947	15	26656667	G	C	G	C	1.86479	0.0008	0.2757	0.359634	FALSE	TRUE	FALSE	ebi-a-GCST90018793	0.0083	470931	0.9224	1.23784e-06	0.384533	1331	Artery_age_gap	TRUE	0.0173879	1.97273e-08	TRUE	1.42439e-06
rs13104420	4	37946063	G	A	G	A	-3.0543	0.0037	0.07551	0.0758586	FALSE	FALSE	FALSE	ebi-a-GCST90018793	0.0183	470931	0.8388	3.44959e-06	0.657962	1331	Artery_age_gap	TRUE	0.0159555	8.68052e-08	TRUE	4.01456e-06
rs1863622	3	186396616	C	T	C	T	1.89791	0.0065	0.2179	0.265172	FALSE	FALSE	FALSE	ebi-a-GCST90018793	0.0088	470931	0.4598	2.36286e-06	0.402132	1331	Artery_age_gap	TRUE	0.0164843	1.15853e-06	TRUE	3.17788e-06
rs2001560	9	132164971	G	C	G	C	-2.53736	0.0083	0.2029	0.2764	FALSE	TRUE	FALSE	ebi-a-GCST90018793	0.0206	470931	0.687	2.51831e-06	0.539101	1331	Artery_age_gap	TRUE	0.0163952	3.4472e-07	TRUE	3.10228e-06
rs56106813	7	103451593	T	C	T	C	-3.34242	-0.0115	0.06649	0.122904	FALSE	FALSE	FALSE	ebi-a-GCST90018793	0.0117	470931	0.328	2.77606e-06	0.713166	1331	Artery_age_gap	TRUE	0.0162591	2.05148e-06	TRUE	3.96022e-06
rs5758876	22	43099055	G	C	G	C	-1.68756	-0.0069	0.417	0.420854	FALSE	TRUE	TRUE	ebi-a-GCST90018793	0.008	470931	0.3866	1.00886e-06	0.345111	1331	Artery_age_gap	FALSE	0.0176738	1.57965e-06	TRUE	1.42892e-06
rs7051365	X	9824847	T	C	T	C	-1.30059	-0.0034	0.2793	0.432935	FALSE	FALSE	FALSE	ebi-a-GCST90018793	0.0066	470931	0.604	6.85451e-06	0.289138	1331	Artery_age_gap	TRUE	0.0149962	5.63526e-07	TRUE	8.5271e-06
rs73041834	6	169599703	T	A	T	A	-3.3995	-0.0081	0.09617	0.076106	FALSE	TRUE	FALSE	ebi-a-GCST90018793	0.0158	470931	0.6069	6.46898e-09	0.585702	1331	Artery_age_gap	TRUE	0.0247219	5.58085e-07	TRUE	9.3331e-09
rs7897195	10	59283305	T	C	T	C	1.63901	-0.0046	0.3418	0.315213	FALSE	FALSE	FALSE	ebi-a-GCST90018793	0.0085	470931	0.5936	3.66268e-06	0.354023	1331	Artery_age_gap	TRUE	0.0158717	6.21902e-07	TRUE	4.64144e-06
rs79211442	6	22879454	C	T	C	T	-2.57794	-0.035	0.09767	0.103487	FALSE	FALSE	FALSE	ebi-a-GCST90018793	0.0158	470931	0.0264302	7.40596e-06	0.575217	1331	Artery_age_gap	TRUE	0.0148882	1.04199e-05	TRUE	1.3926e-05
rs7951354	11	23277759	A	G	A	G	-1.8425	-0.0041	0.2122	0.205685	FALSE	FALSE	FALSE	ebi-a-GCST90018793	0.0119	470931	0.7335	9.33458e-06	0.415724	1331	Artery_age_gap	TRUE	0.014565	2.52068e-07	TRUE	1.10751e-05
rs8059298	16	88332479	T	C	T	C	1.57292	-0.0113	0.3749	0.29428	FALSE	FALSE	FALSE	ebi-a-GCST90018793	0.0092	470931	0.2194	9.02476e-06	0.354316	1331	Artery_age_gap	TRUE	0.0146121	3.2035e-06	TRUE	1.32834e-05
rs11635947	15	26656667	G	C	G	C	1.86479	-0.0301	0.2757	0.363051	FALSE	TRUE	FALSE	ebi-a-GCST90018890	0.0147	483078	0.04018	1.23784e-06	0.384533	1331	Artery_age_gap	TRUE	0.0173879	8.67919e-06	TRUE	2.36273e-06
rs13104420	4	37946063	G	A	G	A	-3.0543	0.0179	0.07551	0.0758559	FALSE	FALSE	FALSE	ebi-a-GCST90018890	0.0345	483078	0.6042	3.44959e-06	0.657962	1331	Artery_age_gap	TRUE	0.0159555	5.57253e-07	TRUE	4.34109e-06
rs1863622	3	186396616	C	T	C	T	1.89791	0.0059	0.2179	0.267316	FALSE	FALSE	FALSE	ebi-a-GCST90018890	0.0156	483078	0.706	2.36286e-06	0.402132	1331	Artery_age_gap	TRUE	0.0164843	2.96101e-07	TRUE	2.88971e-06
rs2001560	9	132164971	G	C	G	C	-2.53736	0.0068	0.2029	0.2766	FALSE	TRUE	FALSE	ebi-a-GCST90018890	0.0279	483078	0.8074	2.51831e-06	0.539101	1331	Artery_age_gap	TRUE	0.0163952	1.22969e-07	TRUE	2.97266e-06
rs56106813	7	103451593	T	C	T	C	-3.34242	0.014	0.06649	0.126923	FALSE	FALSE	FALSE	ebi-a-GCST90018890	0.0209	483078	0.5028	2.77606e-06	0.713166	1331	Artery_age_gap	TRUE	0.0162591	9.28854e-07	TRUE	3.6448e-06
rs5758876	22	43099055	G	C	G	C	-1.68756	0.0271	0.417	0.42053	FALSE	TRUE	TRUE	ebi-a-GCST90018890	0.0144	483078	0.0589698	1.00886e-06	0.345111	1331	Artery_age_gap	FALSE	0.0176738	7.33154e-06	TRUE	1.85788e-06
rs7051365	X	9824847	T	C	T	C	-1.30059	0.0109	0.2793	0.438413	FALSE	FALSE	FALSE	ebi-a-GCST90018890	0.0116	483078	0.3507	6.85451e-06	0.289138	1331	Artery_age_gap	TRUE	0.0149962	1.82777e-06	TRUE	9.43292e-06
rs73041834	6	169599703	T	A	T	A	-3.3995	-0.0071	0.09617	0.0746412	FALSE	TRUE	FALSE	ebi-a-GCST90018890	0.0279	483078	0.798	6.46898e-09	0.585702	1331	Artery_age_gap	TRUE	0.0247219	1.34058e-07	TRUE	8.58815e-09
rs7897195	10	59283305	T	C	T	C	1.63901	-0.0188	0.3418	0.313107	FALSE	FALSE	FALSE	ebi-a-GCST90018890	0.0155	483078	0.2229	3.66268e-06	0.354023	1331	Artery_age_gap	TRUE	0.0158717	3.04534e-06	TRUE	5.47456e-06
rs79211442	6	22879454	C	T	C	T	-2.57794	-0.0117	0.09767	0.10354	FALSE	FALSE	FALSE	ebi-a-GCST90018890	0.0282	483078	0.676901	7.40596e-06	0.575217	1331	Artery_age_gap	TRUE	0.0148882	3.56335e-07	TRUE	8.95725e-06
rs7951354	11	23277759	A	G	A	G	-1.8425	-0.0184	0.2122	0.205547	FALSE	FALSE	FALSE	ebi-a-GCST90018890	0.0223	483078	0.4104	9.33458e-06	0.415724	1331	Artery_age_gap	TRUE	0.014565	1.40932e-06	TRUE	1.24095e-05
rs8059298	16	88332479	T	C	T	C	1.57292	0.0125	0.3749	0.289675	FALSE	FALSE	FALSE	ebi-a-GCST90018890	0.0169	483078	0.4599	9.02476e-06	0.354316	1331	Artery_age_gap	TRUE	0.0146121	1.13248e-06	TRUE	1.17624e-05
rs11635947	15	26656667	G	C	G	C	1.86479	-0.0338672	0.2757	0.3	FALSE	TRUE	FALSE	ebi-a-GCST90026412	0.0809342	3196	0.675622	1.23784e-06	0.384533	1331	Artery_age_gap	TRUE	0.0173879	5.48196e-05	TRUE	0.000125432
rs13104420	4	37946063	G	A	G	A	-3.0543	0.0907738	0.07551	0.066	FALSE	FALSE	FALSE	ebi-a-GCST90026412	0.150093	3196	0.545324	3.44959e-06	0.657962	1331	Artery_age_gap	TRUE	0.0159555	0.000114503	TRUE	0.000368746
rs1863622	3	186396616	C	T	C	T	1.89791	0.057417	0.2179	0.231	FALSE	FALSE	FALSE	ebi-a-GCST90026412	0.0864996	3196	0.506827	2.36286e-06	0.402132	1331	Artery_age_gap	TRUE	0.0164843	0.00013793	TRUE	0.000325444
rs2001560	9	132164971	G	C	G	C	-2.53736	0.0107582	0.2029	0.202	FALSE	TRUE	FALSE	ebi-a-GCST90026412	0.134112	3196	0.936051	2.51831e-06	0.539101	1331	Artery_age_gap	TRUE	0.0163952	2.01469e-06	TRUE	9.63653e-05
rs56106813	7	103451593	T	C	T	C	-3.34242	-0.108796	0.06649	0.061	FALSE	FALSE	FALSE	ebi-a-GCST90026412	0.158624	3196	0.492794	2.77606e-06	0.713166	1331	Artery_age_gap	TRUE	0.0162591	0.000147261	TRUE	0.000378291
rs5758876	22	43099055	G	C	G	C	-1.68756	-0.192423	0.417	0.437	FALSE	TRUE	TRUE	ebi-a-GCST90026412	0.0737158	3196	0.00904545	1.00886e-06	0.345111	1331	Artery_age_gap	FALSE	0.0176738	0.00212879	TRUE	0.007326
rs73041834	6	169599703	T	A	T	A	-3.3995	0.220978	0.09617	0.103	FALSE	TRUE	FALSE	ebi-a-GCST90026412	0.120894	3196	0.0675678	6.46898e-09	0.585702	1331	Artery_age_gap	TRUE	0.0247219	0.00104496	TRUE	0.000110983
rs7897195	10	59283305	T	C	T	C	1.63901	0.0611316	0.3418	0.338	FALSE	FALSE	FALSE	ebi-a-GCST90026412	0.0761609	3196	0.422172	3.66268e-06	0.354023	1331	Artery_age_gap	TRUE	0.0158717	0.000201672	TRUE	0.000573294
rs79211442	6	22879454	C	T	C	T	-2.57794	-0.00415327	0.09767	0.125	FALSE	FALSE	FALSE	ebi-a-GCST90026412	0.111002	3196	0.970131	7.40596e-06	0.575217	1331	Artery_age_gap	TRUE	0.0148882	4.38312e-07	TRUE	0.000187526
rs7951354	11	23277759	A	G	A	G	-1.8425	0.00316483	0.2122	0.22	FALSE	FALSE	FALSE	ebi-a-GCST90026412	0.0893731	3196	0.971753	9.33458e-06	0.415724	1331	Artery_age_gap	TRUE	0.014565	3.92602e-07	TRUE	0.000219929
rs8059298	16	88332479	T	C	T	C	1.57292	-0.0397379	0.3749	0.352	FALSE	FALSE	FALSE	ebi-a-GCST90026412	0.0762461	3196	0.602243	9.02476e-06	0.354316	1331	Artery_age_gap	TRUE	0.0146121	8.5036e-05	TRUE	0.000586495
rs11635947	15	26656667	G	C	G	C	1.86479	-0.0976042	0.2757	0.294	FALSE	TRUE	FALSE	ebi-a-GCST90026413	0.0573556	3937	0.0888055	1.23784e-06	0.384533	1331	Artery_age_gap	TRUE	0.0173879	0.000735396	TRUE	0.000885495
rs13104420	4	37946063	G	A	G	A	-3.0543	-0.0369789	0.07551	0.066	FALSE	FALSE	FALSE	ebi-a-GCST90026413	0.106773	3937	0.729093	3.44959e-06	0.657962	1331	Artery_age_gap	TRUE	0.0159555	3.04809e-05	TRUE	0.000129436
rs1863622	3	186396616	C	T	C	T	1.89791	-0.0184405	0.2179	0.228	FALSE	FALSE	FALSE	ebi-a-GCST90026413	0.0616527	3937	0.764862	2.36286e-06	0.402132	1331	Artery_age_gap	TRUE	0.0164843	2.27346e-05	TRUE	8.93808e-05
rs2001560	9	132164971	G	C	G	C	-2.53736	0.194138	0.2029	0.205	FALSE	TRUE	FALSE	ebi-a-GCST90026413	0.092884	3937	0.036605	2.51831e-06	0.539101	1331	Artery_age_gap	TRUE	0.0163952	0.00110895	TRUE	0.00263684
rs56106813	7	103451593	T	C	T	C	-3.34242	0.184775	0.06649	0.065	FALSE	FALSE	FALSE	ebi-a-GCST90026413	0.109716	3937	0.0921574	2.77606e-06	0.713166	1331	Artery_age_gap	TRUE	0.0162591	0.000720259	TRUE	0.00140341
rs5758876	22	43099055	G	C	G	C	-1.68756	-0.0365594	0.417	0.442	FALSE	TRUE	TRUE	ebi-a-GCST90026413	0.0524913	3937	0.486127	1.00886e-06	0.345111	1331	Artery_age_gap	FALSE	0.0176738	0.000123261	TRUE	0.000111517
rs73041834	6	169599703	T	A	T	A	-3.3995	0.0617095	0.09617	0.101	FALSE	TRUE	FALSE	ebi-a-GCST90026413	0.0852184	3937	0.468982	6.46898e-09	0.585702	1331	Artery_age_gap	TRUE	0.0247219	0.00013324	TRUE	3.62134e-06
rs7897195	10	59283305	T	C	T	C	1.63901	0.087106	0.3418	0.342	FALSE	FALSE	FALSE	ebi-a-GCST90026413	0.0540484	3937	0.107042	3.66268e-06	0.354023	1331	Artery_age_gap	TRUE	0.0158717	0.000659628	TRUE	0.00146555
rs79211442	6	22879454	C	T	C	T	-2.57794	0.0562718	0.09767	0.126	FALSE	FALSE	FALSE	ebi-a-GCST90026413	0.0786982	3937	0.474596	7.40596e-06	0.575217	1331	Artery_age_gap	TRUE	0.0148882	0.000129912	TRUE	0.000456976
rs7951354	11	23277759	A	G	A	G	-1.8425	0.0285655	0.2122	0.222	FALSE	FALSE	FALSE	ebi-a-GCST90026413	0.0628	3937	0.64921	9.33458e-06	0.415724	1331	Artery_age_gap	TRUE	0.014565	5.25771e-05	TRUE	0.000327043
rs8059298	16	88332479	T	C	T	C	1.57292	0.108292	0.3749	0.361	FALSE	FALSE	FALSE	ebi-a-GCST90026413	0.054424	3937	0.0466165	9.02476e-06	0.354316	1331	Artery_age_gap	TRUE	0.0146121	0.00100515	TRUE	0.00467982
rs11635947	15	26656667	G	C	G	C	1.86479	-0.0404209	0.2757	0.299	FALSE	TRUE	FALSE	ebi-a-GCST90026414	0.0575993	3874	0.482828	1.23784e-06	0.384533	1331	Artery_age_gap	TRUE	0.0173879	0.000127171	TRUE	0.000135578
rs13104420	4	37946063	G	A	G	A	-3.0543	0.0559679	0.07551	0.066	FALSE	FALSE	FALSE	ebi-a-GCST90026414	0.105464	3874	0.59564	3.44959e-06	0.657962	1331	Artery_age_gap	TRUE	0.0159555	7.27282e-05	TRUE	0.000195216
rs1863622	3	186396616	C	T	C	T	1.89791	0.0256116	0.2179	0.23	FALSE	FALSE	FALSE	ebi-a-GCST90026414	0.0612742	3874	0.675957	2.36286e-06	0.402132	1331	Artery_age_gap	TRUE	0.0164843	4.51194e-05	TRUE	0.000118874
rs2001560	9	132164971	G	C	G	C	-2.53736	0.0486729	0.2029	0.202	FALSE	TRUE	FALSE	ebi-a-GCST90026414	0.0936042	3874	0.603062	2.51831e-06	0.539101	1331	Artery_age_gap	TRUE	0.0163952	6.98262e-05	TRUE	0.000153221
rs56106813	7	103451593	T	C	T	C	-3.34242	0.147336	0.06649	0.064	FALSE	FALSE	FALSE	ebi-a-GCST90026414	0.111549	3874	0.186562	2.77606e-06	0.713166	1331	Artery_age_gap	TRUE	0.0162591	0.000450355	TRUE	0.000767911
rs5758876	22	43099055	G	C	G	C	-1.68756	-0.0418256	0.417	0.441	FALSE	TRUE	TRUE	ebi-a-GCST90026414	0.0527502	3874	0.427837	1.00886e-06	0.345111	1331	Artery_age_gap	FALSE	0.0176738	0.000162342	TRUE	0.000142031
rs73041834	6	169599703	T	A	T	A	-3.3995	0.0334221	0.09617	0.101	FALSE	TRUE	FALSE	ebi-a-GCST90026414	0.0860357	3874	0.69767	6.46898e-09	0.585702	1331	Artery_age_gap	TRUE	0.0247219	3.89725e-05	TRUE	1.67445e-06
rs7897195	10	59283305	T	C	T	C	1.63901	0.0917854	0.3418	0.342	FALSE	FALSE	FALSE	ebi-a-GCST90026414	0.0538433	3874	0.0882551	3.66268e-06	0.354023	1331	Artery_age_gap	TRUE	0.0158717	0.000749933	TRUE	0.00180018
rs79211442	6	22879454	C	T	C	T	-2.57794	-0.00918538	0.09767	0.125	FALSE	FALSE	FALSE	ebi-a-GCST90026414	0.0776629	3874	0.90585	7.40596e-06	0.575217	1331	Artery_age_gap	TRUE	0.0148882	3.61269e-06	TRUE	0.000146893
rs7951354	11	23277759	A	G	A	G	-1.8425	0.0238167	0.2122	0.222	FALSE	FALSE	FALSE	ebi-a-GCST90026414	0.0625534	3874	0.703393	9.33458e-06	0.415724	1331	Artery_age_gap	TRUE	0.014565	3.74377e-05	TRUE	0.000293316
rs8059298	16	88332479	T	C	T	C	1.57292	-0.0707536	0.3749	0.351	FALSE	FALSE	FALSE	ebi-a-GCST90026414	0.0547665	3874	0.196389	9.02476e-06	0.354316	1331	Artery_age_gap	TRUE	0.0146121	0.000430868	TRUE	0.00154045
rs11635947	15	26656667	G	C	G	C	1.86479	0.0640425	0.2757	0.304	FALSE	TRUE	FALSE	ebi-a-GCST90026415	0.053509	4118	0.231359	1.23784e-06	0.384533	1331	Artery_age_gap	TRUE	0.0173879	0.000347902	TRUE	0.000304324
rs13104420	4	37946063	G	A	G	A	-3.0543	0.194449	0.07551	0.069	FALSE	FALSE	FALSE	ebi-a-GCST90026415	0.0982216	4118	0.0477386	3.44959e-06	0.657962	1331	Artery_age_gap	TRUE	0.0159555	0.000951281	TRUE	0.00231678
rs1863622	3	186396616	C	T	C	T	1.89791	0.0220815	0.2179	0.231	FALSE	FALSE	FALSE	ebi-a-GCST90026415	0.0572259	4118	0.699592	2.36286e-06	0.402132	1331	Artery_age_gap	TRUE	0.0164843	3.61727e-05	TRUE	9.61201e-05
rs2001560	9	132164971	G	C	G	C	-2.53736	-0.00188419	0.2029	0.201	FALSE	TRUE	FALSE	ebi-a-GCST90026415	0.0871629	4118	0.982771	2.51831e-06	0.539101	1331	Artery_age_gap	TRUE	0.0163952	1.1353e-07	TRUE	4.72372e-05
rs56106813	7	103451593	T	C	T	C	-3.34242	-0.14334	0.06649	0.06	FALSE	FALSE	FALSE	ebi-a-GCST90026415	0.107523	4118	0.182494	2.77606e-06	0.713166	1331	Artery_age_gap	TRUE	0.0162591	0.000431588	TRUE	0.000663958
rs5758876	22	43099055	G	C	G	C	-1.68756	-0.0735876	0.417	0.437	FALSE	TRUE	TRUE	ebi-a-GCST90026415	0.0497982	4118	0.139486	1.00886e-06	0.345111	1331	Artery_age_gap	FALSE	0.0176738	0.000530245	TRUE	0.000451947
rs73041834	6	169599703	T	A	T	A	-3.3995	0.0248987	0.09617	0.1	FALSE	TRUE	FALSE	ebi-a-GCST90026415	0.0812135	4118	0.759159	6.46898e-09	0.585702	1331	Artery_age_gap	TRUE	0.0247219	2.28356e-05	TRUE	1.10316e-06
rs7897195	10	59283305	T	C	T	C	1.63901	0.0485427	0.3418	0.339	FALSE	FALSE	FALSE	ebi-a-GCST90026415	0.0514861	4118	0.345766	3.66268e-06	0.354023	1331	Artery_age_gap	TRUE	0.0158717	0.000215923	TRUE	0.00038881
rs79211442	6	22879454	C	T	C	T	-2.57794	0.0179833	0.09767	0.123	FALSE	FALSE	FALSE	ebi-a-GCST90026415	0.0751371	4118	0.810842	7.40596e-06	0.575217	1331	Artery_age_gap	TRUE	0.0148882	1.39171e-05	TRUE	0.000164981
rs7951354	11	23277759	A	G	A	G	-1.8425	-0.0799543	0.2122	0.216	FALSE	FALSE	FALSE	ebi-a-GCST90026415	0.0596018	4118	0.179767	9.33458e-06	0.415724	1331	Artery_age_gap	TRUE	0.014565	0.000437018	TRUE	0.00147143
rs8059298	16	88332479	T	C	T	C	1.57292	0.0328333	0.3749	0.357	FALSE	FALSE	FALSE	ebi-a-GCST90026415	0.0513997	4118	0.522964	9.02476e-06	0.354316	1331	Artery_age_gap	TRUE	0.0146121	9.91264e-05	TRUE	0.000410035
rs11635947	15	26656667	G	C	G	C	1.86479	-0.0282099	0.2757	0.298	FALSE	TRUE	FALSE	ebi-a-GCST90026416	0.0436969	5605	0.51856	1.23784e-06	0.384533	1331	Artery_age_gap	TRUE	0.0173879	7.43788e-05	TRUE	4.84115e-05
rs13104420	4	37946063	G	A	G	A	-3.0543	-0.0210717	0.07551	0.066	FALSE	FALSE	FALSE	ebi-a-GCST90026416	0.0814322	5605	0.795816	3.44959e-06	0.657962	1331	Artery_age_gap	TRUE	0.0159555	1.19504e-05	TRUE	5.17423e-05
rs1863622	3	186396616	C	T	C	T	1.89791	-0.055702	0.2179	0.224	FALSE	FALSE	FALSE	ebi-a-GCST90026416	0.0472583	5605	0.238531	2.36286e-06	0.402132	1331	Artery_age_gap	TRUE	0.0164843	0.000247889	TRUE	0.000203913
rs2001560	9	132164971	G	C	G	C	-2.53736	0.0451424	0.2029	0.203	FALSE	TRUE	FALSE	ebi-a-GCST90026416	0.0701879	5605	0.520103	2.51831e-06	0.539101	1331	Artery_age_gap	TRUE	0.0163952	7.38231e-05	TRUE	8.25293e-05
rs56106813	7	103451593	T	C	T	C	-3.34242	0.00715604	0.06649	0.062	FALSE	FALSE	FALSE	ebi-a-GCST90026416	0.0850765	5605	0.932967	2.77606e-06	0.713166	1331	Artery_age_gap	TRUE	0.0162591	1.26271e-06	TRUE	3.12875e-05
rs5758876	22	43099055	G	C	G	C	-1.68756	-0.0633667	0.417	0.436	FALSE	TRUE	TRUE	ebi-a-GCST90026416	0.0401944	5605	0.114911	1.00886e-06	0.345111	1331	Artery_age_gap	FALSE	0.0176738	0.000443382	TRUE	0.000222725
rs73041834	6	169599703	T	A	T	A	-3.3995	0.0300355	0.09617	0.102	FALSE	TRUE	FALSE	ebi-a-GCST90026416	0.0656518	5605	0.647313	6.46898e-09	0.585702	1331	Artery_age_gap	TRUE	0.0247219	3.73542e-05	TRUE	5.8996e-07
rs7897195	10	59283305	T	C	T	C	1.63901	0.043966	0.3418	0.341	FALSE	FALSE	FALSE	ebi-a-GCST90026416	0.041403	5605	0.288276	3.66268e-06	0.354023	1331	Artery_age_gap	TRUE	0.0158717	0.000201216	TRUE	0.000228677
rs79211442	6	22879454	C	T	C	T	-2.57794	0.00887191	0.09767	0.125	FALSE	FALSE	FALSE	ebi-a-GCST90026416	0.0596797	5605	0.881827	7.40596e-06	0.575217	1331	Artery_age_gap	TRUE	0.0148882	3.9442e-06	TRUE	7.72481e-05
rs7951354	11	23277759	A	G	A	G	-1.8425	0.019112	0.2122	0.222	FALSE	FALSE	FALSE	ebi-a-GCST90026416	0.047546	5605	0.687705	9.33458e-06	0.415724	1331	Artery_age_gap	TRUE	0.014565	2.88371e-05	TRUE	0.00014609
rs8059298	16	88332479	T	C	T	C	1.57292	0.0145025	0.3749	0.357	FALSE	FALSE	FALSE	ebi-a-GCST90026416	0.0414816	5605	0.726634	9.02476e-06	0.354316	1331	Artery_age_gap	TRUE	0.0146121	2.18145e-05	TRUE	0.0001297
rs11635947	15	26656667	G	C	G	C	1.86479	0.00166139	0.2757	0.28435	FALSE	TRUE	FALSE	ebi-a-GCST90029019	0.00101663	477807	0.13	1.23784e-06	0.384533	1331	Artery_age_gap	TRUE	0.0173879	5.58939e-06	TRUE	2.12945e-06
rs13104420	4	37946063	G	A	G	A	-3.0543	-8.73582e-05	0.07551	0.07875	FALSE	FALSE	FALSE	ebi-a-GCST90029019	0.00169871	477807	0.84	3.44959e-06	0.657962	1331	Artery_age_gap	TRUE	0.0159555	5.53501e-09	TRUE	3.86087e-06
rs1863622	3	186396616	C	T	C	T	1.89791	-0.000834931	0.2179	0.22133	FALSE	FALSE	FALSE	ebi-a-GCST90029019	0.00110024	477807	0.4	2.36286e-06	0.402132	1331	Artery_age_gap	TRUE	0.0164843	1.20524e-06	TRUE	3.18852e-06
rs2001560	9	132164971	G	C	G	C	-2.53736	0.000621399	0.2029	0.214694	FALSE	TRUE	FALSE	ebi-a-GCST90029019	0.00135486	477807	0.69	2.51831e-06	0.539101	1331	Artery_age_gap	TRUE	0.0163952	4.40252e-07	TRUE	3.14304e-06
rs56106813	7	103451593	T	C	T	C	-3.34242	0.00174199	0.06649	0.064149	FALSE	FALSE	FALSE	ebi-a-GCST90029019	0.00186061	477807	0.39	2.77606e-06	0.713166	1331	Artery_age_gap	TRUE	0.0162591	1.83455e-06	TRUE	3.90482e-06
[truncated: 4,790 more rows]

## Sheet: ST5
Name	Description	organ_specific_2times	Adipose	Adrenal	Artery	Bladder	Brain	Esophagus	Female	Heart	Immune	Intestine	Kidney	Liver	Lung	Male	Muscle_Skeletal	Pancreas	Pituitary	Salivary	Skin	Stomach	Thyroid
[truncated: 513 more rows]

[truncated: 6 more sheets: ST6, ST7, ST8, ST9, ST10, ST11]
