# Supplementary material for: Opposite effects of chronic HIV infection and antiretroviral medication on organismal and organ-specific biological aging
Source: Research Square preprint supplement (doi:10.21203/rs.3.rs-7234421/v1), 2025-08-29
Supplement: Supplementary file 2 [file 536c75d8ee31c77638fb456a.xlsx]

## Sheet: Sheet1
		Description	2000HIV	200HIV	200FG
basic	N		1850	205	98
	Age mean (+/- sd)	Mean age at the time of baseline visit	50.7 ± 17.2	77.7 ± 8.9	73.2 ± 10.8
	Age range	Range of age at the time of baseline visit	19 - 89	36 - 104	27 - 101
	Female %	Percent of female	0.15	0.078	0.245
	BMI(kg/m2) (+-sd)	Body mass index	25.53216±4.253038	24.1±3.530286	-
	ethnicity	Ethnical background
	Asian		84(4.54%)	-	-
	Black		187(10.10%)	-	-
	Hispanic		49(2.65%)	-	-
	Mixed	Two grandparents of at least two different ethnical ancestries	130(7.03%)	-	-
	Native American		3(0.16%)	-	-
	White		1395(75.41%)	-	-
	Unknown		2(0.11%)	-	-
Clinical features	IMT(mm) (+-sd)	What is the Intima media thickness?	0.6746048±0.1408462	-	-
	Liver stiffness measurement(kPa) (+-sd)	Liver stiffness measurement	4.82263±2.074682	-	-
	RRSYST1(mmHg) (+-sd)	First blood pressure (systolic)	131.4512±16.07886	-	-
	Diastolic blood pressure (first)(mmHg) (+-sd)	First blood pressure (diastolic)	80.61456±9.751658	-	-
	Creatinine(μmol/L)(+-sd)	What was the most recent value of Creatinin?	91.06284±28.91067	-	-
	CAP liver score(dB/m)(+-sd)	Controlled attenuation parameter	250.5757±53.37944	-	-
	eGFR (ml/min/1,73 m2)(+-sd)	What was the most recent eGFR?	67.06714±22.8976	-	-
	Recent eGFR smaller than 90 (ml/min/1,73 m2)	Specify the most recent eGFR if EGFR was 90 or <90
	≤90		1181(63.84%)	-	-
	>90		665(35.95%)	-	-
	Unknown		4(0.22%)	-	-
	Height(cm) (+-sd)	Body height	177.7562±8.888835	-	-
HIV related	HIV duration (years)		13.70517±8.198396	8.47±6.611545	-
	VL_LATEST(copies/ml)	What was the most recent viral load?
	>40		60(3.24%)	-	-
	Undetectable		1790(96.76%)	-	-
	AIDs malignancy ever	Did patient ever have an AIDS-defining malignancy?
	Yes		113(6.11%)	-	-
	No		1730(93.51%)	-	-
	Unknown		7(0.38%)	-	-
	CD4_LATEST(10^9 cells/L)(+-sd)	What is the most recent CD4 T cell count at baseline?	0.740951±0.302558	-	-
	CD4_NADIR(10^9 cells/L)(+-sd)	What was the lowest CD4 T cell count ever?	0.290259±0.2170506	-	-
	CD8_LATEST(10^9 cells/L)(+-sd)	What is the most recent CD8 T cell count at baseline?	0.9340733±0.4613754	-	-
	CD4CD8_LATEST(+-sd)	What is the most recent CD4/CD8 ratio	0.9497539±0.49561	-	-
	CD4CD8_PRECART(+-sd)	What was the most recent CD4/CD8 ratio before start ART?	0.3473684±0.2699624	-	-
	Mutation before ART	Were there HIV mutations conferring ART-resistance before start ART?
	Yes		161(8.70%)	-	-
	No		567(30.65%)	-	-
	Unknown		1122(60.65%)	-	-
	HIV_STAGE	CDC stage at the time of start ART
	Stage 1	≥500 CD4+ T cellen/µL	241(13.03%)	-	-
	Stage 2	200–499 CD4+ T cellen/µL	846(45.73%)	-	-
	Stage 3	<200 CD4+ T cellen/µL or AIDS defining diagnosis	710(38.38%)	-	-
	Unknown		33(1.78%)	-	-
	RESIDUAL_VIR	During the 3 years prior to baseline, was the viral load always unquantifiable? Quantifiable viral load is VL > 40 copies/ml
	Yes		1488(80.43%)	-	-
	No		350(18.92%)	-	-
	Unknown		12(0.65%)	-	-
	Elite controller	Primary comparison between elite controllers (EC) and non-controlling PLHIV on ART (Non-EC)
	EC_persistent		60(3.24%)	-	-
	EC_transient		54(2.92%)	-	-
	Non-EC		1697(91.73%)	-	-
	Unknown		39(2.11%)	-	-
cART	CART.NRTIs	Participant uses a NRTI (such as abacavir, lamivudine, emtricitabine, but NOT tenofovir) as antiretroviral therapy?
	Yes		1758(95.03%)	-	-
	No		92(4.97%)	-	-
	CART.NtRTIs	Participant uses a NtRTI (such as tenofovir alafenamide or tenofovir disproxil) as antiretroviral therapy?
	Yes		1286(69.51%)	-	-
	No		564(30.49%)	-	-
	CART.NNRTIs	Participant uses NNRTI (non-nucleoside reverse transcriptase inhibitor) as antiretroviral therapy?
	Yes		727(39.30%)	-	-
	No		1123(60.70%)	-	-
	CART.Integrase_inhibitors	Participant uses an integrase inhibitor as antiretroviral therapy?
	Yes		1013(54.76%)	-	-
	No		837(45.24%)	-	-
	CART.Protease_inhibitors	Participant uses a protease inhibitor as antiretroviral therapy?
	Yes		176(9.51%)	-	-
	No		1674(90.49%)	-	-
	CART.Other	Use of booster regimes (cobicistat or ritonavir)
	Yes		368(19.89%)	-	-
	No		1482(80.11%)	-	-
co-Comorbidity	Parkinsons disease	Was participant ever diagnosed with Parkinsons
	Yes		4(0.22%)	-	-
	No		1846(99.78%)	-	-
	DM2	Was participant ever diagnosed with diabetes mellitus type 2
	Yes		88(4.76%)	-	-
	No		1762(95.24%)	-	-
	COPD	Was participant ever diagnosed with COPD
	Yes		58(3.14%)	-	-
	No		1792(96.86%)	-	-
	Inflammatory arthritis	Was participant ever diagnosed with inflammatory arthritis
	Yes		24(1.30%)	-	-
	No		1826(98.70%)	-	-
	CVD.Other	Was participant ever diagnosed with any other cardiovascular disease (Other than hypertension, myocardial infarction, stroke, cardial arrhythmia, peripheral arterial vascular disease, thromboembolism, pulmonary embolism, or angina pectoris)
	Yes		80(4.32%)	-	-
	No		1770(95.68%)	-	-
	Hypertension	Was participant ever diagnosed with hypertension
	Yes		459(24.81%)	-	-
	No		1391(75.19%)	-	-
	Angina pectoris	Was participant ever diagnosed with angina pectoris
	Yes		57(3.08%)	-	-
	No		1793(96.92%)	-	-
	Asthma	Was participant ever diagnosed with asthma
	Yes		98(5.30%)	-	-
	No		1752(94.70%)	-	-
	Liversteatosis	Was participant ever diagnosed with Liversteatosis
	Yes		198(10.70%)	-	-
	No		1652(89.30%)	-	-
	Deep venous thromboembolism	Was participant ever diagnosed with deep venous thromboembolism
	Yes		65(3.51%)	-	-
	No		1785(96.49%)	-	-
	CNS disease	Was participant ever diagnosed with a central nervous system disease/disorder
	Yes		155(8.38%)	-	-
	No		1695(91.62%)	-	-
	Endocrine metabolic disorders	Endocrine (hormonal) or metabolic disorders diagnosed
	Yes		563(30.43%)	-	-
	No		1287(69.57%)	-	-
	RESP	Was participant ever diagnosed with a pulmonary disease
	Yes		222(12%)	-	-
	No		1628(88%)	-	-
	CVD	Cardiovascular disorder diagnosed
	Yes		595(32.16%)	-	-
	No		1255(67.84%)	-	-
	Metabole syndrome	Does subject meet criteria of metabole syndrome
	Yes		502(27.14%)	-	-
	No		1348(72.86%)	-	-
	MH_TR_GE	Was participant ever diagnosed with a gastroenterology disease
	Yes		439(23.73%)	-	-
	No		1411(76.27%)	-	-
Medication use	MED_STAT.Evolocumab	Did participant use Evolocumab in the last two weeks
	Yes		3	-	-
	No		1847	-	-
	MED_ANTIINFLAM.Other	Did participant use other anti-inflammatory medication in the last two weeks (Other than NSAID or corticosteroids)
	Yes		8	-	-
	No		1842	-	-
	MED_ANTIDIAB.Insulin	Did participant use insulin in the last two weeks (Both rapid and long acting)
	Yes		25	-	-
	No		1825	-	-
	MED_ANTIDIAB.Suderivate	Did participant use sulfonylureum derivative medication in the last two weeks
	Yes		21	-	-
	No		1829	-	-
	MED_ANTIDIAB.Other	Did participant use other antidiabetic medication in the last two weeks (Other than insulin, metformin or SU derivatives )
	Yes		6	-	-
	No		1844	-	-
	MED.Antidiabetics	Did participant use antidiabetic medication in the last two weeks
	Yes		79	-	-
	No		1771	-	-
	MED_PSY.Other	Did participant use other psychotropic medication in the last two weeks (Other than benzodiazepines, antipsychotics, lithium, TCA, SSRI or stimulants)
	Yes		31	-	-
	No		1819	-	-
	MED_ANTIDIAB.Metformin	Did participant use metformin in the last two weeks
	Yes		64	-	-
	No		1786	-	-
	MED_AC.VKA	Did participant use vitamin K antagonist medication in the last two weeks
	Yes		25	-	-
	No		1825	-	-
	MED_PLATINH.Clopidogrel	Did participant use clopidogrel in the last two weeks
	Yes		43	-	-
	No		1806	-	-
	AB_1M	Has patient used any antibiotics the previous 30 days?
	Yes		81	-	-
	No		1769	-	-
	MED.Antihypertensiva	Did participant use antihypertensive (=blood pressure lowering) medication in the last two weeks
	Yes		402	-	-
	No		1448	-	-
	MED.Anticoagulants	Did participant use anticoagulant medication in the last two weeks
	Yes		206	-	-
	No		1644	-	-
	MED_AC.Plateletinhibitors	Did participant use platelet inhibitory medication in the last two weeks
	Yes		159	-	-
	No		1691	-	-
	MED_PLATINH.ASA	Did participant use acetylsalicylic acid in the last two weeks (Such as ascal or carbasalaatcalcium)
	Yes		121	-	-
	No		1728	-	-
	MED_STAT.Rosuvastatin	Did participant use rosuvastatin in the last two weeks
	Yes		184	-	-
	No		1666	-	-
	MED.Cholesterol_lowering	Did participant use cholesterol lowering medication in the last two weeks
	Yes		384	-	-
	No		1466	-	-
	MED.Other	Did participant use other medication that do not fit in the above mentioned categories in the last two weeks (Medication that does not fall in the category of anticoagulant, antidiabetic, cholesterol lowering, antihypertensive, anti-inflammatory, psychotropic, vitaminD or antimycotic)
	Yes		744	-	-
	No		1106	-	-
	MED.No_other	Did participant use no other medication than their HIV medication in the last two weeks (except for potentially cART)
	Yes		538	-	-
	No		1312	-	-
2-year-mortality		Dead after 2 years follow up
	Yes		24(1.30%)	-	-
	No		1826(98.70%)	-	-
